# Supplementary material for: Comparative Evaluation of Viral Hepatitis Question Responses: ChatGPT-4.5 Outperforms Three Established Models
Source: Research Square preprint supplement (doi:10.21203/rs.3.rs-6935611/v1), 2025-07-18
Supplement: Supplementary file 1 [file 0447559329f64a528b142c4e.xlsx]

## Sheet: Sheet1
name	PhD area	publications on infectious diseases/hepatitis	number of publications	affiliation
Guiyang Wang	Mainly on Viral Hepatitis	Liu Y, Wang G, Chen Y, et al. HBcAg‐induced upregulated 4‐1BB ligand on B cells contributes to B‐cell hyperactivation during chronic hepatitis B infection. Journal of Medical Virology. 2019;91(5):781-790. doi:10.1002/jmv.25377	3 first-authoror co-first-author	Department of Infectious Diseases, Nanjing Drum Tower Hospital, The Affiliated Hospital of Nanjing University Medical School, Nanjing, Jiangsu, China
		Huang R, Wang G, Tian C, et al. Gamma-glutamyl-transpeptidase to platelet ratio is not superior to APRI,FIB-4 and RPR for diagnosing liver fibrosis in CHB patients in China. Sci Rep. 2017;7(1). doi:10.1038/s41598-017-09234-w
		Wang G, Liu Y, Huang R, et al. Characteristics of regulatory B cells in patients with chronic hepatitis B virus infection in different immune phases. Discov Med. 2017;23(128):295-304.
Juan Xia	Mainly on Viral Hepatitis	Huang R, Xia J, Wang J, Chen Y, Wu C. Letter: programmed death‐1—a predictor for antiviral treatment in chronic hepatitis B. Authors’ reply. Aliment Pharmacol Ther. 2020;52(4):749-750. doi:10.1111/apt.15924	7 first-author or co-first-author, 2 corresponding	Department of Infectious Diseases, Nanjing Drum Tower Hospital, The Affiliated Hospital of Nanjing University Medical School, Nanjing, Jiangsu, China
		Wang H, Wang J, Xia J, et al. Red cell distribution width to platelet ratio predicts liver fibrosis in patients with autoimmune hepatitis. Medicine. 2020;99(34):e21408. doi:10.1097/md.0000000000021408
		Xia J, Huang R, Chen Y, et al. Profiles of serum soluble programmed death‐1 and programmed death‐ligand 1 levels in chronic hepatitis B virus‐infected patients with different disease phases and after anti‐viral treatment. Aliment Pharmacol Ther. 2020;51(11):1180-1187. doi:10.1111/apt.15732
Bei Jia	Emerging Infectious Diseases, Liver Diseases	Huang R, Jia B, Wang G, Wu C. Non‐invasive fibrosis markers for chronic hepatitis B in sub‐Saharan Africa. Liver International. 2017;37(11):1738-1738. doi:10.1111/liv.13410	5 first-author or co-first-author	Department of Infectious Diseases, Nanjing Drum Tower Hospital, The Affiliated Hospital of Nanjing University Medical School, Nanjing, Jiangsu, China
		Jia B, Yan X, Chen Y, et al. A scoring model for predicting prognosis of patients with severe fever with thrombocytopenia syndrome. van Griensven J, ed. PLoS Negl Trop Dis. 2017;11(9):e0005909. doi:10.1371/journal.pntd.0005909
		Jia B, Wu W, Huang R, et al. Characterization of clinical features and outcome for human-to-human transmitted severe fever with thrombocytopenia syndrome. Infectious Diseases. 2018;50(8):601-608. doi:10.1080/23744235.2018.1449962
