# Supplementary material for: Comparative Evaluation of Viral Hepatitis Question Responses: ChatGPT-4.5 Outperforms Three Established Models
Source: Research Square preprint supplement (doi:10.21203/rs.3.rs-6935611/v1), 2025-07-18
Supplement: Supplementary file 1 [file a94599b74e800d167c6a92d6.pdf]

Supplementary Table 1a: Gemini-2.0 Responses to Questions

| Question                                          | Gemini-2.0 Response                                                                                                                                                                                                                                                                                                                                                                                                                                                                                                                                                                                                                                                                                                                                                                                                                                                                                                                                                                                                                                                                                                                                                                                                                                                                                                                                                                                                                                                                                                                                                                                                                                                                                                                                                                                                                                    |
|---------------------------------------------------|--------------------------------------------------------------------------------------------------------------------------------------------------------------------------------------------------------------------------------------------------------------------------------------------------------------------------------------------------------------------------------------------------------------------------------------------------------------------------------------------------------------------------------------------------------------------------------------------------------------------------------------------------------------------------------------------------------------------------------------------------------------------------------------------------------------------------------------------------------------------------------------------------------------------------------------------------------------------------------------------------------------------------------------------------------------------------------------------------------------------------------------------------------------------------------------------------------------------------------------------------------------------------------------------------------------------------------------------------------------------------------------------------------------------------------------------------------------------------------------------------------------------------------------------------------------------------------------------------------------------------------------------------------------------------------------------------------------------------------------------------------------------------------------------------------------------------------------------------------|
| <b>Topic: Concept</b>                             |                                                                                                                                                                                                                                                                                                                                                                                                                                                                                                                                                                                                                                                                                                                                                                                                                                                                                                                                                                                                                                                                                                                                                                                                                                                                                                                                                                                                                                                                                                                                                                                                                                                                                                                                                                                                                                                        |
| 1. What is viral hepatitis?                       | <p>Viral hepatitis refers to inflammation of the liver caused by viral infections. There are several types of viral hepatitis, including hepatitis A, B, C, D, and E. Each type is caused by a different virus, and they vary in their modes of transmission, severity, and potential long-term effects on health.</p> <ul style="list-style-type: none"> <li>- Hepatitis A: Typically spread through contaminated food or water, or by close contact with an infected person. It's usually acute and doesn't result in chronic infection.</li> <li>- Hepatitis B: Transmitted through contact with infected blood, semen, or other body fluids. It can be acute or chronic and may lead to serious liver damage, including cirrhosis or liver cancer.</li> <li>- Hepatitis C: Primarily spread through contact with infected blood. Like hepatitis B, it can cause both acute and chronic infection, potentially leading to severe liver damage.</li> <li>- Hepatitis D: Only occurs in people who are already infected with hepatitis B. It can exacerbate the symptoms of hepatitis B and lead to more severe liver damage.</li> <li>- Hepatitis E: Mainly transmitted through consumption of contaminated water. It's usually acute and resolves on its own, but it can be dangerous for pregnant women, leading to complications such as fulminant hepatitis.</li> </ul> <p>Viral hepatitis can cause a range of symptoms, including fatigue, jaundice (yellowing of the skin and eyes), abdominal pain, nausea, and vomiting. Treatment options vary depending on the type of hepatitis and whether it's acute or chronic. Vaccines are available for hepatitis A and B, which can help prevent these infections. Early diagnosis and treatment are important to prevent complications and reduce the risk of spreading the virus to others.</p> |
| 2. What diseases are included in viral hepatitis? | <p>Viral hepatitis refers to inflammation of the liver caused by viral infections. There are several types of viral hepatitis, each caused by a different virus:</p>                                                                                                                                                                                                                                                                                                                                                                                                                                                                                                                                                                                                                                                                                                                                                                                                                                                                                                                                                                                                                                                                                                                                                                                                                                                                                                                                                                                                                                                                                                                                                                                                                                                                                   |

|                                    |                                                                                                                                                                                                                                                                                                                                                                                                                                                                                                                                                                                                                                                                                                                                                                                                                                                                                                                                                                                                                                                                                                                                                                                                                                                                                                                                                                               |
|------------------------------------|-------------------------------------------------------------------------------------------------------------------------------------------------------------------------------------------------------------------------------------------------------------------------------------------------------------------------------------------------------------------------------------------------------------------------------------------------------------------------------------------------------------------------------------------------------------------------------------------------------------------------------------------------------------------------------------------------------------------------------------------------------------------------------------------------------------------------------------------------------------------------------------------------------------------------------------------------------------------------------------------------------------------------------------------------------------------------------------------------------------------------------------------------------------------------------------------------------------------------------------------------------------------------------------------------------------------------------------------------------------------------------|
|                                    | <p>1. Hepatitis A: This is caused by the hepatitis A virus (HAV) and is typically spread through contaminated food or water or close contact with an infected person. It doesn't usually result in chronic infection.</p> <p>2. Hepatitis B: Caused by the hepatitis B virus (HBV), it can be transmitted through contact with infected blood, semen, or other body fluids. It can lead to chronic infection and serious complications such as cirrhosis and liver cancer.</p> <p>3. Hepatitis C: Caused by the hepatitis C virus (HCV), it's usually spread through contact with infected blood, often due to sharing needles or other drug injection equipment. Hepatitis C can also result in chronic infection and lead to liver damage over time.</p> <p>4. Hepatitis D: This type only occurs in individuals who are already infected with hepatitis B. It's caused by the hepatitis D virus (HDV) and is typically spread through contact with infected blood.</p> <p>5. Hepatitis E: Caused by the hepatitis E virus (HEV), it's usually spread through contaminated water in areas with poor sanitation. While usually self-limiting, it can be more severe in pregnant women and those with underlying liver disease.</p> <p>These are the main types of viral hepatitis, each caused by different viruses and with varying modes of transmission and outcomes.</p> |
| 3. What is a full hepatitis panel? | <p>A full hepatitis panel, also known as a hepatitis serologic panel, is a blood test that evaluates the presence of antibodies and antigens associated with hepatitis viruses. It typically includes tests for hepatitis A, hepatitis B, hepatitis C, and sometimes hepatitis D and E. Here's a breakdown of what each component of the panel tests for:</p> <p>1. Hepatitis A virus (HAV) antibodies: This test checks for antibodies produced by the immune system in response to the hepatitis A virus. It indicates whether a person has been exposed to the virus or has immunity due to vaccination.</p>                                                                                                                                                                                                                                                                                                                                                                                                                                                                                                                                                                                                                                                                                                                                                               |

|                                   |                                                                                                                                                                                                                                                                                                                                                                                                                                                                                                                                                                                                                                                                                                                                                                                                                                                                                                                                                                                                                                                                                                                                                                                                                                                                                                                                              |
|-----------------------------------|----------------------------------------------------------------------------------------------------------------------------------------------------------------------------------------------------------------------------------------------------------------------------------------------------------------------------------------------------------------------------------------------------------------------------------------------------------------------------------------------------------------------------------------------------------------------------------------------------------------------------------------------------------------------------------------------------------------------------------------------------------------------------------------------------------------------------------------------------------------------------------------------------------------------------------------------------------------------------------------------------------------------------------------------------------------------------------------------------------------------------------------------------------------------------------------------------------------------------------------------------------------------------------------------------------------------------------------------|
|                                   | <p>2. Hepatitis B surface antigen (HBsAg): This test detects the presence of the hepatitis B surface antigen, which is a protein on the surface of the hepatitis B virus. A positive result indicates an active infection with hepatitis B.</p> <p>3. Hepatitis B surface antibody (anti-HBs): This test measures antibodies produced in response to the hepatitis B virus. A positive result indicates immunity to hepatitis B either from past infection or vaccination.</p> <p>4. Hepatitis B core antibody (anti-HBc): This test detects antibodies produced in response to the hepatitis B core antigen, which is a part of the hepatitis B virus. It can indicate either a current or past infection with hepatitis B.</p> <p>5. Hepatitis C virus (HCV) antibodies: This test checks for antibodies produced by the immune system in response to the hepatitis C virus. A positive result indicates exposure to the virus, but further testing is usually needed to confirm chronic infection.</p> <p>Additional tests for hepatitis D and E may be included depending on the specific requirements or suspected exposure of the individual being tested. These tests help healthcare providers diagnose and manage hepatitis infections, assess the need for treatment, and determine the risk of liver damage or complications.</p> |
| 4. What is hepatitis B virus DNA? | <p>Hepatitis B virus (HBV) DNA refers to the genetic material of the hepatitis B virus. HBV is a partially double-stranded DNA virus that primarily infects the liver, leading to inflammation and potentially serious liver damage. The HBV DNA can be found within the virus particles and also within infected liver cells.</p> <p>In clinical settings, measuring HBV DNA levels is crucial for diagnosing and monitoring hepatitis B infection. High levels of HBV DNA often indicate active viral replication, which can increase the risk of liver damage and transmission to others. Monitoring HBV DNA levels helps healthcare providers assess the effectiveness of antiviral treatment and determine the need for further intervention. Additionally, HBV DNA testing is important for evaluating the risk of disease progression and the development of complications such as liver cirrhosis and liver cancer.</p>                                                                                                                                                                                                                                                                                                                                                                                                              |
| 5. What is hepatitis C virus RNA? | <p>Hepatitis C virus (HCV) RNA refers to the genetic material of the hepatitis C virus. RNA, or ribonucleic acid, is a</p>                                                                                                                                                                                                                                                                                                                                                                                                                                                                                                                                                                                                                                                                                                                                                                                                                                                                                                                                                                                                                                                                                                                                                                                                                   |

|                                   |                                                                                                                                                                                                                                                                                                                                                                                                                                                                                                                                                                                                                                                                                                                                                                                                                                                                                                                                                                                                                                                                                                                                                                                                                                                                                                                                                                           |
|-----------------------------------|---------------------------------------------------------------------------------------------------------------------------------------------------------------------------------------------------------------------------------------------------------------------------------------------------------------------------------------------------------------------------------------------------------------------------------------------------------------------------------------------------------------------------------------------------------------------------------------------------------------------------------------------------------------------------------------------------------------------------------------------------------------------------------------------------------------------------------------------------------------------------------------------------------------------------------------------------------------------------------------------------------------------------------------------------------------------------------------------------------------------------------------------------------------------------------------------------------------------------------------------------------------------------------------------------------------------------------------------------------------------------|
|                                   | <p>molecule similar to DNA and serves as the genetic blueprint for viruses like HCV. In the case of hepatitis C, the RNA contains the instructions necessary for the virus to replicate and produce new viral particles. Detection of HCV RNA in a person's blood typically indicates an active infection with the virus. Testing for HCV RNA is important for diagnosing hepatitis C, monitoring the effectiveness of treatment, and assessing the risk of transmission to others.</p>                                                                                                                                                                                                                                                                                                                                                                                                                                                                                                                                                                                                                                                                                                                                                                                                                                                                                   |
| 6. What is hepatitis E virus RNA? | <p>Hepatitis E virus RNA refers to the genetic material of the hepatitis E virus (HEV) that is composed of ribonucleic acid (RNA). HEV is a single-stranded RNA virus that belongs to the genus Orthohepevirus in the family Hepeviridae. It is the causative agent of hepatitis E, which is typically a self-limiting liver disease characterized by symptoms such as jaundice, fatigue, nausea, and abdominal pain. The RNA of the hepatitis E virus contains the genetic instructions necessary for the virus to replicate and produce new viral particles within the host's cells.</p>                                                                                                                                                                                                                                                                                                                                                                                                                                                                                                                                                                                                                                                                                                                                                                                |
| 7. What is chronic hepatitis B?   | <p>Chronic hepatitis B is a long-term viral infection of the liver caused by the hepatitis B virus (HBV). When HBV infects the liver, it can lead to inflammation and damage over time. Chronic hepatitis B is diagnosed when the virus persists in the body for more than six months.</p> <p>Chronic hepatitis B can vary greatly in its severity and impact on the liver. Some people may have minimal liver damage and experience few or no symptoms, while others may develop serious complications such as cirrhosis (scarring of the liver), liver failure, or liver cancer.</p> <p>Symptoms of chronic hepatitis B can include fatigue, abdominal pain, jaundice (yellowing of the skin and eyes), nausea, and loss of appetite. However, many people with chronic hepatitis B may not have any symptoms at all.</p> <p>Treatment for chronic hepatitis B aims to reduce the risk of liver damage and complications. This may involve antiviral medications to suppress the virus, regular monitoring of liver function and viral load, and lifestyle changes such as avoiding alcohol and maintaining a healthy diet. In some cases, additional treatments such as interferon therapy or liver transplantation may be necessary.</p> <p>It's important for individuals with chronic hepatitis B to work closely with their healthcare providers to manage the</p> |

|                                                                      |                                                                                                                                                                                                                                                                                                                                                                                                                                                                                                                                                                                                                                                                                                                                                                                                                                                                                                                                                                                                                                                                                                                                                                                                                                                         |
|----------------------------------------------------------------------|---------------------------------------------------------------------------------------------------------------------------------------------------------------------------------------------------------------------------------------------------------------------------------------------------------------------------------------------------------------------------------------------------------------------------------------------------------------------------------------------------------------------------------------------------------------------------------------------------------------------------------------------------------------------------------------------------------------------------------------------------------------------------------------------------------------------------------------------------------------------------------------------------------------------------------------------------------------------------------------------------------------------------------------------------------------------------------------------------------------------------------------------------------------------------------------------------------------------------------------------------------|
|                                                                      | condition and reduce the risk of long-term complications. Regular monitoring and adherence to treatment can help improve outcomes and quality of life for those living with chronic hepatitis B.                                                                                                                                                                                                                                                                                                                                                                                                                                                                                                                                                                                                                                                                                                                                                                                                                                                                                                                                                                                                                                                        |
| 8. What is chronic hepatitis C?                                      | <p>Chronic hepatitis C is a long-term infection caused by the hepatitis C virus (HCV). When someone is infected with HCV, their immune system typically cannot clear the virus from their body, leading to a persistent infection. Over time, this ongoing infection can lead to inflammation and damage to the liver, potentially progressing to more serious liver problems such as cirrhosis (scarring of the liver) or liver cancer.</p> <p>Chronic hepatitis C often develops gradually over many years, and in some cases, people may not experience any symptoms for decades. However, if symptoms do occur, they can include fatigue, nausea, loss of appetite, abdominal pain, and jaundice (yellowing of the skin and eyes).</p> <p>It's important for individuals with chronic hepatitis C to receive appropriate medical care and monitoring to help manage the infection and reduce the risk of complications. Treatment options have improved significantly in recent years with the development of direct-acting antiviral medications, which can cure the infection in most cases. Early diagnosis and treatment are crucial for preventing liver damage and improving long-term outcomes for individuals with chronic hepatitis C.</p> |
| <b>Topic: Risk Factors</b>                                           |                                                                                                                                                                                                                                                                                                                                                                                                                                                                                                                                                                                                                                                                                                                                                                                                                                                                                                                                                                                                                                                                                                                                                                                                                                                         |
| 9. Under what conditions is one more likely to contract hepatitis A? | <p>Hepatitis A is primarily contracted through the ingestion of contaminated food or water. The virus is commonly found in regions with poor sanitation and hygiene practices. Therefore, individuals are more likely to contract hepatitis A in the following conditions:</p> <ol style="list-style-type: none"> <li>1. <b>Poor Sanitation</b>: Areas with inadequate sanitation facilities, such as improper waste disposal or contaminated water sources, increase the risk of contracting hepatitis A.</li> <li>2. <b>Limited Access to Clean Water</b>: Communities or regions where clean water is scarce or not readily available are at a higher risk. Drinking water contaminated with the hepatitis A virus can lead to infection.</li> </ol>                                                                                                                                                                                                                                                                                                                                                                                                                                                                                                 |

|                                                                       |                                                                                                                                                                                                                                                                                                                                                                                                                                                                                                                                                                                                                                                                                                                                                                                                                                                                                                                                                                                                                                                                                                                                                                                                                                                                                                                                                                                                                                                                                              |
|-----------------------------------------------------------------------|----------------------------------------------------------------------------------------------------------------------------------------------------------------------------------------------------------------------------------------------------------------------------------------------------------------------------------------------------------------------------------------------------------------------------------------------------------------------------------------------------------------------------------------------------------------------------------------------------------------------------------------------------------------------------------------------------------------------------------------------------------------------------------------------------------------------------------------------------------------------------------------------------------------------------------------------------------------------------------------------------------------------------------------------------------------------------------------------------------------------------------------------------------------------------------------------------------------------------------------------------------------------------------------------------------------------------------------------------------------------------------------------------------------------------------------------------------------------------------------------|
|                                                                       | <p>3. <b>Crowded Living Conditions</b>: Overcrowded living environments, such as refugee camps or densely populated urban areas with inadequate sanitation, can facilitate the spread of the virus.</p> <p>4. <b>Travel to Endemic Areas</b>: Traveling to regions where hepatitis A is endemic increases the risk of exposure. It's essential to take precautions such as drinking bottled water and avoiding raw or undercooked food when traveling to such areas.</p> <p>5. <b>Poor Personal Hygiene</b>: Individuals who do not practice proper hand hygiene, especially after using the restroom or before handling food, are more susceptible to hepatitis A infection.</p> <p>6. <b>Close Contact with Infected Individuals</b>: Direct contact with an infected person's feces or contaminated objects can transmit the virus. This risk is particularly high in households or institutions where hygiene practices may be suboptimal.</p> <p>7. <b>Engaging in Risky Behaviors</b>: Certain behaviors, such as illicit drug use or engaging in unprotected sexual activity, can increase the risk of hepatitis A transmission.</p> <p>Vaccination is an effective preventive measure against hepatitis A and is recommended for individuals traveling to endemic areas or those at increased risk of exposure. Additionally, practicing good hygiene, including regular handwashing and consuming safe food and water, can help reduce the likelihood of contracting the virus.</p> |
| 10. Under what conditions is one more likely to contract hepatitis B? | <p>Hepatitis B is primarily transmitted through contact with infected bodily fluids, such as blood or semen, of an infected person. The following conditions increase the risk of contracting hepatitis B:</p> <p>1. <b>Unprotected Sex</b>: Engaging in sexual activity with an infected person without using protection, such as condoms, increases the risk of transmission.</p>                                                                                                                                                                                                                                                                                                                                                                                                                                                                                                                                                                                                                                                                                                                                                                                                                                                                                                                                                                                                                                                                                                          |

|                                                                       |                                                                                                                                                                                                                                                                                                                                                                                                                                                                                                                                                                                                                                                                                                                                                                                                                                                                                                                                                                                                                                                                                                                                                                                                                                                                                                                |
|-----------------------------------------------------------------------|----------------------------------------------------------------------------------------------------------------------------------------------------------------------------------------------------------------------------------------------------------------------------------------------------------------------------------------------------------------------------------------------------------------------------------------------------------------------------------------------------------------------------------------------------------------------------------------------------------------------------------------------------------------------------------------------------------------------------------------------------------------------------------------------------------------------------------------------------------------------------------------------------------------------------------------------------------------------------------------------------------------------------------------------------------------------------------------------------------------------------------------------------------------------------------------------------------------------------------------------------------------------------------------------------------------|
|                                                                       | <p>2. <b>**Sharing Needles:**</b> Sharing needles, syringes, or other drug paraphernalia with an infected person can transmit the virus.</p> <p>3. <b>**Mother to Child Transmission:**</b> Infected mothers can transmit the virus to their newborn during childbirth.</p> <p>4. <b>**Blood Transfusions:**</b> Though less common now due to screening procedures, receiving blood transfusions or organ transplants from infected donors can transmit the virus.</p> <p>5. <b>**Occupational Exposure:**</b> Healthcare workers or individuals in occupations where they may come into contact with infected blood are at higher risk if proper precautions are not taken.</p> <p>6. <b>**Sharing Personal Items:**</b> Sharing items such as razors or toothbrushes with an infected person can also lead to transmission, though this is less common.</p> <p>7. <b>**Invasive Medical Procedures:**</b> Receiving medical or dental procedures with instruments that haven't been properly sterilized can also pose a risk.</p> <p>It's important to practice good hygiene, use protection during sexual activity, and avoid sharing needles or personal items to reduce the risk of contracting hepatitis B. Vaccination is also available and highly effective in preventing hepatitis B infection.</p> |
| 11. Under what conditions is one more likely to contract hepatitis E? | <p>Hepatitis E is typically transmitted through the consumption of contaminated water or food, particularly in areas with poor sanitation and hygiene practices. Therefore, individuals are more likely to contract hepatitis E in regions where there is inadequate sanitation infrastructure, such as certain parts of Asia, Africa, and Central America. Additionally, factors such as drinking untreated water, consuming undercooked or raw shellfish, or living in crowded and unsanitary conditions can increase the risk of contracting the virus. Pregnant women and individuals with weakened immune</p>                                                                                                                                                                                                                                                                                                                                                                                                                                                                                                                                                                                                                                                                                             |

|                                                                       |                                                                                                                                                                                                                                                                                                                                                                                                                                                                                                                                                                                                                                                                                                                                                                                                                                                                                                                                                                                                                                                                                                                                                                                                                                                                                                                                                                                                                                                                                                                                                                                                                                                                                                                                                                                                                                                                                                                                                                                                                                                                          |
|-----------------------------------------------------------------------|--------------------------------------------------------------------------------------------------------------------------------------------------------------------------------------------------------------------------------------------------------------------------------------------------------------------------------------------------------------------------------------------------------------------------------------------------------------------------------------------------------------------------------------------------------------------------------------------------------------------------------------------------------------------------------------------------------------------------------------------------------------------------------------------------------------------------------------------------------------------------------------------------------------------------------------------------------------------------------------------------------------------------------------------------------------------------------------------------------------------------------------------------------------------------------------------------------------------------------------------------------------------------------------------------------------------------------------------------------------------------------------------------------------------------------------------------------------------------------------------------------------------------------------------------------------------------------------------------------------------------------------------------------------------------------------------------------------------------------------------------------------------------------------------------------------------------------------------------------------------------------------------------------------------------------------------------------------------------------------------------------------------------------------------------------------------------|
|                                                                       | systems are also at a higher risk of developing severe complications from hepatitis E infection.                                                                                                                                                                                                                                                                                                                                                                                                                                                                                                                                                                                                                                                                                                                                                                                                                                                                                                                                                                                                                                                                                                                                                                                                                                                                                                                                                                                                                                                                                                                                                                                                                                                                                                                                                                                                                                                                                                                                                                         |
| 12. Under what conditions is one more likely to contract hepatitis C? | <p>Hepatitis C is primarily transmitted through exposure to infected blood. Here are some common scenarios where individuals might be at a higher risk of contracting hepatitis C:</p> <ol style="list-style-type: none"> <li>1. <b>**Injection Drug Use:**</b> Sharing needles or other equipment used to inject drugs greatly increases the risk of hepatitis C transmission.</li> <li>2. <b>**Blood Transfusions or Organ Transplants before 1992:**</b> Prior to 1992, donated blood and organs were not routinely screened for hepatitis C, so individuals who received blood transfusions or organ transplants before this time may have a higher risk.</li> <li>3. <b>**Healthcare Settings:**</b> Accidental needle sticks or exposure to infected blood in healthcare settings can transmit hepatitis C.</li> <li>4. <b>**Mother-to-Child Transmission:**</b> Pregnant women with hepatitis C can transmit the virus to their babies during childbirth, although the risk is relatively low.</li> <li>5. <b>**Unprotected Sex:**</b> Although the risk is lower compared to other routes of transmission, having unprotected sex with an infected partner can still lead to transmission of hepatitis C, especially in cases of rough or traumatic sexual practices that may cause bleeding.</li> <li>6. <b>**Sharing Personal Items:**</b> Sharing items such as razors, toothbrushes, or other personal care items that may have come into contact with infected blood can also pose a risk, although it's relatively low compared to direct blood-to-blood contact.</li> </ol> <p>It's important to note that hepatitis C is not transmitted through casual contact such as hugging, kissing, sharing food or drinks, or through coughing or sneezing. Taking precautions such as avoiding sharing needles, practicing safe sex, and being cautious in healthcare settings can help reduce the risk of contracting hepatitis C. Additionally, screening and testing for hepatitis C can help identify infections early and prevent further transmission.</p> |
| 13. Under what conditions is one more likely to contract hepatitis D? | Hepatitis D, also known as delta hepatitis, is caused by the hepatitis D virus (HDV). Unlike other types of viral hepatitis, hepatitis D cannot replicate on its own and requires the presence of hepatitis B virus (HBV) to cause infection.                                                                                                                                                                                                                                                                                                                                                                                                                                                                                                                                                                                                                                                                                                                                                                                                                                                                                                                                                                                                                                                                                                                                                                                                                                                                                                                                                                                                                                                                                                                                                                                                                                                                                                                                                                                                                            |



Therefore, the primary risk factor for contracting hepatitis D is concurrent infection with HBV.

People who are at increased risk of HBV infection are also at risk for hepatitis D. These risk factors include:

1. **\*\*Injection Drug Use:\*\*** Sharing needles or syringes contaminated with HBV-infected blood increases the risk of both HBV and HDV transmission.
2. **\*\*Unprotected Sexual Activity:\*\*** Engaging in unprotected sexual activity with an HBV-infected person can lead to transmission of both HBV and HDV.
3. **\*\*Occupational Exposure:\*\*** Healthcare workers or individuals exposed to blood or bodily fluids may be at risk if proper precautions are not taken to prevent HBV transmission.
4. **\*\*Mother-to-Child Transmission:\*\*** Infants born to HBV-infected mothers are at risk of acquiring both HBV and HDV during childbirth.
5. **\*\*Blood Transfusion:\*\*** Although the risk is low in regions with strict screening protocols, receiving blood transfusions or blood products contaminated with HBV can lead to HDV infection.
6. **\*\*Chronic Liver Disease:\*\*** People with underlying liver conditions, such as cirrhosis or chronic hepatitis B, are more susceptible to HDV infection if exposed to the virus.

It's important to note that hepatitis D is relatively rare in regions where hepatitis B vaccination is widespread and blood screening practices are stringent. However, in areas where HBV is endemic and vaccination coverage is low, the risk of hepatitis D transmission may be higher. Vaccination against HBV is an effective preventive measure against both HBV and HDV infection.

|                                                                                                                               |                                                                                                                                                                                                                                                                                                                                                                                                                                                                                                                                                                                                                                                                                                                                                                                                                                                                                                                                                                                                                                                                                                                                                                                                                                                                                                                                                                                                                                                                                                                                                                                                                                                                                                                                                                                                                                                                                                                                                                                                                                                                                                                                                                                                                                                                                                                                                                                             |
|-------------------------------------------------------------------------------------------------------------------------------|---------------------------------------------------------------------------------------------------------------------------------------------------------------------------------------------------------------------------------------------------------------------------------------------------------------------------------------------------------------------------------------------------------------------------------------------------------------------------------------------------------------------------------------------------------------------------------------------------------------------------------------------------------------------------------------------------------------------------------------------------------------------------------------------------------------------------------------------------------------------------------------------------------------------------------------------------------------------------------------------------------------------------------------------------------------------------------------------------------------------------------------------------------------------------------------------------------------------------------------------------------------------------------------------------------------------------------------------------------------------------------------------------------------------------------------------------------------------------------------------------------------------------------------------------------------------------------------------------------------------------------------------------------------------------------------------------------------------------------------------------------------------------------------------------------------------------------------------------------------------------------------------------------------------------------------------------------------------------------------------------------------------------------------------------------------------------------------------------------------------------------------------------------------------------------------------------------------------------------------------------------------------------------------------------------------------------------------------------------------------------------------------|
| <p>14. Is hepatitis B hereditary? My mother has hepatitis B; what should I be aware of? Should I undergo further testing?</p> | <p>Hepatitis B is primarily transmitted through exposure to infected blood or body fluids, rather than being hereditary. However, there is a small risk of transmission from an infected mother to her child during childbirth. If your mother has hepatitis B, it's important for you to be aware of certain precautions and considerations:</p> <ol style="list-style-type: none"> <li>1. <b>Transmission Risk</b>: As mentioned, there is a risk of transmission from an infected mother to her child during childbirth. However, this risk can be significantly reduced through proper medical interventions, such as administering hepatitis B vaccine and hepatitis B immune globulin (HBIG) to the newborn within 12 hours of birth.</li> <li>2. <b>Vaccination</b>: If you haven't already been vaccinated against hepatitis B, it's highly recommended that you receive the vaccine. The hepatitis B vaccine is safe and effective in preventing infection.</li> <li>3. <b>Testing</b>: Given your mother's hepatitis B status, it's advisable to undergo testing to determine your own hepatitis B status. This typically involves a simple blood test to check for the presence of hepatitis B surface antigen (HBsAg) and antibodies. If you test negative for HBsAg, it's recommended to receive the hepatitis B vaccine series for protection.</li> <li>4. <b>Precautions</b>: If you test positive for hepatitis B or are unsure of your status, it's important to take precautions to prevent transmission to others. This includes avoiding sharing personal items such as toothbrushes or razors, practicing safe sex, and ensuring that healthcare providers are aware of your hepatitis B status.</li> <li>5. <b>Regular Monitoring</b>: If you test positive for hepatitis B, it's essential to establish care with a healthcare provider who can monitor your liver health through regular check-ups and blood tests. Most people with chronic hepatitis B do not require treatment immediately, but regular monitoring is important to detect any signs of liver damage or disease progression.</li> </ol> <p>Overall, while hepatitis B can be a serious condition, there are effective measures available for prevention, testing, and management. It's important to stay informed and proactive about your health, especially if you have a family history of</p> |
|-------------------------------------------------------------------------------------------------------------------------------|---------------------------------------------------------------------------------------------------------------------------------------------------------------------------------------------------------------------------------------------------------------------------------------------------------------------------------------------------------------------------------------------------------------------------------------------------------------------------------------------------------------------------------------------------------------------------------------------------------------------------------------------------------------------------------------------------------------------------------------------------------------------------------------------------------------------------------------------------------------------------------------------------------------------------------------------------------------------------------------------------------------------------------------------------------------------------------------------------------------------------------------------------------------------------------------------------------------------------------------------------------------------------------------------------------------------------------------------------------------------------------------------------------------------------------------------------------------------------------------------------------------------------------------------------------------------------------------------------------------------------------------------------------------------------------------------------------------------------------------------------------------------------------------------------------------------------------------------------------------------------------------------------------------------------------------------------------------------------------------------------------------------------------------------------------------------------------------------------------------------------------------------------------------------------------------------------------------------------------------------------------------------------------------------------------------------------------------------------------------------------------------------|

|                                                                                |                                                                                                                                                                                                                                                                                                                                                                                                                                                                                                                                                                                                                                                                                                                                                                                                                                                                                                                                                                                                                                                                                                                                                                                                                                                                                                                                                                                                                                                                                                                                                                                                                                                                                                                                                                                                                                                                                                                                       |
|--------------------------------------------------------------------------------|---------------------------------------------------------------------------------------------------------------------------------------------------------------------------------------------------------------------------------------------------------------------------------------------------------------------------------------------------------------------------------------------------------------------------------------------------------------------------------------------------------------------------------------------------------------------------------------------------------------------------------------------------------------------------------------------------------------------------------------------------------------------------------------------------------------------------------------------------------------------------------------------------------------------------------------------------------------------------------------------------------------------------------------------------------------------------------------------------------------------------------------------------------------------------------------------------------------------------------------------------------------------------------------------------------------------------------------------------------------------------------------------------------------------------------------------------------------------------------------------------------------------------------------------------------------------------------------------------------------------------------------------------------------------------------------------------------------------------------------------------------------------------------------------------------------------------------------------------------------------------------------------------------------------------------------|
|                                                                                | hepatitis B.                                                                                                                                                                                                                                                                                                                                                                                                                                                                                                                                                                                                                                                                                                                                                                                                                                                                                                                                                                                                                                                                                                                                                                                                                                                                                                                                                                                                                                                                                                                                                                                                                                                                                                                                                                                                                                                                                                                          |
| <b>Topic: Diagnose</b>                                                         |                                                                                                                                                                                                                                                                                                                                                                                                                                                                                                                                                                                                                                                                                                                                                                                                                                                                                                                                                                                                                                                                                                                                                                                                                                                                                                                                                                                                                                                                                                                                                                                                                                                                                                                                                                                                                                                                                                                                       |
| 15. What clinical symptoms should be considered for viral hepatitis diagnosis? | <p>For diagnosing viral hepatitis, there are several clinical symptoms and signs to consider:</p> <ol style="list-style-type: none"> <li>1. Jaundice: Yellowing of the skin and eyes due to elevated levels of bilirubin in the bloodstream. This is a common symptom of hepatitis.</li> <li>2. Fatigue: Feeling extremely tired or weak, which can be a result of the body fighting off the infection.</li> <li>3. Abdominal pain: Discomfort or pain in the upper right side of the abdomen, where the liver is located.</li> <li>4. Loss of appetite: Not feeling hungry or having a decreased desire to eat.</li> <li>5. Nausea and vomiting: Feeling sick to your stomach and possibly vomiting.</li> <li>6. Dark urine: Urine that appears darker in color than usual, often resembling tea or cola due to increased bilirubin levels.</li> <li>7. Pale stools: Stools that are light or clay-colored, which can indicate a lack of bilirubin reaching the intestines.</li> <li>8. Fever: Elevated body temperature, though not always present in cases of hepatitis.</li> <li>9. Joint pain: Some individuals may experience joint pain or discomfort, particularly in cases of hepatitis B and C.</li> <li>10. Enlarged liver or spleen: In some cases, the liver or spleen may become enlarged and tender to the touch.</li> </ol> <p>It's important to note that not everyone with viral hepatitis will experience all of these symptoms, and some individuals may not exhibit any symptoms at all, especially in the early stages of the infection. Additionally, the severity and duration of symptoms can vary depending on the type of hepatitis virus and the individual's overall health. If there is a suspicion of viral hepatitis based on clinical symptoms, further testing such as blood tests for liver function and specific viral markers will be necessary for confirmation and appropriate management.</p> |
| 16. What laboratory tests are needed to help doctors diagnose viral hepatitis? | <p>In diagnosing viral hepatitis, several laboratory tests play a crucial role in determining the type of hepatitis virus involved, assessing the severity of the infection, and monitoring the progression of the disease. Here are some key laboratory tests typically used:</p>                                                                                                                                                                                                                                                                                                                                                                                                                                                                                                                                                                                                                                                                                                                                                                                                                                                                                                                                                                                                                                                                                                                                                                                                                                                                                                                                                                                                                                                                                                                                                                                                                                                    |

|                                                                                               |                                                                                                                                                                                                                                                                                                                                                                                                                                                                                                                                                                                                                                                                                                                                                                                                                                                                                                                                                                                                                                                                                                                                                                                                                                                                                                                                                                                                                                                                                                                                                                                                                                                                                                                                                                                                                                                                                                                                                                                                                               |
|-----------------------------------------------------------------------------------------------|-------------------------------------------------------------------------------------------------------------------------------------------------------------------------------------------------------------------------------------------------------------------------------------------------------------------------------------------------------------------------------------------------------------------------------------------------------------------------------------------------------------------------------------------------------------------------------------------------------------------------------------------------------------------------------------------------------------------------------------------------------------------------------------------------------------------------------------------------------------------------------------------------------------------------------------------------------------------------------------------------------------------------------------------------------------------------------------------------------------------------------------------------------------------------------------------------------------------------------------------------------------------------------------------------------------------------------------------------------------------------------------------------------------------------------------------------------------------------------------------------------------------------------------------------------------------------------------------------------------------------------------------------------------------------------------------------------------------------------------------------------------------------------------------------------------------------------------------------------------------------------------------------------------------------------------------------------------------------------------------------------------------------------|
|                                                                                               | <p>1. <b>**Liver Function Tests (LFTs)**:</b> These tests assess the overall health of the liver. LFTs measure various enzymes, proteins, and substances produced or processed by the liver, such as alanine aminotransferase (ALT), aspartate aminotransferase (AST), alkaline phosphatase (ALP), bilirubin, and albumin. Elevated levels of ALT and AST, in particular, can indicate liver inflammation or damage.</p> <p>2. <b>**Serology Tests for Hepatitis Viruses**:</b> These tests detect specific antibodies and antigens associated with different hepatitis viruses. Common serology tests include:</p> <ul style="list-style-type: none"> <li>- Hepatitis B Surface Antigen (HBsAg): Presence indicates acute or chronic hepatitis B infection.</li> <li>- Hepatitis B Core Antibody (anti-HBc): Indicates past or ongoing hepatitis B infection.</li> <li>- Hepatitis B Surface Antibody (anti-HBs): Indicates immunity to hepatitis B.</li> <li>- Hepatitis C Antibody (anti-HCV): Detects antibodies against the hepatitis C virus, indicating exposure to the virus.</li> <li>- Hepatitis C RNA: Detects the genetic material of the hepatitis C virus, confirming active infection.</li> </ul> <p>3. <b>**Hepatitis A Serology**:</b> Tests for antibodies against the hepatitis A virus (anti-HAV IgM and anti-HAV IgG) can confirm recent or past hepatitis A infection.</p> <p>4. <b>**Hepatitis E Serology**:</b> Similar to hepatitis A, serologic tests for antibodies against hepatitis E virus (anti-HEV IgM and anti-HEV IgG) help diagnose acute or past hepatitis E infection.</p> <p>5. <b>**Liver Biopsy**:</b> While not always necessary, a liver biopsy may be performed in certain cases to assess the extent of liver damage and to guide treatment decisions.</p> <p>These tests, along with a thorough medical history and physical examination, help doctors accurately diagnose viral hepatitis and determine the appropriate course of treatment and management for the patient.</p> |
| 17. During a routine physical examination, is it necessary to perform a full hepatitis panel? | Performing a full hepatitis panel during a routine physical examination depends on various factors such as the individual's medical history, risk factors, and local prevalence rates of hepatitis. In general, for asymptomatic individuals                                                                                                                                                                                                                                                                                                                                                                                                                                                                                                                                                                                                                                                                                                                                                                                                                                                                                                                                                                                                                                                                                                                                                                                                                                                                                                                                                                                                                                                                                                                                                                                                                                                                                                                                                                                  |

|                                                                                  |                                                                                                                                                                                                                                                                                                                                                                                                                                                                                                                                                                                                                                                                                                                                                                                                                                                                                                                                                                                                                                                                                                                                                                                                                                                                                                                                                                                                                                              |
|----------------------------------------------------------------------------------|----------------------------------------------------------------------------------------------------------------------------------------------------------------------------------------------------------------------------------------------------------------------------------------------------------------------------------------------------------------------------------------------------------------------------------------------------------------------------------------------------------------------------------------------------------------------------------------------------------------------------------------------------------------------------------------------------------------------------------------------------------------------------------------------------------------------------------------------------------------------------------------------------------------------------------------------------------------------------------------------------------------------------------------------------------------------------------------------------------------------------------------------------------------------------------------------------------------------------------------------------------------------------------------------------------------------------------------------------------------------------------------------------------------------------------------------|
|                                                                                  | <p>without known risk factors for hepatitis, routine screening may not be necessary. However, if the patient has specific risk factors such as a history of injection drug use, high-risk sexual behaviors, occupational exposure to blood or body fluids, or if they were born in or have traveled to areas where hepatitis is prevalent, then screening may be warranted.</p> <p>It's essential to consider the potential benefits and risks of screening for hepatitis, as well as the patient's preferences and values. As a chief physician, I would recommend discussing the rationale for hepatitis screening with the patient, educating them about the different types of hepatitis, and jointly deciding whether screening is appropriate based on their individual circumstances. Additionally, vaccination against hepatitis A and B may be recommended for certain individuals based on risk factors and vaccination history.</p>                                                                                                                                                                                                                                                                                                                                                                                                                                                                                               |
| 18. Under what circumstances should co-infection with hepatitis D be considered? | <p>Hepatitis D, also known as delta hepatitis, is a viral infection that occurs only in individuals who are infected with the hepatitis B virus (HBV). Co-infection with hepatitis D should be considered in the following circumstances:</p> <ol style="list-style-type: none"> <li>1. <b>**Presence of Hepatitis B infection**</b>: Since hepatitis D can only occur in individuals who are already infected with hepatitis B, anyone diagnosed with acute or chronic hepatitis B should be screened for hepatitis D co-infection.</li> <li>2. <b>**High-risk populations**</b>: People who are at a higher risk of hepatitis B infection, such as injection drug users, individuals with multiple sexual partners, healthcare workers, and infants born to infected mothers, should be considered for hepatitis D screening.</li> <li>3. <b>**Liver dysfunction**</b>: Patients with unexplained liver dysfunction, including elevated liver enzymes (ALT and AST), should be evaluated for possible hepatitis D co-infection, especially if they have a history of hepatitis B infection.</li> <li>4. <b>**Travel history**</b>: Individuals with a history of travel to regions where hepatitis D is endemic, such as parts of Africa, Eastern Europe, the Mediterranean Basin, and the Middle East, should be screened for hepatitis D if they present with symptoms of hepatitis or have risk factors for viral hepatitis.</li> </ol> |

|                                                                               |                                                                                                                                                                                                                                                                                                                                                                                                                                                                                                                                                                                                                                                                                                                                                                                                                                                                                                                                                                                                                                                                                                                                                                                                                                                                                                                                                                                     |
|-------------------------------------------------------------------------------|-------------------------------------------------------------------------------------------------------------------------------------------------------------------------------------------------------------------------------------------------------------------------------------------------------------------------------------------------------------------------------------------------------------------------------------------------------------------------------------------------------------------------------------------------------------------------------------------------------------------------------------------------------------------------------------------------------------------------------------------------------------------------------------------------------------------------------------------------------------------------------------------------------------------------------------------------------------------------------------------------------------------------------------------------------------------------------------------------------------------------------------------------------------------------------------------------------------------------------------------------------------------------------------------------------------------------------------------------------------------------------------|
|                                                                               | <p>5. <b>**Immunocompromised individuals**</b>: People who are immunocompromised, such as those living with HIV/AIDS or undergoing immunosuppressive therapy, may be at increased risk of hepatitis D infection and should be considered for screening.</p> <p>6. <b>**Family history**</b>: Individuals with a family history of hepatitis D or known exposure to someone with hepatitis D should also be screened for the virus, especially if they have a history of hepatitis B infection.</p> <p>7. <b>**Clinical suspicion**</b>: Healthcare providers should maintain a high index of suspicion for hepatitis D co-infection in patients with acute or chronic hepatitis B who present with atypical or severe liver disease, as hepatitis D can exacerbate the course of hepatitis B infection and lead to more severe liver damage.</p> <p>In summary, hepatitis D co-infection should be considered in individuals with hepatitis B infection, especially in high-risk populations, those with unexplained liver dysfunction, individuals with a history of travel to endemic regions, immunocompromised individuals, those with a family history of hepatitis D, and patients with atypical or severe liver disease. Early detection and management of hepatitis D co-infection are essential to prevent progression to more severe liver disease and complications.</p> |
| <p>19. Under what circumstances should chronic hepatitis E be considered?</p> | <p>Chronic hepatitis E is an uncommon but noteworthy condition that should be considered in individuals with persistent liver inflammation, especially in regions where hepatitis E virus (HEV) is endemic. While acute hepatitis E typically resolves on its own within a few weeks to months, chronic hepatitis E occurs when the infection persists for more than six months, leading to ongoing liver inflammation.</p> <p>It's important to consider chronic hepatitis E in individuals who have:</p> <p>1. <b>**Persistent Liver Abnormalities**</b>: Elevated liver enzymes (such as ALT and AST) persisting for more than six months without any other identifiable cause could indicate chronic hepatitis E.</p>                                                                                                                                                                                                                                                                                                                                                                                                                                                                                                                                                                                                                                                           |

|                                                                                          |                                                                                                                                                                                                                                                                                                                                                                                                                                                                                                                                                                                                                                                                                                                                                                                                                                                                                                                                                                                                                                                                                                                                                                                                                                                                                                                                                                                                                                                                                                                                                                                                    |
|------------------------------------------------------------------------------------------|----------------------------------------------------------------------------------------------------------------------------------------------------------------------------------------------------------------------------------------------------------------------------------------------------------------------------------------------------------------------------------------------------------------------------------------------------------------------------------------------------------------------------------------------------------------------------------------------------------------------------------------------------------------------------------------------------------------------------------------------------------------------------------------------------------------------------------------------------------------------------------------------------------------------------------------------------------------------------------------------------------------------------------------------------------------------------------------------------------------------------------------------------------------------------------------------------------------------------------------------------------------------------------------------------------------------------------------------------------------------------------------------------------------------------------------------------------------------------------------------------------------------------------------------------------------------------------------------------|
|                                                                                          | <p>2. <b>**Immunosuppression:**</b> Patients who are immunocompromised, such as organ transplant recipients or those with HIV/AIDS, are at higher risk of developing chronic hepatitis E due to their reduced ability to clear the virus.</p> <p>3. <b>**Pregnancy:**</b> Pregnant women are at an increased risk of developing severe complications from hepatitis E infection, including chronic hepatitis E, especially during the third trimester.</p> <p>4. <b>**Travel History or Residence in Endemic Areas:**</b> Chronic hepatitis E should be considered in individuals with a history of travel to or residence in regions where hepatitis E is prevalent, such as parts of Asia, Africa, the Middle East, and Central America.</p> <p>5. <b>**Blood Transfusion or Organ Transplant:**</b> While rare, chronic hepatitis E can also occur in individuals who have received blood transfusions or organ transplants from donors infected with the hepatitis E virus.</p> <p>Given its potential to cause progressive liver damage, early recognition and appropriate management of chronic hepatitis E are essential. Treatment options include reducing immunosuppression in transplant patients, using antiviral therapy, or in some cases, considering liver transplantation for severe cases. Regular monitoring of liver function and HEV RNA levels is also crucial in managing this condition. Ultimately, raising awareness about chronic hepatitis E among healthcare providers is key to ensuring timely diagnosis and intervention, particularly in at-risk populations.</p> |
| 20. Does a positive hepatitis A virus antibody test definitely mean one has hepatitis A? | <p>A positive hepatitis A virus antibody test typically indicates either a current or past infection with the hepatitis A virus (HAV). However, there are a few factors to consider:</p> <p>1. <b>**Past Infection**</b>: A positive result could mean that the individual has been infected with the hepatitis A virus at some point in the past and has since recovered. In such cases, the presence of antibodies suggests immunity to future hepatitis A infections.</p> <p>2. <b>**Current Infection**</b>: It's also possible that a positive result indicates an ongoing acute infection with the hepatitis A</p>                                                                                                                                                                                                                                                                                                                                                                                                                                                                                                                                                                                                                                                                                                                                                                                                                                                                                                                                                                           |

|                                                                                                                                       |                                                                                                                                                                                                                                                                                                                                                                                                                                                                                                                                                                                                                                                                                                                                                                                                                                                                                                                     |
|---------------------------------------------------------------------------------------------------------------------------------------|---------------------------------------------------------------------------------------------------------------------------------------------------------------------------------------------------------------------------------------------------------------------------------------------------------------------------------------------------------------------------------------------------------------------------------------------------------------------------------------------------------------------------------------------------------------------------------------------------------------------------------------------------------------------------------------------------------------------------------------------------------------------------------------------------------------------------------------------------------------------------------------------------------------------|
|                                                                                                                                       | <p>virus. In this scenario, other clinical and laboratory findings would help determine the stage and severity of the infection.</p> <p>3. <b>**Vaccination**</b>: Additionally, a positive result could be due to prior vaccination against hepatitis A. Vaccination stimulates the production of antibodies against the virus, providing immunity without causing illness.</p> <p>To confirm whether the positive result indicates a current infection, it's essential to consider the individual's clinical symptoms, medical history, and possibly conduct further tests such as liver function tests or viral RNA detection. Consulting with a healthcare provider who can interpret the results in the context of the individual's overall health is crucial for accurate diagnosis and appropriate management.</p>                                                                                           |
| 21. Does a positive hepatitis C virus antibody test definitely mean one has hepatitis C?                                              | <p>A positive hepatitis C virus (HCV) antibody test indicates exposure to the virus at some point in the past. However, it doesn't necessarily mean that the individual currently has an active hepatitis C infection.</p> <p>To confirm active infection, further testing is required. This usually involves a nucleic acid test (NAT), such as polymerase chain reaction (PCR), to detect the presence of the actual virus in the bloodstream. If the NAT is positive, it confirms active hepatitis C infection. If it's negative, it suggests either past exposure without current infection or a very early stage of infection before the virus has replicated enough to be detectable.</p> <p>It's essential to follow up with a healthcare provider for proper interpretation of test results and to determine the appropriate course of action, whether it be monitoring, further testing, or treatment.</p> |
| 22. How should the results of the "hepatitis B panel" be interpreted? What does it mean if the hepatitis B core antibody is positive? | <p>Interpreting the results of a hepatitis B panel requires a comprehensive understanding of the various markers tested. The panel typically includes hepatitis B surface antigen (HBsAg), hepatitis B surface antibody (anti-HBs), hepatitis B core antibody (anti-HBc), and sometimes hepatitis B e antigen (HBeAg) and hepatitis B e antibody (anti-HBe).</p> <p>If the hepatitis B core antibody (anti-HBc) is positive, it indicates past or ongoing exposure to the hepatitis B virus (HBV). However, it does not differentiate between acute, chronic, or resolved infection. Here's a breakdown of what a positive anti-HBc result could mean:</p>                                                                                                                                                                                                                                                          |



|                                                                                               |                                                                                                                                                                                                                                                                                                                                                                                                                                                                                                                                                                                                                                                                                                                                                                                                                                                                                                                                                                                                                                                                                                                                                                                                                                                                                                                                                                                                          |
|-----------------------------------------------------------------------------------------------|----------------------------------------------------------------------------------------------------------------------------------------------------------------------------------------------------------------------------------------------------------------------------------------------------------------------------------------------------------------------------------------------------------------------------------------------------------------------------------------------------------------------------------------------------------------------------------------------------------------------------------------------------------------------------------------------------------------------------------------------------------------------------------------------------------------------------------------------------------------------------------------------------------------------------------------------------------------------------------------------------------------------------------------------------------------------------------------------------------------------------------------------------------------------------------------------------------------------------------------------------------------------------------------------------------------------------------------------------------------------------------------------------------|
|                                                                                               | <p>1. <b>Past Infection</b>: A positive anti-HBc result may indicate that the individual has been exposed to the hepatitis B virus in the past. This could mean either a resolved infection (with or without recovery) or chronic infection that has been cleared by the immune system.</p> <p>2. <b>Chronic Infection</b>: In some cases, a positive anti-HBc result may suggest chronic hepatitis B infection, especially if other markers such as HBsAg or HBeAg are also positive.</p> <p>3. <b>Vaccination</b>: It's important to consider whether the individual has received the hepatitis B vaccine. Vaccination can also result in a positive anti-HBc, but in this case, other markers like anti-HBs should also be positive.</p> <p>4. <b>Window Period</b>: During the acute phase of HBV infection, there may be a "window period" where HBsAg is not yet detectable but anti-HBc is positive. This phase typically occurs before HBsAg becomes detectable and can indicate acute infection.</p> <p>Interpretation of the hepatitis B panel should always be done in conjunction with the individual's medical history, clinical presentation, and additional laboratory tests if needed. If there are concerns about hepatitis B infection, further evaluation by a healthcare provider, including additional serological testing and possibly liver function tests, may be warranted.</p> |
| <p>23. Under what circumstances should screening for hepatitis C antibodies be performed?</p> | <p>Screening for hepatitis C antibodies should be considered under the following circumstances:</p> <p>1. Routine Health Checkups: It's often included in routine blood tests as part of regular health checkups, especially for individuals at higher risk.</p> <p>2. History of Intravenous Drug Use: Individuals with a history of intravenous drug use, even if it was only once or many years ago, should be screened due to the higher risk of hepatitis C transmission through needle sharing.</p>                                                                                                                                                                                                                                                                                                                                                                                                                                                                                                                                                                                                                                                                                                                                                                                                                                                                                                |

|                                                                        |                                                                                                                                                                                                                                                                                                                                                                                                                                                                                                                                                                                                                                                                                                                                                                                                                                                                                                                                                                                                                                                                                                                                                                                                                                                                                                                                                                                                                                                                                                                                                                                                                                                                |
|------------------------------------------------------------------------|----------------------------------------------------------------------------------------------------------------------------------------------------------------------------------------------------------------------------------------------------------------------------------------------------------------------------------------------------------------------------------------------------------------------------------------------------------------------------------------------------------------------------------------------------------------------------------------------------------------------------------------------------------------------------------------------------------------------------------------------------------------------------------------------------------------------------------------------------------------------------------------------------------------------------------------------------------------------------------------------------------------------------------------------------------------------------------------------------------------------------------------------------------------------------------------------------------------------------------------------------------------------------------------------------------------------------------------------------------------------------------------------------------------------------------------------------------------------------------------------------------------------------------------------------------------------------------------------------------------------------------------------------------------|
|                                                                        | <p>3. History of Blood Transfusions or Organ Transplants Before 1992: Before 1992, blood screening for hepatitis C wasn't as rigorous as it is today. People who received blood transfusions or organ transplants before this time should be screened, as there's a risk they may have been exposed to the virus.</p> <p>4. Healthcare Workers: Healthcare workers who have been exposed to blood or needle stick injuries are at risk and may benefit from screening.</p> <p>5. Baby Boomers (born between 1945 and 1965): The CDC recommends one-time screening for all individuals born between 1945 and 1965, as this group has a higher prevalence of hepatitis C compared to other age groups.</p> <p>6. Individuals with HIV: HIV-positive individuals have a higher risk of hepatitis C co-infection and should be screened for hepatitis C antibodies.</p> <p>7. Individuals with Elevated Liver Enzymes: If routine blood tests show elevated liver enzymes, screening for hepatitis C antibodies may be recommended as part of the diagnostic workup for liver disease.</p> <p>8. Sexual Partners of Hepatitis C Positive Individuals: Although the risk of sexual transmission of hepatitis C is low, it is still possible. Screening may be considered for sexual partners of individuals who are known to be hepatitis C positive.</p> <p>It's important to note that screening for hepatitis C antibodies is just the first step. If antibodies are detected, further testing, such as a viral RNA test, is needed to confirm active infection. Early detection and treatment can help prevent complications and transmission of the virus.</p> |
| 24. Under what circumstances should chronic hepatitis E be considered? | Chronic hepatitis E, while less common than acute hepatitis E, should be considered in individuals who present with persistent elevation of liver enzymes and symptoms suggestive of chronic liver disease, such as fatigue, jaundice, abdominal discomfort, or hepatomegaly.                                                                                                                                                                                                                                                                                                                                                                                                                                                                                                                                                                                                                                                                                                                                                                                                                                                                                                                                                                                                                                                                                                                                                                                                                                                                                                                                                                                  |

|                                                               |                                                                                                                                                                                                                                                                                                                                                                                                                                                                                                                                                                                                                                                                                                                                                                                                                                                                                                                                                                                                                                                                                                                                                                                                                                                                   |
|---------------------------------------------------------------|-------------------------------------------------------------------------------------------------------------------------------------------------------------------------------------------------------------------------------------------------------------------------------------------------------------------------------------------------------------------------------------------------------------------------------------------------------------------------------------------------------------------------------------------------------------------------------------------------------------------------------------------------------------------------------------------------------------------------------------------------------------------------------------------------------------------------------------------------------------------------------------------------------------------------------------------------------------------------------------------------------------------------------------------------------------------------------------------------------------------------------------------------------------------------------------------------------------------------------------------------------------------|
|                                                               | <p>Chronic hepatitis E is more frequently observed in immunocompromised individuals, such as solid organ transplant recipients, those with hematological malignancies, or patients undergoing chemotherapy. It can also occur in patients with pre-existing liver conditions, such as cirrhosis or chronic hepatitis B or C infection.</p> <p>In regions where hepatitis E is endemic, individuals with chronic liver disease of unclear etiology should be evaluated for chronic hepatitis E, especially if they have a history of travel to endemic areas or consumption of contaminated water or undercooked pork.</p> <p>If chronic hepatitis E is suspected, diagnostic testing should include serological assays for hepatitis E virus (HEV) antibodies and HEV RNA PCR to confirm active infection. Liver biopsy may also be considered to assess the degree of liver damage and to rule out other causes of chronic liver disease.</p> <p>Management of chronic hepatitis E often involves reducing immunosuppression in immunocompromised patients, if possible, and administering antiviral therapy such as ribavirin. Close monitoring of liver function and viral load is essential to assess treatment response and prevent disease progression.</p> |
| 25. What tests can definitively diagnose chronic hepatitis E? | <p>Diagnosing chronic hepatitis E can be challenging because it often presents with non-specific symptoms and may mimic other liver conditions. However, there are several tests that can help in making a definitive diagnosis:</p> <ol style="list-style-type: none"> <li>1. <b>Serology Tests</b>: These tests detect specific antibodies against hepatitis E virus (HEV) in the blood. Chronic hepatitis E is confirmed if anti-HEV IgM antibodies persist for more than six months. IgG antibodies against HEV are also indicative of past or ongoing infection.</li> <li>2. <b>HEV RNA Detection</b>: Polymerase chain reaction (PCR) tests can detect the genetic material of the hepatitis E virus in blood or stool samples. The presence of HEV RNA in the blood confirms active viral replication, indicating chronic infection.</li> </ol>                                                                                                                                                                                                                                                                                                                                                                                                            |

|                                                                                 |                                                                                                                                                                                                                                                                                                                                                                                                                                                                                                                                                                                                                                                                                                                                                                                                                                                                                                   |
|---------------------------------------------------------------------------------|---------------------------------------------------------------------------------------------------------------------------------------------------------------------------------------------------------------------------------------------------------------------------------------------------------------------------------------------------------------------------------------------------------------------------------------------------------------------------------------------------------------------------------------------------------------------------------------------------------------------------------------------------------------------------------------------------------------------------------------------------------------------------------------------------------------------------------------------------------------------------------------------------|
|                                                                                 | <p>3. <b>**Liver Function Tests (LFTs)**:</b> These tests measure levels of enzymes and proteins in the blood that indicate liver damage. While not specific to hepatitis E, abnormalities in LFTs can suggest liver inflammation and help monitor disease progression.</p> <p>4. <b>**Liver Biopsy**:</b> In some cases, a liver biopsy may be performed to assess the extent of liver damage and inflammation caused by chronic hepatitis E. This involves obtaining a small sample of liver tissue for microscopic examination.</p> <p>Combining the results of these tests can provide a definitive diagnosis of chronic hepatitis E and help guide appropriate management and treatment strategies. It's important for individuals with suspected hepatitis E to consult a healthcare professional for proper evaluation and diagnosis.</p>                                                  |
| <b>Topic: Prevention and Treatment</b>                                          |                                                                                                                                                                                                                                                                                                                                                                                                                                                                                                                                                                                                                                                                                                                                                                                                                                                                                                   |
| 26. If someone in the family has viral hepatitis, how should others prevent it? | <p>Preventing the spread of viral hepatitis within a family is crucial. Here are some steps others can take to prevent contracting the virus:</p> <p>1. <b>**Vaccination**:</b> Ensure that all household members are vaccinated against hepatitis A and B. This is the most effective way to prevent these types of viral hepatitis.</p> <p>2. <b>**Practice good hygiene**:</b> Encourage frequent handwashing, especially after using the bathroom and before handling food. Avoid sharing personal items such as toothbrushes, razors, or needles.</p> <p>3. <b>**Be cautious with food and water**:</b> Hepatitis A can be transmitted through contaminated food or water. Ensure that food is cooked thoroughly, and drink only clean, safe water.</p> <p>4. <b>**Practice safe sex**:</b> Hepatitis B and C can be transmitted through sexual contact. Encourage the use of condoms to</p> |

|                                          |                                                                                                                                                                                                                                                                                                                                                                                                                                                                                                                                                                                                                                                                                                                                                                                                                                                                                                                                                                                                                                                                                                                                   |
|------------------------------------------|-----------------------------------------------------------------------------------------------------------------------------------------------------------------------------------------------------------------------------------------------------------------------------------------------------------------------------------------------------------------------------------------------------------------------------------------------------------------------------------------------------------------------------------------------------------------------------------------------------------------------------------------------------------------------------------------------------------------------------------------------------------------------------------------------------------------------------------------------------------------------------------------------------------------------------------------------------------------------------------------------------------------------------------------------------------------------------------------------------------------------------------|
|                                          | <p>reduce the risk of transmission.</p> <p>5. <b>**Avoid sharing needles**</b>: If anyone in the family uses needles for medical purposes or recreational drugs, ensure they use clean needles and do not share them with others.</p> <p>6. <b>**Seek medical advice**</b>: If someone in the family has been diagnosed with viral hepatitis, they should follow their healthcare provider's advice closely and take any prescribed medications as directed. Additionally, they should avoid donating blood, plasma, organs, or sperm until cleared by a healthcare provider.</p> <p>7. <b>**Be aware of symptoms**</b>: Educate family members about the symptoms of viral hepatitis, such as jaundice, fatigue, nausea, and abdominal pain. Encourage anyone experiencing these symptoms to seek medical attention promptly.</p> <p>By following these preventive measures, other family members can significantly reduce their risk of contracting viral hepatitis. If anyone has concerns or questions about preventing hepatitis within their family, they should consult a healthcare provider for personalized advice.</p> |
| 27. What harm can viral hepatitis cause? | <p>Viral hepatitis, regardless of the specific virus causing it (such as hepatitis A, B, C, D, or E), can lead to various harmful effects on the liver and overall health. Here's a breakdown of the potential harms:</p> <p>1. <b>Liver Damage</b>: Hepatitis viruses primarily target the liver, leading to inflammation. Chronic inflammation can cause progressive damage to liver cells over time, leading to conditions like cirrhosis (scarring of the liver tissue), which can eventually result in liver failure.</p> <p>2. <b>Liver Cancer</b>: Chronic hepatitis infections, particularly hepatitis B and C, significantly increase the risk of developing liver cancer (hepatocellular carcinoma). The ongoing inflammation and damage to liver cells create an environment conducive to the development of cancerous growths.</p>                                                                                                                                                                                                                                                                                    |

|                                                                                                                                                                       |                                                                                                                                                                                                                                                                                                                                                                                                                                                                                                                                                                                                                                                                                                                                                                                                                                                                                                                                                                                                                                                                                                                                                                                                                                                                                                                                                                                                                                                                                                                                                                                                                                                       |
|-----------------------------------------------------------------------------------------------------------------------------------------------------------------------|-------------------------------------------------------------------------------------------------------------------------------------------------------------------------------------------------------------------------------------------------------------------------------------------------------------------------------------------------------------------------------------------------------------------------------------------------------------------------------------------------------------------------------------------------------------------------------------------------------------------------------------------------------------------------------------------------------------------------------------------------------------------------------------------------------------------------------------------------------------------------------------------------------------------------------------------------------------------------------------------------------------------------------------------------------------------------------------------------------------------------------------------------------------------------------------------------------------------------------------------------------------------------------------------------------------------------------------------------------------------------------------------------------------------------------------------------------------------------------------------------------------------------------------------------------------------------------------------------------------------------------------------------------|
|                                                                                                                                                                       | <p>3. Fulminant Hepatitis: In some cases, hepatitis infections can cause acute liver failure, a condition known as fulminant hepatitis. This is a medical emergency requiring immediate intervention, as it can lead to life-threatening complications such as hepatic encephalopathy and multiple organ failure.</p> <p>4. Transmission to Others: Viral hepatitis is contagious and can be spread through various means, including contaminated food or water (hepatitis A and E), blood-to-blood contact (hepatitis B, C, and D), and sexual contact or childbirth (hepatitis B). This means infected individuals can unknowingly transmit the virus to others, further spreading the infection.</p> <p>5. Extrahepatic Manifestations: Some hepatitis viruses can also affect organs and systems outside the liver. For example, hepatitis B and C infections are associated with extrahepatic manifestations such as kidney disease, skin disorders, and autoimmune conditions.</p> <p>6. Chronic Health Problems: Chronic hepatitis infections, particularly hepatitis B and C, can lead to long-term health problems even in individuals who do not develop cirrhosis or liver cancer. These may include fatigue, joint pain, cognitive issues, and increased risk of cardiovascular disease.</p> <p>Overall, the harm caused by viral hepatitis can range from mild and manageable symptoms to severe liver damage and life-threatening complications. Early detection, appropriate treatment, and preventive measures such as vaccination are crucial for reducing the impact of viral hepatitis on individual health and public health.</p> |
| 28. If a family member has hepatitis B, how often should others check for hepatitis B surface antibodies? Under what circumstances should vaccinations be considered? | <p>For individuals who have close contact with a family member diagnosed with hepatitis B, it's essential to understand their vaccination status and immunity. Checking for hepatitis B surface antibodies can help determine if someone has developed immunity either through vaccination or past infection.</p> <p>Generally, individuals who are at risk of exposure, such as family members of someone with hepatitis B, should consider testing for hepatitis B surface antibodies initially to assess their immunity status. If they are not immune,</p>                                                                                                                                                                                                                                                                                                                                                                                                                                                                                                                                                                                                                                                                                                                                                                                                                                                                                                                                                                                                                                                                                        |

|                                                                        |                                                                                                                                                                                                                                                                                                                                                                                                                                                                                                                                                                                                                                                                                                                                                                                                                                                                                                                                                                                                                                  |
|------------------------------------------------------------------------|----------------------------------------------------------------------------------------------------------------------------------------------------------------------------------------------------------------------------------------------------------------------------------------------------------------------------------------------------------------------------------------------------------------------------------------------------------------------------------------------------------------------------------------------------------------------------------------------------------------------------------------------------------------------------------------------------------------------------------------------------------------------------------------------------------------------------------------------------------------------------------------------------------------------------------------------------------------------------------------------------------------------------------|
|                                                                        | <p>vaccination should be strongly considered.</p> <p>As for the frequency of checking hepatitis B surface antibodies, it depends on various factors such as the individual's vaccination history, risk of exposure, and any changes in their health status. Typically, a single test may be sufficient to determine immunity after vaccination. However, in certain situations where there is ongoing risk of exposure or if the individual's immune status may be compromised (such as due to certain medical conditions or medications), periodic testing may be recommended.</p> <p>It's important for individuals to consult with their healthcare provider to assess their specific situation and determine the appropriate course of action regarding vaccination and testing for hepatitis B surface antibodies.</p>                                                                                                                                                                                                      |
| 29. If I have viral hepatitis, what dietary precautions should I take? | <p>If you have viral hepatitis, particularly hepatitis A or B, it's important to follow a healthy diet to support your liver function and overall health. Here are some dietary precautions and recommendations:</p> <ol style="list-style-type: none"> <li>1. <b>**Stay hydrated**</b>: Drink plenty of water throughout the day to help your liver function properly and flush out toxins.</li> <li>2. <b>**Limit alcohol**</b>: Alcohol can worsen liver damage, so it's crucial to avoid or limit alcohol consumption.</li> <li>3. <b>**Avoid fatty and fried foods**</b>: These foods can be harder for your liver to process, so it's best to minimize your intake of fatty and fried foods.</li> <li>4. <b>**Eat small, frequent meals**</b>: Instead of large meals, try to eat smaller meals throughout the day to reduce the burden on your liver.</li> <li>5. <b>**Choose lean protein sources**</b>: Opt for lean protein sources such as chicken, fish, tofu, beans, and legumes instead of fatty meats.</li> </ol> |

|                                                                               |                                                                                                                                                                                                                                                                                                                                                                                                                                                                                                                                                                                                                                                                                                                                                                                                                                                                                                                                                                                                                                                                                                                                                                                                                                                                                                                   |
|-------------------------------------------------------------------------------|-------------------------------------------------------------------------------------------------------------------------------------------------------------------------------------------------------------------------------------------------------------------------------------------------------------------------------------------------------------------------------------------------------------------------------------------------------------------------------------------------------------------------------------------------------------------------------------------------------------------------------------------------------------------------------------------------------------------------------------------------------------------------------------------------------------------------------------------------------------------------------------------------------------------------------------------------------------------------------------------------------------------------------------------------------------------------------------------------------------------------------------------------------------------------------------------------------------------------------------------------------------------------------------------------------------------|
|                                                                               | <p>6. <b>**Include fruits and vegetables**</b>: Aim to include a variety of fruits and vegetables in your diet, as they are rich in vitamins, minerals, and antioxidants that support liver health.</p> <p>7. <b>**Limit sodium intake**</b>: Too much sodium can lead to fluid retention and swelling, so try to limit your intake of salty foods.</p> <p>8. <b>**Consider supplements**</b>: In some cases, your doctor may recommend supplements such as vitamin B complex, vitamin D, and omega-3 fatty acids to support liver health. However, always consult with your healthcare provider before taking any supplements.</p> <p>9. <b>**Avoid raw or undercooked seafood**</b>: If you have hepatitis A, it's important to avoid raw or undercooked seafood, as it can increase the risk of infection.</p> <p>10. <b>**Practice good food hygiene**</b>: To prevent further spread of viral hepatitis, make sure to practice good food hygiene, such as washing your hands before and after preparing food, thoroughly washing fruits and vegetables, and avoiding cross-contamination between raw and cooked foods.</p> <p>Remember to consult with your healthcare provider or a registered dietitian for personalized dietary recommendations based on your specific condition and medical history.</p> |
| 30. I have chronic hepatitis B; what should I pay attention to in daily life? | <p>Living with chronic hepatitis B requires some lifestyle adjustments to manage the condition and protect your liver health. Here are some important things to consider:</p> <p>1. <b>**Healthy Diet**</b>: Maintain a balanced and nutritious diet. This means consuming plenty of fruits, vegetables, whole grains, and lean proteins. Avoid foods high in saturated fats, sugar, and salt.</p> <p>2. <b>**Limit Alcohol Consumption**</b>: Alcohol can worsen liver damage, so it's essential to limit or completely avoid alcohol.</p>                                                                                                                                                                                                                                                                                                                                                                                                                                                                                                                                                                                                                                                                                                                                                                       |



|  |                                                                                                                                                                                                                                                                                                                                                                                                                                                                                                                                                                                                                                                                                                                                                                                                                                                                                                                                                                                                                                                                                                                                                                                                                                                                                                                                                                                                                                                                                                                                                                                                                                                                                                                                                                                                          |
|--|----------------------------------------------------------------------------------------------------------------------------------------------------------------------------------------------------------------------------------------------------------------------------------------------------------------------------------------------------------------------------------------------------------------------------------------------------------------------------------------------------------------------------------------------------------------------------------------------------------------------------------------------------------------------------------------------------------------------------------------------------------------------------------------------------------------------------------------------------------------------------------------------------------------------------------------------------------------------------------------------------------------------------------------------------------------------------------------------------------------------------------------------------------------------------------------------------------------------------------------------------------------------------------------------------------------------------------------------------------------------------------------------------------------------------------------------------------------------------------------------------------------------------------------------------------------------------------------------------------------------------------------------------------------------------------------------------------------------------------------------------------------------------------------------------------|
|  | <p>consumption if you have hepatitis B.</p> <p>3. <b>**Stay Hydrated:**</b> Drink plenty of water throughout the day to support overall health and liver function.</p> <p>4. <b>**Regular Exercise:**</b> Engage in regular physical activity to maintain a healthy weight and improve overall well-being. Exercise can also help reduce the risk of fatty liver disease.</p> <p>5. <b>**Avoid Smoking:**</b> Smoking can exacerbate liver damage and increase the risk of liver cancer. If you smoke, consider quitting or seek support to quit.</p> <p>6. <b>**Practice Safe Sex:**</b> Hepatitis B is spread through blood and bodily fluids, including semen and vaginal fluids. Practice safe sex by using condoms to prevent the spread of the virus to others.</p> <p>7. <b>**Get Vaccinated:**</b> Ensure that your close contacts, including family members and sexual partners, are vaccinated against hepatitis B to prevent transmission.</p> <p>8. <b>**Regular Medical Check-ups:**</b> Attend regular appointments with your healthcare provider for monitoring and management of your condition. This may include blood tests to assess liver function and screenings for liver cancer.</p> <p>9. <b>**Medication Adherence:**</b> If you're prescribed medication for hepatitis B, take it as directed by your healthcare provider. Adhering to your treatment plan can help control the virus and reduce the risk of liver damage.</p> <p>10. <b>**Avoid Sharing Personal Items:**</b> Avoid sharing personal items such as razors, toothbrushes, or anything that may come into contact with blood, as this can potentially spread the virus.</p> <p>11. <b>**Be Mindful of Liver Toxicity:**</b> Some medications, including over-the-counter and prescription drugs, as well as</p> |
|--|----------------------------------------------------------------------------------------------------------------------------------------------------------------------------------------------------------------------------------------------------------------------------------------------------------------------------------------------------------------------------------------------------------------------------------------------------------------------------------------------------------------------------------------------------------------------------------------------------------------------------------------------------------------------------------------------------------------------------------------------------------------------------------------------------------------------------------------------------------------------------------------------------------------------------------------------------------------------------------------------------------------------------------------------------------------------------------------------------------------------------------------------------------------------------------------------------------------------------------------------------------------------------------------------------------------------------------------------------------------------------------------------------------------------------------------------------------------------------------------------------------------------------------------------------------------------------------------------------------------------------------------------------------------------------------------------------------------------------------------------------------------------------------------------------------|

|                                                                                                               |                                                                                                                                                                                                                                                                                                                                                                                                                                                                                                                                                                                                                                                                                                                                                                                                                                                                                                                                                                                                                                                                                                                                                                                                                                                                                                                                                                                                                                                                                                                         |
|---------------------------------------------------------------------------------------------------------------|-------------------------------------------------------------------------------------------------------------------------------------------------------------------------------------------------------------------------------------------------------------------------------------------------------------------------------------------------------------------------------------------------------------------------------------------------------------------------------------------------------------------------------------------------------------------------------------------------------------------------------------------------------------------------------------------------------------------------------------------------------------------------------------------------------------------------------------------------------------------------------------------------------------------------------------------------------------------------------------------------------------------------------------------------------------------------------------------------------------------------------------------------------------------------------------------------------------------------------------------------------------------------------------------------------------------------------------------------------------------------------------------------------------------------------------------------------------------------------------------------------------------------|
|                                                                                                               | <p>herbal supplements, can be harmful to the liver. Always consult with your healthcare provider before taking any new medications or supplements.</p> <p>12. <b>**Manage Stress:**</b> Chronic hepatitis B can cause emotional stress. Practice stress-reduction techniques such as mindfulness, meditation, yoga, or seeking support from a counselor or support group.</p> <p>By following these guidelines and working closely with your healthcare provider, you can better manage your chronic hepatitis B and maintain your liver health.</p>                                                                                                                                                                                                                                                                                                                                                                                                                                                                                                                                                                                                                                                                                                                                                                                                                                                                                                                                                                    |
| 31. I have chronic hepatitis B and it's controlled with medication; what indicators should I regularly check? | <p>For someone with chronic hepatitis B, it's essential to monitor several indicators regularly to ensure the condition is well-managed and to detect any potential complications early. Here are some key indicators you should regularly check:</p> <ol style="list-style-type: none"> <li>1. <b>Liver Function Tests (LFTs):</b> These include tests such as alanine aminotransferase (ALT), aspartate aminotransferase (AST), alkaline phosphatase (ALP), and bilirubin levels. Elevated ALT and AST levels can indicate liver inflammation or damage.</li> <li>2. <b>Viral Load:</b> Monitoring your hepatitis B viral load helps assess how active the virus is in your body. It measures the amount of HBV DNA in your blood. A high viral load may indicate that the virus is replicating actively.</li> <li>3. <b>Hepatitis B e Antigen (HBeAg) and Hepatitis B e Antibody (HBeAb):</b> These markers indicate whether the hepatitis B virus is actively replicating (HBeAg positive) or if the replication has slowed down (HBeAg negative). The presence of HBeAg may indicate a higher risk of liver damage and progression of the disease.</li> <li>4. <b>Hepatitis B Surface Antigen (HBsAg):</b> This marker indicates whether you are currently infected with the hepatitis B virus. A positive HBsAg test means you have a chronic hepatitis B infection.</li> <li>5. <b>Liver Imaging:</b> Periodic liver imaging studies such as ultrasound, CT scans, or MRI scans may be recommended to</li> </ol> |

|                                                                                                                          |                                                                                                                                                                                                                                                                                                                                                                                                                                                                                                                                                                                                                                                                                                                                                                                                                                                                                                                                                                                                                                                                                                                                                                                                                                                                                                                                                                                                                                                                        |
|--------------------------------------------------------------------------------------------------------------------------|------------------------------------------------------------------------------------------------------------------------------------------------------------------------------------------------------------------------------------------------------------------------------------------------------------------------------------------------------------------------------------------------------------------------------------------------------------------------------------------------------------------------------------------------------------------------------------------------------------------------------------------------------------------------------------------------------------------------------------------------------------------------------------------------------------------------------------------------------------------------------------------------------------------------------------------------------------------------------------------------------------------------------------------------------------------------------------------------------------------------------------------------------------------------------------------------------------------------------------------------------------------------------------------------------------------------------------------------------------------------------------------------------------------------------------------------------------------------|
|                                                                                                                          | <p>assess liver health and detect any signs of liver damage, such as cirrhosis or liver cancer.</p> <p>6. Liver Biopsy: In some cases, your healthcare provider may recommend a liver biopsy to assess the degree of liver inflammation and fibrosis. This invasive procedure involves taking a small sample of liver tissue for analysis under a microscope.</p> <p>It's important to discuss with your healthcare provider how often you should undergo these tests based on your individual health status and the stage of your hepatitis B infection. Regular monitoring can help ensure that your condition remains well-controlled and that any changes or complications are detected early for timely intervention.</p>                                                                                                                                                                                                                                                                                                                                                                                                                                                                                                                                                                                                                                                                                                                                         |
| 32. I have chronic hepatitis B and it's controlled with medication; how often should I visit the hospital for follow-up? | <p>For chronic hepatitis B, regular follow-up visits with your healthcare provider are crucial to monitor your condition and ensure that your treatment plan is effective. Typically, the frequency of follow-up visits depends on several factors including the stage of your hepatitis B infection, the severity of liver damage, the type of treatment you're receiving, and any other medical conditions you may have.</p> <p>In general, patients with chronic hepatitis B may be advised to visit their healthcare provider every 3 to 6 months for routine check-ups. During these visits, your healthcare provider will likely conduct various tests including liver function tests, viral load tests, and possibly imaging studies to assess the status of your liver and the effectiveness of your treatment.</p> <p>However, it's important to note that individualized care is essential in managing chronic hepatitis B. Your healthcare provider will tailor the frequency of your follow-up visits based on your specific needs and response to treatment. If you have any concerns or experience any new symptoms between visits, don't hesitate to contact your healthcare provider for guidance.</p> <p>Additionally, maintaining open communication with your healthcare team and adhering to your treatment plan are key factors in managing chronic hepatitis B effectively. By working closely with your healthcare provider, you can better</p> |

|                                                                                                                                    |                                                                                                                                                                                                                                                                                                                                                                                                                                                                                                                                                                                                                                                                                                                                                                                                                                                                                                                                                                                                                                                                                                                                                                                                                                                                                                                                                                                                                                                                                                                                                                                                                                                                                                                                                                                                                                                                                            |
|------------------------------------------------------------------------------------------------------------------------------------|--------------------------------------------------------------------------------------------------------------------------------------------------------------------------------------------------------------------------------------------------------------------------------------------------------------------------------------------------------------------------------------------------------------------------------------------------------------------------------------------------------------------------------------------------------------------------------------------------------------------------------------------------------------------------------------------------------------------------------------------------------------------------------------------------------------------------------------------------------------------------------------------------------------------------------------------------------------------------------------------------------------------------------------------------------------------------------------------------------------------------------------------------------------------------------------------------------------------------------------------------------------------------------------------------------------------------------------------------------------------------------------------------------------------------------------------------------------------------------------------------------------------------------------------------------------------------------------------------------------------------------------------------------------------------------------------------------------------------------------------------------------------------------------------------------------------------------------------------------------------------------------------|
|                                                                                                                                    | manage your condition and minimize the risk of complications associated with hepatitis B.                                                                                                                                                                                                                                                                                                                                                                                                                                                                                                                                                                                                                                                                                                                                                                                                                                                                                                                                                                                                                                                                                                                                                                                                                                                                                                                                                                                                                                                                                                                                                                                                                                                                                                                                                                                                  |
| 33. What are the common antiviral drugs for chronic hepatitis B?                                                                   | <p>For chronic hepatitis B, the primary antiviral drugs used are nucleoside/nucleotide analogues (NAs) and interferon-based therapies. Here are some common antiviral drugs used for treating chronic hepatitis B:</p> <p>1. <b>Nucleoside Analogues (NAs)</b>:</p> <ul style="list-style-type: none"> <li>- <b>Entecavir (Baraclude)</b>: It's a potent antiviral drug that inhibits viral replication by targeting the reverse transcriptase enzyme of the hepatitis B virus (HBV).</li> <li>- <b>Tenofovir Disoproxil Fumarate (TDF)</b>: This drug works similarly to entecavir and is highly effective in suppressing HBV replication.</li> <li>- <b>Tenofovir Alafenamide (TAF)</b>: A newer formulation of tenofovir that has been shown to have similar efficacy to TDF but with potentially fewer side effects on renal and bone health.</li> <li>- <b>Lamivudine (Epivir-HBV)</b>: Though less commonly used due to lower potency and higher rates of viral resistance, lamivudine may still be used in certain cases, particularly in resource-limited settings.</li> </ul> <p>2. <b>Interferon-Based Therapies</b>:</p> <ul style="list-style-type: none"> <li>- <b>Pegylated Interferon-alpha (Peg-IFN<math>\alpha</math>)</b>: It's administered as a subcutaneous injection and works by modulating the immune response to suppress viral replication and enhance viral clearance. It's usually given for a finite duration, typically 48 weeks.</li> </ul> <p>These antiviral drugs are prescribed based on various factors such as the patient's HBV DNA levels, liver function tests, presence of liver cirrhosis, and any previous treatment history. It's crucial for patients with chronic hepatitis B to undergo regular monitoring to assess treatment response, detect any signs of drug resistance, and evaluate liver health to prevent disease progression.</p> |
| 34. I have chronic hepatitis B and am using long-acting interferon treatment; what are the side effects of long-acting interferon? | Long-acting interferon treatment can indeed be effective for chronic hepatitis B, but like any medication, it can also come with potential side effects. Here are some common ones to be aware of:                                                                                                                                                                                                                                                                                                                                                                                                                                                                                                                                                                                                                                                                                                                                                                                                                                                                                                                                                                                                                                                                                                                                                                                                                                                                                                                                                                                                                                                                                                                                                                                                                                                                                         |

1. **Flu-like symptoms**: Many people experience flu-like symptoms such as fever, chills, muscle aches, and fatigue, especially when they first start treatment or after each injection.
  2. **Fatigue**: Feeling tired or fatigued is a common side effect of interferon treatment.
  3. **Injection site reactions**: You may experience pain, redness, or swelling at the injection site.
  4. **Nausea and vomiting**: Some individuals may feel nauseous or experience vomiting after taking interferon.
  5. **Depression or mood changes**: Interferon treatment can sometimes affect mood, leading to symptoms of depression, irritability, or anxiety.
  6. **Thyroid problems**: Interferon can affect the function of the thyroid gland, leading to symptoms such as weight changes, fatigue, and mood swings.
  7. **Blood count changes**: Interferon can cause changes in blood cell counts, including a decrease in white blood cells (which can increase the risk of infections), red blood cells (which can lead to anemia), and platelets (which can affect blood clotting).
  8. **Liver problems**: Although interferon is used to treat hepatitis B, in some cases, it can cause liver inflammation or liver enzyme abnormalities.
  9. **Hair thinning or loss**: Some people may experience hair thinning or hair loss while on interferon treatment.
- It's important to note that not everyone will experience these side effects, and some individuals may experience them to a greater or lesser degree than others. If you are experiencing any side effects or have concerns about your treatment,

|                                                                                                                                                                                                           |                                                                                                                                                                                                                                                                                                                                                                                                                                                                                                                                                                                                                                                                                                                                                                                                                                                                                                                                                                                                                                                                                                                                                                                                                                                                                                                                                                                                                                                                                                                                                                                                                                                                                                                                                                         |
|-----------------------------------------------------------------------------------------------------------------------------------------------------------------------------------------------------------|-------------------------------------------------------------------------------------------------------------------------------------------------------------------------------------------------------------------------------------------------------------------------------------------------------------------------------------------------------------------------------------------------------------------------------------------------------------------------------------------------------------------------------------------------------------------------------------------------------------------------------------------------------------------------------------------------------------------------------------------------------------------------------------------------------------------------------------------------------------------------------------------------------------------------------------------------------------------------------------------------------------------------------------------------------------------------------------------------------------------------------------------------------------------------------------------------------------------------------------------------------------------------------------------------------------------------------------------------------------------------------------------------------------------------------------------------------------------------------------------------------------------------------------------------------------------------------------------------------------------------------------------------------------------------------------------------------------------------------------------------------------------------|
|                                                                                                                                                                                                           | <p>it's essential to discuss them with your healthcare provider. They can provide guidance on managing side effects and may adjust your treatment plan if necessary.</p>                                                                                                                                                                                                                                                                                                                                                                                                                                                                                                                                                                                                                                                                                                                                                                                                                                                                                                                                                                                                                                                                                                                                                                                                                                                                                                                                                                                                                                                                                                                                                                                                |
| <p>35. I have chronic hepatitis B and am using long-acting interferon treatment; what discomfort should I be aware of in my body? Under what circumstances should I seek immediate medical attention?</p> | <p>As someone with chronic hepatitis B undergoing long-acting interferon treatment, it's essential to be mindful of potential side effects and complications. Interferon therapy can cause various discomforts, and while most are mild and manageable, some may require immediate medical attention.</p> <p>Common discomforts associated with interferon therapy include:</p> <ol style="list-style-type: none"> <li>1. <b>Flu-like symptoms</b>: These may include fever, chills, muscle aches, and fatigue. They often occur shortly after starting treatment or after each injection.</li> <li>2. <b>Injection site reactions</b>: You may experience redness, swelling, or pain at the injection site. These reactions are usually mild and resolve on their own.</li> <li>3. <b>Fatigue</b>: Interferon therapy can cause fatigue, which may affect your daily activities. It's essential to rest when needed and communicate any significant changes in fatigue levels to your healthcare provider.</li> <li>4. <b>Mood changes</b>: Some people may experience mood swings, irritability, or depression while on interferon therapy. It's crucial to discuss any changes in mood with your healthcare provider, as they can provide support and potentially adjust your treatment if necessary.</li> <li>5. <b>Blood abnormalities</b>: Interferon therapy can affect your blood cell counts, leading to anemia, leukopenia (low white blood cell count), or thrombocytopenia (low platelet count). Your healthcare provider will monitor your blood counts regularly to detect and manage any abnormalities.</li> <li>6. <b>Thyroid dysfunction</b>: Interferon therapy can impact thyroid function, leading to hypothyroidism or hyperthyroidism.</li> </ol> |

|                                                                                                                         |                                                                                                                                                                                                                                                                                                                                                                                                                                                                                                                                                                                                                                                                                                                                                                                                                                                                                                                                                                                                                                                                                                                                                                                                                                                                                                                                                                                                                                                                                                                                                                                                                                                                                                                                                                                                                            |
|-------------------------------------------------------------------------------------------------------------------------|----------------------------------------------------------------------------------------------------------------------------------------------------------------------------------------------------------------------------------------------------------------------------------------------------------------------------------------------------------------------------------------------------------------------------------------------------------------------------------------------------------------------------------------------------------------------------------------------------------------------------------------------------------------------------------------------------------------------------------------------------------------------------------------------------------------------------------------------------------------------------------------------------------------------------------------------------------------------------------------------------------------------------------------------------------------------------------------------------------------------------------------------------------------------------------------------------------------------------------------------------------------------------------------------------------------------------------------------------------------------------------------------------------------------------------------------------------------------------------------------------------------------------------------------------------------------------------------------------------------------------------------------------------------------------------------------------------------------------------------------------------------------------------------------------------------------------|
|                                                                                                                         | <p>Your healthcare provider may monitor your thyroid function with blood tests and adjust your treatment as needed.</p> <p>If you experience any of the following symptoms, you should seek immediate medical attention:</p> <ol style="list-style-type: none"> <li>1. <b>**Severe allergic reactions**</b>: Symptoms may include difficulty breathing, swelling of the face or throat, hives, or severe itching. These reactions require immediate medical attention and may necessitate discontinuation of interferon therapy.</li> <li>2. <b>**Severe depression or suicidal thoughts**</b>: If you experience persistent feelings of sadness, hopelessness, or thoughts of self-harm, it's essential to seek immediate help from a healthcare professional or emergency services.</li> <li>3. <b>**Severe fatigue or weakness**</b>: If you experience extreme fatigue or weakness that interferes with your ability to perform daily activities, it may indicate a more serious complication requiring medical evaluation.</li> <li>4. <b>**Uncontrolled bleeding or bruising**</b>: Interferon therapy can affect blood clotting, leading to increased bleeding or bruising. If you experience prolonged or unexplained bleeding, seek medical attention promptly.</li> <li>5. <b>**Severe abdominal pain or jaundice**</b>: These symptoms may indicate liver complications such as liver failure or hepatitis flare-up. Immediate medical evaluation is necessary to determine the cause and appropriate treatment.</li> </ol> <p>It's essential to communicate openly with your healthcare provider about any symptoms or concerns you may have during interferon therapy. They can provide guidance, support, and appropriate management to ensure the best possible outcome for your hepatitis B treatment.</p> |
| 36. I have chronic hepatitis B and am using long-acting interferon treatment; what indicators should I regularly check? | <p>As someone with chronic hepatitis B undergoing long-acting interferon treatment, it's crucial to monitor several indicators regularly to assess your response to treatment and ensure your overall health. Here are some key indicators you should regularly check:</p>                                                                                                                                                                                                                                                                                                                                                                                                                                                                                                                                                                                                                                                                                                                                                                                                                                                                                                                                                                                                                                                                                                                                                                                                                                                                                                                                                                                                                                                                                                                                                 |

1. **Liver Function Tests (LFTs):** These include measuring levels of enzymes such as alanine aminotransferase (ALT) and aspartate aminotransferase (AST), which can indicate liver inflammation and damage. Monitoring these levels helps assess the activity of the hepatitis B virus and the health of your liver.
2. **Viral Load:** Monitoring the amount of hepatitis B virus in your blood, known as viral load, is essential to evaluate the effectiveness of treatment. A decrease in viral load indicates a positive response to interferon therapy.
3. **HBsAg and HBeAg:** These are antigens produced by the hepatitis B virus. Monitoring changes in their levels can provide insights into the activity of the virus and your response to treatment. Clearance or seroconversion of these antigens may indicate a favorable treatment outcome.
4. **Complete Blood Count (CBC):** This test assesses various components of your blood, including red blood cells, white blood cells, and platelets. Interferon treatment may affect these blood cell counts, so regular monitoring can help detect any abnormalities.
5. **Thyroid Function Tests:** Long-acting interferon therapy can sometimes affect thyroid function, leading to conditions like hypothyroidism or hyperthyroidism. Monitoring thyroid hormone levels helps detect any thyroid-related complications early on.
6. **Kidney Function Tests:** Interferon treatment may also affect kidney function in some individuals. Regular monitoring of kidney function markers such as creatinine and blood urea nitrogen (BUN) can help detect any abnormalities.
7. **Physical Examination:** Regular physical examinations by your healthcare provider are essential for assessing your overall health, monitoring for any signs or symptoms of liver disease progression or interferon-related side effects,



|                                                                                      |                                                                                                                                                                                                                                                                                                                                                                                                                                                                                                                                                                                                                                                                                                                                                                                                                                                                                                                                                                                                                                                                                                                                                                                                                                                                                                                                                                                                                                                                                                                                                                                                              |
|--------------------------------------------------------------------------------------|--------------------------------------------------------------------------------------------------------------------------------------------------------------------------------------------------------------------------------------------------------------------------------------------------------------------------------------------------------------------------------------------------------------------------------------------------------------------------------------------------------------------------------------------------------------------------------------------------------------------------------------------------------------------------------------------------------------------------------------------------------------------------------------------------------------------------------------------------------------------------------------------------------------------------------------------------------------------------------------------------------------------------------------------------------------------------------------------------------------------------------------------------------------------------------------------------------------------------------------------------------------------------------------------------------------------------------------------------------------------------------------------------------------------------------------------------------------------------------------------------------------------------------------------------------------------------------------------------------------|
|                                                                                      | <p>and discussing any concerns you may have.</p> <p>It's important to follow your healthcare provider's recommendations regarding the frequency of these tests and any additional monitoring based on your individual health status and treatment response. Additionally, don't hesitate to discuss any questions or concerns you have about your treatment plan with your healthcare team.</p>                                                                                                                                                                                                                                                                                                                                                                                                                                                                                                                                                                                                                                                                                                                                                                                                                                                                                                                                                                                                                                                                                                                                                                                                              |
| 37. When taking anti-hepatitis B medication, what dietary precautions should I take? | <p>When taking anti-hepatitis B medication, it's important to maintain a healthy diet that supports liver health and overall well-being. Here are some dietary precautions to consider:</p> <ol style="list-style-type: none"> <li>1. <b>Limit Alcohol Consumption</b>: Alcohol can be harmful to the liver, so it's best to avoid or limit alcohol consumption while taking anti-hepatitis B medication.</li> <li>2. <b>Avoid Fatty and Fried Foods</b>: High-fat and fried foods can be harder for the liver to process, so try to limit your intake of these foods. Instead, focus on lean proteins, whole grains, fruits, and vegetables.</li> <li>3. <b>Limit Processed Foods</b>: Processed foods can be high in unhealthy fats, sugars, and additives, which can strain the liver. Opt for whole, unprocessed foods whenever possible.</li> <li>4. <b>Stay Hydrated</b>: Drink plenty of water throughout the day to support liver function and overall health.</li> <li>5. <b>Limit Sodium Intake</b>: Excess sodium can lead to fluid retention and may worsen liver health in some cases. Aim to reduce your sodium intake by avoiding high-sodium processed foods and adding less salt to your meals.</li> <li>6. <b>Moderate Protein Intake</b>: While protein is important for overall health, excessive protein intake can be taxing on the liver. Stick to moderate amounts of lean protein sources such as poultry, fish, beans, and legumes.</li> <li>7. <b>Eat Plenty of Fruits and Vegetables</b>: Fruits and vegetables are rich in antioxidants, vitamins, and minerals that</li> </ol> |

|                                                                                                        |                                                                                                                                                                                                                                                                                                                                                                                                                                                                                                                                                                                                                                                                                                                                                                                                                                                                                                                                                                                                                                                                                                                                                 |
|--------------------------------------------------------------------------------------------------------|-------------------------------------------------------------------------------------------------------------------------------------------------------------------------------------------------------------------------------------------------------------------------------------------------------------------------------------------------------------------------------------------------------------------------------------------------------------------------------------------------------------------------------------------------------------------------------------------------------------------------------------------------------------------------------------------------------------------------------------------------------------------------------------------------------------------------------------------------------------------------------------------------------------------------------------------------------------------------------------------------------------------------------------------------------------------------------------------------------------------------------------------------|
|                                                                                                        | <p>support liver health and overall immunity. Aim to include a variety of colorful fruits and vegetables in your diet.</p> <p>8. <b>**Consider Supplements**</b>: Some supplements, such as milk thistle and turmeric, may have hepatoprotective properties and could support liver health. However, it's essential to talk to your healthcare provider before taking any supplements, as they may interact with your medication.</p> <p>9. <b>**Monitor Your Weight**</b>: Maintaining a healthy weight is important for liver health. If you're overweight or obese, losing weight through a combination of diet and exercise can help improve liver function.</p> <p>10. <b>**Follow Your Healthcare Provider's Recommendations**</b>: Lastly, always follow your healthcare provider's recommendations regarding diet and medication. They can provide personalized advice based on your specific health needs and medication regimen.</p> <p>Overall, focus on eating a balanced diet rich in whole foods, staying hydrated, and avoiding alcohol and unhealthy fats to support liver health while taking anti-hepatitis B medication.</p> |
| 38. I have just been diagnosed with hepatitis B; under what circumstances should I consider treatment? | <p>If you've been diagnosed with hepatitis B, there are several factors to consider when deciding whether to start treatment. Here are some circumstances in which treatment may be considered:</p> <p>1. <b>**Liver Damage**</b>: If your liver function tests show significant liver damage, such as elevated liver enzymes or signs of liver inflammation or scarring (fibrosis or cirrhosis), treatment may be recommended to slow or stop further damage.</p> <p>2. <b>**High Viral Load**</b>: A high level of hepatitis B virus (HBV) in your blood, indicated by a high viral load, may suggest a need for treatment to reduce the risk of complications and transmission to others.</p> <p>3. <b>**Family Planning**</b>: If you're considering pregnancy or are pregnant, treatment may be recommended to reduce the risk of passing the virus to your baby.</p>                                                                                                                                                                                                                                                                      |

|                                                                                                                                           |                                                                                                                                                                                                                                                                                                                                                                                                                                                                                                                                                                                                                                                                                                                                                                                                                                                                                                                                                                                                                                                                                                                                                                                                                           |
|-------------------------------------------------------------------------------------------------------------------------------------------|---------------------------------------------------------------------------------------------------------------------------------------------------------------------------------------------------------------------------------------------------------------------------------------------------------------------------------------------------------------------------------------------------------------------------------------------------------------------------------------------------------------------------------------------------------------------------------------------------------------------------------------------------------------------------------------------------------------------------------------------------------------------------------------------------------------------------------------------------------------------------------------------------------------------------------------------------------------------------------------------------------------------------------------------------------------------------------------------------------------------------------------------------------------------------------------------------------------------------|
|                                                                                                                                           | <p>4. <b>**Presence of Other Conditions**</b>: If you have other liver diseases such as hepatitis C or HIV, or if you have a weakened immune system due to conditions like cancer or immunosuppressive therapy, treatment may be considered to prevent complications.</p> <p>5. <b>**Age and Overall Health**</b>: Your age and overall health play a role in treatment decisions. Younger individuals with hepatitis B may be more likely to be recommended for treatment to prevent long-term complications.</p> <p>6. <b>**Risk of Hepatitis B-related Complications**</b>: Treatment may be recommended if you're at increased risk of hepatitis B-related complications, such as liver cancer or liver failure.</p> <p>7. <b>**Personal Preference**</b>: Some individuals may choose treatment even if they don't meet the usual criteria, especially if they're concerned about the long-term effects of hepatitis B or if they want to reduce the risk of transmitting the virus to others.</p> <p>It's important to discuss these factors with your healthcare provider, who can evaluate your individual situation and help you make an informed decision about whether to start treatment for hepatitis B.</p> |
| 39. I am a patient with chronic hepatitis B undergoing initial treatment; how often should I have check-ups during the treatment process? | <p>For a patient with chronic hepatitis B undergoing initial treatment, the frequency of check-ups can vary based on several factors, including the specific treatment regimen, the severity of your condition, and your overall health status. Typically, your healthcare provider will schedule regular check-ups to monitor your progress and adjust your treatment plan as needed.</p> <p>In general, during the initial phase of treatment, check-ups may be more frequent, often occurring every few weeks to assess your response to the medication and monitor any potential side effects. As your condition stabilizes and your treatment progresses, the frequency of check-ups may decrease, typically to once every few months or as determined by your healthcare provider.</p>                                                                                                                                                                                                                                                                                                                                                                                                                              |

|                                                                                                                                            |                                                                                                                                                                                                                                                                                                                                                                                                                                                                                                                                                                                                                                                                                                                                                                                                                                                                                                                                                                                                                                                                                                                                                                                                                                                                                                                                                                                                                                                                                                                                                                                                                   |
|--------------------------------------------------------------------------------------------------------------------------------------------|-------------------------------------------------------------------------------------------------------------------------------------------------------------------------------------------------------------------------------------------------------------------------------------------------------------------------------------------------------------------------------------------------------------------------------------------------------------------------------------------------------------------------------------------------------------------------------------------------------------------------------------------------------------------------------------------------------------------------------------------------------------------------------------------------------------------------------------------------------------------------------------------------------------------------------------------------------------------------------------------------------------------------------------------------------------------------------------------------------------------------------------------------------------------------------------------------------------------------------------------------------------------------------------------------------------------------------------------------------------------------------------------------------------------------------------------------------------------------------------------------------------------------------------------------------------------------------------------------------------------|
|                                                                                                                                            | <p>It's important to attend all scheduled check-ups and follow your healthcare provider's recommendations closely to ensure the effectiveness of your treatment and to address any issues that may arise promptly. Additionally, if you experience any new symptoms or concerns between check-ups, don't hesitate to contact your healthcare provider for guidance.</p>                                                                                                                                                                                                                                                                                                                                                                                                                                                                                                                                                                                                                                                                                                                                                                                                                                                                                                                                                                                                                                                                                                                                                                                                                                           |
| <p>40. I have chronic hepatitis B and am currently pregnant; what should I be aware of? How can I prevent transmission to the newborn?</p> | <p>Managing chronic hepatitis B during pregnancy requires careful monitoring and planning to ensure the health of both you and your baby. Here's what you should be aware of and steps you can take to prevent transmission to your newborn:</p> <ol style="list-style-type: none"> <li>1. <b>Regular Monitoring:</b> It's essential to continue regular check-ups with your healthcare provider throughout your pregnancy. They will monitor your liver function and viral load to ensure your hepatitis B is well-managed.</li> <li>2. <b>Consult with a Specialist:</b> Seek care from a healthcare provider who specializes in managing hepatitis B during pregnancy. They can provide personalized guidance based on your specific situation.</li> <li>3. <b>Medication Management:</b> Some medications used to manage hepatitis B may not be safe during pregnancy. Your healthcare provider will assess your current medication regimen and make any necessary adjustments to ensure both your health and the health of your baby.</li> <li>4. <b>Mode of Delivery:</b> The mode of delivery can affect the risk of transmission to your baby. In most cases, a vaginal delivery is safe. However, if your viral load is high, your healthcare provider may recommend a cesarean section to reduce the risk of transmission.</li> <li>5. <b>Hepatitis B Immunoglobulin (HBIG) and Vaccination:</b> Shortly after birth, your baby will receive hepatitis B immunoglobulin (HBIG) and the first dose of the hepatitis B vaccine. This helps protect them from acquiring the infection from you.</li> </ol> |

|                                                   |                                                                                                                                                                                                                                                                                                                                                                                                                                                                                                                                                                                                                                                                                                                                                                                                                                                                                                                                                                                                                                                                                                                                                                                                                                                                                                                                                                                    |
|---------------------------------------------------|------------------------------------------------------------------------------------------------------------------------------------------------------------------------------------------------------------------------------------------------------------------------------------------------------------------------------------------------------------------------------------------------------------------------------------------------------------------------------------------------------------------------------------------------------------------------------------------------------------------------------------------------------------------------------------------------------------------------------------------------------------------------------------------------------------------------------------------------------------------------------------------------------------------------------------------------------------------------------------------------------------------------------------------------------------------------------------------------------------------------------------------------------------------------------------------------------------------------------------------------------------------------------------------------------------------------------------------------------------------------------------|
|                                                   | <p>6. <b>**Vaccination Schedule:**</b> Follow the recommended vaccination schedule for your baby, which typically includes additional doses of the hepatitis B vaccine at specific intervals.</p> <p>7. <b>**Breastfeeding:**</b> If your baby receives HBIG and the hepatitis B vaccine shortly after birth, breastfeeding is generally considered safe. However, if your nipples are cracked or bleeding, it's essential to temporarily avoid breastfeeding to reduce the risk of transmission through breast milk.</p> <p>8. <b>**Testing for Your Baby:**</b> Your baby will undergo testing for hepatitis B surface antigen (HBsAg) and hepatitis B antibodies at specific intervals to monitor for infection. If they test positive for HBsAg, they will require further evaluation and possibly treatment.</p> <p>9. <b>**Preventive Measures:**</b> Encourage family members to get vaccinated against hepatitis B if they haven't already done so. Practicing good hygiene, such as not sharing personal items like razors or toothbrushes, can also help prevent transmission within the household.</p> <p>It's crucial to work closely with your healthcare provider throughout your pregnancy to ensure the best possible outcome for both you and your baby. They can provide personalized guidance and support based on your individual needs and circumstances.</p> |
| 41. I have hepatitis C; how should it be treated? | <p>Treatment for hepatitis C has evolved significantly in recent years, offering more effective options with fewer side effects. The primary goal of treatment is to eliminate the virus from your body and prevent liver damage, cirrhosis, and other complications. Here are some common approaches to treating hepatitis C:</p> <p>1. <b>**Antiviral Medications:**</b> Direct-acting antiviral (DAA) medications are the primary treatment for hepatitis C. These drugs target the virus itself and inhibit its replication. DAAs have high cure rates and are usually taken orally once daily for a specified duration, typically ranging from 8 to 12 weeks depending on the specific medication and the genotype of</p>                                                                                                                                                                                                                                                                                                                                                                                                                                                                                                                                                                                                                                                     |

|                                                               |                                                                                                                                                                                                                                                                                                                                                                                                                                                                                                                                                                                                                                                                                                                                                                                                                                                                                                                                                                                                                                                                                                                                                                                                                                                                                                                                                                                                                                                                                                                                                                                                                    |
|---------------------------------------------------------------|--------------------------------------------------------------------------------------------------------------------------------------------------------------------------------------------------------------------------------------------------------------------------------------------------------------------------------------------------------------------------------------------------------------------------------------------------------------------------------------------------------------------------------------------------------------------------------------------------------------------------------------------------------------------------------------------------------------------------------------------------------------------------------------------------------------------------------------------------------------------------------------------------------------------------------------------------------------------------------------------------------------------------------------------------------------------------------------------------------------------------------------------------------------------------------------------------------------------------------------------------------------------------------------------------------------------------------------------------------------------------------------------------------------------------------------------------------------------------------------------------------------------------------------------------------------------------------------------------------------------|
|                                                               | <p>the virus.</p> <p>2. <b>**Combination Therapy:**</b> In some cases, DAAs are used in combination with other medications, such as ribavirin or interferon, to enhance treatment effectiveness, especially in individuals with certain genotypes or advanced liver disease.</p> <p>3. <b>**Regular Monitoring:**</b> Throughout your treatment, your healthcare provider will monitor your progress through blood tests to assess the level of the virus in your blood (viral load) and check liver function. This helps ensure that the treatment is working effectively and allows for adjustments if needed.</p> <p>4. <b>**Liver Health Management:**</b> Alongside antiviral therapy, it's essential to take steps to maintain overall liver health. This includes avoiding alcohol consumption, eating a healthy diet, getting regular exercise, and avoiding potentially hepatotoxic medications or substances.</p> <p>5. <b>**Follow-Up Care:**</b> After completing treatment, you'll continue to have regular follow-up appointments to monitor for any signs of relapse and to assess your liver health long-term. It's crucial to attend these appointments and follow your healthcare provider's recommendations for ongoing care.</p> <p>It's essential to consult with a healthcare professional experienced in treating hepatitis C to determine the most appropriate treatment plan for your specific situation. Treatment decisions may depend on factors such as the genotype of the virus, the extent of liver damage, any coexisting medical conditions, and previous treatment history.</p> |
| 42. What are the common medications for treating hepatitis C? | <p>The treatment landscape for hepatitis C has seen significant advancements over the years, particularly with the introduction of direct-acting antiviral (DAA) medications. These medications have revolutionized the management of hepatitis C, offering higher cure rates and shorter treatment durations compared to older regimens.</p> <p>Some common medications used to treat hepatitis C include:</p>                                                                                                                                                                                                                                                                                                                                                                                                                                                                                                                                                                                                                                                                                                                                                                                                                                                                                                                                                                                                                                                                                                                                                                                                    |

|                                                                            |                                                                                                                                                                                                                                                                                                                                                                                                                                                                                                                                                                                                                                                                                                                                                                                                                                                                                                                                                                                                                                                                                                                                                                                      |
|----------------------------------------------------------------------------|--------------------------------------------------------------------------------------------------------------------------------------------------------------------------------------------------------------------------------------------------------------------------------------------------------------------------------------------------------------------------------------------------------------------------------------------------------------------------------------------------------------------------------------------------------------------------------------------------------------------------------------------------------------------------------------------------------------------------------------------------------------------------------------------------------------------------------------------------------------------------------------------------------------------------------------------------------------------------------------------------------------------------------------------------------------------------------------------------------------------------------------------------------------------------------------|
|                                                                            | <ol style="list-style-type: none"> <li>1. Sofosbuvir (Sovaldi)</li> <li>2. Ledipasvir-sofosbuvir (Harvoni)</li> <li>3. Glecaprevir-pibrentasvir (Mavyret)</li> <li>4. Elbasvir-grazoprevir (Zepatier)</li> <li>5. Sofosbuvir-velpatasvir (Epclusa)</li> <li>6. Daclatasvir (Daklinza)</li> <li>7. Ombitasvir-paritaprevir-ritonavir (Technivie)</li> <li>8. Grazoprevir-elbasvir (Zepatier)</li> </ol> <p>These medications are often used in combination with one another, depending on the specific genotype of the hepatitis C virus (HCV) and the patient's individual characteristics. Treatment regimens typically involve taking these medications orally for a specified duration, usually ranging from 8 to 12 weeks.</p> <p>It's important to note that the choice of medication and duration of treatment will be determined by various factors, including the genotype of the virus, the presence of liver damage, prior treatment history, and any concurrent medical conditions. Additionally, close monitoring by a healthcare provider is essential throughout the treatment process to assess the response to medication and manage any potential side effects.</p> |
| 43. What tests should I undergo before starting treatment for hepatitis C? | <p>Before starting treatment for hepatitis C, it's important to undergo several tests to assess the extent of the infection, determine the genotype of the virus, evaluate the health of your liver, and check for any potential complications. Here are the essential tests you should undergo:</p> <ol style="list-style-type: none"> <li>1. <b>Hepatitis C Antibody Test</b>: This blood test detects antibodies produced by your immune system in response to the hepatitis C virus (HCV). A positive result indicates exposure to the virus, but it doesn't necessarily mean you have a current infection.</li> </ol>                                                                                                                                                                                                                                                                                                                                                                                                                                                                                                                                                           |

2. **\*\*HCV RNA Test (Quantitative PCR)\*\*:** This test measures the amount of hepatitis C virus RNA in your blood. It confirms whether you have an active hepatitis C infection.
3. **\*\*Liver Function Tests (LFTs)\*\*:** These blood tests measure the levels of various enzymes and proteins in your blood that indicate how well your liver is functioning. Elevated levels may suggest liver damage caused by hepatitis C.
4. **\*\*Liver Biopsy or Elastography\*\*:** Depending on your condition, your doctor may recommend a liver biopsy or a non-invasive alternative like elastography to assess the degree of liver fibrosis or cirrhosis.
5. **\*\*Genotype Testing\*\*:** Hepatitis C viruses are classified into different genotypes and subtypes. Knowing your genotype helps determine the most effective treatment regimen and duration.
6. **\*\*Viral Load Monitoring\*\*:** Throughout your treatment, your doctor will periodically monitor your viral load to assess how well the treatment is working.
7. **\*\*HIV and Hepatitis B Testing\*\*:** It's common for people with hepatitis C to also have HIV or hepatitis B. Testing for these infections is important for determining the most appropriate treatment approach.
8. **\*\*Liver Imaging Studies\*\*:** Your doctor may order imaging tests such as ultrasound, CT scan, or MRI to evaluate the condition of your liver and check for any signs of liver damage or complications.
9. **\*\*Complete Blood Count (CBC)\*\*:** This test evaluates the number and types of blood cells in your body, which can be affected by hepatitis C or its treatment.
10. **\*\*Kidney Function Tests\*\*:** Some hepatitis C medications can affect kidney function, so it's important to assess your kidney health before starting treatment.



|                                                                                                                                           |                                                                                                                                                                                                                                                                                                                                                                                                                                                                                                                                                                                                                                                                                                                                                                                                                                                                                                                                                                                                                                                                                                                                                                                                                                                                                                                                                                                                                                                                                                                                                                                                  |
|-------------------------------------------------------------------------------------------------------------------------------------------|--------------------------------------------------------------------------------------------------------------------------------------------------------------------------------------------------------------------------------------------------------------------------------------------------------------------------------------------------------------------------------------------------------------------------------------------------------------------------------------------------------------------------------------------------------------------------------------------------------------------------------------------------------------------------------------------------------------------------------------------------------------------------------------------------------------------------------------------------------------------------------------------------------------------------------------------------------------------------------------------------------------------------------------------------------------------------------------------------------------------------------------------------------------------------------------------------------------------------------------------------------------------------------------------------------------------------------------------------------------------------------------------------------------------------------------------------------------------------------------------------------------------------------------------------------------------------------------------------|
|                                                                                                                                           | <p>11. <b>**Screening for Other Liver Conditions**</b>: Your doctor may recommend additional tests to screen for other liver conditions such as fatty liver disease or autoimmune hepatitis.</p> <p>These tests provide valuable information that helps your healthcare provider tailor a treatment plan specifically for you, maximizing the chances of successful treatment outcomes while minimizing potential side effects. Always discuss any concerns or questions you have with your healthcare provider.</p>                                                                                                                                                                                                                                                                                                                                                                                                                                                                                                                                                                                                                                                                                                                                                                                                                                                                                                                                                                                                                                                                             |
| <p>44. I have hepatitis C and high blood pressure; which blood pressure medications should not be taken with hepatitis C medications?</p> | <p>When managing high blood pressure in someone with hepatitis C, it's crucial to consider potential interactions between blood pressure medications and those used to treat hepatitis C. Some blood pressure medications may interact with hepatitis C medications, leading to adverse effects or reduced effectiveness of either medication.</p> <p>Angiotensin-converting enzyme (ACE) inhibitors and angiotensin II receptor blockers (ARBs) are commonly prescribed for high blood pressure. These medications include drugs like lisinopril, enalapril, ramipril (ACE inhibitors), and losartan, valsartan, irbesartan (ARBs).</p> <p>Interactions between ACE inhibitors/ARBs and hepatitis C medications are generally not significant. However, some hepatitis C medications, particularly those involving the liver enzyme cytochrome P450 (CYP450) system, may affect the metabolism of certain blood pressure medications.</p> <p>For instance, hepatitis C protease inhibitors like telaprevir or boceprevir can increase blood levels of some calcium channel blockers, such as amlodipine or diltiazem, which may lead to a higher risk of side effects like low blood pressure or swelling. Therefore, caution is advised when combining these medications, and close monitoring by your healthcare provider is essential.</p> <p>Before starting any new medication or making changes to your current regimen, always consult with your healthcare provider. They can review your medical history, current medications, and any potential interactions to ensure the safest</p> |

|                                                                                                                          |                                                                                                                                                                                                                                                                                                                                                                                                                                                                                                                                                                                                                                                                                                                                                                                                                                                                                                                                                                                                                                                                                                                                                                                                                                                                                                                                                                                                                                                                                                                                                                                                                                                                                                                                                                                                                                                                                                                                                                                                                                                                                                                           |
|--------------------------------------------------------------------------------------------------------------------------|---------------------------------------------------------------------------------------------------------------------------------------------------------------------------------------------------------------------------------------------------------------------------------------------------------------------------------------------------------------------------------------------------------------------------------------------------------------------------------------------------------------------------------------------------------------------------------------------------------------------------------------------------------------------------------------------------------------------------------------------------------------------------------------------------------------------------------------------------------------------------------------------------------------------------------------------------------------------------------------------------------------------------------------------------------------------------------------------------------------------------------------------------------------------------------------------------------------------------------------------------------------------------------------------------------------------------------------------------------------------------------------------------------------------------------------------------------------------------------------------------------------------------------------------------------------------------------------------------------------------------------------------------------------------------------------------------------------------------------------------------------------------------------------------------------------------------------------------------------------------------------------------------------------------------------------------------------------------------------------------------------------------------------------------------------------------------------------------------------------------------|
|                                                                                                                          | <p>and most effective treatment plan for you. Additionally, regular monitoring of liver function and blood pressure is important for managing both conditions effectively.</p>                                                                                                                                                                                                                                                                                                                                                                                                                                                                                                                                                                                                                                                                                                                                                                                                                                                                                                                                                                                                                                                                                                                                                                                                                                                                                                                                                                                                                                                                                                                                                                                                                                                                                                                                                                                                                                                                                                                                            |
| <p>45. I have hepatitis C and diabetes; which diabetic medications should not be taken with hepatitis C medications?</p> | <p>When managing diabetes in the presence of hepatitis C, it's crucial to consider potential drug interactions between diabetic medications and those used to treat hepatitis C. Interactions can occur due to the way medications are metabolized in the liver, which is particularly important as both conditions can impact liver function.</p> <p>Certain antidiabetic medications may interact with hepatitis C medications, particularly those that are metabolized by the liver or affect liver function. Some diabetic medications to be cautious with include:</p> <ol style="list-style-type: none"> <li>1. <b>**Metformin**</b>: This medication is commonly used to treat type 2 diabetes. While it is generally considered safe, it can cause a rare but serious side effect called lactic acidosis, especially in individuals with liver impairment. Therefore, its use should be closely monitored in patients with hepatitis C.</li> <li>2. <b>**Sulfonylureas**</b>: Medications like glyburide, glipizide, and gliclazide stimulate insulin secretion from the pancreas. They are primarily metabolized by the liver, so their doses may need adjustment in individuals with hepatic impairment.</li> <li>3. <b>**Thiazolidinediones (TZDs)**</b>: Drugs like pioglitazone and rosiglitazone improve insulin sensitivity. They are also metabolized in the liver and may require dosage adjustments in patients with liver dysfunction.</li> <li>4. <b>**Alpha-glucosidase inhibitors**</b>: Acarbose and miglitol are medications that slow down the absorption of carbohydrates from the digestive tract. While they are not extensively metabolized in the liver, caution may still be warranted in patients with liver impairment.</li> <li>5. <b>**Dipeptidyl peptidase-4 (DPP-4) inhibitors**</b>: Sitagliptin, saxagliptin, linagliptin, and alogliptin are medications that increase insulin secretion and decrease glucagon secretion. They are generally considered safe in patients with hepatic impairment but may require dose adjustments based on individual patient factors.</li> </ol> |

|                                                                                                                                                    |                                                                                                                                                                                                                                                                                                                                                                                                                                                                                                                                                                                                                                                                                                                                                                                                                                                                                                                                                                                                                                                                                                                                                                                                                                                                                                                                         |
|----------------------------------------------------------------------------------------------------------------------------------------------------|-----------------------------------------------------------------------------------------------------------------------------------------------------------------------------------------------------------------------------------------------------------------------------------------------------------------------------------------------------------------------------------------------------------------------------------------------------------------------------------------------------------------------------------------------------------------------------------------------------------------------------------------------------------------------------------------------------------------------------------------------------------------------------------------------------------------------------------------------------------------------------------------------------------------------------------------------------------------------------------------------------------------------------------------------------------------------------------------------------------------------------------------------------------------------------------------------------------------------------------------------------------------------------------------------------------------------------------------|
|                                                                                                                                                    | <p>6. <b>**GLP-1 receptor agonists**</b>: Drugs like exenatide, liraglutide, dulaglutide, and semaglutide enhance insulin secretion and decrease glucagon secretion. They are not primarily metabolized by the liver and are considered safe to use in patients with hepatitis C.</p> <p>It's essential to consult with your healthcare provider, preferably a hepatologist or endocrinologist, who can carefully evaluate your specific situation and recommend the most appropriate treatment regimen. They can adjust doses or choose alternative medications to minimize the risk of drug interactions and optimize the management of both conditions. Additionally, regular monitoring of liver function tests and blood glucose levels is crucial for effective management.</p>                                                                                                                                                                                                                                                                                                                                                                                                                                                                                                                                                   |
| <p>46. I have hepatitis C and coronary heart disease; which cholesterol-lowering medications should not be taken with hepatitis C medications?</p> | <p>When managing hepatitis C and coronary heart disease concurrently, it's essential to be cautious about potential drug interactions, particularly between cholesterol-lowering medications and those used to treat hepatitis C. Some cholesterol-lowering medications, specifically statins, can interact with certain hepatitis C medications, particularly those in the class of direct-acting antivirals (DAAs).</p> <p>The primary concern is with DAAs that are metabolized by the liver enzyme CYP3A4, as statins are also metabolized by this enzyme. Combining certain statins with CYP3A4-metabolized DAAs can increase the risk of statin-related side effects, such as muscle toxicity, due to elevated statin levels in the blood.</p> <p>Here are some general guidelines to consider:</p> <ol style="list-style-type: none"> <li>1. <b>**Atorvastatin and Simvastatin**</b>: These statins are metabolized by CYP3A4. They should be used cautiously with DAAs, particularly those that also rely on CYP3A4 metabolism. Depending on the specific DAA being used, the dose of atorvastatin or simvastatin may need to be adjusted or alternative statins may be considered.</li> <li>2. <b>**Rosuvastatin and Pravastatin**</b>: These statins are not metabolized by CYP3A4 to a significant extent and are</li> </ol> |

|                                                                                                                                                              |                                                                                                                                                                                                                                                                                                                                                                                                                                                                                                                                                                                                                                                                                                                                                                                                                                                                                                                                                                                                                                                                                                                                                                                                                                                                                                       |
|--------------------------------------------------------------------------------------------------------------------------------------------------------------|-------------------------------------------------------------------------------------------------------------------------------------------------------------------------------------------------------------------------------------------------------------------------------------------------------------------------------------------------------------------------------------------------------------------------------------------------------------------------------------------------------------------------------------------------------------------------------------------------------------------------------------------------------------------------------------------------------------------------------------------------------------------------------------------------------------------------------------------------------------------------------------------------------------------------------------------------------------------------------------------------------------------------------------------------------------------------------------------------------------------------------------------------------------------------------------------------------------------------------------------------------------------------------------------------------|
|                                                                                                                                                              | <p>generally considered safer options when used concurrently with DAAs. However, close monitoring for potential side effects is still advisable.</p> <p>3. <b>Ezetimibe</b>: This medication works by a different mechanism than statins and is not metabolized by CYP3A4. It can be considered as an alternative or adjunctive therapy for lowering cholesterol levels in individuals with hepatitis C and coronary heart disease.</p> <p>Always consult with your healthcare provider before starting or stopping any medications, as they can provide personalized recommendations based on your specific medical history, the specific hepatitis C treatment regimen being used, and other factors such as kidney function and concomitant medications. They can help ensure that your treatment plan is both effective and safe for your individual circumstances.</p>                                                                                                                                                                                                                                                                                                                                                                                                                           |
| 47. After standardized treatment for hepatitis C, if the hepatitis C RNA test is negative but hepatitis C antibodies are still positive, is there a problem? | <p>After completing standardized treatment for hepatitis C, it's common for the hepatitis C RNA test to become negative, indicating that the virus is no longer detectable in the blood. However, it's possible for hepatitis C antibodies to remain positive even after successful treatment. This is because hepatitis C antibodies indicate a past infection, and they may persist in the bloodstream even after the virus has been cleared.</p> <p>In most cases, the persistence of hepatitis C antibodies after successful treatment is not a cause for concern. It simply means that the immune system has developed antibodies in response to the previous infection, and these antibodies can persist for many years.</p> <p>However, in some cases, the persistence of hepatitis C antibodies may be indicative of ongoing liver inflammation or another underlying liver condition. If the patient is experiencing symptoms such as fatigue, jaundice, or abdominal pain, further evaluation may be necessary to determine the cause.</p> <p>In summary, while it's normal for hepatitis C antibodies to remain positive after successful treatment, it's important to monitor the patient's liver health and address any concerning symptoms that may arise. If you have any specific</p> |

|                                                                                                                                                                                                 |                                                                                                                                                                                                                                                                                                                                                                                                                                                                                                                                                                                                                                                                                                                                                                                                                                                                                                                                                                                                                                                                                                                                                                                                                                                                                                                             |
|-------------------------------------------------------------------------------------------------------------------------------------------------------------------------------------------------|-----------------------------------------------------------------------------------------------------------------------------------------------------------------------------------------------------------------------------------------------------------------------------------------------------------------------------------------------------------------------------------------------------------------------------------------------------------------------------------------------------------------------------------------------------------------------------------------------------------------------------------------------------------------------------------------------------------------------------------------------------------------------------------------------------------------------------------------------------------------------------------------------------------------------------------------------------------------------------------------------------------------------------------------------------------------------------------------------------------------------------------------------------------------------------------------------------------------------------------------------------------------------------------------------------------------------------|
|                                                                                                                                                                                                 | <p>concerns about a patient's test results, I recommend discussing them with a healthcare provider for further evaluation and guidance.</p>                                                                                                                                                                                                                                                                                                                                                                                                                                                                                                                                                                                                                                                                                                                                                                                                                                                                                                                                                                                                                                                                                                                                                                                 |
| <p>48. I have hepatitis C; after one month of antiviral treatment, the hepatitis C RNA test is negative; do I need to continue treatment for 3 to 6 months according to the treatment plan?</p> | <p>It's great news that your hepatitis C RNA test is negative after just one month of antiviral treatment! This indicates that the treatment is effectively reducing the viral load in your body. However, it's important to follow the treatment plan recommended by your healthcare provider.</p> <p>Typically, the duration of treatment for hepatitis C can vary depending on several factors including the genotype of the virus, the extent of liver damage, and individual response to treatment. In many cases, treatment is continued for a total of 3 to 6 months even after achieving a negative RNA test result to ensure complete eradication of the virus and to prevent the possibility of viral rebound.</p> <p>Continuing treatment as prescribed by your healthcare provider is important to maximize the chances of achieving a sustained virologic response, which means that the virus remains undetectable even after stopping treatment. This can help reduce the risk of liver damage and other complications associated with chronic hepatitis C infection.</p> <p>I would recommend discussing your specific treatment plan and any concerns you may have with your healthcare provider. They can provide you with personalized guidance based on your medical history and current condition.</p> |
| <p>49. If I have been treated for hepatitis C according to the treatment plan and recovered, can I get hepatitis C again?</p>                                                                   | <p>Once you've been successfully treated for hepatitis C according to the recommended treatment plan and have achieved sustained virologic response (SVR), meaning that the virus is undetectable in your bloodstream for a period of time after treatment, the likelihood of getting hepatitis C again is extremely low. SVR indicates that the treatment has effectively cleared the virus from your body, reducing the risk of recurrence significantly.</p> <p>However, it's essential to maintain precautions to prevent reinfection. This includes avoiding behaviors that can expose you to the virus, such as sharing needles or engaging in unprotected sex with partners who have hepatitis C. Additionally, practicing good hygiene, such as not sharing personal items like razors or toothbrushes that may have blood on them, can help reduce the risk of reinfection.</p>                                                                                                                                                                                                                                                                                                                                                                                                                                    |

|                                                                                                                                                                   |                                                                                                                                                                                                                                                                                                                                                                                                                                                                                                                                                                                                                                                                                                                                                                                                                                                                                                                                                                                                                                                                                                                                                                                                                                                                                                                     |
|-------------------------------------------------------------------------------------------------------------------------------------------------------------------|---------------------------------------------------------------------------------------------------------------------------------------------------------------------------------------------------------------------------------------------------------------------------------------------------------------------------------------------------------------------------------------------------------------------------------------------------------------------------------------------------------------------------------------------------------------------------------------------------------------------------------------------------------------------------------------------------------------------------------------------------------------------------------------------------------------------------------------------------------------------------------------------------------------------------------------------------------------------------------------------------------------------------------------------------------------------------------------------------------------------------------------------------------------------------------------------------------------------------------------------------------------------------------------------------------------------|
|                                                                                                                                                                   | <p>Regular follow-up appointments with your healthcare provider are crucial to monitor your liver health and ensure that the virus has not returned. While the risk of recurrence is low after successful treatment, it's still important to stay vigilant and take necessary precautions to protect your health. If you have any concerns or notice symptoms suggestive of hepatitis C recurrence, don't hesitate to reach out to your healthcare provider for further evaluation and guidance.</p>                                                                                                                                                                                                                                                                                                                                                                                                                                                                                                                                                                                                                                                                                                                                                                                                                |
| <p>50. If I have been treated for hepatitis C according to the treatment plan and recovered, do I need further check-ups? How often should check-ups be done?</p> | <p>Yes, even after successful treatment and recovery from hepatitis C, it's important to continue with regular check-ups to monitor your health. While the virus may be cleared from your system, there can still be potential long-term effects or complications that need to be monitored.</p> <p>The frequency of these check-ups can vary depending on your individual health status, any lingering liver damage, and other risk factors such as co-existing medical conditions. Typically, check-ups are recommended every six to 12 months initially, and then less frequently as deemed appropriate by your healthcare provider.</p> <p>During these check-ups, your doctor will likely perform blood tests to assess liver function, check for any signs of liver damage or inflammation, and monitor for any potential recurrence of the hepatitis C virus. They may also discuss lifestyle factors that can support your liver health, such as maintaining a healthy diet, avoiding alcohol and certain medications that can stress the liver, and getting regular exercise.</p> <p>Remember, staying proactive with your healthcare and attending regular check-ups can help ensure that any potential issues are identified and addressed promptly, promoting your long-term health and well-being.</p> |
| <p>51. If diagnosed with chronic hepatitis E, how should it be treated?</p>                                                                                       | <p>Chronic hepatitis E is a relatively rare condition, but its treatment typically involves managing symptoms and providing supportive care rather than using specific antiviral medications. Here's how it's typically approached:</p> <ol style="list-style-type: none"> <li>1. <b>**Monitoring Liver Function**</b>: Regular monitoring of liver function tests is crucial to assess the progression of the disease and determine the need for any interventions.</li> </ol>                                                                                                                                                                                                                                                                                                                                                                                                                                                                                                                                                                                                                                                                                                                                                                                                                                     |

|                                                                       |                                                                                                                                                                                                                                                                                                                                                                                                                                                                                                                                                                                                                                                                                                                                                                                                                                                                                                                                                                                                                                                                                                                                                                                                                                                                                                                                                                                                                                                                              |
|-----------------------------------------------------------------------|------------------------------------------------------------------------------------------------------------------------------------------------------------------------------------------------------------------------------------------------------------------------------------------------------------------------------------------------------------------------------------------------------------------------------------------------------------------------------------------------------------------------------------------------------------------------------------------------------------------------------------------------------------------------------------------------------------------------------------------------------------------------------------------------------------------------------------------------------------------------------------------------------------------------------------------------------------------------------------------------------------------------------------------------------------------------------------------------------------------------------------------------------------------------------------------------------------------------------------------------------------------------------------------------------------------------------------------------------------------------------------------------------------------------------------------------------------------------------|
|                                                                       | <p>2. <b>Avoidance of Alcohol</b>: Patients diagnosed with chronic hepatitis E should abstain from alcohol consumption, as it can exacerbate liver damage.</p> <p>3. <b>Maintaining a Healthy Lifestyle</b>: Encouraging patients to adopt a healthy lifestyle, including a balanced diet, regular exercise, and adequate rest, can help support liver function and overall well-being.</p> <p>4. <b>Symptomatic Treatment</b>: If patients experience symptoms such as fatigue, nausea, or abdominal discomfort, symptomatic treatment may be prescribed to alleviate these symptoms. This could include medications to relieve nausea or pain.</p> <p>5. <b>Consultation with a Specialist</b>: Referral to a hepatologist or gastroenterologist may be necessary for further evaluation and management, especially in cases where liver function deteriorates or complications develop.</p> <p>In some cases, particularly in individuals with weakened immune systems or severe liver disease, antiviral therapy may be considered. However, the evidence supporting the use of specific antiviral medications for chronic hepatitis E is limited, and the decision to initiate such treatment should be made on a case-by-case basis in consultation with a specialist.</p> <p>Overall, the management of chronic hepatitis E revolves around supportive care, lifestyle modifications, and close monitoring to ensure optimal liver health and overall well-being.</p> |
| 52. If a family member has hepatitis E, how should others prevent it? | <p>Hepatitis E is primarily transmitted through the consumption of contaminated water or food. To prevent the spread of hepatitis E to other family members, it's essential to practice good hygiene and sanitation measures:</p> <p>1. <b>Handwashing</b>: Encourage frequent handwashing with soap and water, especially before handling food, after using the toilet, and after caring for the infected family member.</p>                                                                                                                                                                                                                                                                                                                                                                                                                                                                                                                                                                                                                                                                                                                                                                                                                                                                                                                                                                                                                                                |

|  |                                                                                                                                                                                                                                                                                                                                                                                                                                                                                                                                                                                                                                                                                                                                                                                                                                                                                                                                                                                                                                                                                                                                                                                                                                                                                                                                                                                                                                                                                                                                                           |
|--|-----------------------------------------------------------------------------------------------------------------------------------------------------------------------------------------------------------------------------------------------------------------------------------------------------------------------------------------------------------------------------------------------------------------------------------------------------------------------------------------------------------------------------------------------------------------------------------------------------------------------------------------------------------------------------------------------------------------------------------------------------------------------------------------------------------------------------------------------------------------------------------------------------------------------------------------------------------------------------------------------------------------------------------------------------------------------------------------------------------------------------------------------------------------------------------------------------------------------------------------------------------------------------------------------------------------------------------------------------------------------------------------------------------------------------------------------------------------------------------------------------------------------------------------------------------|
|  | <p>2. <b>**Food Safety:**</b> Ensure that all food is properly cooked and stored. Avoid consuming undercooked or raw shellfish, meat, or other animal products. Wash fruits and vegetables thoroughly before consumption.</p> <p>3. <b>**Water Safety:**</b> Drink only safe, clean water. If there are concerns about the safety of the water supply, consider boiling water before use or using bottled water.</p> <p>4. <b>**Avoid Sharing Personal Items:**</b> Do not share personal items such as razors, toothbrushes, or needles with the infected family member to prevent the transmission of the virus through blood or bodily fluids.</p> <p>5. <b>**Practice Safe Sex:**</b> If applicable, practice safe sex to prevent the transmission of the virus through sexual contact.</p> <p>6. <b>**Vaccination:**</b> In some regions where hepatitis E is prevalent, there may be a vaccine available. If so, family members who are at risk of exposure may consider getting vaccinated.</p> <p>7. <b>**Maintain Clean Environment:**</b> Keep living spaces clean and hygienic, including bathrooms and kitchens. Disinfect surfaces regularly, especially those that come into contact with bodily fluids.</p> <p>By following these preventive measures, the risk of transmission of hepatitis E within the family can be significantly reduced. However, if any family members develop symptoms such as jaundice, fatigue, nausea, or abdominal pain, they should seek medical attention promptly for proper evaluation and management.</p> |
|--|-----------------------------------------------------------------------------------------------------------------------------------------------------------------------------------------------------------------------------------------------------------------------------------------------------------------------------------------------------------------------------------------------------------------------------------------------------------------------------------------------------------------------------------------------------------------------------------------------------------------------------------------------------------------------------------------------------------------------------------------------------------------------------------------------------------------------------------------------------------------------------------------------------------------------------------------------------------------------------------------------------------------------------------------------------------------------------------------------------------------------------------------------------------------------------------------------------------------------------------------------------------------------------------------------------------------------------------------------------------------------------------------------------------------------------------------------------------------------------------------------------------------------------------------------------------|



Supplementary Table 1b: Claude-3.5-sonnet Responses to Questions

| Question                    | Claude-3.5-sonnet Response                                                                                                                                                                                                                                                                                                                                                                                                                                                                                                                                                                                                                                                                                                                                                                                                                                                                                                                                                                                                                                                                                                                                                                                                                                                                                                                                                                                      |
|-----------------------------|-----------------------------------------------------------------------------------------------------------------------------------------------------------------------------------------------------------------------------------------------------------------------------------------------------------------------------------------------------------------------------------------------------------------------------------------------------------------------------------------------------------------------------------------------------------------------------------------------------------------------------------------------------------------------------------------------------------------------------------------------------------------------------------------------------------------------------------------------------------------------------------------------------------------------------------------------------------------------------------------------------------------------------------------------------------------------------------------------------------------------------------------------------------------------------------------------------------------------------------------------------------------------------------------------------------------------------------------------------------------------------------------------------------------|
| Topic: Concept              |                                                                                                                                                                                                                                                                                                                                                                                                                                                                                                                                                                                                                                                                                                                                                                                                                                                                                                                                                                                                                                                                                                                                                                                                                                                                                                                                                                                                                 |
| 1. What is viral hepatitis? | <p>Viral hepatitis refers to inflammation of the liver caused by a viral infection. There are several types of viral hepatitis, including hepatitis A, hepatitis B, hepatitis C, hepatitis D, and hepatitis E. Each type is caused by a different virus, and they vary in terms of transmission routes, severity, and long-term effects on the liver.</p> <p>Hepatitis A and E are typically transmitted through contaminated food or water, while hepatitis B, C, and D are spread through contact with infected blood or bodily fluids, such as through sexual contact, sharing needles, or from mother to child during childbirth.</p> <p>Symptoms of viral hepatitis can range from mild to severe and may include fatigue, jaundice (yellowing of the skin and eyes), abdominal pain, nausea, vomiting, and loss of appetite. In some cases, viral hepatitis can lead to chronic liver disease, liver cirrhosis, or liver cancer.</p> <p>Prevention strategies include vaccination for hepatitis A and B, practicing safe sex, avoiding sharing needles, and practicing good hygiene, such as washing hands thoroughly and avoiding contaminated food and water. Treatment for viral hepatitis depends on the specific type and may include antiviral medications, supportive care, and lifestyle changes. Early detection and management are essential to prevent complications and improve outcomes.</p> |

|                                                          |                                                                                                                                                                                                                                                                                                                                                                                                                                                                                                                                                                                                                                                                                                                                                                                                                                                                                                                                                                                                                                                                                                                                                                                                                                                                                                                                                                                                                                                                                                                                                                                                                                                                                                                                                                                                                                                                                                                                                                                      |
|----------------------------------------------------------|--------------------------------------------------------------------------------------------------------------------------------------------------------------------------------------------------------------------------------------------------------------------------------------------------------------------------------------------------------------------------------------------------------------------------------------------------------------------------------------------------------------------------------------------------------------------------------------------------------------------------------------------------------------------------------------------------------------------------------------------------------------------------------------------------------------------------------------------------------------------------------------------------------------------------------------------------------------------------------------------------------------------------------------------------------------------------------------------------------------------------------------------------------------------------------------------------------------------------------------------------------------------------------------------------------------------------------------------------------------------------------------------------------------------------------------------------------------------------------------------------------------------------------------------------------------------------------------------------------------------------------------------------------------------------------------------------------------------------------------------------------------------------------------------------------------------------------------------------------------------------------------------------------------------------------------------------------------------------------------|
| <p>2. What diseases are included in viral hepatitis?</p> | <p>Viral hepatitis encompasses several types of hepatitis caused by different viruses. The main types are:</p> <ol style="list-style-type: none"> <li>1. Hepatitis A (HAV): This is typically spread through contaminated food or water, or close contact with an infected person. It doesn't usually lead to chronic infection and is preventable through vaccination.</li> <li>2. Hepatitis B (HBV): HBV is transmitted through contact with infected blood, semen, or other body fluids. It can be acute or chronic and can lead to serious liver damage, including cirrhosis and liver cancer. Vaccination is available to prevent HBV infection.</li> <li>3. Hepatitis C (HCV): HCV is primarily spread through blood-to-blood contact, often through sharing needles or other drug paraphernalia. It can also be transmitted through unsafe medical procedures or from mother to baby during childbirth. Chronic HCV infection can cause liver damage over time and increase the risk of liver cancer. There's no vaccine for HCV, but effective treatments are available.</li> <li>4. Hepatitis D (HDV): This virus can only infect individuals already infected with HBV. HDV is transmitted through contact with infected blood or other body fluids. It can lead to more severe liver disease than HBV alone. Vaccination against HBV also protects against HDV infection.</li> <li>5. Hepatitis E (HEV): HEV is primarily spread through consumption of contaminated water or food. It's more common in developing countries and usually causes acute hepatitis. It can be particularly dangerous for pregnant women, leading to severe complications. There's no specific treatment for HEV, but it's often a self-limiting illness.</li> </ol> <p>Each type of viral hepatitis has its own characteristics, modes of transmission, and potential complications, so it's important to understand and differentiate between them for proper diagnosis and management.</p> |
| <p>3. What is a full hepatitis panel?</p>                | <p>A full hepatitis panel is a series of blood tests used to detect and diagnose hepatitis, which is inflammation of the liver typically caused by viral infections. This panel typically includes tests for hepatitis A, hepatitis B, hepatitis C, and</p>                                                                                                                                                                                                                                                                                                                                                                                                                                                                                                                                                                                                                                                                                                                                                                                                                                                                                                                                                                                                                                                                                                                                                                                                                                                                                                                                                                                                                                                                                                                                                                                                                                                                                                                          |

|                                   |                                                                                                                                                                                                                                                                                                                                                                                                                                                                                                                                                                                                                                                                                                                                                                                                                                                                                                                                                                                                            |
|-----------------------------------|------------------------------------------------------------------------------------------------------------------------------------------------------------------------------------------------------------------------------------------------------------------------------------------------------------------------------------------------------------------------------------------------------------------------------------------------------------------------------------------------------------------------------------------------------------------------------------------------------------------------------------------------------------------------------------------------------------------------------------------------------------------------------------------------------------------------------------------------------------------------------------------------------------------------------------------------------------------------------------------------------------|
|                                   | <p>sometimes hepatitis D and E. Each test detects specific antibodies or antigens related to the different types of hepatitis viruses. By analyzing the results of these tests, doctors can determine which type of hepatitis virus is present in a patient's body and assess the severity of the infection. This information is crucial for developing an appropriate treatment plan and monitoring the patient's progress.</p>                                                                                                                                                                                                                                                                                                                                                                                                                                                                                                                                                                           |
| 4. What is hepatitis B virus DNA? | <p>Hepatitis B virus (HBV) DNA refers to the genetic material of the hepatitis B virus. HBV is a partially double-stranded DNA virus belonging to the Hepadnaviridae family. Its genome consists of circular DNA, which is replicated through reverse transcription. This means that the virus uses an RNA intermediate to make DNA copies of its genome inside infected cells.</p> <p>HBV DNA can be detected and quantified in various bodily fluids, such as blood or serum, using molecular biology techniques like polymerase chain reaction (PCR). Measurement of HBV DNA levels is important in diagnosing hepatitis B infection, monitoring disease progression, assessing response to treatment, and determining the risk of transmission to others. High levels of HBV DNA typically indicate active viral replication and a higher risk of liver damage and transmission of the virus.</p>                                                                                                      |
| 5. What is hepatitis C virus RNA? | <p>Hepatitis C virus (HCV) RNA refers to the genetic material of the hepatitis C virus. RNA, or ribonucleic acid, is a type of nucleic acid that is essential for the transmission of genetic information and the synthesis of proteins within cells. In the case of hepatitis C, the virus uses RNA as its genetic blueprint to replicate and produce viral proteins.</p> <p>The presence of HCV RNA in a person's blood indicates an active hepatitis C infection. This RNA can be detected through various laboratory tests, such as polymerase chain reaction (PCR) assays, which amplify and detect specific regions of the virus's RNA genome.</p> <p>Detecting HCV RNA is crucial for diagnosing hepatitis C, monitoring the effectiveness of treatment, and assessing the risk of transmission to others. Additionally, the quantification of HCV RNA levels, known as viral load, can provide valuable information about the severity of the infection and the response to antiviral therapy.</p> |
| 6. What is hepatitis E virus RNA? | <p>Hepatitis E virus (HEV) RNA refers to the genetic material of the hepatitis E virus. HEV is a single-stranded RNA virus</p>                                                                                                                                                                                                                                                                                                                                                                                                                                                                                                                                                                                                                                                                                                                                                                                                                                                                             |

|                                 |                                                                                                                                                                                                                                                                                                                                                                                                                                                                                                                                                                                                                                                                                                                                                                                                                                                                                                                                                                                                                                                                                                                                                                                                                                                                                                                                             |
|---------------------------------|---------------------------------------------------------------------------------------------------------------------------------------------------------------------------------------------------------------------------------------------------------------------------------------------------------------------------------------------------------------------------------------------------------------------------------------------------------------------------------------------------------------------------------------------------------------------------------------------------------------------------------------------------------------------------------------------------------------------------------------------------------------------------------------------------------------------------------------------------------------------------------------------------------------------------------------------------------------------------------------------------------------------------------------------------------------------------------------------------------------------------------------------------------------------------------------------------------------------------------------------------------------------------------------------------------------------------------------------|
|                                 | <p>that belongs to the Hepeviridae family. This virus is primarily responsible for causing hepatitis E, which is a liver infection. HEV RNA contains the genetic instructions necessary for the virus to replicate and produce proteins essential for its survival and proliferation within the host's body. Detection of HEV RNA through molecular techniques like polymerase chain reaction (PCR) is crucial for diagnosing hepatitis E infection and monitoring the viral load in patients.</p>                                                                                                                                                                                                                                                                                                                                                                                                                                                                                                                                                                                                                                                                                                                                                                                                                                          |
| 7. What is chronic hepatitis B? | <p>Chronic hepatitis B is a condition caused by the hepatitis B virus (HBV) persisting in the body for six months or longer. HBV attacks the liver, leading to inflammation and potentially causing liver damage over time. Chronic hepatitis B can vary in severity, ranging from a mild illness to a serious, lifelong condition.</p> <p>Individuals with chronic hepatitis B may experience symptoms such as fatigue, abdominal pain, jaundice (yellowing of the skin and eyes), nausea, and loss of appetite. However, many people with chronic hepatitis B may not experience any symptoms and may not be aware that they are infected.</p> <p>Chronic hepatitis B is diagnosed through blood tests that detect specific antigens and antibodies related to the virus. It's essential for individuals with chronic hepatitis B to receive regular medical monitoring to assess liver health and to reduce the risk of complications such as liver cirrhosis, liver failure, or liver cancer.</p> <p>Treatment for chronic hepatitis B aims to slow the progression of the disease, prevent complications, and reduce the risk of transmitting the virus to others. This may involve antiviral medications, regular monitoring, lifestyle modifications, and vaccination for close contacts to prevent further spread of the virus.</p> |
| 8. What is chronic hepatitis C? | <p>Chronic hepatitis C is a long-term liver infection caused by the hepatitis C virus (HCV). When someone is infected with HCV, their immune system typically cannot clear the virus from their body, leading to a persistent infection. Over time, this can cause inflammation and damage to the liver, leading to serious complications such as liver cirrhosis (scarring), liver failure, and even liver cancer.</p> <p>Chronic hepatitis C often doesn't cause symptoms in its early stages, which can make it difficult to detect. However, as the disease progresses, symptoms may develop, such as fatigue, jaundice (yellowing of the skin and eyes), abdominal</p>                                                                                                                                                                                                                                                                                                                                                                                                                                                                                                                                                                                                                                                                 |

|                                                                      |                                                                                                                                                                                                                                                                                                                                                                                                                                                                                                                                                                                                                                                                                                                                                                                                                                                                                                                                                                                                                                                                                                                                                                                                                                                                                                                                                                                                                                                                                                                                                                                                                            |
|----------------------------------------------------------------------|----------------------------------------------------------------------------------------------------------------------------------------------------------------------------------------------------------------------------------------------------------------------------------------------------------------------------------------------------------------------------------------------------------------------------------------------------------------------------------------------------------------------------------------------------------------------------------------------------------------------------------------------------------------------------------------------------------------------------------------------------------------------------------------------------------------------------------------------------------------------------------------------------------------------------------------------------------------------------------------------------------------------------------------------------------------------------------------------------------------------------------------------------------------------------------------------------------------------------------------------------------------------------------------------------------------------------------------------------------------------------------------------------------------------------------------------------------------------------------------------------------------------------------------------------------------------------------------------------------------------------|
|                                                                      | <p>pain, nausea, and loss of appetite.</p> <p>Treatment for chronic hepatitis C has improved significantly in recent years with the development of direct-acting antiviral medications. These medications can cure the infection in most cases, preventing further liver damage and reducing the risk of complications. It's essential for individuals with chronic hepatitis C to work closely with their healthcare providers to monitor their liver health and discuss treatment options.</p>                                                                                                                                                                                                                                                                                                                                                                                                                                                                                                                                                                                                                                                                                                                                                                                                                                                                                                                                                                                                                                                                                                                           |
| <b>Topic: Risk Factors</b>                                           |                                                                                                                                                                                                                                                                                                                                                                                                                                                                                                                                                                                                                                                                                                                                                                                                                                                                                                                                                                                                                                                                                                                                                                                                                                                                                                                                                                                                                                                                                                                                                                                                                            |
| 9. Under what conditions is one more likely to contract hepatitis A? | <p>Hepatitis A is a contagious liver infection caused by the hepatitis A virus (HAV). It is most commonly spread through the ingestion of contaminated food or water or through close contact with an infected person. Here are some conditions that can increase the likelihood of contracting hepatitis A:</p> <ol style="list-style-type: none"> <li>1. <b>Poor sanitation:</b> Hepatitis A is more common in areas with poor sanitation and hygiene practices, where contaminated water and food are more likely to be consumed.</li> <li>2. <b>Traveling to endemic areas:</b> Traveling to regions with high rates of hepatitis A infection increases the risk of exposure, especially if proper precautions such as vaccination and safe food and water practices are not followed.</li> <li>3. <b>Close contact with an infected person:</b> Hepatitis A can spread through close personal contact with an infected individual, such as living in the same household or engaging in sexual activity.</li> <li>4. <b>Consumption of contaminated food or water:</b> Eating food or drinking water that has been contaminated with the hepatitis A virus can lead to infection. This is more likely to occur in settings where hygiene standards are low, such as in restaurants with poor food handling practices or in areas with inadequate sanitation.</li> <li>5. <b>Engaging in high-risk behaviors:</b> Certain behaviors, such as using illicit drugs (particularly those that involve sharing needles) or engaging in risky sexual practices, can increase the risk of hepatitis A transmission.</li> </ol> |

|                                                                       |                                                                                                                                                                                                                                                                                                                                                                                                                                                                                                                                                                                                                                                                                                                                                                                                                                                                                                                                                                                                                                                                                                                                                                                                                                                                                                                                                                                                                                                                                                                                                                                                                         |
|-----------------------------------------------------------------------|-------------------------------------------------------------------------------------------------------------------------------------------------------------------------------------------------------------------------------------------------------------------------------------------------------------------------------------------------------------------------------------------------------------------------------------------------------------------------------------------------------------------------------------------------------------------------------------------------------------------------------------------------------------------------------------------------------------------------------------------------------------------------------------------------------------------------------------------------------------------------------------------------------------------------------------------------------------------------------------------------------------------------------------------------------------------------------------------------------------------------------------------------------------------------------------------------------------------------------------------------------------------------------------------------------------------------------------------------------------------------------------------------------------------------------------------------------------------------------------------------------------------------------------------------------------------------------------------------------------------------|
|                                                                       | <p>6. <b>**Occupational exposure:**</b> Healthcare workers, daycare workers, and others who come into contact with bodily fluids are at an increased risk of hepatitis A infection if proper infection control measures are not followed.</p> <p>Overall, practicing good hygiene, getting vaccinated, and avoiding high-risk behaviors are important for preventing hepatitis A infection.</p>                                                                                                                                                                                                                                                                                                                                                                                                                                                                                                                                                                                                                                                                                                                                                                                                                                                                                                                                                                                                                                                                                                                                                                                                                         |
| 10. Under what conditions is one more likely to contract hepatitis B? | <p>Hepatitis B is typically contracted through contact with infected blood, semen, or other body fluids. Here are some common scenarios where the risk of contracting hepatitis B is higher:</p> <ol style="list-style-type: none"> <li>1. <b>**Unprotected Sex:**</b> Engaging in sexual activities with an infected partner can transmit the virus. This risk is higher in individuals with multiple sexual partners or those who engage in high-risk sexual behaviors.</li> <li>2. <b>**Sharing Needles:**</b> Sharing needles or syringes for injecting drugs, medications, or even during tattooing or body piercing procedures increases the risk of hepatitis B transmission.</li> <li>3. <b>**Mother to Child Transmission:**</b> Pregnant women infected with hepatitis B can transmit the virus to their babies during childbirth. However, this risk can be significantly reduced through proper medical interventions such as administering the hepatitis B vaccine and hepatitis B immune globulin (HBIG) to the newborn.</li> <li>4. <b>**Occupational Exposure:**</b> Healthcare workers, laboratory technicians, and others who come into contact with blood or body fluids are at a higher risk of contracting hepatitis B if proper safety precautions are not followed.</li> <li>5. <b>**Sharing Personal Items:**</b> Sharing personal items such as razors, toothbrushes, or items contaminated with infected blood can also lead to transmission.</li> <li>6. <b>**Blood Transfusions:**</b> Although rare, receiving blood transfusions or organ transplants from infected donors who</li> </ol> |

|                                                                       |                                                                                                                                                                                                                                                                                                                                                                                                                                                                                                                                                                                                                                                                                                                                                                                                                                                                                                                                                                                                                                                                                                                                                                                                                                                                                                                                                                                      |
|-----------------------------------------------------------------------|--------------------------------------------------------------------------------------------------------------------------------------------------------------------------------------------------------------------------------------------------------------------------------------------------------------------------------------------------------------------------------------------------------------------------------------------------------------------------------------------------------------------------------------------------------------------------------------------------------------------------------------------------------------------------------------------------------------------------------------------------------------------------------------------------------------------------------------------------------------------------------------------------------------------------------------------------------------------------------------------------------------------------------------------------------------------------------------------------------------------------------------------------------------------------------------------------------------------------------------------------------------------------------------------------------------------------------------------------------------------------------------|
|                                                                       | <p>were not screened properly can transmit hepatitis B.</p> <p>7. <b>**Accidental Needle Stick Injuries:**</b> Healthcare workers or individuals in other occupations that involve handling needles may accidentally prick themselves with a needle contaminated with hepatitis B virus-infected blood.</p> <p>To reduce the risk of contracting hepatitis B, it's important to practice safe sex, avoid sharing needles or personal items, get vaccinated, and follow proper infection control procedures, especially in healthcare settings.</p>                                                                                                                                                                                                                                                                                                                                                                                                                                                                                                                                                                                                                                                                                                                                                                                                                                   |
| 11. Under what conditions is one more likely to contract hepatitis E? | <p>Hepatitis E is typically contracted through the consumption of contaminated water or food, particularly in areas with poor sanitation and hygiene practices. Conditions that increase the risk of contracting hepatitis E include:</p> <ol style="list-style-type: none"> <li>1. <b>**Travel to Endemic Areas**</b>: Visiting or living in regions where hepatitis E is prevalent increases the risk of exposure.</li> <li>2. <b>**Contaminated Water**</b>: Drinking water contaminated with the hepatitis E virus, especially in areas with inadequate sanitation facilities.</li> <li>3. <b>**Consumption of Undercooked Meat**</b>: Eating undercooked or raw meat, particularly pork or wild game, that is infected with the hepatitis E virus.</li> <li>4. <b>**Crowded Living Conditions**</b>: Living in overcrowded or unsanitary conditions where the virus can easily spread through close contact with infected individuals or contaminated surfaces.</li> <li>5. <b>**Pregnancy**</b>: Pregnant women are at a higher risk of severe complications if they contract hepatitis E, especially during the third trimester.</li> <li>6. <b>**Immunocompromised Individuals**</b>: People with weakened immune systems, such as those living with HIV/AIDS or undergoing immunosuppressive therapy, are more susceptible to infections, including hepatitis E.</li> </ol> |

|                                                                       |                                                                                                                                                                                                                                                                                                                                                                                                                                                                                                                                                                                                                                                                                                                                                                                                                                                                                                                                                                                                                                                                                                                                                    |
|-----------------------------------------------------------------------|----------------------------------------------------------------------------------------------------------------------------------------------------------------------------------------------------------------------------------------------------------------------------------------------------------------------------------------------------------------------------------------------------------------------------------------------------------------------------------------------------------------------------------------------------------------------------------------------------------------------------------------------------------------------------------------------------------------------------------------------------------------------------------------------------------------------------------------------------------------------------------------------------------------------------------------------------------------------------------------------------------------------------------------------------------------------------------------------------------------------------------------------------|
|                                                                       | <p>7. <b>**Blood Transfusions or Organ Transplants**</b>: Although rare, hepatitis E can be transmitted through blood transfusions or organ transplants from infected donors.</p> <p>8. <b>**Occupational Exposure**</b>: Certain occupations, such as healthcare workers or laboratory technicians handling bodily fluids, may be at an increased risk of exposure to the virus.</p> <p>Preventive measures such as practicing good hygiene, drinking safe water, thoroughly cooking meat, and getting vaccinated (where available) can help reduce the risk of contracting hepatitis E.</p>                                                                                                                                                                                                                                                                                                                                                                                                                                                                                                                                                      |
| 12. Under what conditions is one more likely to contract hepatitis C? | <p>Hepatitis C is primarily transmitted through blood-to-blood contact. Therefore, individuals are at a higher risk of contracting hepatitis C under the following conditions:</p> <p>1. <b>**Injecting Drug Use**</b>: Sharing needles, syringes, or other equipment used to prepare or inject drugs can expose individuals to infected blood.</p> <p>2. <b>**Blood Transfusions or Organ Transplants Before 1992**</b>: Before widespread screening of blood donations for hepatitis C began in 1992, receiving a blood transfusion or organ transplant put individuals at risk of contracting the virus.</p> <p>3. <b>**Healthcare Exposure**</b>: Healthcare workers may be at risk if they are accidentally stuck with a needle or other sharp object that has been contaminated with infected blood.</p> <p>4. <b>**Unprotected Sexual Contact**</b>: While the risk of sexual transmission is lower compared to blood-to-blood contact, it is still possible to contract hepatitis C through unprotected sexual activity, especially among individuals with multiple partners or those engaging in rough sex that could cause bleeding.</p> |



|                                                                       |                                                                                                                                                                                                                                                                                                                                                                                                                                                                                                                                                                                                                                                                                                                                                                                                                                                                                                                                                                                        |
|-----------------------------------------------------------------------|----------------------------------------------------------------------------------------------------------------------------------------------------------------------------------------------------------------------------------------------------------------------------------------------------------------------------------------------------------------------------------------------------------------------------------------------------------------------------------------------------------------------------------------------------------------------------------------------------------------------------------------------------------------------------------------------------------------------------------------------------------------------------------------------------------------------------------------------------------------------------------------------------------------------------------------------------------------------------------------|
|                                                                       | <p>5. <b>**Mother-to-Child Transmission**</b>: There is a risk of transmission from an infected mother to her baby during childbirth, although this is less common than with hepatitis B.</p> <p>6. <b>**Tattoos or Body Piercings**</b>: Getting tattoos or body piercings with unsterilized equipment increases the risk of exposure to infected blood.</p> <p>7. <b>**Sharing Personal Items**</b>: Sharing items such as razors or toothbrushes that may come into contact with blood can also pose a risk.</p> <p>It's important to note that hepatitis C is not spread through casual contact such as hugging, kissing, or sharing utensils and food. Taking precautions such as using sterile needles for injections, practicing safe sex, and avoiding sharing personal items can help reduce the risk of contracting hepatitis C. Additionally, there are effective treatments available for hepatitis C that can cure the infection and prevent long-term complications.</p> |
| 13. Under what conditions is one more likely to contract hepatitis D? | <p>Hepatitis D, also known as delta hepatitis, is a viral infection caused by the hepatitis D virus (HDV). Unlike other types of hepatitis, hepatitis D can only infect individuals who are already infected with the hepatitis B virus (HBV). Therefore, the primary risk factor for contracting hepatitis D is already having a hepatitis B infection.</p> <p>Individuals who are at increased risk of hepatitis B infection are also at higher risk of contracting hepatitis D. These include:</p> <ol style="list-style-type: none"> <li>1. <b>**People with HBV infection:**</b> Since hepatitis D requires the presence of hepatitis B virus to replicate, individuals who are already infected with HBV are at risk of contracting HDV.</li> <li>2. <b>**Injection drug users:**</b> Sharing needles and other injection equipment can expose individuals to both HBV and HDV.</li> </ol>                                                                                       |

|                                                                                                                        |                                                                                                                                                                                                                                                                                                                                                                                                                                                                                                                                                                                                                                                                                                                                                                                                                                                                                                                                                                                                                                                                                                                                                                                                                                                                                                                                                                                                                                    |
|------------------------------------------------------------------------------------------------------------------------|------------------------------------------------------------------------------------------------------------------------------------------------------------------------------------------------------------------------------------------------------------------------------------------------------------------------------------------------------------------------------------------------------------------------------------------------------------------------------------------------------------------------------------------------------------------------------------------------------------------------------------------------------------------------------------------------------------------------------------------------------------------------------------------------------------------------------------------------------------------------------------------------------------------------------------------------------------------------------------------------------------------------------------------------------------------------------------------------------------------------------------------------------------------------------------------------------------------------------------------------------------------------------------------------------------------------------------------------------------------------------------------------------------------------------------|
|                                                                                                                        | <p>3. <b>**People with multiple sexual partners:**</b> Unprotected sexual activity, especially with multiple partners or with someone who has hepatitis B or D, can increase the risk of contracting hepatitis D.</p> <p>4. <b>**Individuals from regions with high prevalence:**</b> Hepatitis D is more common in certain parts of the world, such as sub-Saharan Africa, the Amazon Basin, the Middle East, and some countries in Eastern Europe and Asia.</p> <p>5. <b>**Healthcare workers:**</b> Those who come into contact with blood or body fluids are at increased risk of exposure to HBV and HDV.</p> <p>6. <b>**People receiving hemodialysis:**</b> HDV can be transmitted through contaminated equipment in healthcare settings, including during hemodialysis.</p> <p>7. <b>**Infants born to mothers with HBV infection:**</b> Infants born to mothers who are infected with HBV are at risk of contracting both HBV and HDV during childbirth.</p> <p>Prevention of hepatitis D primarily involves preventing hepatitis B infection through vaccination and avoiding behaviors that can lead to exposure to infected blood or body fluids. Vaccination against hepatitis B is highly effective in preventing both HBV and HDV infections. If someone is already infected with HBV, avoiding activities that can lead to exposure to infected blood or body fluids can help prevent contracting hepatitis D.</p> |
| 14. Is hepatitis B hereditary? My mother has hepatitis B; what should I be aware of? Should I undergo further testing? | <p>Hepatitis B is not hereditary in the sense that it is not passed down from parents to children through genetic material. However, it can be transmitted from an infected mother to her child at birth, known as perinatal transmission. This is the most common way hepatitis B is spread worldwide.</p> <p>Given that your mother has hepatitis B, it's essential to determine whether you were vaccinated as a child. The hepatitis B vaccine is very effective in preventing the infection. If you are unsure about your vaccination status or whether you were infected at birth, it is wise to undergo testing.</p>                                                                                                                                                                                                                                                                                                                                                                                                                                                                                                                                                                                                                                                                                                                                                                                                        |

|                                                                                |                                                                                                                                                                                                                                                                                                                                                                                                                                                                                                                                                                                                                                                                                                                                                                                                                                                                                                                                                                                                                                                                                                                                                                                                                                                                                                                                                                                                                                                                                 |
|--------------------------------------------------------------------------------|---------------------------------------------------------------------------------------------------------------------------------------------------------------------------------------------------------------------------------------------------------------------------------------------------------------------------------------------------------------------------------------------------------------------------------------------------------------------------------------------------------------------------------------------------------------------------------------------------------------------------------------------------------------------------------------------------------------------------------------------------------------------------------------------------------------------------------------------------------------------------------------------------------------------------------------------------------------------------------------------------------------------------------------------------------------------------------------------------------------------------------------------------------------------------------------------------------------------------------------------------------------------------------------------------------------------------------------------------------------------------------------------------------------------------------------------------------------------------------|
|                                                                                | <p>Here are a few steps you should consider:</p> <ol style="list-style-type: none"> <li>1. <b>**Check your vaccination records**</b> to see if you were vaccinated for hepatitis B.</li> <li>2. <b>**Get tested**</b> for hepatitis B. This typically involves a simple blood test to check for the presence of hepatitis B surface antigen (HBsAg) and antibodies.</li> <li>3. <b>**Discuss with your healthcare provider**</b> about whether you need the hepatitis B vaccine or if you should start any preventive measures, especially if you have not been vaccinated.</li> </ol> <p>Regular monitoring and management, if needed, can help control the effects of hepatitis B and reduce the risk of liver disease. Your healthcare provider can give you the best advice tailored to your specific situation.</p>                                                                                                                                                                                                                                                                                                                                                                                                                                                                                                                                                                                                                                                        |
| <b>Topic: Diagnose</b>                                                         |                                                                                                                                                                                                                                                                                                                                                                                                                                                                                                                                                                                                                                                                                                                                                                                                                                                                                                                                                                                                                                                                                                                                                                                                                                                                                                                                                                                                                                                                                 |
| 15. What clinical symptoms should be considered for viral hepatitis diagnosis? | <p>In my role as a chief physician, I would suggest looking out for a range of clinical symptoms when diagnosing viral hepatitis, as the presentation can vary from mild to severe. Here are key symptoms to consider:</p> <ol style="list-style-type: none"> <li>1. <b>**Jaundice**</b>: Yellowing of the skin and the whites of the eyes, which is a direct result of elevated bilirubin levels in the blood.</li> <li>2. <b>**Fatigue**</b>: Extreme tiredness that doesn't improve with rest.</li> <li>3. <b>**Abdominal Pain**</b>: Particularly in the right upper quadrant, where the liver is located.</li> <li>4. <b>**Dark Urine**</b>: Often a darker color than normal, which can be due to bilirubin being excreted through the kidneys.</li> <li>5. <b>**Pale Stools**</b>: Stools might appear lighter in color due to less bilirubin reaching the intestines.</li> <li>6. <b>**Loss of Appetite**</b>: Decreased interest in eating, which may be accompanied by weight loss.</li> <li>7. <b>**Nausea and Vomiting**</b>: Frequent upset stomach, which can sometimes lead to vomiting.</li> <li>8. <b>**Fever**</b>: Although not always present, fever can occur, especially in acute phases.</li> </ol> <p>These symptoms, particularly when they occur together, can suggest viral hepatitis. However, laboratory tests are essential to confirm the diagnosis and differentiate between various types of hepatitis viruses (like hepatitis A, B, C, D,</p> |

|                                                                                |                                                                                                                                                                                                                                                                                                                                                                                                                                                                                                                                                                                                                                                                                                                                                                                                                                                                                                                                                                                                                                                                                                                                                                                                                                                                                                                                                                                                                                                                                                                                                                                                                                                                                                                                                                                                                                         |
|--------------------------------------------------------------------------------|-----------------------------------------------------------------------------------------------------------------------------------------------------------------------------------------------------------------------------------------------------------------------------------------------------------------------------------------------------------------------------------------------------------------------------------------------------------------------------------------------------------------------------------------------------------------------------------------------------------------------------------------------------------------------------------------------------------------------------------------------------------------------------------------------------------------------------------------------------------------------------------------------------------------------------------------------------------------------------------------------------------------------------------------------------------------------------------------------------------------------------------------------------------------------------------------------------------------------------------------------------------------------------------------------------------------------------------------------------------------------------------------------------------------------------------------------------------------------------------------------------------------------------------------------------------------------------------------------------------------------------------------------------------------------------------------------------------------------------------------------------------------------------------------------------------------------------------------|
|                                                                                | and E). Tests typically include liver function tests, viral serologies, and sometimes more specific molecular tests for viral DNA or RNA.                                                                                                                                                                                                                                                                                                                                                                                                                                                                                                                                                                                                                                                                                                                                                                                                                                                                                                                                                                                                                                                                                                                                                                                                                                                                                                                                                                                                                                                                                                                                                                                                                                                                                               |
| 16. What laboratory tests are needed to help doctors diagnose viral hepatitis? | <p>To diagnose viral hepatitis, several laboratory tests are often required to determine the type of hepatitis virus and the extent of liver damage. Here are the key tests commonly used:</p> <ol style="list-style-type: none"> <li>1. <b>Liver Function Tests (LFTs)</b>: These tests measure levels of liver enzymes (such as ALT and AST), bilirubin, and other substances in the blood that indicate how well the liver is functioning.</li> <li>2. <b>Hepatitis Virus Serology</b>: <ul style="list-style-type: none"> <li>- <b>Hepatitis A</b>: IgM anti-HAV antibodies indicate acute hepatitis A infection.</li> <li>- <b>Hepatitis B</b>: Tests include HBsAg, anti-HBs, anti-HBc IgM (indicates recent infection), anti-HBc IgG, and HBeAg. These help distinguish between acute and chronic hepatitis B.</li> <li>- <b>Hepatitis C</b>: Anti-HCV antibodies initially, followed by HCV RNA PCR to confirm active infection.</li> <li>- <b>Hepatitis D</b>: HDV antibodies and HDV RNA, usually conducted if a patient with hepatitis B has unusual clinical features suggesting co-infection.</li> <li>- <b>Hepatitis E</b>: HEV IgM and HEV RNA tests can be used to diagnose acute hepatitis E.</li> </ul> </li> <li>3. <b>PCR (Polymerase Chain Reaction) Tests</b>: These tests detect the RNA or DNA of the hepatitis viruses, confirming active infection, and can also be used to measure viral load, which is helpful in managing the disease.</li> <li>4. <b>Liver Biopsy</b>: In some cases, a biopsy may be necessary to assess the extent of liver damage, although this is less common now due to advancements in non-invasive testing.</li> <li>5. <b>Imaging Tests</b>: Ultrasound, CT scans, or MRIs may be used to look at the liver and surrounding structures for damage or signs of cancer.</li> </ol> |

|                                                                                               |                                                                                                                                                                                                                                                                                                                                                                                                                                                                                                                                                                                                                                                                                                                                                                                                                                                                                                                                                                                                                                                                                                                                                                                                                                                                                                                                                                                                                        |
|-----------------------------------------------------------------------------------------------|------------------------------------------------------------------------------------------------------------------------------------------------------------------------------------------------------------------------------------------------------------------------------------------------------------------------------------------------------------------------------------------------------------------------------------------------------------------------------------------------------------------------------------------------------------------------------------------------------------------------------------------------------------------------------------------------------------------------------------------------------------------------------------------------------------------------------------------------------------------------------------------------------------------------------------------------------------------------------------------------------------------------------------------------------------------------------------------------------------------------------------------------------------------------------------------------------------------------------------------------------------------------------------------------------------------------------------------------------------------------------------------------------------------------|
|                                                                                               | <p>6. <b>**Additional Tests**</b>: Depending on the patient's condition, tests for other markers like autoantibodies (for autoimmune hepatitis) and iron and copper levels (for other liver diseases) might be recommended.</p> <p>These tests provide comprehensive information that helps in accurately diagnosing the type of viral hepatitis and guiding appropriate treatment strategies.</p>                                                                                                                                                                                                                                                                                                                                                                                                                                                                                                                                                                                                                                                                                                                                                                                                                                                                                                                                                                                                                     |
| 17. During a routine physical examination, is it necessary to perform a full hepatitis panel? | <p>As a chief physician, I would say that the necessity of performing a full hepatitis panel during a routine physical examination depends on several factors, including the patient's risk factors, medical history, and any presenting symptoms. Generally, a full hepatitis panel is not included in a standard physical examination unless there are specific reasons to consider it.</p> <p>Here are a few scenarios where testing might be warranted:</p> <ol style="list-style-type: none"> <li>1. <b>**Risk Factors**</b>: If the patient has risk factors such as a history of intravenous drug use, high-risk sexual behaviors, or a medical history that includes liver disease, a hepatitis panel may be recommended.</li> <li>2. <b>**Symptoms**</b>: Symptoms such as jaundice, severe fatigue, or abdominal pain might prompt testing for hepatitis.</li> <li>3. <b>**Occupational Exposure**</b>: Healthcare workers or others exposed to blood products may benefit from routine screenings.</li> <li>4. <b>**Previous Positive Tests**</b>: If the patient has previously tested positive for any form of hepatitis, monitoring the disease might include periodic testing.</li> </ol> <p>For most patients without these risk factors, a full hepatitis panel is not routinely necessary during a physical examination. It's more about targeted screening based on individual risk assessment.</p> |
| 18. Under what circumstances should co-infection with hepatitis D be considered?              | <p>In the role of a chief physician, I would advise considering hepatitis D co-infection primarily in individuals who are already infected with hepatitis B, as hepatitis D (also known as delta hepatitis) is a satellite virus that can only infect persons already infected by the hepatitis B virus (HBV).</p> <p>Here are specific circumstances under which hepatitis D co-infection should be considered:</p>                                                                                                                                                                                                                                                                                                                                                                                                                                                                                                                                                                                                                                                                                                                                                                                                                                                                                                                                                                                                   |

|                                                                        |                                                                                                                                                                                                                                                                                                                                                                                                                                                                                                                                                                                                                                                                                                                                                                                                                                                                                                                                                                                                                                                                                                                                                                                                                         |
|------------------------------------------------------------------------|-------------------------------------------------------------------------------------------------------------------------------------------------------------------------------------------------------------------------------------------------------------------------------------------------------------------------------------------------------------------------------------------------------------------------------------------------------------------------------------------------------------------------------------------------------------------------------------------------------------------------------------------------------------------------------------------------------------------------------------------------------------------------------------------------------------------------------------------------------------------------------------------------------------------------------------------------------------------------------------------------------------------------------------------------------------------------------------------------------------------------------------------------------------------------------------------------------------------------|
|                                                                        | <p>1. <b>Existing HBV Infection</b>: Anyone with chronic or acute hepatitis B should be evaluated for hepatitis D, especially if their disease is worsening or not responding to treatment as expected.</p> <p>2. <b>High-Risk Groups</b>: This includes individuals who have high-risk behaviors such as intravenous drug use, those with multiple sexual partners, or men who have sex with men (MSM), all of whom are at a higher risk for both HBV and HDV.</p> <p>3. <b>Regions with High Prevalence</b>: Consider testing for HDV in individuals from areas where hepatitis D is common, which includes parts of the Mediterranean, the Middle East, Central Asia, and Africa.</p> <p>4. <b>Unexplained Severe or Fulminant Hepatitis</b>: If a patient with HBV infection experiences unusually severe liver disease or fulminant hepatitis, testing for HDV co-infection is warranted.</p> <p>5. <b>Non-responders to HBV Therapy</b>: Patients who do not respond to HBV antiviral therapy might be co-infected with HDV, which can affect the efficacy of treatment.</p> <p>Testing for HDV can help guide more effective management strategies and provide a clearer prognosis for affected individuals.</p> |
| 19. Under what circumstances should chronic hepatitis E be considered? | <p>Chronic hepatitis E should be considered primarily in immunocompromised individuals, such as organ transplant recipients, people with HIV/AIDS, and those receiving chemotherapy or immunosuppressive therapy. In these patients, the immune system may not be able to clear the hepatitis E virus effectively, leading to chronic infection. Additionally, chronic hepatitis E is more likely to be observed with hepatitis E virus genotype 3 or 4 infections. It's important to consider this condition if there are persistent or unexplained liver test abnormalities in these populations, particularly if they have a history of consuming undercooked pork or game meat, or if they have been exposed to sources of the virus through travel or other means.</p>                                                                                                                                                                                                                                                                                                                                                                                                                                             |

|                                                                                                                                              |                                                                                                                                                                                                                                                                                                                                                                                                                                                                                                                                                                                                                                                                                                                                                                                                                                                                                                                                                                                                                                                                                                    |
|----------------------------------------------------------------------------------------------------------------------------------------------|----------------------------------------------------------------------------------------------------------------------------------------------------------------------------------------------------------------------------------------------------------------------------------------------------------------------------------------------------------------------------------------------------------------------------------------------------------------------------------------------------------------------------------------------------------------------------------------------------------------------------------------------------------------------------------------------------------------------------------------------------------------------------------------------------------------------------------------------------------------------------------------------------------------------------------------------------------------------------------------------------------------------------------------------------------------------------------------------------|
| <p>20. Does a positive hepatitis A virus antibody test definitely mean one has hepatitis A?</p>                                              | <p>Not necessarily. A positive hepatitis A virus (HAV) antibody test indicates exposure to the virus, but it doesn't necessarily mean that one currently has an active infection. There are two types of antibodies detected by this test: IgM and IgG.</p> <p>1. <b>**IgM antibodies**</b>: These are produced first when the body responds to a hepatitis A infection. The presence of IgM antibodies typically indicates a recent exposure to HAV and suggests an acute, or current, infection. IgM antibodies generally appear in the blood within a few weeks after infection and are usually detectable for up to 6 months.</p> <p>2. <b>**IgG antibodies**</b>: These are produced later and indicate past exposure to the virus. The presence of IgG antibodies means the person has either had a previous infection or has been vaccinated against hepatitis A. These antibodies are usually present for life and provide immunity against future infections.</p> <p>Therefore, interpreting a positive HAV antibody test depends on which type of antibody (IgM or IgG) is detected.</p> |
| <p>21. Does a positive hepatitis C virus antibody test definitely mean one has hepatitis C?</p>                                              | <p>A positive hepatitis C virus (HCV) antibody test indicates that a person has been exposed to the hepatitis C virus at some point in their life. However, it does not definitively mean that they currently have an active infection. The presence of antibodies means that the person's immune system has responded to the virus, but the virus itself may no longer be present. Approximately 15-25% of people who are infected with HCV clear the virus from their bodies without treatment.</p> <p>To determine if there is an active infection, a follow-up test, typically a nucleic acid test for HCV RNA, is needed. This test detects the presence of the virus's genetic material in the blood and can confirm whether an active infection exists. If the RNA test is positive, it indicates that the person has an ongoing HCV infection and may need treatment. If it is negative, it means that there is no current infection, although they were exposed to the virus in the past.</p>                                                                                             |
| <p>22. How should the results of the "hepatitis B panel" be interpreted? What does it mean if the hepatitis B core antibody is positive?</p> | <p>As a chief physician, I can help you understand the results of a hepatitis B panel. This panel is a series of blood tests used to detect an infection with hepatitis B virus (HBV) in various stages. It typically includes the following markers:</p> <p>1. <b>**HBsAg (Hepatitis B surface antigen)**</b> - Detects current hepatitis B infection. A positive result indicates that the</p>                                                                                                                                                                                                                                                                                                                                                                                                                                                                                                                                                                                                                                                                                                   |

|                                                                                        |                                                                                                                                                                                                                                                                                                                                                                                                                                                                                                                                                                                                                                                                                                                                                                                                                                                                                                                                                                                                                                                                                                                                                                                                                                                                                                                                                                                                                                                                                                                                                                             |
|----------------------------------------------------------------------------------------|-----------------------------------------------------------------------------------------------------------------------------------------------------------------------------------------------------------------------------------------------------------------------------------------------------------------------------------------------------------------------------------------------------------------------------------------------------------------------------------------------------------------------------------------------------------------------------------------------------------------------------------------------------------------------------------------------------------------------------------------------------------------------------------------------------------------------------------------------------------------------------------------------------------------------------------------------------------------------------------------------------------------------------------------------------------------------------------------------------------------------------------------------------------------------------------------------------------------------------------------------------------------------------------------------------------------------------------------------------------------------------------------------------------------------------------------------------------------------------------------------------------------------------------------------------------------------------|
|                                                                                        | <p>person is infectious.</p> <p>2. <b>**Anti-HBs (Hepatitis B surface antibody)**</b> - Indicates immunity to hepatitis B, either through vaccination or recovery from a past infection.</p> <p>3. <b>**Anti-HBc (Hepatitis B core antibody)**</b> - Appears at the onset of symptoms in acute hepatitis B and persists for life. A positive test can indicate either current or past infection.</p> <ul style="list-style-type: none"> <li>- <b>**IgM Anti-HBc**</b> - Indicates recent infection with hepatitis B (usually within the last 6 months).</li> <li>- <b>**IgG Anti-HBc**</b> - Indicates past infection and can be present in those who have either cleared the virus or have a chronic infection.</li> </ul> <p>If the hepatitis B core antibody (Anti-HBc) is positive, it typically requires further context from the other markers:</p> <ul style="list-style-type: none"> <li>- <b>**If HBsAg is also positive**</b>, this could indicate an acute or chronic HBV infection.</li> <li>- <b>**If Anti-HBs is positive and HBsAg is negative**</b>, this likely means a past infection and recovery, or it could mean the individual is in the "window period" of an acute infection where the surface antigen has cleared but the surface antibody has not yet appeared.</li> </ul> <p>Each result should be interpreted in the context of other test results and the clinical history of the patient. It's crucial to consult with a healthcare provider to understand the specific implications of test results and to receive personalized advice.</p> |
| 23. Under what circumstances should screening for hepatitis C antibodies be performed? | <p>As a chief physician, I would recommend screening for hepatitis C antibodies in several circumstances based on current medical guidelines:</p> <p>1. <b>**Risk Factors Exposure**</b>: People who have been exposed to certain risk factors should be screened. This includes:</p> <ul style="list-style-type: none"> <li>- Individuals who have ever injected drugs, including those who injected once or a few times many years ago.</li> <li>- People with HIV infection.</li> <li>- Those who have received hemodialysis treatment for a long period.</li> <li>- People who received clotting factor concentrates before 1987 or blood transfusions or organ transplants before</li> </ul>                                                                                                                                                                                                                                                                                                                                                                                                                                                                                                                                                                                                                                                                                                                                                                                                                                                                           |



|                                                                        |                                                                                                                                                                                                                                                                                                                                                                                                                                                                                                                                                                                                                                                                                                                                                                                                                                                                                                                                                                                                                                                                                                                                                                                                                                                                                                         |
|------------------------------------------------------------------------|---------------------------------------------------------------------------------------------------------------------------------------------------------------------------------------------------------------------------------------------------------------------------------------------------------------------------------------------------------------------------------------------------------------------------------------------------------------------------------------------------------------------------------------------------------------------------------------------------------------------------------------------------------------------------------------------------------------------------------------------------------------------------------------------------------------------------------------------------------------------------------------------------------------------------------------------------------------------------------------------------------------------------------------------------------------------------------------------------------------------------------------------------------------------------------------------------------------------------------------------------------------------------------------------------------|
|                                                                        | <p>July 1992.</p> <ul style="list-style-type: none"> <li>- Healthcare, emergency medical, and public safety workers after needlesticks, sharps, or mucosal exposures to HCV-positive blood.</li> </ul> <p>2. <b>**Birth Cohort Screening**</b>: The CDC recommends one-time testing for hepatitis C without prior ascertainment of risk for individuals born between 1945 and 1965, as this group is at higher risk.</p> <p>3. <b>**Healthcare Findings**</b>: Testing should be conducted in individuals with:</p> <ul style="list-style-type: none"> <li>- Signs or symptoms of liver disease (e.g., abnormal liver enzyme tests).</li> <li>- Unexplained persistent elevations in serum alanine aminotransferase levels (ALT).</li> </ul> <p>4. <b>**Other Considerations**</b>: Other individuals who might be considered for screening include:</p> <ul style="list-style-type: none"> <li>- Children born to hepatitis C virus-positive mothers.</li> <li>- Sexual partners of hepatitis C virus-positive individuals, although the risk of transmission is low unless there is contact with blood.</li> </ul> <p>Screening can prevent the progression of the disease through early detection and management, reducing the risk of severe liver diseases such as cirrhosis and liver cancer.</p> |
| 24. Under what circumstances should chronic hepatitis E be considered? | <p>Chronic hepatitis E should be considered under specific circumstances, particularly in individuals who have a compromised immune system. Here are a few key scenarios:</p> <p>1. <b>**Immunocompromised Patients**</b>: This includes patients who have received organ transplants, those undergoing chemotherapy, or individuals with HIV/AIDS. In these groups, the immune system may not clear the hepatitis E virus effectively, leading to chronic infection.</p> <p>2. <b>**Persistent Symptoms**</b>: If a patient continues to exhibit symptoms of hepatitis, such as jaundice, fatigue, and</p>                                                                                                                                                                                                                                                                                                                                                                                                                                                                                                                                                                                                                                                                                             |

|                                                               |                                                                                                                                                                                                                                                                                                                                                                                                                                                                                                                                                                                                                                                                                                                                                                                                                                                                                                                                                                                                                                                                                                                                                  |
|---------------------------------------------------------------|--------------------------------------------------------------------------------------------------------------------------------------------------------------------------------------------------------------------------------------------------------------------------------------------------------------------------------------------------------------------------------------------------------------------------------------------------------------------------------------------------------------------------------------------------------------------------------------------------------------------------------------------------------------------------------------------------------------------------------------------------------------------------------------------------------------------------------------------------------------------------------------------------------------------------------------------------------------------------------------------------------------------------------------------------------------------------------------------------------------------------------------------------|
|                                                               | <p>elevated liver enzymes, for more than six months, chronic hepatitis E could be a possibility.</p> <p>3. <b>**Geographical Exposure**</b>: In areas where hepatitis E is endemic, especially regions with poor sanitation where the virus is typically spread through contaminated water, chronic hepatitis E should be considered if symptoms persist.</p> <p>4. <b>**Unexplained Chronic Liver Disease**</b>: In cases where other common causes of chronic liver disease (like hepatitis B and C, alcoholic liver disease, and non-alcoholic fatty liver disease) have been ruled out, testing for hepatitis E might be warranted.</p> <p>Testing for HEV RNA in the blood and liver can help confirm the diagnosis of chronic hepatitis E, particularly in these high-risk groups. It's important to monitor these patients closely and consider antiviral treatment options, as chronic HEV can lead to serious liver complications.</p>                                                                                                                                                                                                  |
| 25. What tests can definitively diagnose chronic hepatitis E? | <p>Chronic hepatitis E is diagnosed primarily in individuals who are immunocompromised, such as those with organ transplants, HIV, or those on chemotherapy. To definitively diagnose chronic hepatitis E, several tests can be utilized:</p> <p>1. <b>**HEV RNA Test**</b>: This is the most definitive test. It detects the presence of the hepatitis E virus RNA in the blood or stool, confirming active infection. A series of positive tests over a period confirms chronic infection.</p> <p>2. <b>**Anti-HEV IgM and IgG Tests**</b>: These tests detect antibodies produced in response to HEV infection. Anti-HEV IgM indicates a recent infection, while IgG indicates past exposure. However, in chronic cases, these antibody tests might not always provide conclusive evidence of ongoing infection.</p> <p>3. <b>**Liver Function Tests (LFTs)**</b>: While not specific to hepatitis E, LFTs can show elevated liver enzymes, which suggest liver inflammation consistent with hepatitis.</p> <p>4. <b>**Ultrasound and Liver Biopsy**</b>: These can be supportive in diagnosing the extent of liver damage and confirming</p> |

|                                                                                 |                                                                                                                                                                                                                                                                                                                                                                                                                                                                                                                                                                                                                                                                                                                                                                                                                                                                                                                                                                                                                                                                                                                                                                                                                                                                                                                                                                          |
|---------------------------------------------------------------------------------|--------------------------------------------------------------------------------------------------------------------------------------------------------------------------------------------------------------------------------------------------------------------------------------------------------------------------------------------------------------------------------------------------------------------------------------------------------------------------------------------------------------------------------------------------------------------------------------------------------------------------------------------------------------------------------------------------------------------------------------------------------------------------------------------------------------------------------------------------------------------------------------------------------------------------------------------------------------------------------------------------------------------------------------------------------------------------------------------------------------------------------------------------------------------------------------------------------------------------------------------------------------------------------------------------------------------------------------------------------------------------|
|                                                                                 | <p>chronic liver disease, though they are not specific for diagnosing hepatitis E itself.</p> <p>It's important to perform these tests under medical guidance and often in combination to accurately diagnose chronic hepatitis E.</p>                                                                                                                                                                                                                                                                                                                                                                                                                                                                                                                                                                                                                                                                                                                                                                                                                                                                                                                                                                                                                                                                                                                                   |
| <b>Topic: Prevention and Treatment</b>                                          |                                                                                                                                                                                                                                                                                                                                                                                                                                                                                                                                                                                                                                                                                                                                                                                                                                                                                                                                                                                                                                                                                                                                                                                                                                                                                                                                                                          |
| 26. If someone in the family has viral hepatitis, how should others prevent it? | <p>As a chief physician, I would emphasize the importance of following key preventive measures if someone in your family is diagnosed with viral hepatitis:</p> <ol style="list-style-type: none"> <li>1. <b>**Vaccination**</b>: Ensure all family members are vaccinated against hepatitis A and B. There is currently no vaccine for hepatitis C, but protection against A and B is crucial.</li> <li>2. <b>**Hygiene Practices**</b>: Practice good hygiene habits such as thorough handwashing with soap and water, especially after using the bathroom, changing diapers, and before preparing or eating food.</li> <li>3. <b>**Avoid Shared Personal Items**</b>: Do not share personal items that might be contaminated with blood, including toothbrushes, razors, nail clippers, and grooming items.</li> <li>4. <b>**Food Safety**</b>: Be careful with food preparation. Wash all fruits and vegetables thoroughly and ensure all seafood and meat are properly cooked.</li> <li>5. <b>**Use Protective Barriers**</b>: Use gloves if you need to handle any materials (such as bandages, tissues, or linens) that might be contaminated with bodily fluids.</li> <li>6. <b>**Clean and Disinfect**</b>: Regularly clean and disinfect surfaces and objects that may be contaminated with virus particles, especially in areas like the bathroom.</li> </ol> |

|                                                 |                                                                                                                                                                                                                                                                                                                                                                                                                                                                                                                                                                                                                                                                                                                                                                                                                                                                                                                                                                                                                                                                                                                                                                                                                                                                                                                                                                                                                                                                                                                                                                                               |
|-------------------------------------------------|-----------------------------------------------------------------------------------------------------------------------------------------------------------------------------------------------------------------------------------------------------------------------------------------------------------------------------------------------------------------------------------------------------------------------------------------------------------------------------------------------------------------------------------------------------------------------------------------------------------------------------------------------------------------------------------------------------------------------------------------------------------------------------------------------------------------------------------------------------------------------------------------------------------------------------------------------------------------------------------------------------------------------------------------------------------------------------------------------------------------------------------------------------------------------------------------------------------------------------------------------------------------------------------------------------------------------------------------------------------------------------------------------------------------------------------------------------------------------------------------------------------------------------------------------------------------------------------------------|
|                                                 | <p>7. <b>**Be Cautious with Blood and Body Fluids**</b>: Exercise caution when in contact with blood and other body fluids. This includes avoiding contact with blood during first aid and using barriers like gloves.</p> <p>By following these guidelines, family members can significantly reduce their risk of contracting hepatitis from an infected relative.</p>                                                                                                                                                                                                                                                                                                                                                                                                                                                                                                                                                                                                                                                                                                                                                                                                                                                                                                                                                                                                                                                                                                                                                                                                                       |
| <p>27. What harm can viral hepatitis cause?</p> | <p>Viral hepatitis, which encompasses several viral infections including hepatitis A, B, C, D, and E, can lead to various serious health issues. The specific risks and outcomes can vary based on the type of hepatitis virus. Here are some potential harms caused by viral hepatitis:</p> <ol style="list-style-type: none"> <li>1. <b>**Liver Damage**</b>: All types of viral hepatitis can cause inflammation of the liver, leading to damage and impaired liver function. Chronic infection, especially with hepatitis B or C, can lead to progressive liver damage and scarring (cirrhosis).</li> <li>2. <b>**Cirrhosis**</b>: Chronic hepatitis B and C are particularly known for leading to cirrhosis, where normal liver tissue is replaced by scar tissue, severely impairing liver function.</li> <li>3. <b>**Liver Cancer**</b>: Both hepatitis B and C significantly increase the risk of developing hepatocellular carcinoma, a common type of liver cancer.</li> <li>4. <b>**Liver Failure**</b>: Severe cases of hepatitis, especially acute infections that progress rapidly, can lead to acute liver failure, a life-threatening condition requiring urgent medical care.</li> <li>5. <b>**Other Health Issues**</b>: Chronic hepatitis can also be associated with other health problems such as kidney disease, blood disorders, and immune system disorders, depending on the type and severity of the infection.</li> <li>6. <b>**Transmission to Others**</b>: Viral hepatitis can be contagious, with each type having different modes of transmission,</li> </ol> |

|                                                                                                                                                                       |                                                                                                                                                                                                                                                                                                                                                                                                                                                                                                                                                                                                                                                                                                                                                                                                                                                                                                                                                                                                                                                                                                                                                                                                                                                                                                                                                                                                                                                                                                                                                                                                                                                                                                                                                           |
|-----------------------------------------------------------------------------------------------------------------------------------------------------------------------|-----------------------------------------------------------------------------------------------------------------------------------------------------------------------------------------------------------------------------------------------------------------------------------------------------------------------------------------------------------------------------------------------------------------------------------------------------------------------------------------------------------------------------------------------------------------------------------------------------------------------------------------------------------------------------------------------------------------------------------------------------------------------------------------------------------------------------------------------------------------------------------------------------------------------------------------------------------------------------------------------------------------------------------------------------------------------------------------------------------------------------------------------------------------------------------------------------------------------------------------------------------------------------------------------------------------------------------------------------------------------------------------------------------------------------------------------------------------------------------------------------------------------------------------------------------------------------------------------------------------------------------------------------------------------------------------------------------------------------------------------------------|
|                                                                                                                                                                       | <p>such as through contaminated food and water (hepatitis A and E), blood and bodily fluids (hepatitis B, C, and D), which can lead to outbreaks and infecting others, particularly in settings with poor sanitation or shared use of needles.</p> <p>Preventative measures such as vaccinations (for hepatitis A and B), safe practices regarding blood and body fluids, and proper sanitation can help reduce the spread and impact of hepatitis infections. Treatment varies depending on the type of hepatitis but may include antiviral medications, lifestyle changes, and in severe cases, liver transplantation.</p>                                                                                                                                                                                                                                                                                                                                                                                                                                                                                                                                                                                                                                                                                                                                                                                                                                                                                                                                                                                                                                                                                                                              |
| 28. If a family member has hepatitis B, how often should others check for hepatitis B surface antibodies? Under what circumstances should vaccinations be considered? | <p>In situations where a family member has hepatitis B, it's important for other family members and close contacts to be evaluated for their risk of infection and take preventive measures. Here are some guidelines to consider:</p> <ol style="list-style-type: none"> <li>1. <b>Screening for Hepatitis B Surface Antibodies (Anti-HBs):</b> <ul style="list-style-type: none"> <li>- <b>Initial Screening:</b> All close household contacts should initially be screened for hepatitis B surface antibodies (anti-HBs) and surface antigen (HBsAg). This helps determine if they have been infected or have immunity either from past infection or vaccination.</li> <li>- <b>Follow-up Testing:</b> If initially not immune (i.e., anti-HBs negative), further testing should be considered based on the guidance of a healthcare provider. Periodic testing might be recommended in cases where ongoing exposure to the virus is likely.</li> </ul> </li> <li>2. <b>Vaccination Considerations:</b> <ul style="list-style-type: none"> <li>- <b>Non-immune Family Members:</b> If a family member tests negative for both HBsAg and anti-HBs, they do not have hepatitis B and are not immune. Vaccination is strongly recommended to prevent infection. The typical vaccination schedule includes doses at 0, 1, and 6 months.</li> <li>- <b>Post-vaccination Testing:</b> After completing the vaccination series, testing for anti-HBs can verify if adequate immunity (generally defined as an anti-HBs level of at least 10 mIU/mL) has been achieved. This is particularly important for those who continue to have close contact with an infected person.</li> </ul> </li> <li>3. <b>Circumstances for Enhanced Precautions:</b></li> </ol> |

|                                                                        |                                                                                                                                                                                                                                                                                                                                                                                                                                                                                                                                                                                                                                                                                                                                                                                                                                                                                                                                                                                                                                                                                                                                                                                                                                                                                              |
|------------------------------------------------------------------------|----------------------------------------------------------------------------------------------------------------------------------------------------------------------------------------------------------------------------------------------------------------------------------------------------------------------------------------------------------------------------------------------------------------------------------------------------------------------------------------------------------------------------------------------------------------------------------------------------------------------------------------------------------------------------------------------------------------------------------------------------------------------------------------------------------------------------------------------------------------------------------------------------------------------------------------------------------------------------------------------------------------------------------------------------------------------------------------------------------------------------------------------------------------------------------------------------------------------------------------------------------------------------------------------|
|                                                                        | <p>- <b>**Living in the Same Household:**</b> Since hepatitis B can be transmitted through direct contact with blood and bodily fluids, household members of individuals with hepatitis B should consider vaccination and regular screenings as part of their routine health care.</p> <p>- <b>**Infants Born to Infected Mothers:**</b> Infants born to hepatitis B positive mothers should receive hepatitis B immune globulin (HBIG) and the first dose of the hepatitis B vaccine within 12 hours of birth, followed by the remaining doses of the vaccine series according to a prescribed schedule.</p> <p>It's crucial for family members of individuals with hepatitis B to consult healthcare providers for personalized advice and to discuss the most appropriate measures to prevent infection, including the need for vaccination and the frequency of antibody testing.</p>                                                                                                                                                                                                                                                                                                                                                                                                    |
| 29. If I have viral hepatitis, what dietary precautions should I take? | <p>In the case of viral hepatitis, it's crucial to follow a balanced diet that supports liver health and the immune system. Here are some general dietary precautions you might consider:</p> <ol style="list-style-type: none"> <li>1. <b>**Avoid Alcohol and Toxins**</b>: Alcohol can be particularly harmful to an already compromised liver. It's important to avoid it completely. Also, limit exposure to other liver toxins, including certain medications and environmental toxins.</li> <li>2. <b>**Limit Fat Intake**</b>: Eating foods that are high in fat can put additional strain on your liver. Opt for lean proteins such as fish, chicken, and legumes. Avoid deep-fried and heavily processed foods.</li> <li>3. <b>**Stay Hydrated**</b>: Drinking plenty of fluids, especially water, helps your body flush out toxins.</li> <li>4. <b>**Eat Small, Frequent Meals**</b>: Eating regular, small meals can help maintain consistent energy levels and prevent the liver from becoming overloaded.</li> <li>5. <b>**Incorporate Fruits and Vegetables**</b>: These are high in nutrients and antioxidants, which can help support the immune system and overall health. Focus on consuming a variety of colors to maximize the intake of different nutrients.</li> </ol> |

|                                                                               |                                                                                                                                                                                                                                                                                                                                                                                                                                                                                                                                                                                                                                                                                                                                                                                                                                                                                                                                                                                                                                                                                                                                  |
|-------------------------------------------------------------------------------|----------------------------------------------------------------------------------------------------------------------------------------------------------------------------------------------------------------------------------------------------------------------------------------------------------------------------------------------------------------------------------------------------------------------------------------------------------------------------------------------------------------------------------------------------------------------------------------------------------------------------------------------------------------------------------------------------------------------------------------------------------------------------------------------------------------------------------------------------------------------------------------------------------------------------------------------------------------------------------------------------------------------------------------------------------------------------------------------------------------------------------|
|                                                                               | <p>6. <b>**Choose Whole Grains**</b>: These provide essential nutrients and are digested more slowly, which can help maintain stable blood sugar levels.</p> <p>7. <b>**Monitor Salt and Sugar Intake**</b>: Excessive salt can lead to water retention and liver burden. Similarly, too much sugar can stress the liver as it works to metabolize it.</p> <p>8. <b>**Consider Supplements Carefully**</b>: Some vitamins and herbal supplements can harm the liver. Always consult with your healthcare provider before starting any new supplements.</p> <p>Each individual's situation can vary, especially depending on the type and severity of hepatitis, so it's important to work with a healthcare provider or a dietitian to tailor dietary choices to your specific needs.</p>                                                                                                                                                                                                                                                                                                                                        |
| 30. I have chronic hepatitis B; what should I pay attention to in daily life? | <p>Managing chronic hepatitis B involves several important lifestyle considerations to help control the virus and maintain your overall health:</p> <ol style="list-style-type: none"> <li>1. <b>**Regular Medical Follow-up**</b>: Regular visits to your healthcare provider are crucial. They will monitor your liver function and viral load through blood tests and check for any progression in liver damage.</li> <li>2. <b>**Medication Adherence**</b>: If you are prescribed antiviral medications, it's important to take them exactly as directed to help control the virus and prevent liver damage.</li> <li>3. <b>**Diet and Nutrition**</b>: Eat a balanced diet rich in fruits, vegetables, whole grains, and lean proteins. Avoid raw or undercooked shellfish, which can harbor viruses and bacteria that might be harmful to your liver.</li> <li>4. <b>**Limit Alcohol and Avoid Toxins**</b>: Alcohol can accelerate liver damage. It is advisable to avoid alcohol or discuss your consumption limits with your doctor. Also, be cautious with the use of medications, supplements, and herbal</li> </ol> |

|                                                                                                               |                                                                                                                                                                                                                                                                                                                                                                                                                                                                                                                                                                                                                                                                                                                                                                                                                                                                                                                                                                                                                                                                                                                                                                                                                                                                                                                                                                 |
|---------------------------------------------------------------------------------------------------------------|-----------------------------------------------------------------------------------------------------------------------------------------------------------------------------------------------------------------------------------------------------------------------------------------------------------------------------------------------------------------------------------------------------------------------------------------------------------------------------------------------------------------------------------------------------------------------------------------------------------------------------------------------------------------------------------------------------------------------------------------------------------------------------------------------------------------------------------------------------------------------------------------------------------------------------------------------------------------------------------------------------------------------------------------------------------------------------------------------------------------------------------------------------------------------------------------------------------------------------------------------------------------------------------------------------------------------------------------------------------------|
|                                                                                                               | <p>remedies that can harm the liver.</p> <p>5. <b>**Vaccinations**</b>: Stay up-to-date with vaccinations, including those for hepatitis A, which can further damage the liver in those with hepatitis B.</p> <p>6. <b>**Exercise Regularly**</b>: Engaging in regular physical activity helps maintain a healthy weight, which is beneficial for liver health.</p> <p>7. <b>**Monitor for Liver Complications**</b>: Be alert for symptoms of liver complications such as jaundice, abdominal pain, and unusual changes in bowel movements or urine color.</p> <p>8. <b>**Prevent Transmission**</b>: Hepatitis B is transmitted through bodily fluids. It is important to use barriers during sexual activity, avoid sharing needles, and ensure that any blood spills are cleaned up safely and hygienically.</p> <p>9. <b>**Support Networks**</b>: Consider joining a support group where you can connect with others facing similar challenges, which can provide emotional support and practical advice on managing the condition.</p> <p>10. <b>**Mental Health**</b>: Managing a chronic illness can be stressful. If you find yourself feeling overwhelmed, consider seeking support from a mental health professional.</p> <p>By adhering to these guidelines, you can better manage your health and minimize the impact of chronic hepatitis B.</p> |
| 31. I have chronic hepatitis B and it's controlled with medication; what indicators should I regularly check? | <p>Managing chronic hepatitis B effectively involves monitoring several key indicators to ensure the disease remains under control and to assess the health of your liver. Here are some important factors you should regularly check:</p> <p>1. <b>**Viral Load (HBV DNA)**</b>: This test measures the amount of hepatitis B virus in your blood. It helps determine how actively the virus is replicating. Regular monitoring can help assess how well your medication is controlling the virus.</p>                                                                                                                                                                                                                                                                                                                                                                                                                                                                                                                                                                                                                                                                                                                                                                                                                                                         |



|                                                                                                                          |                                                                                                                                                                                                                                                                                                                                                                                                                                                                                                                                                                                                                                                                                                                                                                                                                                                                                                                                                                                                                                                                                                                                                                                                                                                                                                                                                                                                                                                                                                                                                                                             |
|--------------------------------------------------------------------------------------------------------------------------|---------------------------------------------------------------------------------------------------------------------------------------------------------------------------------------------------------------------------------------------------------------------------------------------------------------------------------------------------------------------------------------------------------------------------------------------------------------------------------------------------------------------------------------------------------------------------------------------------------------------------------------------------------------------------------------------------------------------------------------------------------------------------------------------------------------------------------------------------------------------------------------------------------------------------------------------------------------------------------------------------------------------------------------------------------------------------------------------------------------------------------------------------------------------------------------------------------------------------------------------------------------------------------------------------------------------------------------------------------------------------------------------------------------------------------------------------------------------------------------------------------------------------------------------------------------------------------------------|
|                                                                                                                          | <p>2. <b>Liver Enzymes (ALT and AST):</b> These enzymes are released into your bloodstream when your liver is damaged. Regular testing can help track liver inflammation and damage.</p> <p>3. <b>Hepatitis B e Antigen (HBeAg) and Antibody (Anti-HBe):</b> These markers help determine the state of the virus, whether it's actively replicating and your infectiousness. A change in these markers can indicate a change in the disease's activity.</p> <p>4. <b>Liver Function Tests:</b> This group of tests assesses the overall function of the liver, including bilirubin, albumin, and prothrombin time, which can indicate how well your liver is performing its necessary functions.</p> <p>5. <b>Alpha-fetoprotein (AFP):</b> This test is used to screen for liver cancer, which people with chronic hepatitis B are at increased risk of developing.</p> <p>6. <b>Ultrasound Imaging:</b> Regular ultrasounds of the liver can detect changes in liver texture, signs of cirrhosis, and any tumors.</p> <p>7. <b>Fibrosis Assessment:</b> This can be done through non-invasive methods like FibroScan (transient elastography) or through a liver biopsy to determine the extent of liver scarring or fibrosis.</p> <p>Regular visits to a hepatologist or a specialist in liver diseases are crucial. They can tailor these tests based on your specific condition, treatment response, and other individual factors. It's also important to maintain a healthy lifestyle, including a balanced diet, regular exercise, and avoiding alcohol, to support liver health.</p> |
| 32. I have chronic hepatitis B and it's controlled with medication; how often should I visit the hospital for follow-up? | <p>It's excellent that your chronic hepatitis B is well-managed with medication. Regular follow-up visits are important to monitor your liver function, the effectiveness of the treatment, and any potential side effects of the medication. Typically, patients with well-controlled chronic hepatitis B should see their healthcare provider every six to twelve months.</p>                                                                                                                                                                                                                                                                                                                                                                                                                                                                                                                                                                                                                                                                                                                                                                                                                                                                                                                                                                                                                                                                                                                                                                                                             |

|                                                                                            |                                                                                                                                                                                                                                                                                                                                                                                                                                                                                                                                                                                                                                                                                                                                                                                                                                                                                                                                                                                                                                                                                                                                                                                                                                                                                                                                                                                                                                                                                                                                                                                                                                                                     |
|--------------------------------------------------------------------------------------------|---------------------------------------------------------------------------------------------------------------------------------------------------------------------------------------------------------------------------------------------------------------------------------------------------------------------------------------------------------------------------------------------------------------------------------------------------------------------------------------------------------------------------------------------------------------------------------------------------------------------------------------------------------------------------------------------------------------------------------------------------------------------------------------------------------------------------------------------------------------------------------------------------------------------------------------------------------------------------------------------------------------------------------------------------------------------------------------------------------------------------------------------------------------------------------------------------------------------------------------------------------------------------------------------------------------------------------------------------------------------------------------------------------------------------------------------------------------------------------------------------------------------------------------------------------------------------------------------------------------------------------------------------------------------|
|                                                                                            | <p>However, the frequency can vary based on individual circumstances, such as the presence of other health issues, changes in symptoms, or specific concerns about the disease's progression. It's best to follow the specific recommendations of your healthcare provider who is familiar with your medical history and current condition.</p>                                                                                                                                                                                                                                                                                                                                                                                                                                                                                                                                                                                                                                                                                                                                                                                                                                                                                                                                                                                                                                                                                                                                                                                                                                                                                                                     |
| 33. What are the common antiviral drugs for chronic hepatitis B?                           | <p>For treating chronic hepatitis B, several antiviral medications are commonly used to help reduce the virus's replication and minimize liver damage. Here are some of the most frequently prescribed antiviral drugs for this condition:</p> <ol style="list-style-type: none"> <li>1. <b>Tenofovir disoproxil fumarate (TDF)</b> - This is one of the first-line treatments for chronic hepatitis B. It is highly effective in reducing the amount of virus in the blood and improving liver inflammation.</li> <li>2. <b>Entecavir</b> - Another first-line treatment, entecavir is favored for its potent antiviral activity and a low chance of developing drug resistance when used as the initial therapy.</li> <li>3. <b>Lamivudine</b> - Although it was once a first-line therapy, lamivudine is now less commonly used as initial treatment due to higher rates of resistance. However, it might still be prescribed in some cases.</li> <li>4. <b>Adefovir</b> - This drug is typically used as a second-line treatment because of its relatively lower efficacy and higher rates of resistance compared to tenofovir and entecavir.</li> <li>5. <b>Tenofovir alafenamide (TAF)</b> - A newer formulation of tenofovir that is more effective at lower doses with potentially fewer kidney and bone side effects compared to TDF.</li> </ol> <p>These medications are usually taken orally and can significantly help manage the disease by maintaining low viral levels and improving liver health. Regular monitoring and follow-up with a healthcare provider are essential to manage the condition effectively and adjust treatment as needed.</p> |
| 34. I have chronic hepatitis B and am using long-acting interferon treatment; what are the | <p>Long-acting interferon is a treatment option for chronic hepatitis B, designed to help control the virus and boost the immune system. However, like all medications, it can have side effects. Some of the common side effects of long-acting</p>                                                                                                                                                                                                                                                                                                                                                                                                                                                                                                                                                                                                                                                                                                                                                                                                                                                                                                                                                                                                                                                                                                                                                                                                                                                                                                                                                                                                                |

|                                                                                                                                       |                                                                                                                                                                                                                                                                                                                                                                                                                                                                                                                                                                                                                                                                                                                                                                                                                                                                                                                                                                                                                                                                                                                                                                                                                                                                                                                                                                                                                                                                                 |
|---------------------------------------------------------------------------------------------------------------------------------------|---------------------------------------------------------------------------------------------------------------------------------------------------------------------------------------------------------------------------------------------------------------------------------------------------------------------------------------------------------------------------------------------------------------------------------------------------------------------------------------------------------------------------------------------------------------------------------------------------------------------------------------------------------------------------------------------------------------------------------------------------------------------------------------------------------------------------------------------------------------------------------------------------------------------------------------------------------------------------------------------------------------------------------------------------------------------------------------------------------------------------------------------------------------------------------------------------------------------------------------------------------------------------------------------------------------------------------------------------------------------------------------------------------------------------------------------------------------------------------|
| <p>side effects of long-acting interferon?</p>                                                                                        | <p>interferon include:</p> <ol style="list-style-type: none"> <li>1. <b>Flu-like symptoms:</b> These are common and can include fever, chills, fatigue, muscle aches, and headaches. These symptoms often occur soon after treatment is initiated.</li> <li>2. <b>Mood changes:</b> Patients may experience mood swings, depression, or irritability. It's important to monitor mental health closely and discuss any changes with your healthcare provider.</li> <li>3. <b>Blood count changes:</b> Interferon can affect your blood cells, leading to low white blood cell counts (which can increase infection risk) or low red blood cell counts (which can cause anemia).</li> <li>4. <b>Thyroid problems:</b> The treatment can affect thyroid function, leading to hypothyroidism or hyperthyroidism, which may require additional treatment.</li> <li>5. <b>Fatigue:</b> Many people feel unusually tired while undergoing treatment with interferon.</li> <li>6. <b>Appetite loss:</b> You might experience a decrease in appetite, which can sometimes lead to weight loss.</li> <li>7. <b>Hair thinning:</b> Some patients report hair thinning or hair loss during treatment.</li> </ol> <p>It's crucial to discuss these potential side effects with your healthcare provider, as they can help manage them and adjust your treatment plan if necessary. Monitoring your health during treatment with regular visits to your healthcare provider is essential.</p> |
| <p>35. I have chronic hepatitis B and am using long-acting interferon treatment; what discomfort should I be aware of in my body?</p> | <p>As a chief physician advising you on long-acting interferon treatment for chronic hepatitis B, I would like you to be aware of several common and some potentially serious side effects associated with interferon therapy.</p>                                                                                                                                                                                                                                                                                                                                                                                                                                                                                                                                                                                                                                                                                                                                                                                                                                                                                                                                                                                                                                                                                                                                                                                                                                              |

|                                                                                                                                |                                                                                                                                                                                                                                                                                                                                                                                                                                                                                                                                                                                                                                                                                                                                                                                                                                                                                                                                                                                                                                                                                                                                                                                                                                                                                                                                                                                                                                                                                                                                                                                                                                                                                                                                                                                                                                                                                                                                                                                                                                                                                      |
|--------------------------------------------------------------------------------------------------------------------------------|--------------------------------------------------------------------------------------------------------------------------------------------------------------------------------------------------------------------------------------------------------------------------------------------------------------------------------------------------------------------------------------------------------------------------------------------------------------------------------------------------------------------------------------------------------------------------------------------------------------------------------------------------------------------------------------------------------------------------------------------------------------------------------------------------------------------------------------------------------------------------------------------------------------------------------------------------------------------------------------------------------------------------------------------------------------------------------------------------------------------------------------------------------------------------------------------------------------------------------------------------------------------------------------------------------------------------------------------------------------------------------------------------------------------------------------------------------------------------------------------------------------------------------------------------------------------------------------------------------------------------------------------------------------------------------------------------------------------------------------------------------------------------------------------------------------------------------------------------------------------------------------------------------------------------------------------------------------------------------------------------------------------------------------------------------------------------------------|
| <p>Under what circumstances should I seek immediate medical attention?</p>                                                     | <p><b>**Common Side Effects:**</b></p> <ol style="list-style-type: none"> <li>1. <b>**Flu-like symptoms:**</b> These include fever, chills, headache, muscle and joint aches, and fatigue. These symptoms are most intense in the first few hours or days after treatment and usually diminish over time.</li> <li>2. <b>**Mood changes:**</b> Some people experience irritability, anxiety, or depression. Monitoring your mental health is important.</li> <li>3. <b>**Gastrointestinal issues:**</b> Nausea, vomiting, and loss of appetite can occur.</li> <li>4. <b>**Blood cell changes:**</b> Interferon can affect your blood cells, leading to anemia, a decrease in white blood cells, or a reduction in platelets, which could increase your risk of infections or bleeding.</li> </ol> <p><b>**Serious Side Effects Requiring Immediate Attention:**</b></p> <ol style="list-style-type: none"> <li>1. <b>**Severe mood or mental changes:**</b> If you experience significant depression, suicidal thoughts, or severe anxiety, seek immediate medical help.</li> <li>2. <b>**Intense abdominal pain or persistent vomiting:**</b> These could indicate pancreatitis or other serious conditions.</li> <li>3. <b>**Symptoms of infection:**</b> Such as persistent fever, severe chills, or sore throat, which could indicate a drop in your white blood cells.</li> <li>4. <b>**Breathing difficulties or chest pain:**</b> These can be signs of a lung issue, like pneumonitis or pulmonary fibrosis.</li> <li>5. <b>**Severe skin rashes or allergic reactions:**</b> If you notice hives, swelling of the face, lips, tongue, or throat, or difficulty breathing, this could be an allergic reaction requiring urgent care.</li> </ol> <p>It's important to maintain regular follow-up appointments with your healthcare provider to monitor your response to the treatment and adjust as necessary. If you experience any of the serious side effects mentioned, you should contact your healthcare provider or seek emergency medical attention immediately.</p> |
| <p>36. I have chronic hepatitis B and am using long-acting interferon treatment; what indicators should I regularly check?</p> | <p>For managing chronic hepatitis B with long-acting interferon treatment, it's crucial to monitor several key indicators regularly to assess the effectiveness of the treatment and monitor for potential side effects. Here are the important tests and indicators you should check:</p>                                                                                                                                                                                                                                                                                                                                                                                                                                                                                                                                                                                                                                                                                                                                                                                                                                                                                                                                                                                                                                                                                                                                                                                                                                                                                                                                                                                                                                                                                                                                                                                                                                                                                                                                                                                           |

|  |                                                                                                                                                                                                                                                                                                                                                                                                                                                                                                                                                                                                                                                                                                                                                                                                                                                                                                                                                                                                                                                                                                                                                                                                                                                                                                                                                                                                                                                                                                                                                                                                                                                                                                                                                                                                                                                                                                                                                                                                                                                                                               |
|--|-----------------------------------------------------------------------------------------------------------------------------------------------------------------------------------------------------------------------------------------------------------------------------------------------------------------------------------------------------------------------------------------------------------------------------------------------------------------------------------------------------------------------------------------------------------------------------------------------------------------------------------------------------------------------------------------------------------------------------------------------------------------------------------------------------------------------------------------------------------------------------------------------------------------------------------------------------------------------------------------------------------------------------------------------------------------------------------------------------------------------------------------------------------------------------------------------------------------------------------------------------------------------------------------------------------------------------------------------------------------------------------------------------------------------------------------------------------------------------------------------------------------------------------------------------------------------------------------------------------------------------------------------------------------------------------------------------------------------------------------------------------------------------------------------------------------------------------------------------------------------------------------------------------------------------------------------------------------------------------------------------------------------------------------------------------------------------------------------|
|  | <p>1. <b>**Viral Load (HBV DNA)**</b>: This test measures the amount of hepatitis B virus in your blood. It helps determine how actively the virus is replicating. Regular monitoring can assess how well the interferon treatment is controlling the virus.</p> <p>2. <b>**Liver Function Tests (LFTs)**</b>: These tests measure the levels of liver enzymes (such as ALT and AST) and other substances in the blood. Elevated levels can indicate liver damage. LFTs help monitor the health of your liver and detect any treatment-related toxicity.</p> <p>3. <b>**Hepatitis B Surface Antigen (HBsAg)**</b> and <b>**E-Antigen (HBeAg)**</b>: These markers help evaluate the state of infection and the likelihood of response to therapy. A decline or loss of these antigens can indicate a positive response to treatment.</p> <p>4. <b>**Complete Blood Count (CBC)**</b>: Interferon can affect blood cell counts, leading to conditions such as anemia, neutropenia, or thrombocytopenia. Regular CBCs are important to detect these potential side effects early.</p> <p>5. <b>**Thyroid Function Tests**</b>: Interferon can affect thyroid function, so it's important to monitor thyroid-stimulating hormone (TSH) and thyroxine levels regularly.</p> <p>6. <b>**Kidney Function Tests**</b>: Renal function should also be monitored, particularly if there's pre-existing kidney disease or if the treatment regimen might impact renal function.</p> <p>7. <b>**Alpha-fetoprotein (AFP)**</b>: Although not routinely required, this test can be helpful in monitoring individuals at risk for hepatocellular carcinoma, especially in those with cirrhosis or a long-standing infection.</p> <p>These tests are typically conducted at the start of treatment and at regular intervals during therapy to ensure that the treatment is effective and to adjust the therapy as needed based on your response and any side effects. Regular visits to your healthcare provider are also essential to discuss your progress and any symptoms you might experience. It's</p> |
|--|-----------------------------------------------------------------------------------------------------------------------------------------------------------------------------------------------------------------------------------------------------------------------------------------------------------------------------------------------------------------------------------------------------------------------------------------------------------------------------------------------------------------------------------------------------------------------------------------------------------------------------------------------------------------------------------------------------------------------------------------------------------------------------------------------------------------------------------------------------------------------------------------------------------------------------------------------------------------------------------------------------------------------------------------------------------------------------------------------------------------------------------------------------------------------------------------------------------------------------------------------------------------------------------------------------------------------------------------------------------------------------------------------------------------------------------------------------------------------------------------------------------------------------------------------------------------------------------------------------------------------------------------------------------------------------------------------------------------------------------------------------------------------------------------------------------------------------------------------------------------------------------------------------------------------------------------------------------------------------------------------------------------------------------------------------------------------------------------------|

|                                                                                      |                                                                                                                                                                                                                                                                                                                                                                                                                                                                                                                                                                                                                                                                                                                                                                                                                                                                                                                                                                                                                                                                                                                                                                                                                                                                                                                                                                                                                                                                                                                                                                                                                |
|--------------------------------------------------------------------------------------|----------------------------------------------------------------------------------------------------------------------------------------------------------------------------------------------------------------------------------------------------------------------------------------------------------------------------------------------------------------------------------------------------------------------------------------------------------------------------------------------------------------------------------------------------------------------------------------------------------------------------------------------------------------------------------------------------------------------------------------------------------------------------------------------------------------------------------------------------------------------------------------------------------------------------------------------------------------------------------------------------------------------------------------------------------------------------------------------------------------------------------------------------------------------------------------------------------------------------------------------------------------------------------------------------------------------------------------------------------------------------------------------------------------------------------------------------------------------------------------------------------------------------------------------------------------------------------------------------------------|
|                                                                                      | important to personalize the monitoring schedule based on individual health status and response to therapy.                                                                                                                                                                                                                                                                                                                                                                                                                                                                                                                                                                                                                                                                                                                                                                                                                                                                                                                                                                                                                                                                                                                                                                                                                                                                                                                                                                                                                                                                                                    |
| 37. When taking anti-hepatitis B medication, what dietary precautions should I take? | <p>When taking medication for hepatitis B, it's important to follow a balanced and healthy diet that supports liver health. Here are some dietary precautions and tips:</p> <ol style="list-style-type: none"> <li>1. <b>Limit Alcohol and Drugs:</b> Avoid alcohol as it can increase liver damage. Also, be cautious with medications, including over-the-counter ones, as they can strain your liver.</li> <li>2. <b>Reduce Fat Intake:</b> Lower the amount of saturated fats and trans fats in your diet. This means limiting fried foods, butter, and fatty cuts of meat.</li> <li>3. <b>Eat Lean Proteins:</b> Include sources of lean protein, such as fish, poultry, tofu, and legumes. These are easier on your liver than red meats.</li> <li>4. <b>Increase Fiber:</b> Eat plenty of fruits, vegetables, and whole grains to maintain digestive health.</li> <li>5. <b>Stay Hydrated:</b> Drink plenty of water to help your liver flush out toxins.</li> <li>6. <b>Limit Salt and Sugar:</b> High amounts of salt can lead to fluid accumulation and swelling in the liver. Excessive sugar can contribute to fat buildup in the liver.</li> <li>7. <b>Supplement Wisely:</b> Be cautious with herbal supplements and vitamins, as some can harm your liver. Always consult your healthcare provider before starting any new supplements.</li> <li>8. <b>Monitor Iron Intake:</b> Some individuals with chronic liver disease accumulate iron in the liver. If this applies to you, you might need to moderate your intake of iron-rich foods, such as red meat and fortified cereals.</li> </ol> |

|                                                                                                                                                  |                                                                                                                                                                                                                                                                                                                                                                                                                                                                                                                                                                                                                                                                                                                                                                                                                                                                                                                                                                                                                                                                                                                                                                                                                                                                                                                                                                                                                                                                                                  |
|--------------------------------------------------------------------------------------------------------------------------------------------------|--------------------------------------------------------------------------------------------------------------------------------------------------------------------------------------------------------------------------------------------------------------------------------------------------------------------------------------------------------------------------------------------------------------------------------------------------------------------------------------------------------------------------------------------------------------------------------------------------------------------------------------------------------------------------------------------------------------------------------------------------------------------------------------------------------------------------------------------------------------------------------------------------------------------------------------------------------------------------------------------------------------------------------------------------------------------------------------------------------------------------------------------------------------------------------------------------------------------------------------------------------------------------------------------------------------------------------------------------------------------------------------------------------------------------------------------------------------------------------------------------|
|                                                                                                                                                  | <p>It's also advisable to discuss your diet with your healthcare provider or a dietitian who can give personalized advice based on your health status, liver function, and treatment plan.</p>                                                                                                                                                                                                                                                                                                                                                                                                                                                                                                                                                                                                                                                                                                                                                                                                                                                                                                                                                                                                                                                                                                                                                                                                                                                                                                   |
| <p>38. I have just been diagnosed with hepatitis B; under what circumstances should I consider treatment?</p>                                    | <p>Hepatitis B management can vary based on several factors. Typically, treatment is considered if you exhibit certain clinical or laboratory indicators of active infection that could lead to liver damage. Here are some key considerations:</p> <ol style="list-style-type: none"> <li>1. <b>**Viral Load**</b>: High levels of HBV DNA in your blood suggest active viral replication.</li> <li>2. <b>**Liver Enzyme Levels**</b>: Elevated ALT and AST levels indicate liver inflammation or damage.</li> <li>3. <b>**Liver Function**</b>: Assessments might include imaging studies like ultrasound and possibly a liver biopsy to evaluate the extent of liver damage.</li> <li>4. <b>**Age and Overall Health**</b>: Younger patients with strong immune systems may not need immediate treatment, as they might clear the infection naturally. Treatment urgency increases with age and in the presence of other health conditions like cirrhosis or co-infections (e.g., HIV or hepatitis C).</li> <li>5. <b>**Family History and Cancer Risk**</b>: A family history of liver cancer or cirrhosis can affect the decision to treat.</li> </ol> <p>Treatment aims to reduce the risk of chronic disease progression, cirrhosis, and liver cancer. Decisions about starting treatment should be made in consultation with a healthcare provider specializing in liver diseases. Regular monitoring and lifestyle modifications are also critical aspects of managing hepatitis B.</p> |
| <p>39. I am a patient with chronic hepatitis B undergoing initial treatment; how often should I have check-ups during the treatment process?</p> | <p>For patients with chronic hepatitis B undergoing initial treatment, the frequency of check-ups can vary depending on several factors, including the specific antiviral therapy used, the baseline liver function, and the presence of any other medical conditions. Typically, here's a general guideline for monitoring:</p> <ol style="list-style-type: none"> <li>1. <b>**Baseline Assessment**</b>: Before starting treatment, a comprehensive evaluation including liver function tests, HBV DNA levels, and possibly a liver ultrasound, should be performed.</li> <li>2. <b>**Early Treatment Phase**</b>: During the first few months of therapy, monitoring might be more frequent to assess the effectiveness of the medication and any side effects. This could involve visits every 1-3 months where liver function</li> </ol>                                                                                                                                                                                                                                                                                                                                                                                                                                                                                                                                                                                                                                                    |

|                                                                                                                                     |                                                                                                                                                                                                                                                                                                                                                                                                                                                                                                                                                                                                                                                                                                                                                                                                                                                                                                                                                                                                                                                                                                                                                                                                                                                                     |
|-------------------------------------------------------------------------------------------------------------------------------------|---------------------------------------------------------------------------------------------------------------------------------------------------------------------------------------------------------------------------------------------------------------------------------------------------------------------------------------------------------------------------------------------------------------------------------------------------------------------------------------------------------------------------------------------------------------------------------------------------------------------------------------------------------------------------------------------------------------------------------------------------------------------------------------------------------------------------------------------------------------------------------------------------------------------------------------------------------------------------------------------------------------------------------------------------------------------------------------------------------------------------------------------------------------------------------------------------------------------------------------------------------------------|
|                                                                                                                                     | <p>tests and HBV DNA levels are checked.</p> <p>3. <b>**Stable Treatment Phase**</b>: Once your response to treatment stabilizes, the intervals between check-ups may be extended. This could mean visits every 3-6 months, with routine assessments including liver function tests and HBV DNA levels.</p> <p>4. <b>**Long-term Monitoring**</b>: If the virus remains under control and liver function is stable, check-ups may be extended further to every 6-12 months. However, the exact frequency can depend on factors such as age, the severity of liver disease at baseline, and whether cirrhosis is present.</p> <p>It's essential to closely follow the specific plan outlined by your healthcare provider, as they will tailor it based on your individual health needs and response to treatment.</p>                                                                                                                                                                                                                                                                                                                                                                                                                                                |
| 40. I have chronic hepatitis B and am currently pregnant; what should I be aware of? How can I prevent transmission to the newborn? | <p>Managing chronic hepatitis B during pregnancy requires careful monitoring and coordination with your healthcare provider to ensure both your health and the health of your unborn child. Here are some key aspects to consider and preventive measures to reduce the risk of transmitting the virus to your newborn:</p> <p>1. <b>**Regular Monitoring**</b>: Throughout your pregnancy, regular monitoring of your liver function and viral load is important. This will help your healthcare team to assess the activity of the virus and the health of your liver.</p> <p>2. <b>**Antiviral Therapy**</b>: Depending on your viral load and liver health, your doctor might recommend antiviral therapy during pregnancy to reduce the risk of transmitting the virus to your baby. Medications like tenofovir are commonly used because they are safe and effective during pregnancy.</p> <p>3. <b>**Vaccination and Immunoglobulin for the Newborn**</b>: To prevent hepatitis B transmission, it's crucial to administer hepatitis B vaccine and hepatitis B immune globulin (HBIG) to your newborn within 12 hours of birth. The newborn should complete the hepatitis B vaccine series according to the recommended schedule for maximum protection.</p> |



|                                                   |                                                                                                                                                                                                                                                                                                                                                                                                                                                                                                                                                                                                                                                                                                                                                                                                                                                                                                                                                                                                                                                                                                                                                                                                      |
|---------------------------------------------------|------------------------------------------------------------------------------------------------------------------------------------------------------------------------------------------------------------------------------------------------------------------------------------------------------------------------------------------------------------------------------------------------------------------------------------------------------------------------------------------------------------------------------------------------------------------------------------------------------------------------------------------------------------------------------------------------------------------------------------------------------------------------------------------------------------------------------------------------------------------------------------------------------------------------------------------------------------------------------------------------------------------------------------------------------------------------------------------------------------------------------------------------------------------------------------------------------|
|                                                   | <p>4. <b>**Breastfeeding:**</b> Mothers with chronic hepatitis B can breastfeed their babies, as the hepatitis B virus is not transmitted through breast milk. However, care should be taken to avoid nipple bleeding.</p> <p>5. <b>**Regular Pediatric Follow-up:**</b> After birth, the baby will require regular monitoring to ensure that the vaccination has been effective and to check for any signs of infection.</p> <p>6. <b>**Discuss Delivery Options:**</b> It's generally safe to have a normal vaginal delivery if you have chronic hepatitis B, but always discuss your specific case with your healthcare provider.</p> <p>By closely working with your healthcare team, you can manage your hepatitis B effectively during pregnancy and significantly reduce the risk of passing the virus to your newborn.</p>                                                                                                                                                                                                                                                                                                                                                                   |
| 41. I have hepatitis C; how should it be treated? | <p>As your physician, I recommend a comprehensive approach to treating hepatitis C, which primarily involves antiviral medications. The standard treatment includes a class of drugs called direct-acting antivirals (DAAs), which are highly effective in clearing the virus from the bloodstream. The specific regimen and duration of treatment depend on several factors including the genotype of the hepatitis C virus, the extent of liver damage, previous treatments, and any coexisting medical conditions.</p> <p>Most treatment courses can last from 8 to 12 weeks and have a success rate of over 90% in curing the infection. It's also important to monitor for side effects and assess liver function regularly during treatment. Additionally, lifestyle modifications such as avoiding alcohol, maintaining a healthy weight, and managing coexisting conditions like diabetes or HIV are crucial.</p> <p>Follow-up care is essential to ensure the virus has been completely cleared and to manage any long-term effects on liver health. Regular visits with a healthcare provider, including liver function tests and possibly imaging studies, are typically recommended.</p> |

|                                                                                   |                                                                                                                                                                                                                                                                                                                                                                                                                                                                                                                                                                                                                                                                                                                                                                                                                                                                                                                                                                                                                                                                                                                                                                                                                                                                                                                                                                                                                                                          |
|-----------------------------------------------------------------------------------|----------------------------------------------------------------------------------------------------------------------------------------------------------------------------------------------------------------------------------------------------------------------------------------------------------------------------------------------------------------------------------------------------------------------------------------------------------------------------------------------------------------------------------------------------------------------------------------------------------------------------------------------------------------------------------------------------------------------------------------------------------------------------------------------------------------------------------------------------------------------------------------------------------------------------------------------------------------------------------------------------------------------------------------------------------------------------------------------------------------------------------------------------------------------------------------------------------------------------------------------------------------------------------------------------------------------------------------------------------------------------------------------------------------------------------------------------------|
|                                                                                   | <p>It's best to discuss with a healthcare provider to tailor the treatment plan according to your specific needs and health status.</p>                                                                                                                                                                                                                                                                                                                                                                                                                                                                                                                                                                                                                                                                                                                                                                                                                                                                                                                                                                                                                                                                                                                                                                                                                                                                                                                  |
| <p>42. What are the common medications for treating hepatitis C?</p>              | <p>The treatment of hepatitis C has advanced significantly over the years, and currently, the most common and effective treatments are antiviral medications known as direct-acting antivirals (DAAs). These medications are highly effective and can cure the infection in most people within 8 to 12 weeks. Here are some commonly used DAAs for hepatitis C:</p> <ol style="list-style-type: none"> <li>1. <b>Ledipasvir and Sofosbuvir (Harvoni)</b>: This combination is often used for treating genotypes 1, 4, 5, and 6 of hepatitis C virus (HCV).</li> <li>2. <b>Sofosbuvir and Velpatasvir (Epclusa)</b>: Effective against all genotypes of HCV, making it a versatile option for many patients.</li> <li>3. <b>Elbasvir and Grazoprevir (Zepatier)</b>: Primarily used for genotypes 1 and 4 of HCV.</li> <li>4. <b>Glecaprevir and Pibrentasvir (Mavyret)</b>: This is another option effective against all genotypes of HCV, and it has a shorter treatment duration for some patients.</li> </ol> <p>These medications target different steps in the hepatitis C virus life cycle, preventing the virus from multiplying and reducing the viral load to undetectable levels, which is considered a cure. Treatment regimens can vary based on the specific genotype of HCV, the presence of existing liver damage, and other individual health factors. Your healthcare provider will choose the best regimen based on these factors.</p> |
| <p>43. What tests should I undergo before starting treatment for hepatitis C?</p> | <p>Before beginning treatment for hepatitis C, several tests are generally recommended to assess your liver health and the specifics of your infection. These tests help in tailoring the treatment plan to be most effective for you. Here's a typical list:</p>                                                                                                                                                                                                                                                                                                                                                                                                                                                                                                                                                                                                                                                                                                                                                                                                                                                                                                                                                                                                                                                                                                                                                                                        |

|                                                                                                                                    |                                                                                                                                                                                                                                                                                                                                                                                                                                                                                                                                                                                                                                                                                                                                                                                                                                                                                                                                                                                                                                                                                                                                                                                                                                                                                                                                                                                                           |
|------------------------------------------------------------------------------------------------------------------------------------|-----------------------------------------------------------------------------------------------------------------------------------------------------------------------------------------------------------------------------------------------------------------------------------------------------------------------------------------------------------------------------------------------------------------------------------------------------------------------------------------------------------------------------------------------------------------------------------------------------------------------------------------------------------------------------------------------------------------------------------------------------------------------------------------------------------------------------------------------------------------------------------------------------------------------------------------------------------------------------------------------------------------------------------------------------------------------------------------------------------------------------------------------------------------------------------------------------------------------------------------------------------------------------------------------------------------------------------------------------------------------------------------------------------|
|                                                                                                                                    | <p>1. <b>Hepatitis C Virus (HCV) RNA Test:</b> This test confirms the presence of the hepatitis C virus in your blood and measures the amount of virus (viral load).</p> <p>2. <b>HCV Genotype Test:</b> There are several different genotypes of the hepatitis C virus, and identifying which one you have can help determine the most effective treatment.</p> <p>3. <b>Liver Function Tests:</b> These tests assess how well your liver is working and include measurements of enzymes and proteins in your blood.</p> <p>4. <b>Liver Stiffness Measurement or FibroScan:</b> This test uses ultrasound waves to determine the degree of liver fibrosis or scarring.</p> <p>5. <b>Liver Biopsy:</b> In some cases, a biopsy might be necessary to directly assess the extent of liver damage.</p> <p>6. <b>Complete Blood Count and Comprehensive Metabolic Panel:</b> These tests provide information on your overall health and baseline function of other organs.</p> <p>7. <b>Tests for Other Infections:</b> Tests for HIV, hepatitis B, and other infections are important, as co-infections can influence the choice of treatment and prognosis.</p> <p>These tests will provide a comprehensive overview of your health status and guide the choice of antiviral therapy. Each patient's situation is unique, so additional tests might be recommended based on individual health factors.</p> |
| 44. I have hepatitis C and high blood pressure; which blood pressure medications should not be taken with hepatitis C medications? | <p>Managing both hepatitis C and high blood pressure requires careful selection of medications to avoid potential interactions. The choice of blood pressure medication might be influenced by the specific hepatitis C treatment you're on. Here are some general considerations:</p>                                                                                                                                                                                                                                                                                                                                                                                                                                                                                                                                                                                                                                                                                                                                                                                                                                                                                                                                                                                                                                                                                                                    |

|                                                                                                                   |                                                                                                                                                                                                                                                                                                                                                                                                                                                                                                                                                                                                                                                                                                                                                                                                                                                                                                                                                                                                                                                                                                                                                                                                                                                                                                                                                                                                                                                                 |
|-------------------------------------------------------------------------------------------------------------------|-----------------------------------------------------------------------------------------------------------------------------------------------------------------------------------------------------------------------------------------------------------------------------------------------------------------------------------------------------------------------------------------------------------------------------------------------------------------------------------------------------------------------------------------------------------------------------------------------------------------------------------------------------------------------------------------------------------------------------------------------------------------------------------------------------------------------------------------------------------------------------------------------------------------------------------------------------------------------------------------------------------------------------------------------------------------------------------------------------------------------------------------------------------------------------------------------------------------------------------------------------------------------------------------------------------------------------------------------------------------------------------------------------------------------------------------------------------------|
|                                                                                                                   | <p>1. <b>**ACE Inhibitors and ARBs**</b>: Commonly prescribed for high blood pressure, medications like lisinopril or losartan are generally safe. However, it's crucial to monitor kidney function, as hepatitis C can impact the kidneys.</p> <p>2. <b>**Beta Blockers**</b>: These can be used safely, but it's important to monitor for signs of liver decompensation, particularly in patients with advanced liver disease.</p> <p>3. <b>**Calcium Channel Blockers**</b>: These are often used and are generally safe but should be monitored for any signs of worsening liver function.</p> <p>4. <b>**Diuretics**</b>: Care should be taken with these, especially in patients with advanced liver disease, as they can alter electrolyte levels and kidney function.</p> <p>5. <b>**Interactions with Hepatitis C Medications**</b>: Some hepatitis C medications, especially those containing protease inhibitors, can interact with other drugs. For example, medications like ritonavir can increase the levels of certain blood pressure medications, leading to an increased risk of side effects.</p> <p>It's essential to coordinate with your healthcare provider, who can consider the specific details of your hepatitis C treatment and your overall health profile to choose the safest and most effective blood pressure medication for you. Regular monitoring and adjustments may be needed based on how your treatment progresses.</p> |
| 45. I have hepatitis C and diabetes; which diabetic medications should not be taken with hepatitis C medications? | <p>When managing diabetes in a patient with hepatitis C, it's crucial to carefully choose medications to avoid potential interactions with hepatitis C treatments. Hepatitis C treatments have advanced significantly, with direct-acting antivirals (DAAs) being the primary regimen. These DAAs have fewer interactions compared to older treatments, but some considerations remain.</p> <p>Here are some key points to consider:</p>                                                                                                                                                                                                                                                                                                                                                                                                                                                                                                                                                                                                                                                                                                                                                                                                                                                                                                                                                                                                                        |

|                                                                                                                                                    |                                                                                                                                                                                                                                                                                                                                                                                                                                                                                                                                                                                                                                                                                                                                                                                                                                                                                                                                                                                                                                                                                                                                                                                                                                                                                                                                                                                                                                                        |
|----------------------------------------------------------------------------------------------------------------------------------------------------|--------------------------------------------------------------------------------------------------------------------------------------------------------------------------------------------------------------------------------------------------------------------------------------------------------------------------------------------------------------------------------------------------------------------------------------------------------------------------------------------------------------------------------------------------------------------------------------------------------------------------------------------------------------------------------------------------------------------------------------------------------------------------------------------------------------------------------------------------------------------------------------------------------------------------------------------------------------------------------------------------------------------------------------------------------------------------------------------------------------------------------------------------------------------------------------------------------------------------------------------------------------------------------------------------------------------------------------------------------------------------------------------------------------------------------------------------------|
|                                                                                                                                                    | <ol style="list-style-type: none"> <li>1. <b>Metformin</b> is generally safe to use in patients with hepatitis C unless there is significant liver impairment, as it doesn't have known interactions with DAAs.</li> <li>2. <b>Sulfonylureas</b> (like glipizide and glyburide) should be used cautiously as they can cause hypoglycemia, especially if liver function is compromised.</li> <li>3. <b>Pioglitazone</b> and other thiazolidinediones should be used with caution because they can exacerbate liver disease in some cases.</li> </ol> <p>It's also important to avoid certain combinations:</p> <ul style="list-style-type: none"> <li>- <b>Statins</b> often used in diabetic patients for cardiovascular protection, can interact with some DAAs, particularly protease inhibitors. The specific choice of statin needs careful consideration.</li> <li>- <b>Exenatide</b> and other GLP-1 agonists do not directly interact with DAAs, but because they affect liver enzymes, their use should be monitored closely.</li> </ul> <p>Each patient's case is unique, and treatment should be personalized. I recommend discussing with your healthcare provider or a hepatologist who can tailor the treatment according to both your diabetes and hepatitis C, considering the specific DAA regimen you are on. They might need to adjust doses or switch medications based on your liver function tests and overall health status.</p> |
| <p>46. I have hepatitis C and coronary heart disease; which cholesterol-lowering medications should not be taken with hepatitis C medications?</p> | <p>Managing both hepatitis C and coronary heart disease involves careful consideration, especially when it comes to medications, as there can be significant interactions. The treatment for hepatitis C has evolved significantly, and many patients now use direct-acting antivirals (DAAs). These medications can interact with cholesterol-lowering drugs, particularly statins, which are commonly prescribed for coronary heart disease.</p> <p>Here are some specific points to consider:</p> <ol style="list-style-type: none"> <li>1. <b>Statins</b>: Certain statins are metabolized by liver enzymes that can also be affected by DAAs. For example, lovastatin and simvastatin are generally advised against with some hepatitis C treatments due to increased risk of</li> </ol>                                                                                                                                                                                                                                                                                                                                                                                                                                                                                                                                                                                                                                                          |

|                                                                                                                                                              |                                                                                                                                                                                                                                                                                                                                                                                                                                                                                                                                                                                                                                                                                                                                                                                                                                                                                                                                                                                                                                                                                                                                                                                                                                              |
|--------------------------------------------------------------------------------------------------------------------------------------------------------------|----------------------------------------------------------------------------------------------------------------------------------------------------------------------------------------------------------------------------------------------------------------------------------------------------------------------------------------------------------------------------------------------------------------------------------------------------------------------------------------------------------------------------------------------------------------------------------------------------------------------------------------------------------------------------------------------------------------------------------------------------------------------------------------------------------------------------------------------------------------------------------------------------------------------------------------------------------------------------------------------------------------------------------------------------------------------------------------------------------------------------------------------------------------------------------------------------------------------------------------------|
|                                                                                                                                                              | <p>severe side effects like muscle injury. Atorvastatin can be used but often requires dosage adjustments.</p> <p>2. <b>**Interaction with DAAs**</b>: Some DAAs can increase the levels of statins in the blood, potentially leading to side effects. It's important to choose a statin that has a lower risk of interaction. Pravastatin, fluvastatin, and rosuvastatin are often considered safer alternatives, but still require monitoring.</p> <p>3. <b>**Non-statin cholesterol medications**</b>: Depending on your specific case, alternatives to statins, like ezetimibe or PCSK9 inhibitors (e.g., alirocumab and evolocumab), might be options. These generally have fewer interactions with DAAs.</p> <p>4. <b>**Regular Monitoring**</b>: Whichever medication is chosen, regular monitoring of liver function and cholesterol levels is crucial to adjust dosages and ensure no adverse interactions are occurring.</p> <p>It's essential to coordinate care between your hepatologist and cardiologist to ensure that all aspects of your hepatitis C and coronary heart disease are managed effectively and safely. Always consult with your healthcare providers before making any changes to your medication regimen.</p> |
| 47. After standardized treatment for hepatitis C, if the hepatitis C RNA test is negative but hepatitis C antibodies are still positive, is there a problem? | <p>In the context of hepatitis C treatment, a negative hepatitis C RNA test following treatment is a good indicator that the virus is no longer actively replicating in your body, suggesting that the treatment has been successful. This is often referred to as a sustained virologic response (SVR), and it is essentially what we aim for with treatment.</p> <p>Hepatitis C antibodies, on the other hand, can remain positive even after successful treatment. These antibodies indicate past exposure to the virus, not current infection. They can persist for life and don't necessarily mean that the virus is still present. Therefore, having positive hepatitis C antibodies while the RNA test is negative typically isn't a cause for concern. It simply shows that your immune system was exposed to the virus at some point in the past.</p> <p>It's always good practice to follow up with your healthcare provider to monitor your health status and ensure no</p>                                                                                                                                                                                                                                                       |

|                                                                                                                                                                                          |                                                                                                                                                                                                                                                                                                                                                                                                                                                                                                                                                                                                                                                                                                                                                                                                                                                                                                                                                                                             |
|------------------------------------------------------------------------------------------------------------------------------------------------------------------------------------------|---------------------------------------------------------------------------------------------------------------------------------------------------------------------------------------------------------------------------------------------------------------------------------------------------------------------------------------------------------------------------------------------------------------------------------------------------------------------------------------------------------------------------------------------------------------------------------------------------------------------------------------------------------------------------------------------------------------------------------------------------------------------------------------------------------------------------------------------------------------------------------------------------------------------------------------------------------------------------------------------|
|                                                                                                                                                                                          | re-infection or other complications arise.                                                                                                                                                                                                                                                                                                                                                                                                                                                                                                                                                                                                                                                                                                                                                                                                                                                                                                                                                  |
| 48. I have hepatitis C; after one month of antiviral treatment, the hepatitis C RNA test is negative; do I need to continue treatment for 3 to 6 months according to the treatment plan? | <p>It's encouraging to hear that your hepatitis C RNA test is negative after one month of treatment! However, it's essential to continue following your prescribed treatment plan, which typically lasts between 8 to 12 weeks, or sometimes longer, depending on the specific antiviral regimen and your individual health circumstances.</p> <p>The reason to continue therapy even after a negative RNA test is to ensure that the virus is completely eradicated from your body. Stopping treatment early can lead to a relapse, where the virus returns, potentially in a form that is harder to treat. Your healthcare provider will guide you on the exact duration of treatment you need based on factors such as the genotype of the hepatitis C virus, your liver health, and whether you've been treated for hepatitis C before.</p> <p>Make sure to keep all follow-up appointments and adhere to the treatment regimen as prescribed to achieve the best possible outcome.</p> |
| 49. If I have been treated for hepatitis C according to the treatment plan and recovered, can I get hepatitis C again?                                                                   | Yes, if you have been successfully treated for hepatitis C and recovered, you can still get hepatitis C again. The treatment for hepatitis C can clear the virus from your body, but it doesn't provide immunity, which means you can be infected again if you are exposed to the virus. It's important to continue to take precautions to avoid exposure to hepatitis C, such as not sharing needles, practicing safe sex, and ensuring that any medical or tattoo equipment is sterile and used properly.                                                                                                                                                                                                                                                                                                                                                                                                                                                                                 |
| 50. If I have been treated for hepatitis C according to the treatment plan and recovered, do I need further check-ups? How often should check-ups be done?                               | <p>Congratulations on completing your treatment for hepatitis C and your recovery. It's essential to continue monitoring your health even after the treatment ends. Here's a general follow-up plan, but remember, the specifics can vary based on individual health status and should be discussed with your healthcare provider.</p> <ol style="list-style-type: none"> <li>1. <b>**Follow-up Testing**</b>: Typically, a test called a sustained virological response (SVR) is performed about 12 weeks after you finish your treatment. If this test shows no detectable virus in your blood, you are considered cured of hepatitis C. However, it's crucial to continue monitoring because a small number of people may relapse.</li> <li>2. <b>**Regular Check-ups**</b>: If you have achieved SVR, the frequency of further check-ups largely depends on the degree</li> </ol>                                                                                                       |

|                                                                      |                                                                                                                                                                                                                                                                                                                                                                                                                                                                                                                                                                                                                                                                                                                                                                                                                                                                                                                                                                                                                                                                                                                                                               |
|----------------------------------------------------------------------|---------------------------------------------------------------------------------------------------------------------------------------------------------------------------------------------------------------------------------------------------------------------------------------------------------------------------------------------------------------------------------------------------------------------------------------------------------------------------------------------------------------------------------------------------------------------------------------------------------------------------------------------------------------------------------------------------------------------------------------------------------------------------------------------------------------------------------------------------------------------------------------------------------------------------------------------------------------------------------------------------------------------------------------------------------------------------------------------------------------------------------------------------------------|
|                                                                      | <p>of liver damage (if any) prior to treatment. Those with mild or no fibrosis may not need extensive monitoring. However, if there was significant fibrosis or cirrhosis, regular check-ups every 6 to 12 months might be recommended to monitor liver function and screen for liver cancer.</p> <p>3. <b>**Lifestyle and Prevention**</b>: Continue to maintain a healthy lifestyle to support your liver health. This includes avoiding alcohol, managing weight, and controlling other factors such as diabetes or high cholesterol. Also, since hepatitis C can be contracted again, it's important to avoid risk factors for new hepatitis C infections.</p> <p>4. <b>**Vaccinations**</b>: If you haven't been vaccinated against hepatitis A and B, you should discuss these vaccines with your healthcare provider, as these infections can also harm the liver.</p> <p>Each patient's situation is unique, so these guidelines should be adjusted by your healthcare provider based on your specific condition and overall health. Regular follow-up visits are essential to ensure that any potential problems are detected and managed early.</p> |
| 51. If diagnosed with chronic hepatitis E, how should it be treated? | <p>Chronic hepatitis E is relatively rare but can occur, especially in individuals with compromised immune systems, such as those with a solid organ transplant, HIV, or on immunosuppressive therapy. The approach to treating chronic hepatitis E includes:</p> <p>1. <b>**Reduction or modification of immunosuppressive therapy**</b>: This is often considered first, especially if the patient is on immunosuppressive medication. Adjusting these medications can sometimes allow the immune system to clear the virus naturally.</p> <p>2. <b>**Antiviral therapy**</b>: Ribavirin has been used effectively for the treatment of chronic hepatitis E. A typical course might last from 3 to 6 months, depending on the patient's virological response. It's important to monitor for side effects and effectiveness through regular follow-ups.</p>                                                                                                                                                                                                                                                                                                  |



|                                                                       |                                                                                                                                                                                                                                                                                                                                                                                                                                                                                                                                                                                                                                                                                                                                                                                                                                                                                                                                                                            |
|-----------------------------------------------------------------------|----------------------------------------------------------------------------------------------------------------------------------------------------------------------------------------------------------------------------------------------------------------------------------------------------------------------------------------------------------------------------------------------------------------------------------------------------------------------------------------------------------------------------------------------------------------------------------------------------------------------------------------------------------------------------------------------------------------------------------------------------------------------------------------------------------------------------------------------------------------------------------------------------------------------------------------------------------------------------|
|                                                                       | <p>3. <b>**Monitoring**</b>: Regular monitoring of liver function tests, viral load, and general health status is crucial to assess the progression of the disease and the effectiveness of the treatment.</p> <p>4. <b>**Supportive care**</b>: Managing symptoms and maintaining adequate nutritional support are important, especially in cases where chronic hepatitis E has led to significant liver dysfunction.</p> <p>5. <b>**Consultation with a specialist**</b>: Managing chronic hepatitis E often requires coordinated care from a multidisciplinary team including hepatologists, infectious disease specialists, and other healthcare professionals.</p> <p>Each case of chronic hepatitis E may require a tailored approach based on the individual's overall health, liver function, and other medical conditions.</p>                                                                                                                                    |
| 52. If a family member has hepatitis E, how should others prevent it? | <p>In managing hepatitis E prevention when there's a case within a family, you should consider the following key measures:</p> <p>1. <b>**Maintain High Standards of Hygiene**</b>: Frequent handwashing with soap and water is crucial, especially after using the toilet and before preparing or eating food.</p> <p>2. <b>**Ensure Safe Drinking Water**</b>: Hepatitis E is often spread through contaminated water. Ensure your drinking water is clean and safe. Boiling water can be an effective method to kill any virus present.</p> <p>3. <b>**Cook Food Thoroughly**</b>: Hepatitis E can also be transmitted through contaminated food. Ensure that all food, particularly meat and shellfish, is cooked thoroughly to proper temperatures to kill any viruses.</p> <p>4. <b>**Avoid Raw or Undercooked Meat**</b>: Eating raw or undercooked pork, deer meat, and shellfish can be a risk factor for hepatitis E, so these should be completely avoided.</p> |

|  |                                                                                                                                                                                                                                                                                                                                                                                                                                                       |
|--|-------------------------------------------------------------------------------------------------------------------------------------------------------------------------------------------------------------------------------------------------------------------------------------------------------------------------------------------------------------------------------------------------------------------------------------------------------|
|  | <p>5. <b>**Personal Items:**</b> Do not share personal items such as toothbrushes, eating utensils, or towels, which might help in transmitting the virus.</p> <p>6. <b>**Disinfect Surfaces:**</b> Regularly disinfect surfaces that are frequently touched, such as doorknobs, bathroom fixtures, and kitchen counters.</p> <p>Implementing these precautions can significantly reduce the risk of transmitting hepatitis E within a household.</p> |
|--|-------------------------------------------------------------------------------------------------------------------------------------------------------------------------------------------------------------------------------------------------------------------------------------------------------------------------------------------------------------------------------------------------------------------------------------------------------|

Supplementary Table 1c: ChatGPT4.5 Responses to Questions

| Question                    | ChatGPT4.5 Response                                                                                                                                                                                                                                                                                                                                                                                                                                                                                                                                                                                                                                                                                                                                                                                                                                                                                                                                                                                                                                                                                                                                                                                     |
|-----------------------------|---------------------------------------------------------------------------------------------------------------------------------------------------------------------------------------------------------------------------------------------------------------------------------------------------------------------------------------------------------------------------------------------------------------------------------------------------------------------------------------------------------------------------------------------------------------------------------------------------------------------------------------------------------------------------------------------------------------------------------------------------------------------------------------------------------------------------------------------------------------------------------------------------------------------------------------------------------------------------------------------------------------------------------------------------------------------------------------------------------------------------------------------------------------------------------------------------------|
| Topic: Concept              |                                                                                                                                                                                                                                                                                                                                                                                                                                                                                                                                                                                                                                                                                                                                                                                                                                                                                                                                                                                                                                                                                                                                                                                                         |
| 1. What is viral hepatitis? | <p>Viral hepatitis refers to inflammation of the liver caused by viral infections. There are several types of viral hepatitis, each caused by a different virus. The most common types are hepatitis A, hepatitis B, hepatitis C, hepatitis D, and hepatitis E. These viruses can be transmitted through various means including contaminated food or water (hepatitis A and E), blood and bodily fluids (hepatitis B, C, and D), or sexual contact.</p> <p>Each type of viral hepatitis can vary in severity and duration of illness. Some people may experience acute infection with symptoms such as fatigue, nausea, abdominal pain, jaundice (yellowing of the skin and eyes), and dark urine. In some cases, viral hepatitis can lead to chronic liver disease, liver cirrhosis, or even liver cancer if left untreated.</p> <p>Prevention strategies such as vaccination (for hepatitis A and B), practicing good hygiene, avoiding risky behaviors such as sharing needles or having unprotected sex, and screening of blood products have been effective in reducing the incidence of viral hepatitis. Treatment options vary depending on the type of hepatitis and may include antiviral</p> |

|                                                   |                                                                                                                                                                                                                                                                                                                                                                                                                                                                                                                                                                                                                                                                                                                                                                                                                                                                                                                                                                                                                                                                                                                                                                                                                                                                                                                                                                                                                                                                                                                               |
|---------------------------------------------------|-------------------------------------------------------------------------------------------------------------------------------------------------------------------------------------------------------------------------------------------------------------------------------------------------------------------------------------------------------------------------------------------------------------------------------------------------------------------------------------------------------------------------------------------------------------------------------------------------------------------------------------------------------------------------------------------------------------------------------------------------------------------------------------------------------------------------------------------------------------------------------------------------------------------------------------------------------------------------------------------------------------------------------------------------------------------------------------------------------------------------------------------------------------------------------------------------------------------------------------------------------------------------------------------------------------------------------------------------------------------------------------------------------------------------------------------------------------------------------------------------------------------------------|
|                                                   | medications, supportive care, and in some cases, liver transplantation.                                                                                                                                                                                                                                                                                                                                                                                                                                                                                                                                                                                                                                                                                                                                                                                                                                                                                                                                                                                                                                                                                                                                                                                                                                                                                                                                                                                                                                                       |
| 2. What diseases are included in viral hepatitis? | <p>Viral hepatitis encompasses several types of liver inflammation caused by different viruses. The main types are:</p> <ol style="list-style-type: none"> <li>1. <b>Hepatitis A (HAV)</b>: Typically transmitted through contaminated food or water, Hepatitis A is usually acute and doesn't lead to chronic infection.</li> <li>2. <b>Hepatitis B (HBV)</b>: Transmitted through contact with infectious body fluids, such as blood or semen. It can be acute or chronic and can lead to serious liver damage, including cirrhosis or liver cancer.</li> <li>3. <b>Hepatitis C (HCV)</b>: Mainly spread through blood-to-blood contact, often through sharing needles or other equipment to inject drugs. Hepatitis C can cause both acute and chronic infections, and if left untreated, it can lead to severe liver damage.</li> <li>4. <b>Hepatitis D (HDV)</b>: This type only occurs in those who are infected with Hepatitis B. HDV is transmitted through contact with infected blood and can lead to a more severe form of hepatitis than HBV alone.</li> <li>5. <b>Hepatitis E (HEV)</b>: Commonly transmitted through consumption of contaminated water, Hepatitis E usually resolves on its own, but it can be dangerous in pregnant women or people with weakened immune systems.</li> </ol> <p>Each type of viral hepatitis has distinct characteristics in terms of transmission, severity, and potential outcomes, so it's important to differentiate between them for proper diagnosis and management.</p> |
| 3. What is a full hepatitis panel?                | <p>A full hepatitis panel, also known as a viral hepatitis panel, is a series of blood tests used to diagnose and monitor hepatitis infections. It typically includes tests for hepatitis A, hepatitis B, and hepatitis C viruses. Here's what each component typically includes:</p> <ol style="list-style-type: none"> <li>1. <b>Hepatitis A Virus (HAV) testing</b>: This test detects antibodies produced by the body in response to the hepatitis A</li> </ol>                                                                                                                                                                                                                                                                                                                                                                                                                                                                                                                                                                                                                                                                                                                                                                                                                                                                                                                                                                                                                                                           |

|                                   |                                                                                                                                                                                                                                                                                                                                                                                                                                                                                                                                                                                                                                                                                                                                                                                                                                                                                                                                                                                                                                                                                                                                                                                                                                                                                                                                                                                                                                                                                                                                                                                                                                                                                                                                                                     |
|-----------------------------------|---------------------------------------------------------------------------------------------------------------------------------------------------------------------------------------------------------------------------------------------------------------------------------------------------------------------------------------------------------------------------------------------------------------------------------------------------------------------------------------------------------------------------------------------------------------------------------------------------------------------------------------------------------------------------------------------------------------------------------------------------------------------------------------------------------------------------------------------------------------------------------------------------------------------------------------------------------------------------------------------------------------------------------------------------------------------------------------------------------------------------------------------------------------------------------------------------------------------------------------------------------------------------------------------------------------------------------------------------------------------------------------------------------------------------------------------------------------------------------------------------------------------------------------------------------------------------------------------------------------------------------------------------------------------------------------------------------------------------------------------------------------------|
|                                   | <p>virus. It helps determine if a person has been infected with the hepatitis A virus or has been vaccinated against it.</p> <p>2. <b>Hepatitis B Surface Antigen (HBsAg) testing:</b> HBsAg is a protein on the surface of the hepatitis B virus. This test detects the presence of HBsAg in the blood, indicating an active hepatitis B infection. It is usually the first test ordered when hepatitis B infection is suspected.</p> <p>3. <b>Hepatitis B Surface Antibody (anti-HBs) testing:</b> This test detects antibodies produced by the body in response to the hepatitis B virus. It can indicate whether a person has recovered from a past hepatitis B infection or has been successfully vaccinated against hepatitis B.</p> <p>4. <b>Hepatitis B Core Antibody (anti-HBc) testing:</b> This test detects antibodies against the hepatitis B core antigen. It can help determine whether a person has been exposed to the hepatitis B virus at some point in the past, regardless of whether the infection was acute or chronic.</p> <p>5. <b>Hepatitis C Virus (HCV) testing:</b> This test detects antibodies produced by the body in response to the hepatitis C virus. It indicates whether a person has been infected with the hepatitis C virus. Further testing, such as HCV RNA testing, may be done to confirm the presence of the virus and determine the viral load.</p> <p>In addition to these tests, a full hepatitis panel may also include liver function tests (LFTs) to assess the overall health of the liver and evaluate the extent of liver damage caused by hepatitis infections. These tests typically measure levels of enzymes and proteins in the blood that are released by the liver when it is damaged or inflamed.</p> |
| 4. What is hepatitis B virus DNA? | <p>Hepatitis B virus (HBV) DNA refers to the genetic material of the hepatitis B virus. HBV is a partially double-stranded DNA virus belonging to the Hepadnaviridae family. Its genome consists of a circular DNA molecule that contains four overlapping open reading frames (ORFs) encoding various viral proteins necessary for its replication and assembly.</p> <p>Detection of HBV DNA in a person's blood is an important diagnostic marker for hepatitis B infection, indicating active</p>                                                                                                                                                                                                                                                                                                                                                                                                                                                                                                                                                                                                                                                                                                                                                                                                                                                                                                                                                                                                                                                                                                                                                                                                                                                                |

|                                   |                                                                                                                                                                                                                                                                                                                                                                                                                                                                                                                                                                                                                                                                                                                                                                                                                                                         |
|-----------------------------------|---------------------------------------------------------------------------------------------------------------------------------------------------------------------------------------------------------------------------------------------------------------------------------------------------------------------------------------------------------------------------------------------------------------------------------------------------------------------------------------------------------------------------------------------------------------------------------------------------------------------------------------------------------------------------------------------------------------------------------------------------------------------------------------------------------------------------------------------------------|
|                                   | <p>viral replication. Quantification of HBV DNA levels is also crucial for monitoring the progression of the infection, assessing the efficacy of antiviral treatment, and determining the risk of transmission to others.</p> <p>In clinical practice, measuring HBV DNA levels using molecular techniques like polymerase chain reaction (PCR) is a key tool in managing hepatitis B infection, guiding treatment decisions, and evaluating the response to therapy.</p>                                                                                                                                                                                                                                                                                                                                                                              |
| 5. What is hepatitis C virus RNA? | <p>Hepatitis C virus (HCV) RNA refers to the genetic material of the hepatitis C virus. HCV is an RNA virus, meaning its genetic material is composed of ribonucleic acid (RNA) rather than deoxyribonucleic acid (DNA) like our own genetic material. The RNA of the hepatitis C virus carries the genetic instructions necessary for the virus to replicate itself within host cells and cause infection. Testing for HCV RNA is important in diagnosing hepatitis C infection and monitoring the effectiveness of treatment, as it indicates the presence of active viral replication in the body.</p>                                                                                                                                                                                                                                               |
| 6. What is hepatitis E virus RNA? | <p>Hepatitis E virus RNA refers to the genetic material of the hepatitis E virus (HEV) that is composed of ribonucleic acid (RNA). HEV is a single-stranded RNA virus belonging to the Hepeviridae family. The RNA of the hepatitis E virus carries the genetic information necessary for viral replication and production of viral proteins. Infection with HEV typically occurs through the consumption of contaminated food or water, and it can cause acute hepatitis, which is inflammation of the liver. This virus is a significant cause of hepatitis outbreaks in developing countries, although sporadic cases and outbreaks have also been reported in developed regions. Understanding the RNA structure and characteristics of HEV is essential for developing diagnostic tests, vaccines, and antiviral therapies against this virus.</p> |
| 7. What is chronic hepatitis B?   | <p>Chronic hepatitis B is a medical condition characterized by long-term inflammation of the liver due to infection with the hepatitis B virus (HBV). Unlike acute hepatitis B, which resolves within a few months, chronic hepatitis B persists for six months or longer.</p> <p>This condition can lead to liver damage, cirrhosis (scarring of the liver), and even liver cancer if left untreated. Chronic hepatitis B is a serious health concern worldwide, particularly in regions where the virus is endemic.</p> <p>Common symptoms of chronic hepatitis B include fatigue, abdominal pain, jaundice (yellowing of the skin and eyes), dark urine, and clay-colored stools. However, some individuals with chronic hepatitis B may not experience any</p>                                                                                      |

|                                                                      |                                                                                                                                                                                                                                                                                                                                                                                                                                                                                                                                                                                                                                                                                                                                                                                                                                                                                                                                                                                                                                                                                                                                                                                                            |
|----------------------------------------------------------------------|------------------------------------------------------------------------------------------------------------------------------------------------------------------------------------------------------------------------------------------------------------------------------------------------------------------------------------------------------------------------------------------------------------------------------------------------------------------------------------------------------------------------------------------------------------------------------------------------------------------------------------------------------------------------------------------------------------------------------------------------------------------------------------------------------------------------------------------------------------------------------------------------------------------------------------------------------------------------------------------------------------------------------------------------------------------------------------------------------------------------------------------------------------------------------------------------------------|
|                                                                      | <p>symptoms, especially in the early stages of the disease.</p> <p>Treatment for chronic hepatitis B aims to slow the progression of liver damage, reduce the risk of complications, and lower the amount of HBV in the body. This typically involves antiviral medications and regular monitoring of liver function and viral levels. In some cases, liver transplantation may be necessary for individuals with advanced liver disease. Vaccination against hepatitis B is also an important preventive measure, especially for those at high risk of infection.</p>                                                                                                                                                                                                                                                                                                                                                                                                                                                                                                                                                                                                                                     |
| 8. What is chronic hepatitis C?                                      | <p>Chronic hepatitis C is a persistent viral infection caused by the hepatitis C virus (HCV). Unlike acute hepatitis C, which is a short-term illness that occurs within the first six months after exposure to the virus, chronic hepatitis C is a long-term condition that persists for six months or more.</p> <p>This condition develops when the body is unable to clear the hepatitis C virus, leading to ongoing inflammation and damage to the liver. Over time, chronic hepatitis C can progress to more severe liver problems such as cirrhosis (scarring of the liver), liver failure, and even liver cancer.</p> <p>Treatment for chronic hepatitis C has evolved significantly in recent years with the advent of direct-acting antiviral medications, which have revolutionized therapy by offering high cure rates with relatively few side effects. However, it's important for individuals with chronic hepatitis C to be regularly monitored by a healthcare provider, as early detection and intervention can help prevent progression to advanced liver disease. Ultimately, staying informed and proactive about one's health is key in managing chronic hepatitis C effectively.</p> |
| <b>Topic: Risk Factors</b>                                           |                                                                                                                                                                                                                                                                                                                                                                                                                                                                                                                                                                                                                                                                                                                                                                                                                                                                                                                                                                                                                                                                                                                                                                                                            |
| 9. Under what conditions is one more likely to contract hepatitis A? | <p>Hepatitis A is a viral liver disease typically spread through contaminated food or water, or close contact with an infected person. Here are some conditions that increase the likelihood of contracting hepatitis A:</p> <ol style="list-style-type: none"> <li>1. <b>Poor Sanitation:</b> In regions where sanitation standards are low, there's a higher risk of hepatitis A due to contaminated water sources or improper handling of food.</li> </ol>                                                                                                                                                                                                                                                                                                                                                                                                                                                                                                                                                                                                                                                                                                                                              |

|                                                                       |                                                                                                                                                                                                                                                                                                                                                                                                                                                                                                                                                                                                                                                                                                                                                                                                                                                                                                                                                                                                                                                                                                                                                                                                                                                                                                                                                                             |
|-----------------------------------------------------------------------|-----------------------------------------------------------------------------------------------------------------------------------------------------------------------------------------------------------------------------------------------------------------------------------------------------------------------------------------------------------------------------------------------------------------------------------------------------------------------------------------------------------------------------------------------------------------------------------------------------------------------------------------------------------------------------------------------------------------------------------------------------------------------------------------------------------------------------------------------------------------------------------------------------------------------------------------------------------------------------------------------------------------------------------------------------------------------------------------------------------------------------------------------------------------------------------------------------------------------------------------------------------------------------------------------------------------------------------------------------------------------------|
|                                                                       | <p>2. <b>**Traveling to Endemic Areas:**</b> Visiting regions where hepatitis A is more prevalent increases the risk. This is particularly true in developing countries where sanitation may be inadequate.</p> <p>3. <b>**Close Contact with Infected Individuals:**</b> Sharing living quarters or having intimate contact with someone who has hepatitis A increases the risk of transmission.</p> <p>4. <b>**Consumption of Contaminated Food or Water:**</b> Eating or drinking something that has been contaminated with the virus can lead to infection. This is more common in areas with poor sanitation or inadequate food safety practices.</p> <p>5. <b>**Occupational Exposure:**</b> Certain occupations, such as healthcare workers or food handlers, may have an increased risk of exposure to the hepatitis A virus due to their proximity to potentially contaminated materials or individuals.</p> <p>6. <b>**Living in Crowded or Unsanitary Conditions:**</b> People living in crowded or unsanitary conditions, such as homeless shelters or refugee camps, are at higher risk due to the ease of transmission in such environments.</p> <p>Taking preventive measures like getting vaccinated, practicing good hygiene, and avoiding consumption of potentially contaminated food and water can help reduce the risk of contracting hepatitis A.</p> |
| 10. Under what conditions is one more likely to contract hepatitis B? | <p>Hepatitis B is primarily transmitted through contact with infected blood or bodily fluids. Here are some conditions that increase the likelihood of contracting hepatitis B:</p> <p>1. <b>**Unprotected Sex:**</b> Engaging in sexual activity without using a condom with an infected person increases the risk of contracting hepatitis B.</p> <p>2. <b>**Sharing Needles:**</b> Sharing needles or syringes contaminated with infected blood, commonly associated with drug use, can transmit hepatitis B.</p>                                                                                                                                                                                                                                                                                                                                                                                                                                                                                                                                                                                                                                                                                                                                                                                                                                                        |

3. **Mother to Child Transmission:** Pregnant women infected with hepatitis B can pass the virus to their babies during childbirth.
  4. **Sharing Personal Items:** Sharing personal items such as razors, toothbrushes, or needles with an infected person can lead to transmission if there is exposure to infected blood.
  5. **Medical Procedures:** Inadequate sterilization of medical equipment, especially in healthcare settings with poor infection control practices, can lead to the transmission of hepatitis B.
  6. **Occupational Exposure:** Healthcare workers, emergency responders, and others who may come into contact with blood or bodily fluids are at higher risk if proper precautions are not taken.
  7. **Blood Transfusions:** Although rare in areas with stringent blood screening procedures, receiving blood transfusions or organ transplants from infected donors can transmit hepatitis B.
  8. **Tattoos and Piercings:** Procedures involving needles or instruments that may not be properly sterilized can transmit hepatitis B if they come into contact with infected blood.
  9. **Invasive Procedures:** Receiving acupuncture, body piercing, or tattooing from unlicensed or inadequately trained providers who do not follow proper sterilization procedures increases the risk.
  10. **Traveling to Endemic Areas:** Traveling to regions where hepatitis B is prevalent and coming into contact with contaminated blood or bodily fluids through various means increases the risk of contracting the virus.
- Prevention strategies such as vaccination, practicing safe sex, avoiding sharing needles, ensuring medical procedures



|                                                                       |                                                                                                                                                                                                                                                                                                                                                                                                                                                                                                                                                                                                                                                                                                                                                                                                                                                                                                                                                                                                                                                                                                                                                                                                                                                                          |
|-----------------------------------------------------------------------|--------------------------------------------------------------------------------------------------------------------------------------------------------------------------------------------------------------------------------------------------------------------------------------------------------------------------------------------------------------------------------------------------------------------------------------------------------------------------------------------------------------------------------------------------------------------------------------------------------------------------------------------------------------------------------------------------------------------------------------------------------------------------------------------------------------------------------------------------------------------------------------------------------------------------------------------------------------------------------------------------------------------------------------------------------------------------------------------------------------------------------------------------------------------------------------------------------------------------------------------------------------------------|
|                                                                       | are performed using sterile equipment, and implementing proper infection control measures can significantly reduce the risk of contracting hepatitis B.                                                                                                                                                                                                                                                                                                                                                                                                                                                                                                                                                                                                                                                                                                                                                                                                                                                                                                                                                                                                                                                                                                                  |
| 11. Under what conditions is one more likely to contract hepatitis E? | <p>Hepatitis E is typically transmitted through the fecal-oral route, often due to contaminated water or food. Therefore, individuals are more likely to contract hepatitis E in areas with poor sanitation and limited access to clean water. Additionally, factors such as consuming undercooked or raw pork, deer, or shellfish can increase the risk of transmission. Traveling to regions where hepatitis E is endemic also poses a higher risk of contracting the virus. Individuals with compromised immune systems or underlying liver disease may be more susceptible to severe forms of hepatitis E if they become infected. Overall, practicing good hygiene, avoiding consumption of potentially contaminated food or water, and getting vaccinated in high-risk areas can help reduce the likelihood of contracting hepatitis E.</p>                                                                                                                                                                                                                                                                                                                                                                                                                        |
| 12. Under what conditions is one more likely to contract hepatitis C? | <p>Hepatitis C is primarily spread through contact with infected blood. Some common scenarios where one might be at higher risk of contracting hepatitis C include:</p> <ol style="list-style-type: none"> <li>1. <b>**Injection Drug Use**</b>: Sharing needles or other equipment for injecting drugs greatly increases the risk of hepatitis C transmission.</li> <li>2. <b>**Blood Transfusions or Organ Transplants before 1992**</b>: Before widespread screening of blood donations began in 1992, there was a risk of receiving contaminated blood or organs.</li> <li>3. <b>**Occupational Exposure**</b>: Healthcare workers or others who are exposed to blood in their work environment may be at higher risk if proper precautions are not taken.</li> <li>4. <b>**Unprotected Sexual Contact**</b>: While the risk is lower than with other modes of transmission, engaging in unprotected sexual activity with an infected person can transmit hepatitis C, especially if there are other risk factors involved such as having multiple sexual partners or engaging in rough sex that could cause bleeding.</li> <li>5. <b>**Mother-to-Child Transmission**</b>: Pregnant women with hepatitis C can transmit the virus to their babies during</li> </ol> |

|                                                                       |                                                                                                                                                                                                                                                                                                                                                                                                                                                                                                                                                                                                                                                                                                                                                                                                                                                                                                                                                                                                                                                                                                                                                                                                                                                |
|-----------------------------------------------------------------------|------------------------------------------------------------------------------------------------------------------------------------------------------------------------------------------------------------------------------------------------------------------------------------------------------------------------------------------------------------------------------------------------------------------------------------------------------------------------------------------------------------------------------------------------------------------------------------------------------------------------------------------------------------------------------------------------------------------------------------------------------------------------------------------------------------------------------------------------------------------------------------------------------------------------------------------------------------------------------------------------------------------------------------------------------------------------------------------------------------------------------------------------------------------------------------------------------------------------------------------------|
|                                                                       | <p>childbirth, although the risk is relatively low.</p> <p>6. <b>**Tattooing or Body Piercing with Unsterile Equipment**</b>: If the equipment used for tattooing or body piercing is not properly sterilized, there's a risk of hepatitis C transmission.</p> <p>7. <b>**Sharing Personal Items**</b>: Sharing items such as razors or toothbrushes that may come into contact with blood can also pose a risk, although it's less common than other modes of transmission.</p> <p>It's important to note that hepatitis C is not spread through casual contact such as hugging, kissing, or sharing utensils. Taking precautions such as using clean needles for injections, practicing safe sex, and avoiding sharing personal items can help reduce the risk of contracting hepatitis C.</p>                                                                                                                                                                                                                                                                                                                                                                                                                                               |
| 13. Under what conditions is one more likely to contract hepatitis D? | <p>Hepatitis D is a serious liver infection caused by the hepatitis D virus (HDV), which can only propagate in the presence of the hepatitis B virus (HBV). The conditions under which one is more likely to contract hepatitis D include:</p> <p>### 1. <b>**Existing Hepatitis B Infection**</b></p> <ul style="list-style-type: none"> <li>- <b>**Co-infection and Superinfection**</b>: HDV requires HBV to replicate. Therefore, individuals who are already infected with hepatitis B are at risk. <ul style="list-style-type: none"> <li>- <b>**Co-infection**</b> occurs when a person acquires both HBV and HDV simultaneously.</li> <li>- <b>**Superinfection**</b> occurs when someone with chronic HBV infection acquires HDV later.</li> </ul> </li> </ul> <p>### 2. <b>**High-Risk Behaviors**</b></p> <ul style="list-style-type: none"> <li>- <b>**Intravenous Drug Use**</b>: Sharing needles can transmit both HBV and HDV.</li> <li>- <b>**Unprotected Sexual Activity**</b>: Engaging in unprotected sex with an infected person can lead to transmission.</li> <li>- <b>**Tattoos or Piercings**</b>: Receiving tattoos or piercings with non-sterile equipment.</li> </ul> <p>### 3. <b>**Geographical Factors**</b></p> |

- **\*\*Endemic Areas:\*\*** Regions with high HBV prevalence, such as parts of Africa, South America, Eastern Europe, and the Mediterranean, also have higher HDV incidence.

#### ### 4. **\*\*Lack of Vaccination\*\***

- **\*\*No HBV Vaccination:\*\*** Individuals who are not vaccinated against HBV are at a higher risk of contracting HBV, and consequently HDV.

#### ### 5. **\*\*Close Contact with Infected Individuals\*\***

- **\*\*Household or Occupational Exposure:\*\*** Living with or being in close contact with someone who has HBV increases the risk.

#### ### 6. **\*\*Healthcare Settings\*\***

- **\*\*Needlestick Injuries:\*\*** Healthcare workers are at risk through accidental exposure to contaminated blood.

#### ### 7. **\*\*Blood Transfusions\*\***

- **\*\*Unsafe Blood Products:\*\*** Receiving blood products that are not adequately screened for HBV and HDV.

#### ### 8. **\*\*Immunocompromised State\*\***

- **\*\*Weakened Immune System:\*\*** Individuals with weakened immune systems are more susceptible to infections, including HBV and HDV.

#### ### 9. **\*\*Poor Socioeconomic Conditions\*\***

- **\*\*Limited Access to Healthcare:\*\*** Lack of access to adequate healthcare services for HBV vaccination and treatment increases the risk.

#### ### Prevention Strategies

|                                                                                                                        |                                                                                                                                                                                                                                                                                                                                                                                                                                                                                                                                                                                                                                                                                                                                                                                                                                                                                                                                                                                                                                                                                                                                                                                                                                                                                                                                                                                                                                       |
|------------------------------------------------------------------------------------------------------------------------|---------------------------------------------------------------------------------------------------------------------------------------------------------------------------------------------------------------------------------------------------------------------------------------------------------------------------------------------------------------------------------------------------------------------------------------------------------------------------------------------------------------------------------------------------------------------------------------------------------------------------------------------------------------------------------------------------------------------------------------------------------------------------------------------------------------------------------------------------------------------------------------------------------------------------------------------------------------------------------------------------------------------------------------------------------------------------------------------------------------------------------------------------------------------------------------------------------------------------------------------------------------------------------------------------------------------------------------------------------------------------------------------------------------------------------------|
|                                                                                                                        | <p>- <b>**Vaccination:**</b> Effective vaccination against HBV can prevent HDV infection.</p> <p>- <b>**Safe Practices:**</b> Avoiding high-risk behaviors, ensuring safe medical practices, and using sterile equipment for tattoos and piercings.</p> <p>Understanding these conditions can help in taking preventive measures and reducing the risk of contracting hepatitis D.</p> <p>---</p> <p>Feel free to ask if you need more details or have other questions related to hepatitis D or other health concerns!</p>                                                                                                                                                                                                                                                                                                                                                                                                                                                                                                                                                                                                                                                                                                                                                                                                                                                                                                           |
| 14. Is hepatitis B hereditary? My mother has hepatitis B; what should I be aware of? Should I undergo further testing? | <p>Hepatitis B is not hereditary in the sense that it is not passed down genetically from parents to children. However, it can be transmitted from mother to child during childbirth or through contact with infectious body fluids. Here's what you should be aware of and the steps you might consider:</p> <p>### Understanding Transmission and Risks:</p> <ol style="list-style-type: none"> <li>1. <b>**Mother-to-Child Transmission**</b>: Hepatitis B can be transmitted from an infected mother to her newborn during childbirth. If your mother has hepatitis B, there is a possibility that you could have been exposed at birth.</li> <li>2. <b>**Body Fluid Transmission**</b>: The virus can also be spread through contact with infected blood, semen, or other body fluids. This means that sharing needles, sexual contact, or other direct blood contact with an infected person can spread the virus.</li> </ol> <p>### Recommendations for Testing:</p> <ol style="list-style-type: none"> <li>1. <b>**Hepatitis B Testing**</b>: Given your mother's status, it's advisable to get tested for hepatitis B. Testing typically involves: <ul style="list-style-type: none"> <li>- <b>**HBsAg (Hepatitis B Surface Antigen)**</b>: Indicates current infection.</li> <li>- <b>**Anti-HBs (Hepatitis B Surface Antibody)**</b>: Indicates immunity either from past infection or vaccination.</li> </ul> </li> </ol> |

|                 |                                                                                                                                                                                                                                                                                                                                                                                                                                                                                                                                                                                                                                                                                                                                                                                                                                                                                                                                                                                                                                                                                                                                                                                                                                                                                                                                                                                                                                                                                                                                                             |
|-----------------|-------------------------------------------------------------------------------------------------------------------------------------------------------------------------------------------------------------------------------------------------------------------------------------------------------------------------------------------------------------------------------------------------------------------------------------------------------------------------------------------------------------------------------------------------------------------------------------------------------------------------------------------------------------------------------------------------------------------------------------------------------------------------------------------------------------------------------------------------------------------------------------------------------------------------------------------------------------------------------------------------------------------------------------------------------------------------------------------------------------------------------------------------------------------------------------------------------------------------------------------------------------------------------------------------------------------------------------------------------------------------------------------------------------------------------------------------------------------------------------------------------------------------------------------------------------|
|                 | <p>- <b>Anti-HBc (Hepatitis B Core Antibody)</b>: Indicates past or current infection.</p> <p>2. <b>Vaccine Status</b>: Check if you have been vaccinated against hepatitis B. The vaccine is highly effective and can protect you from future infections.</p> <p><b>Steps to Take if You Test Positive:</b></p> <p>1. <b>Consult a Healthcare Provider</b>: If you test positive for hepatitis B, a healthcare provider will guide you on the next steps, including further testing and possible treatment options.</p> <p>2. <b>Monitor Liver Health</b>: Chronic hepatitis B can lead to liver damage over time. Regular monitoring of liver function through blood tests and possibly liver ultrasounds is essential.</p> <p>3. <b>Avoid Transmission</b>: Take precautions to avoid transmitting the virus to others. This includes practicing safe sex, not sharing needles or personal items like razors, and informing healthcare providers of your status.</p> <p><b>Preventive Measures:</b></p> <p>1. <b>Vaccination</b>: If you test negative and have not been vaccinated, getting the hepatitis B vaccine is recommended.</p> <p>2. <b>Safe Practices</b>: Practice safe handling of body fluids and follow infection control guidelines to prevent transmission to others.</p> <p>3. <b>Regular Check-ups</b>: Regular medical check-ups can help in early detection and management of any potential health issues related to hepatitis B.</p> <p>Would you like more detailed information on testing procedures or preventive measures?</p> |
| Topic: Diagnose |                                                                                                                                                                                                                                                                                                                                                                                                                                                                                                                                                                                                                                                                                                                                                                                                                                                                                                                                                                                                                                                                                                                                                                                                                                                                                                                                                                                                                                                                                                                                                             |

|                                                                                       |                                                                                                                                                                                                                                                                                                                                                                                                                                                                                                                                                                                                                                                                                                                                                                                                                                                                                                                                                                                                                                                                                                                                                                                                                                                                                                                                                                                                                                                                                                                                                                                                                                                                                                                                                                                                                                    |
|---------------------------------------------------------------------------------------|------------------------------------------------------------------------------------------------------------------------------------------------------------------------------------------------------------------------------------------------------------------------------------------------------------------------------------------------------------------------------------------------------------------------------------------------------------------------------------------------------------------------------------------------------------------------------------------------------------------------------------------------------------------------------------------------------------------------------------------------------------------------------------------------------------------------------------------------------------------------------------------------------------------------------------------------------------------------------------------------------------------------------------------------------------------------------------------------------------------------------------------------------------------------------------------------------------------------------------------------------------------------------------------------------------------------------------------------------------------------------------------------------------------------------------------------------------------------------------------------------------------------------------------------------------------------------------------------------------------------------------------------------------------------------------------------------------------------------------------------------------------------------------------------------------------------------------|
| <p>15. What clinical symptoms should be considered for viral hepatitis diagnosis?</p> | <p>Viral hepatitis is an inflammation of the liver caused by a virus. There are several types of viral hepatitis, including hepatitis A, B, C, D, and E, each with distinct clinical presentations. For diagnosing viral hepatitis, consider the following clinical symptoms:</p> <p>### **Common Symptoms for All Types of Viral Hepatitis:**</p> <ol style="list-style-type: none"> <li>1. <b>Jaundice</b>: Yellowing of the skin and eyes due to high levels of bilirubin in the blood.</li> <li>2. <b>Fatigue</b>: A persistent feeling of tiredness and lack of energy.</li> <li>3. <b>Fever</b>: Often low-grade, but can vary.</li> <li>4. <b>Dark Urine</b>: Due to bilirubin being excreted in the urine.</li> <li>5. <b>Clay-Colored Stools</b>: Light-colored stools due to the liver's inability to process bilirubin.</li> <li>6. <b>Nausea and Vomiting</b>: Common gastrointestinal symptoms.</li> <li>7. <b>Abdominal Pain</b>: Especially in the upper right quadrant where the liver is located.</li> <li>8. <b>Loss of Appetite</b>: Decreased desire to eat.</li> <li>9. <b>Joint Pain</b>: Often associated with hepatitis B.</li> </ol> <p>### **Specific Symptoms by Hepatitis Type:**</p> <p>#### <b>Hepatitis A:</b></p> <ul style="list-style-type: none"> <li>- <b>Acute Onset</b>: Sudden symptoms.</li> <li>- <b>Flu-like Symptoms</b>: Including headache and body aches.</li> <li>- <b>Pruritus</b>: Itching of the skin.</li> </ul> <p>#### <b>Hepatitis B:</b></p> <ul style="list-style-type: none"> <li>- <b>Joint and Muscle Pain</b>: More pronounced.</li> <li>- <b>Longer Incubation Period</b>: Symptoms may appear 1 to 4 months after exposure.</li> <li>- <b>Chronic Infection Potential</b>: Can progress to chronic hepatitis, leading to more severe liver complications.</li> </ul> |
|---------------------------------------------------------------------------------------|------------------------------------------------------------------------------------------------------------------------------------------------------------------------------------------------------------------------------------------------------------------------------------------------------------------------------------------------------------------------------------------------------------------------------------------------------------------------------------------------------------------------------------------------------------------------------------------------------------------------------------------------------------------------------------------------------------------------------------------------------------------------------------------------------------------------------------------------------------------------------------------------------------------------------------------------------------------------------------------------------------------------------------------------------------------------------------------------------------------------------------------------------------------------------------------------------------------------------------------------------------------------------------------------------------------------------------------------------------------------------------------------------------------------------------------------------------------------------------------------------------------------------------------------------------------------------------------------------------------------------------------------------------------------------------------------------------------------------------------------------------------------------------------------------------------------------------|

#### #### \*\*Hepatitis C:\*\*

- \*\*Often Asymptomatic Initially\*\*: Many patients do not show symptoms for years.
- \*\*Chronic Liver Disease\*\*: High risk of progressing to chronic hepatitis and liver cirrhosis.

#### #### \*\*Hepatitis D:\*\*

- \*\*Co-infection or Superinfection with Hepatitis B\*\*: Requires hepatitis B to replicate.
- \*\*More Severe Symptoms\*\*: Often leads to more severe liver damage.

#### #### \*\*Hepatitis E:\*\*

- \*\*Similar to Hepatitis A\*\*: Often causes acute symptoms and resolves on its own.
- \*\*Severe in Pregnant Women\*\*: Can lead to fulminant hepatitis, especially in the third trimester.

#### ### \*\*Advanced Symptoms of Chronic Hepatitis (B and C):\*\*

- \*\*Ascites\*\*: Accumulation of fluid in the abdomen.
- \*\*Hepatic Encephalopathy\*\*: Confusion, altered level of consciousness due to liver failure.
- \*\*Spider Angiomas\*\*: Small, spider-like blood vessels visible under the skin.
- \*\*Gynecomastia\*\*: Enlarged breast tissue in men.
- \*\*Palmar Erythema\*\*: Redness of the palms.

#### ### \*\*Laboratory Findings Supporting Diagnosis:\*\*

- \*\*Elevated Liver Enzymes (ALT and AST)\*\*: Indicative of liver inflammation.
- \*\*Elevated Bilirubin\*\*: Correlates with jaundice.
- \*\*Positive Serological Markers\*\*: Specific antibodies or viral antigens depending on the type of hepatitis.

#### ### \*\*When to Consider Viral Hepatitis:\*\*

|                                                                                |                                                                                                                                                                                                                                                                                                                                                                                                                                                                                                                                                                                                                                                                                                                                                                                                                                                                                                                                                                                                                                                                                                                                         |
|--------------------------------------------------------------------------------|-----------------------------------------------------------------------------------------------------------------------------------------------------------------------------------------------------------------------------------------------------------------------------------------------------------------------------------------------------------------------------------------------------------------------------------------------------------------------------------------------------------------------------------------------------------------------------------------------------------------------------------------------------------------------------------------------------------------------------------------------------------------------------------------------------------------------------------------------------------------------------------------------------------------------------------------------------------------------------------------------------------------------------------------------------------------------------------------------------------------------------------------|
|                                                                                | <p>- <b>History of Risk Factors</b>: Intravenous drug use, unprotected sexual contact, travel to endemic areas, ingestion of contaminated food or water.</p> <p>- <b>Unexplained Liver Function Abnormalities</b>: In patients without obvious cause.</p> <p>### <b>Conclusion</b>:</p> <p>Early recognition and diagnosis of viral hepatitis are crucial for effective management and prevention of complications. If you suspect viral hepatitis based on the symptoms and history, laboratory tests and serological markers should be employed for confirmation.</p> <p>If you have any specific cases or further questions, feel free to ask!</p>                                                                                                                                                                                                                                                                                                                                                                                                                                                                                   |
| 16. What laboratory tests are needed to help doctors diagnose viral hepatitis? | <p>Diagnosing viral hepatitis requires a combination of laboratory tests to identify the presence of the virus, assess liver function, and evaluate the extent of liver damage. Here's a detailed breakdown of the necessary laboratory tests:</p> <p>### 1. <b>Serological Tests</b></p> <p>These tests detect antibodies or antigens related to hepatitis viruses, helping identify the specific type of hepatitis.</p> <p>- <b>Hepatitis A Virus (HAV)</b>:</p> <ul style="list-style-type: none"> <li>- <b>Anti-HAV IgM</b>: Indicates recent or acute infection.</li> <li>- <b>Anti-HAV IgG</b>: Indicates past infection or immunity.</li> </ul> <p>- <b>Hepatitis B Virus (HBV)</b>:</p> <ul style="list-style-type: none"> <li>- <b>HBsAg (Hepatitis B surface antigen)</b>: Indicates current infection.</li> <li>- <b>Anti-HBs</b>: Indicates immunity due to past infection or vaccination.</li> <li>- <b>Anti-HBc IgM</b>: Indicates recent infection.</li> <li>- <b>Anti-HBc IgG</b>: Indicates past or chronic infection.</li> <li>- <b>HBeAg (Hepatitis B e antigen)</b>: Indicates active viral replication.</li> </ul> |



- **Anti-HBe:** Indicates a lower level of viral replication.
- **Hepatitis C Virus (HCV):**
  - **Anti-HCV:** Indicates exposure to the virus.
  - **HCV RNA:** Detects the presence of viral RNA to confirm active infection.
- **Hepatitis D Virus (HDV):**
  - **Anti-HDV:** Indicates HDV infection, usually in someone who is also HBV positive.
  - **HDV RNA:** Confirms active HDV infection.
- **Hepatitis E Virus (HEV):**
  - **Anti-HEV IgM:** Indicates recent infection.
  - **Anti-HEV IgG:** Indicates past infection.

### 2. **Liver Function Tests (LFTs)**

These tests assess the liver's functional status and damage.

- **Alanine Aminotransferase (ALT):** Elevated in liver inflammation or damage.
- **Aspartate Aminotransferase (AST):** Elevated in liver inflammation or damage.
- **Alkaline Phosphatase (ALP):** Elevated in bile duct obstruction or liver damage.
- **Bilirubin:** Elevated in liver dysfunction, causing jaundice.
- **Albumin:** Low levels can indicate chronic liver disease.
- **Prothrombin Time (PT):** Prolonged in severe liver dysfunction.

### 3. **Complete Blood Count (CBC)**

Assesses overall health and detects infections and other disorders:

- **White Blood Cells (WBC):** May be elevated in infection.
- **Platelets:** Often decreased in chronic liver disease.

#### ### 4. **Viral Load Tests**

These quantitative tests measure the amount of virus present in the blood, helping monitor the severity of infection and response to treatment.

- **HBV DNA:** Quantifies hepatitis B viral load.
- **HCV RNA:** Quantifies hepatitis C viral load.

#### ### 5. **Genotype Testing**

Determines the specific strain of the virus, important for treatment planning, especially for HCV.

- **HCV Genotyping:** Identifies the genotype of HCV to tailor antiviral therapy.

#### ### 6. **Liver Biopsy**

Though less common due to non-invasive alternatives, it provides a direct assessment of liver inflammation and fibrosis.

#### ### 7. **Imaging Studies**

Non-invasive methods to evaluate liver damage:

- **Ultrasound:** Detects liver abnormalities and assesses liver size and structure.
- **FibroScan:** Measures liver stiffness to assess fibrosis and cirrhosis.

#### ### 8. **Other Relevant Tests**

|                                                                                               |                                                                                                                                                                                                                                                                                                                                                                                                                                                                                                                                                                                                                                                                                                                                                                                                                                                                                                                                                                                                                                                                        |
|-----------------------------------------------------------------------------------------------|------------------------------------------------------------------------------------------------------------------------------------------------------------------------------------------------------------------------------------------------------------------------------------------------------------------------------------------------------------------------------------------------------------------------------------------------------------------------------------------------------------------------------------------------------------------------------------------------------------------------------------------------------------------------------------------------------------------------------------------------------------------------------------------------------------------------------------------------------------------------------------------------------------------------------------------------------------------------------------------------------------------------------------------------------------------------|
|                                                                                               | <ul style="list-style-type: none"> <li>- <b>Autoimmune Markers:</b> Rule out autoimmune hepatitis.</li> <li>- <b>Metabolic Panel:</b> Assesses overall metabolic function and detects complications of liver disease.</li> </ul> <p>### 9. <b>Molecular and Genetic Tests</b></p> <ul style="list-style-type: none"> <li>- <b>PCR (Polymerase Chain Reaction):</b> Detects viral DNA or RNA.</li> <li>- <b>Genetic Testing:</b> Evaluates predisposition to certain types of hepatitis or liver diseases.</li> </ul> <p>These tests collectively provide a comprehensive picture, allowing for accurate diagnosis, assessment of disease progression, and formulation of an appropriate treatment plan.</p>                                                                                                                                                                                                                                                                                                                                                            |
| 17. During a routine physical examination, is it necessary to perform a full hepatitis panel? | <p>During a routine physical examination, it is not typically necessary to perform a full hepatitis panel unless there are specific risk factors or clinical indications that suggest it might be warranted. Here are some considerations that might justify the need for a hepatitis panel during a routine physical exam:</p> <p>### Risk Factors for Hepatitis:</p> <ol style="list-style-type: none"> <li>1. <b>High-Risk Behaviors:</b> <ul style="list-style-type: none"> <li>- Intravenous drug use.</li> <li>- Unprotected sexual activity with multiple partners.</li> <li>- Men who have sex with men (MSM).</li> </ul> </li> <li>2. <b>History of Blood Transfusions or Organ Transplants:</b> <ul style="list-style-type: none"> <li>- Especially if received before 1992 when screening for hepatitis C became widespread.</li> </ul> </li> <li>3. <b>Occupational Exposure:</b> <ul style="list-style-type: none"> <li>- Healthcare workers or others at risk of needle-stick injuries.</li> </ul> </li> <li>4. <b>Chronic Liver Disease:</b></li> </ol> |

- History of liver disease or elevated liver enzymes.

5. **\*\*Travel to High-Risk Areas:\*\***

- Travel to regions with high prevalence of hepatitis A, B, or C.

6. **\*\*Household or Close Contact:\*\***

- Living with someone who has hepatitis B or C.

7. **\*\*Perinatal Transmission:\*\***

- Born to a mother with hepatitis B or C.

**### Clinical Indications:**

- **\*\*Unexplained Elevated Liver Enzymes:\*\*** Elevated alanine aminotransferase (ALT) or aspartate aminotransferase (AST) levels might prompt testing.
- **\*\*Symptoms of Hepatitis:\*\*** Jaundice, fatigue, abdominal pain, or dark urine.
- **\*\*Evidence of Liver Dysfunction:\*\*** Signs such as hepatomegaly or abnormal liver function tests.

**### Routine Screening Recommendations:**

- **\*\*Hepatitis C:\*\*** Routine screening is recommended for individuals born between 1945 and 1965 and those with risk factors.
- **\*\*Hepatitis B:\*\*** Screening is recommended for people with risk factors, including those from regions with high endemic rates or those who engage in high-risk behaviors.

**### Conclusion:**

In the absence of these risk factors or clinical indications, routine screening for hepatitis during a physical exam is not generally required. However, individual circumstances should always guide the decision, and patients should discuss

|                                                                                         |                                                                                                                                                                                                                                                                                                                                                                                                                                                                                                                                                                                                                                                                                                                                                                                                                                                                                                                                                                                                                                                                                                                                                                                                                                                                                                                                                                                                                                                                                                                                                                                                                                                                                                                                                                                                                                                                                                                                                                                                                                                                                                                                    |
|-----------------------------------------------------------------------------------------|------------------------------------------------------------------------------------------------------------------------------------------------------------------------------------------------------------------------------------------------------------------------------------------------------------------------------------------------------------------------------------------------------------------------------------------------------------------------------------------------------------------------------------------------------------------------------------------------------------------------------------------------------------------------------------------------------------------------------------------------------------------------------------------------------------------------------------------------------------------------------------------------------------------------------------------------------------------------------------------------------------------------------------------------------------------------------------------------------------------------------------------------------------------------------------------------------------------------------------------------------------------------------------------------------------------------------------------------------------------------------------------------------------------------------------------------------------------------------------------------------------------------------------------------------------------------------------------------------------------------------------------------------------------------------------------------------------------------------------------------------------------------------------------------------------------------------------------------------------------------------------------------------------------------------------------------------------------------------------------------------------------------------------------------------------------------------------------------------------------------------------|
|                                                                                         | <p>their specific risk factors and concerns with their healthcare provider.</p>                                                                                                                                                                                                                                                                                                                                                                                                                                                                                                                                                                                                                                                                                                                                                                                                                                                                                                                                                                                                                                                                                                                                                                                                                                                                                                                                                                                                                                                                                                                                                                                                                                                                                                                                                                                                                                                                                                                                                                                                                                                    |
| <p>18. Under what circumstances should co-infection with hepatitis D be considered?</p> | <p>Co-infection with hepatitis D virus (HDV) should be considered under several specific circumstances, as it can significantly impact the management and prognosis of a patient with hepatitis B virus (HBV) infection. Here are the key situations where co-infection with hepatitis D should be evaluated:</p> <p>### 1. <b>Presence of Chronic HBV Infection</b></p> <ul style="list-style-type: none"> <li>- <b>Chronic Carriers</b>: HDV requires HBV to replicate, as it uses the HBV surface antigen (HBsAg) as its envelope protein. Thus, individuals with chronic HBV infection (positive HBsAg for more than 6 months) are at risk for HDV co-infection.</li> <li>- <b>High-Risk Groups</b>: Individuals from regions where both HBV and HDV are endemic or those with behaviors that increase risk, such as intravenous drug use or multiple sexual partners, should be screened for HDV.</li> </ul> <p>### 2. <b>Unexplained Exacerbation of Liver Disease</b></p> <ul style="list-style-type: none"> <li>- <b>Sudden Worsening</b>: Patients with chronic HBV infection who experience an unexpected or unexplained worsening of liver function, such as elevated liver enzymes or signs of cirrhosis, should be evaluated for HDV.</li> <li>- <b>Severe Hepatitis Symptoms</b>: A more severe clinical course of hepatitis, including fulminant hepatitis, in a known HBV patient may suggest co-infection with HDV.</li> </ul> <p>### 3. <b>High-Risk Behavioral Factors</b></p> <ul style="list-style-type: none"> <li>- <b>Intravenous Drug Use</b>: Sharing needles is a common transmission route for both HBV and HDV, making this group particularly vulnerable.</li> <li>- <b>Unprotected Sexual Contact</b>: Individuals with multiple sexual partners, especially in areas with high prevalence rates of HBV and HDV, should be considered for HDV screening.</li> </ul> <p>### 4. <b>Geographic and Demographic Risk Factors</b></p> <ul style="list-style-type: none"> <li>- <b>Endemic Areas</b>: Regions such as the Mediterranean, Middle East, parts of Africa, South America, and some</li> </ul> |

areas of Asia have higher rates of HDV infection. People originating from or frequently traveling to these regions should be evaluated for HDV if they have chronic HBV.

- **Migrant Populations**: Immigrants from high-prevalence areas who have chronic HBV should be assessed for HDV co-infection.

#### ### 5. **History of Blood Transfusions or Organ Transplants**

- **Past Transfusions**: Patients with a history of receiving blood transfusions, especially before widespread HBV and HDV screening of blood products, should be considered for HDV screening.

- **Organ Transplant Recipients**: Those who have received organs from donors with HBV may be at risk for HDV co-infection.

#### ### 6. **HIV Co-infection**

- **Immunocompromised States**: Individuals with HIV, especially those who are also HBV-positive, are at increased risk for HDV and should be routinely screened.

#### ### 7. **Clinical Presentation with Dual Infections**

- **Acute HBV Infection**: If an individual presents with acute hepatitis and has risk factors for both HBV and HDV, co-infection should be considered.

- **Persistent or Severe Symptoms**: Patients with severe, persistent, or recurrent symptoms of hepatitis, particularly in the context of an existing HBV diagnosis, should be evaluated for possible HDV co-infection.

#### ### 8. **Non-Responders to HBV Therapy**

- **Lack of Response to Antiviral Treatment**: If a patient with chronic HBV is not responding to antiviral therapy as expected, HDV co-infection might be a contributing factor.

#### ### 9. **Evidence of Cirrhosis in HBV Patients**

|                                                                        |                                                                                                                                                                                                                                                                                                                                                                                                                                                                                                                                                                                                                                                                                                                                                                                                                                                                                                                                                                   |
|------------------------------------------------------------------------|-------------------------------------------------------------------------------------------------------------------------------------------------------------------------------------------------------------------------------------------------------------------------------------------------------------------------------------------------------------------------------------------------------------------------------------------------------------------------------------------------------------------------------------------------------------------------------------------------------------------------------------------------------------------------------------------------------------------------------------------------------------------------------------------------------------------------------------------------------------------------------------------------------------------------------------------------------------------|
|                                                                        | <p>- <b>Advanced Liver Disease</b>: Patients with chronic HBV who develop cirrhosis or hepatocellular carcinoma (HCC) may have HDV co-infection, which accelerates liver disease progression.</p> <p>### 10. <b>Family History of HDV</b></p> <p>- <b>Genetic and Environmental Factors</b>: A family history of HDV or HBV in an endemic area warrants consideration for HDV screening.</p> <p>### <b>Diagnostic Testing for HDV</b></p> <p>To confirm HDV co-infection, specific diagnostic tests such as anti-HDV antibodies and HDV RNA testing should be performed. Positive anti-HDV IgM indicates recent or acute HDV infection, while anti-HDV IgG suggests past or chronic infection. HDV RNA quantification helps determine active viral replication.</p> <p>By assessing these circumstances, healthcare providers can identify individuals at risk for HDV co-infection and take appropriate steps to manage and treat the condition effectively.</p> |
| 19. Under what circumstances should chronic hepatitis E be considered? | <p>Chronic hepatitis E should be considered in specific clinical scenarios, particularly in individuals with certain risk factors and clinical presentations. Here are key circumstances where chronic hepatitis E should be considered:</p> <p>### 1. <b>Immunocompromised Patients</b></p> <ul style="list-style-type: none"> <li>- <b>Solid Organ Transplant Recipients</b>: Chronic hepatitis E is common in patients who have received organ transplants, particularly those on immunosuppressive therapy.</li> <li>- <b>HIV/AIDS Patients</b>: Individuals with advanced HIV/AIDS, especially with low CD4 counts, are at higher risk.</li> <li>- <b>Patients on Immunosuppressive Therapy</b>: Those receiving treatments for conditions like autoimmune diseases or cancer may be susceptible.</li> <li>- <b>Patients with Hematologic Malignancies</b>: Such as leukemia or lymphoma, due to their compromised immune systems.</li> </ul>                |

### 2. \*\*Unexplained Chronic Liver Disease\*\*

- \*\*Unexplained Liver Enzyme Elevations\*\*: Patients presenting with persistently elevated liver enzymes without a clear cause should be evaluated for hepatitis E.
- \*\*Chronic Hepatitis Symptoms\*\*: Symptoms like fatigue, jaundice, and hepatomegaly that persist for more than 6 months should prompt consideration of hepatitis E.

### 3. \*\*Geographic and Epidemiological Factors\*\*

- \*\*Regions with High HEV Endemicity\*\*: Patients residing in or traveling to areas with a high prevalence of hepatitis E, such as parts of Asia, Africa, and Mexico.
- \*\*Exposure to Contaminated Water or Food\*\*: Individuals who may have ingested contaminated water or undercooked meat, especially pork or deer, which can harbor HEV.

### 4. \*\*Specific Laboratory and Clinical Findings\*\*

- \*\*HEV RNA Detection\*\*: Persistent detection of HEV RNA in the blood or stool for more than 3 months is indicative of chronic infection.
- \*\*Liver Biopsy Findings\*\*: Liver biopsies showing chronic hepatitis with fibrosis or cirrhosis in the absence of other causes.

### 5. \*\*Recurrent or Prolonged Symptoms\*\*

- \*\*Persistent Symptoms Post-Acute Infection\*\*: Individuals with ongoing or relapsing symptoms after an acute hepatitis E episode.
- \*\*Extrahepatic Manifestations\*\*: Chronic cases may present with neurological symptoms like Guillain-Barré syndrome or renal symptoms such as glomerulonephritis.

### 6. \*\*Lack of Response to Treatment for Other Liver Diseases\*\*

- \*\*Unresponsive to Other Therapies\*\*: Patients not responding to treatment for other suspected liver diseases should



|                                                                                          |                                                                                                                                                                                                                                                                                                                                                                                                                                                                                                                                                                                                                                                                                                                                                                                                                                                                                                                                                                                                                                                                                          |
|------------------------------------------------------------------------------------------|------------------------------------------------------------------------------------------------------------------------------------------------------------------------------------------------------------------------------------------------------------------------------------------------------------------------------------------------------------------------------------------------------------------------------------------------------------------------------------------------------------------------------------------------------------------------------------------------------------------------------------------------------------------------------------------------------------------------------------------------------------------------------------------------------------------------------------------------------------------------------------------------------------------------------------------------------------------------------------------------------------------------------------------------------------------------------------------|
|                                                                                          | <p>be tested for chronic hepatitis E to rule it out.</p> <p>### Diagnostic Approach</p> <ul style="list-style-type: none"> <li>- <b>Serological Testing</b>: Testing for anti-HEV IgM and IgG antibodies.</li> <li>- <b>Molecular Testing</b>: PCR for HEV RNA in serum or stool to confirm chronic infection.</li> <li>- <b>Liver Function Tests</b>: Persistent abnormal liver function tests without another clear etiology.</li> </ul> <p>### Management</p> <ul style="list-style-type: none"> <li>- <b>Reduction of Immunosuppression</b>: In transplant patients, reducing immunosuppressive therapy may help clear the virus.</li> <li>- <b>Antiviral Therapy</b>: In some cases, antiviral treatments like ribavirin may be used.</li> </ul> <p>Considering chronic hepatitis E in these scenarios is crucial for timely diagnosis and management, which can significantly improve patient outcomes, particularly in vulnerable populations.</p> <p>Would you like more details on a specific aspect of chronic hepatitis E, such as diagnostic tests or treatment options?</p> |
| 20. Does a positive hepatitis A virus antibody test definitely mean one has hepatitis A? | <p>A positive hepatitis A virus (HAV) antibody test, specifically for IgM antibodies, typically indicates a recent or acute hepatitis A infection. However, a positive result for IgG antibodies indicates past exposure or immunity due to previous infection or vaccination. Here's a breakdown:</p> <p>1. <b>IgM Antibody</b>:</p> <ul style="list-style-type: none"> <li>- <b>Positive Result</b>: This usually suggests an acute or recent infection with hepatitis A virus. IgM antibodies appear early in the course of infection and can indicate an active infection.</li> <li>- <b>Implication</b>: A positive IgM test often means that the person has an active hepatitis A infection, but clinical correlation with symptoms and possibly additional testing is necessary to confirm.</li> </ul>                                                                                                                                                                                                                                                                            |

|                                                                                          |                                                                                                                                                                                                                                                                                                                                                                                                                                                                                                                                                                                                                                                                                                                                                                                                                                                                                                                                                                                                                      |
|------------------------------------------------------------------------------------------|----------------------------------------------------------------------------------------------------------------------------------------------------------------------------------------------------------------------------------------------------------------------------------------------------------------------------------------------------------------------------------------------------------------------------------------------------------------------------------------------------------------------------------------------------------------------------------------------------------------------------------------------------------------------------------------------------------------------------------------------------------------------------------------------------------------------------------------------------------------------------------------------------------------------------------------------------------------------------------------------------------------------|
|                                                                                          | <p>2. <b>IgG Antibody</b>:</p> <ul style="list-style-type: none"> <li>- <b>Positive Result</b>: This indicates past exposure to hepatitis A or immunity, either from a previous infection or from vaccination. IgG antibodies remain in the body long-term.</li> <li>- <b>Implication</b>: A positive IgG test does not mean the person currently has hepatitis A. It shows that they have been exposed in the past and have developed immunity.</li> </ul> <p>Therefore, a positive hepatitis A virus antibody test does not always mean that one currently has hepatitis A. The type of antibody detected (IgM or IgG) and the clinical context are crucial for determining the meaning of the test result.</p> <p>Would you like more detailed information on interpreting these test results or related aspects of hepatitis A?</p>                                                                                                                                                                              |
| 21. Does a positive hepatitis C virus antibody test definitely mean one has hepatitis C? | <p>A positive hepatitis C virus (HCV) antibody test indicates that a person has been exposed to the virus at some point in their life, but it does not necessarily mean that they currently have an active hepatitis C infection. Here's a detailed explanation:</p> <p>### What a Positive HCV Antibody Test Means</p> <ul style="list-style-type: none"> <li>- <b>Exposure</b>: A positive HCV antibody test means that the person's immune system has been exposed to the hepatitis C virus and has developed antibodies against it.</li> <li>- <b>Past or Current Infection</b>: It indicates past or current infection but cannot differentiate between an active infection and a past infection that has resolved.</li> </ul> <p>### Need for Further Testing</p> <p>To determine if someone currently has an active hepatitis C infection, additional testing is required:</p> <p>1. <b>HCV RNA Test (PCR Test)</b>: This test detects the presence of the virus's genetic material (RNA) in the blood. A</p> |

|                                                                                                                                       |                                                                                                                                                                                                                                                                                                                                                                                                                                                                                                                                                                                                                                                                                                                                                                                                                                                                                                                                                                                                                                                                                                                                                                                    |
|---------------------------------------------------------------------------------------------------------------------------------------|------------------------------------------------------------------------------------------------------------------------------------------------------------------------------------------------------------------------------------------------------------------------------------------------------------------------------------------------------------------------------------------------------------------------------------------------------------------------------------------------------------------------------------------------------------------------------------------------------------------------------------------------------------------------------------------------------------------------------------------------------------------------------------------------------------------------------------------------------------------------------------------------------------------------------------------------------------------------------------------------------------------------------------------------------------------------------------------------------------------------------------------------------------------------------------|
|                                                                                                                                       | <p>positive result indicates an active infection.</p> <p>2. <b>HCV Viral Load Test</b>: This test measures the amount of virus in the blood, which helps in assessing the severity of the infection and monitoring treatment response.</p> <p><b>### Interpretation of Results</b></p> <ul style="list-style-type: none"> <li>- <b>Positive Antibody + Positive RNA</b>: Indicates an active hepatitis C infection.</li> <li>- <b>Positive Antibody + Negative RNA</b>: Indicates a past infection that has resolved or was cleared by the immune system.</li> </ul> <p><b>### Key Points</b></p> <ul style="list-style-type: none"> <li>- <b>Chronic vs. Acute Infection</b>: Some people who are exposed to HCV can clear the virus on their own (acute infection), while others may develop a chronic infection.</li> <li>- <b>Importance of Follow-Up</b>: A positive HCV antibody test requires follow-up testing to confirm current infection and guide further management or treatment.</li> </ul> <p>In summary, a positive hepatitis C antibody test suggests exposure to the virus but further testing is necessary to confirm whether there is an active infection.</p> |
| 22. How should the results of the "hepatitis B panel" be interpreted? What does it mean if the hepatitis B core antibody is positive? | <p>The results of a hepatitis B panel help determine if someone is currently infected with the hepatitis B virus (HBV), has been infected in the past, or has been vaccinated against the virus. The panel typically includes several tests, each with specific interpretations:</p> <p><b>### Hepatitis B Panel Components and Interpretations</b></p> <ol style="list-style-type: none"> <li>1. <b>Hepatitis B Surface Antigen (HBsAg)</b>:</li> </ol>                                                                                                                                                                                                                                                                                                                                                                                                                                                                                                                                                                                                                                                                                                                           |

- **Positive:** Indicates an active HBV infection. The person is infectious.
- **Negative:** No current HBV infection.

2. **Hepatitis B Surface Antibody (anti-HBs):**

- **Positive:** Indicates immunity to HBV, either from vaccination or from recovery from a past infection.
- **Negative:** No immunity to HBV.

3. **Hepatitis B Core Antibody (anti-HBc):**

- **Positive:** Suggests past or ongoing infection with HBV. It appears after an acute infection and remains positive indefinitely.
- **Negative:** No past or current HBV infection.

4. **Hepatitis B e Antigen (HBeAg):**

- **Positive:** Indicates active viral replication and high infectivity.
- **Negative:** Suggests lower levels of viral replication and lower infectivity.

5. **Hepatitis B e Antibody (anti-HBe):**

- **Positive:** Indicates lower levels of viral replication and may suggest a transition to a less infectious state.
- **Negative:** Higher levels of viral replication and higher infectivity, typically if HBeAg is positive.

**### Interpretation of Positive Hepatitis B Core Antibody (anti-HBc):**

A positive anti-HBc indicates that the person has been exposed to HBV at some point in their life. Here are some scenarios based on different combinations of test results:

1. **HBsAg Positive, anti-HBc Positive, anti-HBs Negative:**

- Indicates a current HBV infection (chronic or acute).

2. **\*\*HBsAg Negative, anti-HBc Positive, anti-HBs Positive:\*\***

- Indicates immunity due to a past infection. The individual has recovered from a previous HBV infection.

3. **\*\*HBsAg Negative, anti-HBc Positive, anti-HBs Negative:\*\***

- Indicates a resolved infection with a potential "window period" where the person may not show surface antibodies but has core antibodies. It might also suggest a false positive or a low-level chronic infection. Additional tests such as HBV DNA may be needed to clarify the situation.

4. **\*\*HBsAg Negative, anti-HBc Negative, anti-HBs Positive:\*\***

- Indicates immunity due to vaccination. No past or current infection.

5. **\*\*HBsAg Negative, anti-HBc Positive, anti-HBe Positive:\*\***

- Indicates a resolved past infection, potentially with lower infectivity if it was chronic.

**### Clinical Implications of Positive Anti-HBc:**

- **\*\*Past Infection:\*\*** Most commonly, a positive anti-HBc indicates past exposure to HBV and the presence of immunity from natural infection.

- **\*\*Chronic Infection:\*\*** If HBsAg is also positive, the individual has a chronic HBV infection.

- **\*\*"Window Period":** During acute infection, there might be a phase where HBsAg has cleared, and anti-HBs has not yet appeared. This is the window period, where anti-HBc may be the only positive marker.

- **\*\*False Positive:\*\*** Rarely, the anti-HBc may be positive in the absence of any other markers, which could suggest a false-positive result or a remote past infection.

|                                                                                        |                                                                                                                                                                                                                                                                                                                                                                                                                                                                                                                                                                                                                                                                                                                                                                                                                                                                                                                                                                                                                                                                                                                                                                                                                                                                                                                                                                                                                                                                                                                                    |
|----------------------------------------------------------------------------------------|------------------------------------------------------------------------------------------------------------------------------------------------------------------------------------------------------------------------------------------------------------------------------------------------------------------------------------------------------------------------------------------------------------------------------------------------------------------------------------------------------------------------------------------------------------------------------------------------------------------------------------------------------------------------------------------------------------------------------------------------------------------------------------------------------------------------------------------------------------------------------------------------------------------------------------------------------------------------------------------------------------------------------------------------------------------------------------------------------------------------------------------------------------------------------------------------------------------------------------------------------------------------------------------------------------------------------------------------------------------------------------------------------------------------------------------------------------------------------------------------------------------------------------|
|                                                                                        | <p>For a thorough evaluation, the results should be interpreted in the context of the patient's clinical history and other laboratory findings. Further testing and consultation with a healthcare provider or specialist in infectious diseases or hepatology may be warranted to confirm the diagnosis and plan appropriate management.</p> <p>Feel free to ask if you need more details or have any specific scenarios to discuss!</p>                                                                                                                                                                                                                                                                                                                                                                                                                                                                                                                                                                                                                                                                                                                                                                                                                                                                                                                                                                                                                                                                                          |
| 23. Under what circumstances should screening for hepatitis C antibodies be performed? | <p>Screening for hepatitis C antibodies (anti-HCV) is crucial in identifying individuals with hepatitis C virus (HCV) infection. The following circumstances warrant screening:</p> <p>### **1. Born Between 1945 and 1965 (Baby Boomers)**</p> <ul style="list-style-type: none"> <li>- <b>Rationale</b>: Higher prevalence of HCV in this age group, likely due to past exposures such as blood transfusions before HCV testing was available.</li> </ul> <p>### **2. Current or Past Injection Drug Use</p> <ul style="list-style-type: none"> <li>- <b>Rationale</b>: Sharing needles or other drug paraphernalia can transmit HCV.</li> </ul> <p>### **3. Blood Transfusion or Organ Transplant Before 1992</p> <ul style="list-style-type: none"> <li>- <b>Rationale</b>: Screening for HCV in blood donations began in 1992 in many countries.</li> </ul> <p>### **4. Received Clotting Factor Concentrates Before 1987</p> <ul style="list-style-type: none"> <li>- <b>Rationale</b>: Factor concentrates were not heat-treated to kill HCV before this time.</li> </ul> <p>### **5. Chronic Hemodialysis</p> <ul style="list-style-type: none"> <li>- <b>Rationale</b>: Increased risk of HCV due to potential exposure to contaminated equipment and blood.</li> </ul> <p>### **6. Healthcare, Emergency Medical, and Public Safety Workers</p> <ul style="list-style-type: none"> <li>- <b>Rationale</b>: Risk of exposure to HCV-infected blood, especially after needlestick injuries or mucosal exposure.</li> </ul> |

### \*\*7. Children Born to HCV-Infected Mothers\*\*

- \*\*Rationale\*\*: Vertical transmission from mother to child is a known risk factor.

### \*\*8. Known Exposure to HCV\*\*

- \*\*Rationale\*\*: Such as from needlestick injuries, contact with infected blood, or sexual partners with HCV.

### \*\*9. HIV Infection\*\*

- \*\*Rationale\*\*: Coinfection with HIV and HCV is common due to shared transmission routes.

### \*\*10. Unexplained Elevated Liver Enzymes\*\*

- \*\*Rationale\*\*: Persistent abnormal liver function tests (e.g., ALT, AST) can indicate underlying HCV infection.

### \*\*11. History of Incarceration\*\*

- \*\*Rationale\*\*: Higher prevalence of HCV in incarcerated populations due to high-risk behaviors.

### \*\*12. History of Long-term Hemodialysis\*\*

- \*\*Rationale\*\*: Increased risk of HCV due to prolonged exposure to potential blood contamination.

### \*\*13. Persons Who Received Body Piercings or Tattoos in Non-regulated Settings\*\*

- \*\*Rationale\*\*: Risk of HCV transmission through non-sterile equipment.

### \*\*14. Persons with Symptoms or Signs of Liver Disease\*\*

- \*\*Rationale\*\*: Symptoms such as jaundice, hepatomegaly, or cirrhosis warrant testing for HCV.

### \*\*15. Prior Recipients of HCV-positive Blood Products\*\*

- **Rationale**: Even if the donor was identified retrospectively, recipients should be tested.

**16. Persons with History of Sexually Transmitted Infections (STIs)**

- **Rationale**: Certain STIs indicate behaviors that increase risk of HCV transmission.

**17. Persons with Multiple Sexual Partners**

- **Rationale**: Although less common, sexual transmission can occur, particularly among those with multiple partners.

**18. Migrants from Regions with High HCV Prevalence**

- **Rationale**: Increased likelihood of having been exposed to HCV in endemic areas.

**19. Routine Screening Recommendations**

- **Rationale**: Some guidelines recommend one-time screening for all adults aged 18-79 regardless of risk factors due to the potential benefits of early detection and treatment.

**20. Pre-treatment Evaluation for Other Infections**

- **Rationale**: Screening may be considered for patients being evaluated for other treatments that might affect liver function or immune response.

**21. Patients Undergoing Chemotherapy or Immunosuppressive Therapy**

- **Rationale**: Potential for reactivation of latent HCV infection during immunosuppression.

**22. Patients With Unexplained Fatigue or Other Systemic Symptoms**

- **Rationale**: HCV can present with non-specific symptoms like fatigue, requiring screening to determine underlying cause.



|                                                                        |                                                                                                                                                                                                                                                                                                                                                                                                                                                                                                                                                                                                                                                                                                                                                                                                                                                                                                                                                                                    |
|------------------------------------------------------------------------|------------------------------------------------------------------------------------------------------------------------------------------------------------------------------------------------------------------------------------------------------------------------------------------------------------------------------------------------------------------------------------------------------------------------------------------------------------------------------------------------------------------------------------------------------------------------------------------------------------------------------------------------------------------------------------------------------------------------------------------------------------------------------------------------------------------------------------------------------------------------------------------------------------------------------------------------------------------------------------|
|                                                                        | <p>### **23. Men Who Have Sex with Men (MSM)**</p> <ul style="list-style-type: none"> <li>- **Rationale**: Increased risk due to potential blood-to-blood contact and other factors in some cases.</li> </ul> <p>### **24. Recipients of Blood Products or Organs from Donors with High-Risk Factors**</p> <ul style="list-style-type: none"> <li>- **Rationale**: Higher likelihood of HCV transmission even with current screening practices.</li> </ul> <p>### **Conclusion**</p> <p>Screening for HCV antibodies is essential for early detection and management, reducing the risk of liver disease progression and transmission to others. It's particularly recommended for individuals in high-risk categories, those with potential exposures, and as part of routine health assessments in certain populations.</p> <p>If you have any specific scenarios or further questions, feel free to ask!</p>                                                                    |
| 24. Under what circumstances should chronic hepatitis E be considered? | <p>Chronic hepatitis E should be considered in certain specific circumstances, particularly when dealing with individuals who have a weakened immune system or are immunocompromised. Here are some situations where chronic hepatitis E might be considered:</p> <p>### 1. **Immunocompromised Individuals**</p> <ul style="list-style-type: none"> <li>- **Solid Organ Transplant Recipients**: Patients who have undergone organ transplants and are on immunosuppressive therapy are at a higher risk.</li> <li>- **HIV/AIDS Patients**: Individuals with HIV, particularly those with low CD4 counts, are more susceptible to chronic hepatitis E.</li> <li>- **Cancer Patients**: Those receiving chemotherapy or other immunosuppressive treatments.</li> <li>- **Patients on Long-term Steroids**: Those with autoimmune diseases or other conditions requiring long-term immunosuppressive therapy.</li> </ul> <p>### 2. **Persistent Abnormal Liver Function Tests**</p> |

- **\*\*Unexplained Elevated Liver Enzymes\*\***: If liver function tests (e.g., ALT, AST) remain elevated for more than six months without a clear cause.
- **\*\*Chronic Liver Disease Symptoms\*\***: Signs such as jaundice, fatigue, or hepatomegaly without an obvious etiology.

#### ### 3. **\*\*Unusual Geographical or Epidemiological Risk\*\***

- **\*\*Endemic Regions\*\***: Individuals who have lived in or traveled to regions where hepatitis E is endemic (e.g., parts of Asia, Africa, and Central America).
- **\*\*Exposure to Contaminated Water or Food\*\***: Those with a history of exposure to potentially contaminated sources.

#### ### 4. **\*\*Unexplained Hepatitis in Immunocompromised Patients\*\***

- **\*\*Negative for Common Hepatitis Viruses\*\***: Patients who test negative for hepatitis A, B, C, and D but have persistent hepatitis symptoms.

#### ### 5. **\*\*Patients with Chronic Infections or Co-infections\*\***

- **\*\*Co-infections\*\***: Patients with other chronic infections that compromise the immune system, making them more susceptible to chronic hepatitis E.

#### ### 6. **\*\*Recurrent or Unexplained Hepatitis Episodes\*\***

- **\*\*Recurrent Hepatitis\*\***: Patients who experience recurrent episodes of hepatitis that do not resolve with standard treatment.
- **\*\*Prolonged Viremia\*\***: Persistent hepatitis E virus (HEV) RNA in the blood, especially in those who do not clear the virus within the typical 6-month period.

#### ### 7. **\*\*Pregnant Women (Rare but Possible)\*\***

|                                                                      |                                                                                                                                                                                                                                                                                                                                                                                                                                                                                                                                                                                                                                                                                                                                                                                                                                                                                                                                                                                                                                                                                                                                                                                                                                                                                                                                                    |
|----------------------------------------------------------------------|----------------------------------------------------------------------------------------------------------------------------------------------------------------------------------------------------------------------------------------------------------------------------------------------------------------------------------------------------------------------------------------------------------------------------------------------------------------------------------------------------------------------------------------------------------------------------------------------------------------------------------------------------------------------------------------------------------------------------------------------------------------------------------------------------------------------------------------------------------------------------------------------------------------------------------------------------------------------------------------------------------------------------------------------------------------------------------------------------------------------------------------------------------------------------------------------------------------------------------------------------------------------------------------------------------------------------------------------------|
|                                                                      | <ul style="list-style-type: none"> <li>- <b>Complications in Pregnancy</b>: Though rare, pregnant women, especially in the third trimester, can develop severe complications from hepatitis E, leading to considerations of chronicity in some cases.</li> </ul> <p><b>### Clinical Evaluation and Testing</b></p> <ul style="list-style-type: none"> <li>- <b>HEV RNA Testing</b>: Chronic hepatitis E is confirmed by the detection of HEV RNA in the blood or stool for more than six months.</li> <li>- <b>Liver Biopsy</b>: In some cases, a liver biopsy may be indicated to assess the extent of liver damage and to differentiate from other causes of chronic liver disease.</li> </ul> <p><b>### Management Considerations</b></p> <ul style="list-style-type: none"> <li>- <b>Reduction of Immunosuppressive Therapy</b>: In some patients, reducing the dose of immunosuppressive drugs can help in clearing the virus.</li> <li>- <b>Antiviral Therapy</b>: Ribavirin has been used in some cases to treat chronic hepatitis E in immunocompromised patients, although its use requires careful monitoring due to potential side effects.</li> </ul> <p>Recognizing these factors can aid in the early identification and management of chronic hepatitis E, which is crucial for preventing progression to severe liver disease.</p> |
| <p>25. What tests can definitively diagnose chronic hepatitis E?</p> | <p>Diagnosing chronic hepatitis E (HEV) can be challenging, but several specific tests can provide a definitive diagnosis. Here are the primary tests used:</p> <p><b>### 1. HEV RNA Detection</b></p> <ul style="list-style-type: none"> <li>- <b>Polymerase Chain Reaction (PCR)</b> <ul style="list-style-type: none"> <li>- This is the gold standard for diagnosing chronic hepatitis E. PCR can detect the presence of HEV RNA in blood or stool samples.</li> <li>- It is highly sensitive and specific, allowing for the confirmation of ongoing HEV infection.</li> </ul> </li> </ul>                                                                                                                                                                                                                                                                                                                                                                                                                                                                                                                                                                                                                                                                                                                                                     |

### ### \*\*2. Serological Tests\*\*

#### - \*\*Anti-HEV IgM and IgG Antibodies\*\*

- \*\*IgM antibodies\*\* indicate recent or acute infection but may also be present in chronic cases, especially if there is ongoing liver damage.

- \*\*IgG antibodies\*\* suggest past exposure, but their presence alone cannot distinguish between past and current infection. They are more useful for epidemiological studies.

### ### \*\*3. Liver Function Tests (LFTs)\*\*

- While not definitive on their own, elevated liver enzymes (e.g., ALT, AST) may indicate ongoing liver inflammation or damage and prompt further investigation for HEV infection.

### ### \*\*4. Liver Biopsy\*\*

- In some cases, a liver biopsy may be performed to assess the extent of liver damage and rule out other causes of chronic hepatitis. It can show characteristic histological changes consistent with HEV infection.

### ### \*\*5. Genotyping\*\*

- Genotyping of the virus can provide additional information about the strain and potential sources of infection. It is particularly useful for epidemiological tracking.

### ### \*\*6. Exclusion of Other Causes\*\*

- Testing for other common causes of hepatitis (e.g., hepatitis A, B, C, D) is essential to rule out co-infections or other primary causes of liver disease.

### ### \*\*Key Points for Diagnosis\*\*

- \*\*Chronic HEV infection\*\* is typically defined as the presence of HEV RNA in blood or stool for more than six months.

- \*\*Immunocompromised individuals\*\* (e.g., organ transplant recipients, patients on immunosuppressive therapy) are at

|                                                                                 |                                                                                                                                                                                                                                                                                                                                                                                                                                                                                                                                                                                                                                                                                                                                                                                                                                                                                                                                                                                                                                                                                                                                                                                                                                                                                                                                                                                                                  |
|---------------------------------------------------------------------------------|------------------------------------------------------------------------------------------------------------------------------------------------------------------------------------------------------------------------------------------------------------------------------------------------------------------------------------------------------------------------------------------------------------------------------------------------------------------------------------------------------------------------------------------------------------------------------------------------------------------------------------------------------------------------------------------------------------------------------------------------------------------------------------------------------------------------------------------------------------------------------------------------------------------------------------------------------------------------------------------------------------------------------------------------------------------------------------------------------------------------------------------------------------------------------------------------------------------------------------------------------------------------------------------------------------------------------------------------------------------------------------------------------------------|
|                                                                                 | <p>higher risk for developing chronic HEV infection.</p> <p>If you have further questions or need clarification on any specific test, feel free to ask!</p>                                                                                                                                                                                                                                                                                                                                                                                                                                                                                                                                                                                                                                                                                                                                                                                                                                                                                                                                                                                                                                                                                                                                                                                                                                                      |
| <b>Topic: Prevention and Treatment</b>                                          |                                                                                                                                                                                                                                                                                                                                                                                                                                                                                                                                                                                                                                                                                                                                                                                                                                                                                                                                                                                                                                                                                                                                                                                                                                                                                                                                                                                                                  |
| 26. If someone in the family has viral hepatitis, how should others prevent it? | <p>If someone in the family has viral hepatitis, it's important for other family members to take certain precautions to prevent the spread of the virus. The specific preventive measures can vary depending on the type of viral hepatitis (A, B, C, D, or E), but here are general guidelines that apply to all types:</p> <p>### General Precautions</p> <ol style="list-style-type: none"> <li><b>Good Hygiene Practices</b>: <ul style="list-style-type: none"> <li><b>Hand Washing</b>: Regularly wash hands with soap and water, especially after using the bathroom, changing diapers, and before eating or preparing food.</li> <li><b>Sanitize Surfaces</b>: Disinfect surfaces that may be contaminated with blood or bodily fluids.</li> </ul> </li> <li><b>Avoid Sharing Personal Items</b>: <ul style="list-style-type: none"> <li>Do not share toothbrushes, razors, nail clippers, or other personal items that could be contaminated with blood or body fluids.</li> <li>Avoid sharing needles, syringes, or other drug paraphernalia.</li> </ul> </li> <li><b>Safe Handling of Blood and Body Fluids</b>: <ul style="list-style-type: none"> <li>Wear gloves when handling items or cleaning areas that may have blood or body fluids.</li> <li>Dispose of blood-contaminated items safely, using sealed containers if possible.</li> </ul> </li> </ol> <p>### Specific to Hepatitis Types</p> |

#### #### Hepatitis A and E

- **Transmission**: Mainly through ingestion of contaminated food or water.
- **Prevention**:
  - Ensure safe drinking water.
  - Maintain good personal hygiene.
  - Cook food thoroughly and wash fruits and vegetables.
  - Avoid eating raw or undercooked shellfish.

#### #### Hepatitis B, C, and D

- **Transmission**: Primarily through contact with infected blood or bodily fluids.
- **Prevention**:
  - **Vaccination**: Hepatitis B vaccine is available and recommended for all family members. There is no vaccine for hepatitis C or D.
  - **Safe Sex Practices**: Use condoms to reduce the risk of transmission through sexual contact.
  - **Avoid Blood Contact**: Be cautious with medical procedures, tattoos, and piercings. Ensure needles are sterile.

#### ### For Pregnant Women

- **Hepatitis B**: Pregnant women should get tested for hepatitis B. If positive, measures should be taken to prevent transmission to the newborn, including vaccination and immunoglobulin administration at birth.

#### ### Regular Screening and Monitoring

- Family members should consider getting tested if they are at risk or suspect exposure. Regular medical check-ups and monitoring can help detect hepatitis early and manage any health issues promptly.

#### ### Educate and Inform

- **Education**: Inform all family members about the modes of transmission and prevention measures.

|                                          |                                                                                                                                                                                                                                                                                                                                                                                                                                                                                                                                                                                                                                                                                                                                                                                                                                                                                                                                                                                                                                                                                                                                                                                                                                                                                                                                            |
|------------------------------------------|--------------------------------------------------------------------------------------------------------------------------------------------------------------------------------------------------------------------------------------------------------------------------------------------------------------------------------------------------------------------------------------------------------------------------------------------------------------------------------------------------------------------------------------------------------------------------------------------------------------------------------------------------------------------------------------------------------------------------------------------------------------------------------------------------------------------------------------------------------------------------------------------------------------------------------------------------------------------------------------------------------------------------------------------------------------------------------------------------------------------------------------------------------------------------------------------------------------------------------------------------------------------------------------------------------------------------------------------|
|                                          | <p>- <b>Communicate</b>: Discuss any concerns with healthcare providers to get personalized advice and recommendations.</p> <p>By following these guidelines, family members can significantly reduce the risk of contracting and spreading viral hepatitis.</p>                                                                                                                                                                                                                                                                                                                                                                                                                                                                                                                                                                                                                                                                                                                                                                                                                                                                                                                                                                                                                                                                           |
| 27. What harm can viral hepatitis cause? | <p>Viral hepatitis can have a range of harmful effects on the body, primarily targeting the liver but potentially affecting other organs and systems. Here are some of the major harms caused by different types of viral hepatitis:</p> <p>### 1. <b>Liver Damage</b></p> <ul style="list-style-type: none"> <li>- <b>Acute Hepatitis</b>: Rapid liver inflammation and damage. Symptoms may include jaundice, fatigue, and abdominal pain.</li> <li>- <b>Chronic Hepatitis</b>: Persistent inflammation can lead to long-term liver damage.</li> </ul> <p>### 2. <b>Cirrhosis</b></p> <ul style="list-style-type: none"> <li>- <b>Liver Scarring</b>: Chronic hepatitis (especially hepatitis B and C) can cause fibrosis (scarring) of the liver tissue, eventually leading to cirrhosis.</li> <li>- <b>Impaired Liver Function</b>: Cirrhosis impairs the liver's ability to function, affecting metabolism, detoxification, and production of vital proteins.</li> </ul> <p>### 3. <b>Liver Failure</b></p> <ul style="list-style-type: none"> <li>- <b>Acute Liver Failure</b>: Severe and sudden liver damage, which can be life-threatening.</li> <li>- <b>Chronic Liver Failure</b>: Progressive deterioration of liver function due to long-term damage.</li> </ul> <p>### 4. <b>Hepatocellular Carcinoma (Liver Cancer)</b></p> |

- **Increased Risk**: Chronic hepatitis B and C significantly increase the risk of developing liver cancer.
- **Cancer Development**: Persistent inflammation and liver cell turnover contribute to carcinogenesis.

#### ### 5. **Portal Hypertension**

- **Increased Blood Pressure in the Portal Vein**: Cirrhosis and liver damage can obstruct blood flow through the liver, leading to increased pressure in the portal vein.
- **Complications**: This can cause varices (enlarged veins), which are prone to bleeding, and ascites (fluid accumulation in the abdomen).

#### ### 6. **Systemic Effects**

- **Immune System Involvement**: Chronic hepatitis can affect the immune system, leading to autoimmune reactions and systemic inflammation.
- **Extrahepatic Manifestations**: Viral hepatitis can affect other organs, causing conditions like glomerulonephritis (kidney inflammation), cryoglobulinemia (immune complex deposition), and arthritis.

#### ### 7. **Metabolic Dysregulation**

- **Lipid Metabolism**: Hepatitis C, in particular, can disrupt lipid metabolism, leading to steatosis (fatty liver).
- **Insulin Resistance**: Chronic hepatitis C is associated with insulin resistance and an increased risk of diabetes.

#### ### 8. **Mental and Physical Fatigue**

- **Chronic Fatigue**: Persistent infection can cause chronic fatigue, significantly impacting the quality of life.



|                                                                                                                                                                       |                                                                                                                                                                                                                                                                                                                                                                                                                                                                                                                                                                                                                                                                                                                                                                                                                                                                                                                                                                                                                                                                                                                                                                                                                                                                                                                                                                                                                                                                |
|-----------------------------------------------------------------------------------------------------------------------------------------------------------------------|----------------------------------------------------------------------------------------------------------------------------------------------------------------------------------------------------------------------------------------------------------------------------------------------------------------------------------------------------------------------------------------------------------------------------------------------------------------------------------------------------------------------------------------------------------------------------------------------------------------------------------------------------------------------------------------------------------------------------------------------------------------------------------------------------------------------------------------------------------------------------------------------------------------------------------------------------------------------------------------------------------------------------------------------------------------------------------------------------------------------------------------------------------------------------------------------------------------------------------------------------------------------------------------------------------------------------------------------------------------------------------------------------------------------------------------------------------------|
|                                                                                                                                                                       | <p>- <b>Depression and Anxiety</b>: The psychological impact of chronic illness and the burden of symptoms can lead to mental health issues.</p> <p>### 9. <b>Increased Mortality</b></p> <p>- <b>Higher Death Rates</b>: Complications from viral hepatitis, such as liver failure and cancer, contribute to increased mortality rates.</p> <p>### Specific Types of Viral Hepatitis</p> <ul style="list-style-type: none"> <li>- <b>Hepatitis A</b>: Usually causes acute, self-limiting liver disease, but can lead to acute liver failure in rare cases.</li> <li>- <b>Hepatitis B</b>: Can cause both acute and chronic liver disease, with a high risk of cirrhosis and liver cancer.</li> <li>- <b>Hepatitis C</b>: Often leads to chronic infection, which can result in significant liver damage, cirrhosis, and cancer.</li> <li>- <b>Hepatitis D</b>: Requires hepatitis B infection for replication; co-infection can lead to more severe liver disease.</li> <li>- <b>Hepatitis E</b>: Usually causes acute hepatitis, but can be severe in pregnant women and those with weakened immune systems.</li> </ul> <p>### Conclusion</p> <p>The impact of viral hepatitis varies depending on the type of virus, duration of infection, and individual factors such as immune response and presence of comorbidities. Early detection and appropriate treatment are crucial to mitigate these harmful effects and prevent long-term complications.</p> |
| 28. If a family member has hepatitis B, how often should others check for hepatitis B surface antibodies? Under what circumstances should vaccinations be considered? | <p>If a family member has hepatitis B, it's essential for other family members to be vigilant about their health and take preventive measures to avoid contracting the virus. Here's a guide on how often others should check for hepatitis B surface antibodies and under what circumstances vaccinations should be considered:</p>                                                                                                                                                                                                                                                                                                                                                                                                                                                                                                                                                                                                                                                                                                                                                                                                                                                                                                                                                                                                                                                                                                                           |

### ### \*\*Checking for Hepatitis B Surface Antibodies (Anti-HBs)\*\*

#### 1. \*\*Initial Screening\*\*:

- Family members should initially get screened for hepatitis B surface antibodies (Anti-HBs) to determine their immunity status. This is crucial for understanding if they have been exposed to the virus or if they are already immune.

#### 2. \*\*Frequency of Monitoring\*\*:

- \*\*Unvaccinated Individuals or Those with Uncertain Immunity\*\*:
- If a family member has not been vaccinated or if their vaccination status is unclear, it is advisable to check for anti-HBs initially and then once every 6-12 months, especially if there is ongoing exposure to the infected person (e.g., through living together).
- \*\*Vaccinated Individuals\*\*:
- If a family member has been vaccinated and shows positive anti-HBs (indicating immunity), routine monitoring is generally not necessary unless there is a significant change in exposure risk or new health conditions arise that may affect immunity.

#### 3. \*\*Special Circumstances\*\*:

- \*\*Exposure to Blood or Bodily Fluids\*\*:
- If a family member has had an exposure incident, such as a needle stick or contact with infected blood, they should get tested immediately and again after 1-3 months.
- \*\*Pregnancy\*\*:
- Pregnant women with a family history of hepatitis B should get screened during pregnancy.

### ### \*\*Consideration for Vaccination\*\*

#### 1. \*\*Unvaccinated Family Members\*\*:

- \*\*Immediate Family Living Together\*\*:
- Family members living with someone who has hepatitis B should get vaccinated if they are not already. This is crucial because hepatitis B can spread through household contact.
- \*\*Close Contacts\*\*:
- Even if not living together, close contacts such as partners and caregivers should also be vaccinated.

2. **At Risk for Infection**:

- **Healthcare Workers**: Family members who work in healthcare or other environments where they might be exposed to blood or bodily fluids should be vaccinated.
- **Children and Adolescents**: They should be vaccinated as per the routine immunization schedule, especially if living in a household with an infected individual.

3. **People with High-Risk Behaviors**:

- **Intravenous Drug Users**: Family members with high-risk behaviors such as intravenous drug use should be vaccinated.
- **Multiple Sexual Partners**: Those with multiple sexual partners should also consider vaccination.

4. **Travel to Endemic Areas**:

- If any family members plan to travel to areas with high rates of hepatitis B, they should get vaccinated before traveling.

5. **Re-vaccination and Booster Doses**:

- **Non-Responders**: Some people may not respond to the initial vaccination series. They may need additional doses or alternative vaccination strategies.
- **Booster Shots**: Generally, boosters are not required for healthy individuals with initial adequate response. However, people with compromised immune systems may need periodic re-evaluation and possibly boosters.

### **Conclusion**

Regular monitoring and vaccination are key components of preventing hepatitis B transmission within a household where a family member is infected. Family members should consult healthcare providers to establish a monitoring and

|                                                                        |                                                                                                                                                                                                                                                                                                                                                                                                                                                                                                                                                                                                                                                                                                                                                                                                                                                                                                                                                                                                                                                                                                                                                                                                                                                                                                                                                                                                                                             |
|------------------------------------------------------------------------|---------------------------------------------------------------------------------------------------------------------------------------------------------------------------------------------------------------------------------------------------------------------------------------------------------------------------------------------------------------------------------------------------------------------------------------------------------------------------------------------------------------------------------------------------------------------------------------------------------------------------------------------------------------------------------------------------------------------------------------------------------------------------------------------------------------------------------------------------------------------------------------------------------------------------------------------------------------------------------------------------------------------------------------------------------------------------------------------------------------------------------------------------------------------------------------------------------------------------------------------------------------------------------------------------------------------------------------------------------------------------------------------------------------------------------------------|
|                                                                        | <p>vaccination plan that fits their specific circumstances.</p> <p>For further personalized guidance, family members should discuss their individual situations with a healthcare provider.</p>                                                                                                                                                                                                                                                                                                                                                                                                                                                                                                                                                                                                                                                                                                                                                                                                                                                                                                                                                                                                                                                                                                                                                                                                                                             |
| 29. If I have viral hepatitis, what dietary precautions should I take? | <p>For individuals with viral hepatitis, maintaining a healthy diet is crucial to support liver function and overall health. Here are some dietary precautions and recommendations to consider:</p> <p>### General Dietary Guidelines</p> <ol style="list-style-type: none"> <li><b>Balanced Diet</b>: <ul style="list-style-type: none"> <li>Include a variety of fruits, vegetables, whole grains, lean proteins, and healthy fats.</li> <li>Avoid processed foods, excessive fats, and sugary snacks which can stress the liver.</li> </ul> </li> <li><b>Adequate Hydration</b>: <ul style="list-style-type: none"> <li>Drink plenty of water to help the liver flush out toxins.</li> <li>Avoid or limit caffeinated and sugary beverages.</li> </ul> </li> <li><b>Limit Alcohol Intake</b>: <ul style="list-style-type: none"> <li>Avoid alcohol entirely as it can exacerbate liver damage and interfere with recovery.</li> </ul> </li> <li><b>Moderate Protein Intake</b>: <ul style="list-style-type: none"> <li>Include lean protein sources like chicken, fish, legumes, and tofu.</li> <li>Avoid excessive red meat and processed meats which can be harder for the liver to process.</li> </ul> </li> <li><b>Healthy Fats</b>: <ul style="list-style-type: none"> <li>Opt for sources like avocados, nuts, seeds, and olive oil.</li> <li>Limit saturated and trans fats found in fried and fast foods.</li> </ul> </li> </ol> |

6. **\*\*Low Sodium\*\***:

- Reduce salt intake to avoid fluid retention and swelling.
- Choose fresh foods over canned or processed items.

7. **\*\*Avoid Raw or Undercooked Shellfish\*\***:

- These can carry viruses and bacteria that can further harm the liver.

### Specific Nutritional Considerations

1. **\*\*Vitamin and Mineral Support\*\***:

- Ensure adequate intake of vitamins A, D, E, and K, as well as minerals like zinc and selenium. However, avoid megadoses, particularly of vitamin A and D, which can be toxic to the liver.

2. **\*\*Avoid High Iron and Copper Foods\*\***:

- Excessive iron and copper can accumulate in the liver and worsen liver damage. Be cautious with red meats and shellfish.

3. **\*\*Antioxidant-Rich Foods\*\***:

- Fruits and vegetables high in antioxidants can help reduce liver inflammation. Berries, leafy greens, and citrus fruits are good choices.

4. **\*\*Complex Carbohydrates\*\***:

- Choose whole grains like oats, brown rice, and quinoa for sustained energy levels and to avoid blood sugar spikes.

### Specific Foods to Consider

1. **Garlic**: Known for its detoxifying properties.
2. **Green Tea**: Rich in antioxidants, but should be consumed in moderation.
3. **Beetroot**: Contains compounds that may help reduce oxidative stress and inflammation in the liver.
4. **Turmeric**: Has anti-inflammatory properties and may support liver health.

#### ### Foods to Avoid

1. **High-Sugar Foods**: Such as candies, pastries, and sugary drinks.
2. **High-Fat Foods**: Especially fried foods and those containing trans fats.
3. **Raw Seafood**: Particularly oysters and other shellfish.
4. **Processed Foods**: These often contain additives and preservatives that can burden the liver.

#### ### Lifestyle Modifications

1. **Regular, Small Meals**:
  - Eating smaller, more frequent meals can help manage blood sugar levels and reduce liver strain.
2. **Weight Management**:
  - Maintaining a healthy weight can reduce fat buildup in the liver and improve overall liver function.
3. **Physical Activity**:
  - Engage in regular moderate exercise to enhance liver function and overall health.

#### ### Medical Consultation

|                                                                               |                                                                                                                                                                                                                                                                                                                                                                                                                                                                                                                                                                                                                                                                                                                                                                                                                                                                                                                                                                                                                                                                                                                                                                                                                                                                                                                                                                                                                                                                                                                                                                          |
|-------------------------------------------------------------------------------|--------------------------------------------------------------------------------------------------------------------------------------------------------------------------------------------------------------------------------------------------------------------------------------------------------------------------------------------------------------------------------------------------------------------------------------------------------------------------------------------------------------------------------------------------------------------------------------------------------------------------------------------------------------------------------------------------------------------------------------------------------------------------------------------------------------------------------------------------------------------------------------------------------------------------------------------------------------------------------------------------------------------------------------------------------------------------------------------------------------------------------------------------------------------------------------------------------------------------------------------------------------------------------------------------------------------------------------------------------------------------------------------------------------------------------------------------------------------------------------------------------------------------------------------------------------------------|
|                                                                               | <p>- Always consult with a healthcare provider or a dietitian to tailor dietary recommendations to your specific condition and needs.</p> <p>If you have any other specific dietary concerns or need tailored advice, please let me know!</p>                                                                                                                                                                                                                                                                                                                                                                                                                                                                                                                                                                                                                                                                                                                                                                                                                                                                                                                                                                                                                                                                                                                                                                                                                                                                                                                            |
| 30. I have chronic hepatitis B; what should I pay attention to in daily life? | <p>Living with chronic hepatitis B requires careful management to maintain liver health and prevent complications. Here are key aspects to pay attention to in daily life:</p> <p>### 1. <b>Regular Medical Follow-ups</b></p> <ul style="list-style-type: none"> <li>- <b>Consult Your Doctor Regularly:</b> Regular liver function tests and viral load assessments are essential to monitor the disease's progression.</li> <li>- <b>Vaccination:</b> Ensure you are vaccinated against hepatitis A and get vaccinated annually against influenza.</li> </ul> <p>### 2. <b>Medications and Treatments</b></p> <ul style="list-style-type: none"> <li>- <b>Antiviral Medication:</b> Take prescribed antiviral medication consistently to reduce the viral load and prevent liver damage.</li> <li>- <b>Avoid Over-the-Counter Medications Without Doctor's Approval:</b> Some medications, such as acetaminophen, can harm the liver if taken inappropriately.</li> </ul> <p>### 3. <b>Healthy Lifestyle Choices</b></p> <ul style="list-style-type: none"> <li>- <b>Diet:</b> <ul style="list-style-type: none"> <li>- Eat a balanced diet rich in fruits, vegetables, and whole grains.</li> <li>- Limit intake of fatty, sugary, and salty foods.</li> <li>- Avoid raw or undercooked shellfish which can harbor bacteria harmful to the liver.</li> </ul> </li> <li>- <b>Hydration:</b> Drink plenty of water to support overall liver function.</li> <li>- <b>Avoid Alcohol:</b> Alcohol can accelerate liver damage in individuals with hepatitis B.</li> </ul> |

#### ### 4. \*\*Exercise and Weight Management\*\*

- \*\*Regular Exercise:\*\* Aim for at least 30 minutes of moderate exercise most days to maintain a healthy weight and reduce liver fat.
- \*\*Weight Management:\*\* Obesity can lead to fatty liver disease, which can compound liver issues.

#### ### 5. \*\*Preventing Disease Transmission\*\*

- \*\*Practice Safe Sex:\*\* Use condoms to prevent the spread of the virus to sexual partners.
- \*\*Avoid Sharing Needles or Personal Items:\*\* Do not share needles, razors, or toothbrushes to prevent the spread of the virus.
- \*\*Household Precautions:\*\* Ensure household members are vaccinated against hepatitis B.

#### ### 6. \*\*Mental Health and Support\*\*

- \*\*Seek Support:\*\* Join support groups or seek counseling to manage the emotional aspects of living with a chronic illness.
- \*\*Stress Management:\*\* Practice stress-relief techniques like meditation, yoga, or deep breathing exercises.

#### ### 7. \*\*Monitoring for Complications\*\*

- \*\*Watch for Symptoms:\*\* Be vigilant for symptoms of liver damage such as jaundice, fatigue, abdominal pain, and dark urine.
- \*\*Liver Cancer Screening:\*\* Regularly screen for liver cancer, as chronic hepatitis B increases the risk.

#### ### 8. \*\*Travel Considerations\*\*

- \*\*Travel Safely:\*\* Ensure you have access to medical care when traveling and take precautions to avoid infections that could affect the liver.

#### ### 9. \*\*Educate Yourself\*\*



|                                                                                                               |                                                                                                                                                                                                                                                                                                                                                                                                                                                                                                                                                                                                                                                                                                                                                                                                                                                                                                                                                                                                                                          |
|---------------------------------------------------------------------------------------------------------------|------------------------------------------------------------------------------------------------------------------------------------------------------------------------------------------------------------------------------------------------------------------------------------------------------------------------------------------------------------------------------------------------------------------------------------------------------------------------------------------------------------------------------------------------------------------------------------------------------------------------------------------------------------------------------------------------------------------------------------------------------------------------------------------------------------------------------------------------------------------------------------------------------------------------------------------------------------------------------------------------------------------------------------------|
|                                                                                                               | <p>- <b>Stay Informed:</b> Keep up-to-date with the latest information on hepatitis B management and treatment options.</p> <p>### 10. <b>Avoid Liver Toxins</b></p> <p>- <b>Limit Exposure to Chemicals:</b> Avoid exposure to environmental toxins and chemicals that can stress the liver.</p> <p>Adhering to these guidelines can help you manage chronic hepatitis B effectively and maintain your quality of life. Always discuss any new symptoms or concerns with your healthcare provider.</p> <p>Would you like more detailed information on any specific aspect of managing chronic hepatitis B?</p>                                                                                                                                                                                                                                                                                                                                                                                                                          |
| 31. I have chronic hepatitis B and it's controlled with medication; what indicators should I regularly check? | <p>As someone with chronic hepatitis B under medication, it's crucial to regularly monitor several key indicators to assess liver health and ensure effective management of the condition. Here's a list of the important indicators to check regularly:</p> <p>### 1. <b>Hepatitis B Viral Load (HBV DNA)</b></p> <p>- <b>Why:</b> Measures the amount of hepatitis B virus in your blood.</p> <p>- <b>Frequency:</b> Every 3-6 months initially, then as recommended by your healthcare provider.</p> <p>- <b>Purpose:</b> Helps to monitor the effectiveness of antiviral treatment.</p> <p>### 2. <b>Liver Function Tests (LFTs)</b></p> <p>- <b>Key Components:</b> Alanine aminotransferase (ALT), Aspartate aminotransferase (AST), Alkaline phosphatase (ALP), Bilirubin.</p> <p>- <b>Why:</b> Assesses liver damage and function.</p> <p>- <b>Frequency:</b> Every 3-6 months.</p> <p>- <b>Purpose:</b> Elevated levels can indicate liver inflammation or damage.</p> <p>### 3. <b>Hepatitis B Surface Antigen (HBsAg)</b></p> |

- **Why:** Indicates the presence of hepatitis B virus.
- **Frequency:** Annually or as directed.
- **Purpose:** Persistence suggests chronic infection; loss indicates possible resolution.

#### ### **4. Hepatitis B e Antigen (HBeAg) and Antibody (Anti-HBe)**

- **Why:** Helps assess the phase of infection and infectiousness.
- **Frequency:** Every 6-12 months.
- **Purpose:** Loss of HBeAg and development of anti-HBe can indicate a lower risk of liver damage.

#### ### **5. Hepatitis B Surface Antibody (Anti-HBs)**

- **Why:** Indicates immunity to hepatitis B.
- **Frequency:** Periodically, especially after vaccination or if HBsAg becomes negative.
- **Purpose:** Confirms immunity or response to vaccination.

#### ### **6. Alpha-Fetoprotein (AFP)**

- **Why:** Screening for liver cancer (hepatocellular carcinoma).
- **Frequency:** Every 6 months.
- **Purpose:** Elevated levels can be a marker for liver cancer.

#### ### **7. Liver Ultrasound or Fibroscan**

- **Why:** Imaging tests to assess liver fibrosis or cirrhosis.
- **Frequency:** Every 6-12 months.
- **Purpose:** Detects liver changes and assesses the risk of liver cancer.

#### ### **8. Complete Blood Count (CBC)**

- **Why:** Evaluates overall health and checks for anemia, infection, or other abnormalities.

- **Frequency:** Every 6-12 months or as directed.
- **Purpose:** Monitors for potential complications related to liver disease.

#### ### **9. Kidney Function Tests**

- **Key Components:** Serum creatinine, blood urea nitrogen (BUN).
- **Why:** Monitors kidney health, especially if taking antiviral medications that can affect kidney function.
- **Frequency:** Every 6-12 months.
- **Purpose:** Ensures kidney function remains normal while on medication.

#### ### **10. Coagulation Profile**

- **Key Components:** Prothrombin time (PT), International normalized ratio (INR).
- **Why:** Assesses blood clotting function.
- **Frequency:** Every 6-12 months.
- **Purpose:** Liver disease can affect blood clotting, leading to increased bleeding risk.

#### ### **Lifestyle and Additional Monitoring**

- **Diet and Exercise:** Maintain a healthy diet and regular exercise to support liver health.
- **Alcohol Avoidance:** Completely avoid alcohol to reduce liver stress.
- **Medication Adherence:** Strictly follow prescribed medication regimens to control the infection effectively.

#### ### **Regular Follow-ups**

- **Why:** Continuous monitoring by your healthcare provider is essential.
- **Frequency:** Follow your healthcare provider's recommendations for follow-up visits and testing schedules.

By regularly monitoring these indicators, you can effectively manage chronic hepatitis B, minimize complications, and maintain overall liver health. Always consult with your healthcare provider for personalized advice and to adjust your

|                                                                                                                                 |                                                                                                                                                                                                                                                                                                                                                                                                                                                                                                                                                                                                                                                                                                                                                                                                                                                                                                                                                                                                                                                                                                                                                                                                                                                                                                                                                                                                                                                                                                                                                                                                                                                                           |
|---------------------------------------------------------------------------------------------------------------------------------|---------------------------------------------------------------------------------------------------------------------------------------------------------------------------------------------------------------------------------------------------------------------------------------------------------------------------------------------------------------------------------------------------------------------------------------------------------------------------------------------------------------------------------------------------------------------------------------------------------------------------------------------------------------------------------------------------------------------------------------------------------------------------------------------------------------------------------------------------------------------------------------------------------------------------------------------------------------------------------------------------------------------------------------------------------------------------------------------------------------------------------------------------------------------------------------------------------------------------------------------------------------------------------------------------------------------------------------------------------------------------------------------------------------------------------------------------------------------------------------------------------------------------------------------------------------------------------------------------------------------------------------------------------------------------|
|                                                                                                                                 | <p>monitoring schedule based on your specific condition.</p> <p>If you have specific questions or need further details on any of these indicators, feel free to ask!</p>                                                                                                                                                                                                                                                                                                                                                                                                                                                                                                                                                                                                                                                                                                                                                                                                                                                                                                                                                                                                                                                                                                                                                                                                                                                                                                                                                                                                                                                                                                  |
| <p>32. I have chronic hepatitis B and it's controlled with medication; how often should I visit the hospital for follow-up?</p> | <p>For individuals with chronic hepatitis B, regular follow-ups are crucial to monitor the disease, assess liver function, and ensure the effectiveness of treatment. Here's a typical follow-up schedule for a patient with controlled chronic hepatitis B on medication:</p> <p>### Follow-Up Schedule</p> <ol style="list-style-type: none"> <li><b>Every 3-6 Months:</b> <ul style="list-style-type: none"> <li><b>Liver Function Tests:</b> To check for any signs of liver damage or inflammation.</li> <li><b>HBV DNA Levels:</b> To monitor the viral load and ensure the medication is effectively controlling the virus.</li> <li><b>Alpha-Fetoprotein (AFP) Test:</b> To screen for liver cancer, as chronic hepatitis B increases the risk.</li> <li><b>HBeAg and anti-HBe Tests:</b> To monitor the state of viral replication and progression of the disease.</li> </ul> </li> <li><b>Every 6-12 Months:</b> <ul style="list-style-type: none"> <li><b>Ultrasound or Liver Imaging:</b> To screen for hepatocellular carcinoma (HCC), especially if you have cirrhosis or are at higher risk.</li> <li><b>Hepatitis B Surface Antigen (HBsAg) Test:</b> To check for any changes in infection status.</li> </ul> </li> <li><b>Annual Comprehensive Review:</b> <ul style="list-style-type: none"> <li><b>Thorough Assessment:</b> Including a review of treatment adherence, potential side effects, and overall health.</li> <li><b>Fibrosis Assessment:</b> If not already done, to check for liver stiffness or fibrosis, which may involve transient elastography or other non-invasive tests.</li> </ul> </li> </ol> <p>### Special Considerations</p> |

|                                                                  |                                                                                                                                                                                                                                                                                                                                                                                                                                                                                                                                                                                                                                                                                                                                                                                                                                                                                                                                                                                                                                                                                                                                                                                                                                                                                                                                                                                                             |
|------------------------------------------------------------------|-------------------------------------------------------------------------------------------------------------------------------------------------------------------------------------------------------------------------------------------------------------------------------------------------------------------------------------------------------------------------------------------------------------------------------------------------------------------------------------------------------------------------------------------------------------------------------------------------------------------------------------------------------------------------------------------------------------------------------------------------------------------------------------------------------------------------------------------------------------------------------------------------------------------------------------------------------------------------------------------------------------------------------------------------------------------------------------------------------------------------------------------------------------------------------------------------------------------------------------------------------------------------------------------------------------------------------------------------------------------------------------------------------------|
|                                                                  | <p>- <b>**Liver Biopsy or FibroScan**</b>: May be recommended less frequently to assess liver fibrosis or cirrhosis, especially if there are changes in liver function tests or symptoms.</p> <p>- <b>**Adjustment of Medication**</b>: Your doctor may adjust your treatment plan based on the results of your tests, any new symptoms, or changes in your health.</p> <p>### Importance of Regular Follow-Ups</p> <p>Regular monitoring helps in early detection of complications such as liver cirrhosis or liver cancer, ensures that the medication continues to be effective, and allows for timely interventions if necessary. It's also essential to maintain communication with your healthcare provider regarding any new symptoms or side effects from the medication.</p> <p>### Individualized Care</p> <p>The frequency of follow-ups may vary based on individual factors such as age, liver disease severity, family history of liver cancer, and overall health. Always follow the specific recommendations of your healthcare provider.</p> <p>It's advisable to keep a detailed record of all your appointments, test results, and any changes in your condition or treatment.</p> <p>If you have any specific concerns or symptoms, it's important to contact your healthcare provider promptly.</p> <p>If you have more questions or need further clarification, feel free to ask!</p> |
| 33. What are the common antiviral drugs for chronic hepatitis B? | <p>For the treatment of chronic hepatitis B (CHB), a variety of antiviral drugs are commonly used. These medications aim to suppress viral replication, reduce liver inflammation, and prevent complications such as cirrhosis and hepatocellular carcinoma. Here are the primary antiviral drugs used for chronic hepatitis B:</p>                                                                                                                                                                                                                                                                                                                                                                                                                                                                                                                                                                                                                                                                                                                                                                                                                                                                                                                                                                                                                                                                         |

### ### 1. \*\*Nucleoside/Nucleotide Analogues (NAs)\*\*

These drugs inhibit the viral DNA polymerase, which is essential for HBV replication.

- \*\*Entecavir (Baraclude)\*\*: A potent antiviral that is effective in both treatment-naïve and treatment-experienced patients. It has a high barrier to resistance.
- \*\*Tenofovir disoproxil fumarate (Viread)\*\*: Highly effective in suppressing HBV and is often used as a first-line treatment. It also has a high barrier to resistance.
- \*\*Tenofovir alafenamide (Vemlidy)\*\*: A newer formulation of tenofovir that is equally effective but has fewer side effects, particularly on the kidneys and bones.
- \*\*Lamivudine (Epivir-HBV)\*\*: One of the first antivirals used for CHB. It is less commonly used now due to the high rate of resistance development.
- \*\*Telbivudine (Tyzeka)\*\*: Similar to lamivudine but with a slightly higher rate of viral suppression. It also has a higher risk of resistance.
- \*\*Adefovir dipivoxil (Hepsera)\*\*: Effective but less potent than tenofovir and entecavir. It is sometimes used in combination with other drugs to prevent resistance.

### ### 2. \*\*Interferon-based Therapy\*\*

Interferons are immune system proteins that help to control viral infections.

- \*\*Pegylated interferon-alpha (Pegasys)\*\*: This is a longer-acting form of interferon that is injected weekly. It works by

|                                                                                                                                    |                                                                                                                                                                                                                                                                                                                                                                                                                                                                                                                                                                                                                                                                                                                                                                                                                                                                                                                                                                                                                                                                                                                                                                                                                                                                                                                           |
|------------------------------------------------------------------------------------------------------------------------------------|---------------------------------------------------------------------------------------------------------------------------------------------------------------------------------------------------------------------------------------------------------------------------------------------------------------------------------------------------------------------------------------------------------------------------------------------------------------------------------------------------------------------------------------------------------------------------------------------------------------------------------------------------------------------------------------------------------------------------------------------------------------------------------------------------------------------------------------------------------------------------------------------------------------------------------------------------------------------------------------------------------------------------------------------------------------------------------------------------------------------------------------------------------------------------------------------------------------------------------------------------------------------------------------------------------------------------|
|                                                                                                                                    | <p>stimulating the immune system to attack the virus and can lead to a sustained virological response, although it has significant side effects and is less well-tolerated than nucleoside/nucleotide analogues.</p> <p>### Factors Influencing Drug Choice</p> <ul style="list-style-type: none"> <li>- <b>HBV Genotype</b>: Different HBV genotypes may respond differently to treatment.</li> <li>- <b>Baseline Viral Load</b>: Higher viral loads may require more potent antiviral drugs.</li> <li>- <b>Presence of Liver Damage</b>: Patients with significant liver damage may need more aggressive treatment.</li> <li>- <b>Patient's Medical History</b>: Including any history of antiviral resistance or co-infections (e.g., HIV).</li> <li>- <b>Potential Side Effects</b>: Such as renal toxicity or bone density loss, which are particularly relevant for drugs like tenofovir.</li> <li>- <b>Treatment Duration</b>: Some patients may require long-term or even lifelong therapy.</li> </ul> <p>### Monitoring and Resistance</p> <p>Regular monitoring of viral load and liver function tests is essential to assess the effectiveness of treatment and detect any emerging drug resistance.</p> <p>Would you like more detailed information on any specific antiviral drug or treatment strategy?</p> |
| 34. I have chronic hepatitis B and am using long-acting interferon treatment; what are the side effects of long-acting interferon? | <p>Long-acting interferon, often referred to as pegylated interferon, is commonly used in the treatment of chronic hepatitis B. While it can be effective in managing the condition, it also comes with a range of potential side effects. Here are some common and less common side effects:</p>                                                                                                                                                                                                                                                                                                                                                                                                                                                                                                                                                                                                                                                                                                                                                                                                                                                                                                                                                                                                                         |

### Common Side Effects:

1. \*\*Flu-like Symptoms\*\*:

- Fever
- Chills
- Muscle aches
- Fatigue

2. \*\*Gastrointestinal Issues\*\*:

- Nausea
- Vomiting
- Diarrhea
- Loss of appetite

3. \*\*Fatigue\*\*:

- General tiredness and weakness which may persist throughout the treatment.

4. \*\*Weight Loss\*\*:

- Due to decreased appetite and gastrointestinal symptoms.

5. \*\*Psychiatric Symptoms\*\*:

- Depression
- Irritability
- Anxiety
- Sleep disturbances



6. **\*\*Hematological Effects\*\***:

- Decreased white blood cell count (leukopenia)
- Decreased red blood cell count (anemia)
- Decreased platelet count (thrombocytopenia)

7. **\*\*Hair Thinning\*\***:

- Hair loss or thinning, typically reversible after treatment ends.

8. **\*\*Injection Site Reactions\*\***:

- Redness, swelling, or pain at the site of injection.

### Less Common Side Effects:

1. **\*\*Thyroid Dysfunction\*\***:

- Hypothyroidism or hyperthyroidism, leading to weight changes, temperature sensitivity, and energy level fluctuations.

2. **\*\*Autoimmune Disorders\*\***:

- New or worsening autoimmune conditions, such as lupus or rheumatoid arthritis.

3. **\*\*Cardiovascular Issues\*\***:

- Elevated blood pressure
- Heart palpitations
- Rarely, heart attack or stroke

4. **\*\*Pulmonary Effects\*\***:

- Cough
- Shortness of breath
- Interstitial lung disease in rare cases

5. **Ophthalmologic Effects**:

- Vision changes or eye irritation

6. **Hepatic Effects**:

- Potential worsening of liver function tests
- Rarely, liver decompensation in patients with advanced liver disease

7. **Neurological Symptoms**:

- Headaches
- Dizziness
- Rarely, seizures or neuropathy

8. **Infections**:

- Increased risk of infections due to lowered immune system response.

9. **Metabolic Changes**:

- Changes in glucose levels, potentially leading to diabetes in susceptible individuals.

10. **Dermatologic Reactions**:

- Skin rashes or itching

**Monitoring and Management:**

|                                                                                                                                                                                                           |                                                                                                                                                                                                                                                                                                                                                                                                                                                                                                                                                                                                                                                                                                                                                                                                                                                                                                                                                                                                                                                                                                                                                                                                                                                                   |
|-----------------------------------------------------------------------------------------------------------------------------------------------------------------------------------------------------------|-------------------------------------------------------------------------------------------------------------------------------------------------------------------------------------------------------------------------------------------------------------------------------------------------------------------------------------------------------------------------------------------------------------------------------------------------------------------------------------------------------------------------------------------------------------------------------------------------------------------------------------------------------------------------------------------------------------------------------------------------------------------------------------------------------------------------------------------------------------------------------------------------------------------------------------------------------------------------------------------------------------------------------------------------------------------------------------------------------------------------------------------------------------------------------------------------------------------------------------------------------------------|
|                                                                                                                                                                                                           | <ul style="list-style-type: none"> <li>- <b>Regular Monitoring</b>: Regular blood tests to monitor liver function, blood cell counts, and thyroid function are crucial during treatment.</li> <li>- <b>Symptom Management</b>: Medications to manage side effects like nausea or depression might be prescribed.</li> <li>- <b>Support</b>: Psychological support or counseling might be helpful for managing mood changes.</li> </ul> <p>### Precautions:</p> <ul style="list-style-type: none"> <li>- <b>Avoid Certain Medications</b>: Some drugs may interact with interferon, worsening side effects or reducing effectiveness.</li> <li>- <b>Lifestyle Modifications</b>: Maintaining a healthy diet and staying hydrated can help manage some side effects.</li> </ul> <p>### Consult Your Doctor:</p> <p>Always report any new or worsening symptoms to your healthcare provider to ensure timely management and adjustment of your treatment plan if necessary. Your doctor can provide personalized advice and interventions to minimize side effects and improve your overall quality of life during treatment.</p> <p>If you have any specific concerns or need detailed information about managing a particular side effect, please let me know!</p> |
| <p>35. I have chronic hepatitis B and am using long-acting interferon treatment; what discomfort should I be aware of in my body? Under what circumstances should I seek immediate medical attention?</p> | <p>Chronic hepatitis B (CHB) and its treatment with long-acting interferon can lead to several potential discomforts and side effects. Here's a detailed overview of what you should be aware of and when to seek immediate medical attention.</p> <p>### Common Discomforts and Side Effects of Long-Acting Interferon Treatment</p> <ol style="list-style-type: none"> <li>1. <b>Flu-like Symptoms</b>:</li> </ol>                                                                                                                                                                                                                                                                                                                                                                                                                                                                                                                                                                                                                                                                                                                                                                                                                                              |

- **Symptoms**: Fever, chills, fatigue, muscle aches, headache.
- **Management**: These symptoms often appear after the injection and may subside within a few days. Over-the-counter pain relievers like acetaminophen or ibuprofen can help, but always consult your physician before taking any medication.

2. **Fatigue**:

- **Symptoms**: Persistent tiredness, lack of energy.
- **Management**: Ensure adequate rest, maintain a balanced diet, and stay hydrated. Light physical activity can also help manage fatigue.

3. **Depression and Mood Changes**:

- **Symptoms**: Feelings of sadness, anxiety, irritability.
- **Management**: It's crucial to monitor your mood and seek support from mental health professionals if needed. Inform your healthcare provider about any significant mood changes.

4. **Gastrointestinal Issues**:

- **Symptoms**: Nausea, vomiting, loss of appetite.
- **Management**: Eat small, frequent meals and avoid greasy or spicy foods. Staying hydrated is essential.

5. **Skin Reactions**:

- **Symptoms**: Injection site reactions such as redness, swelling, or itching; dry skin or rash.
- **Management**: Apply ice or a topical ointment to the injection site to reduce irritation. Use moisturizers to alleviate dry skin.

6. **Hair Thinning**:

- **Symptoms**: Mild hair loss or thinning.

- **Management**: This is typically temporary and resolves after treatment. Gentle hair care can minimize the impact.

7. **Weight Loss**:

- **Symptoms**: Unintended weight loss.
- **Management**: Monitor your weight and maintain a nutritious diet to support your body during treatment.

8. **Hematological Changes**:

- **Symptoms**: Anemia (low red blood cells), thrombocytopenia (low platelets), leukopenia (low white blood cells).
- **Management**: Regular blood tests are crucial to monitor these changes. Consult your physician for appropriate interventions if significant changes occur.

### When to Seek Immediate Medical Attention

1. **Severe Allergic Reactions**:

- **Symptoms**: Difficulty breathing, swelling of the face, lips, tongue, or throat, severe rash.
- **Action**: Seek emergency medical help immediately.

2. **Severe Depression or Suicidal Thoughts**:

- **Symptoms**: Persistent feelings of hopelessness, thoughts of self-harm or suicide.
- **Action**: Contact your healthcare provider or emergency services immediately.

3. **Severe Abdominal Pain or Jaundice**:

- **Symptoms**: Intense pain in the abdomen, yellowing of the skin or eyes, dark urine, pale stools.
- **Action**: These could indicate liver complications, and you should seek urgent medical evaluation.

4. **\*\*Signs of Severe Infection\*\***:

- **\*\*Symptoms\*\***: High fever, chills, sore throat, persistent cough, unusual fatigue.
- **\*\*Action\*\***: These symptoms might indicate a serious infection requiring prompt treatment.

5. **\*\*Severe Chest Pain or Shortness of Breath\*\***:

- **\*\*Symptoms\*\***: Sudden, severe chest pain, shortness of breath, dizziness.
- **\*\*Action\*\***: These could be signs of a heart attack or other serious cardiovascular issues and require immediate medical attention.

6. **\*\*Severe Bleeding or Bruising\*\***:

- **\*\*Symptoms\*\***: Unexplained or excessive bleeding, easy bruising.
- **\*\*Action\*\***: This might indicate a blood clotting disorder or low platelet count. Seek medical advice immediately.

7. **\*\*Neurological Changes\*\***:

- **\*\*Symptoms\*\***: Severe headaches, vision changes, confusion, seizures, weakness in limbs.
- **\*\*Action\*\***: These could be signs of neurological complications and need urgent medical evaluation.

8. **\*\*Severe or Persistent Diarrhea\*\***:

- **\*\*Symptoms\*\***: Diarrhea that doesn't subside, severe abdominal cramps.
- **\*\*Action\*\***: This can lead to dehydration and requires medical attention.

### General Tips for Managing Your Condition

- **\*\*Regular Monitoring\*\***: Keep up with scheduled blood tests and medical appointments to monitor your liver function and overall health.
- **\*\*Healthy Lifestyle\*\***: Follow a healthy diet, avoid alcohol, and stay physically active to support your liver health.

|                                                                                                                         |                                                                                                                                                                                                                                                                                                                                                                                                                                                                                                                                                                                                                                                                                                                                                                                                                                                                                                                                                                                                                                                                                                                                                                                                                                                                                                                                                                                                                                                                                          |
|-------------------------------------------------------------------------------------------------------------------------|------------------------------------------------------------------------------------------------------------------------------------------------------------------------------------------------------------------------------------------------------------------------------------------------------------------------------------------------------------------------------------------------------------------------------------------------------------------------------------------------------------------------------------------------------------------------------------------------------------------------------------------------------------------------------------------------------------------------------------------------------------------------------------------------------------------------------------------------------------------------------------------------------------------------------------------------------------------------------------------------------------------------------------------------------------------------------------------------------------------------------------------------------------------------------------------------------------------------------------------------------------------------------------------------------------------------------------------------------------------------------------------------------------------------------------------------------------------------------------------|
|                                                                                                                         | <p>- <b>Support Network</b>: Engage with support groups or counseling services to help manage the emotional and psychological impacts of chronic hepatitis B and its treatment.</p> <p>Always communicate openly with your healthcare provider about any new or worsening symptoms to ensure prompt and appropriate care.</p> <p>If you have any specific concerns or need further details on managing your condition, feel free to ask.</p>                                                                                                                                                                                                                                                                                                                                                                                                                                                                                                                                                                                                                                                                                                                                                                                                                                                                                                                                                                                                                                             |
| 36. I have chronic hepatitis B and am using long-acting interferon treatment; what indicators should I regularly check? | <p>Chronic hepatitis B is a serious condition that requires careful monitoring, especially when undergoing treatment with long-acting interferon. Here are the key indicators you should regularly check:</p> <p><b>Liver Function Tests (LFTs)</b></p> <ol style="list-style-type: none"> <li><b>Alanine Aminotransferase (ALT)</b>: Elevated levels can indicate liver inflammation.</li> <li><b>Aspartate Aminotransferase (AST)</b>: Another enzyme that helps detect liver damage.</li> <li><b>Alkaline Phosphatase (ALP)</b>: High levels can indicate bile duct problems or liver damage.</li> <li><b>Gamma-glutamyl Transferase (GGT)</b>: Elevated levels may suggest liver or bile duct damage.</li> <li><b>Bilirubin</b>: High levels can indicate liver dysfunction and bile duct obstruction.</li> <li><b>Albumin</b>: Low levels can indicate poor liver function.</li> <li><b>Prothrombin Time (PT)</b>: Prolonged PT can suggest impaired liver function, affecting blood clotting.</li> </ol> <p><b>Hepatitis B Viral Markers</b></p> <ol style="list-style-type: none"> <li><b>Hepatitis B Surface Antigen (HBsAg)</b>: Indicates active HBV infection.</li> <li><b>Hepatitis B e Antigen (HBeAg)</b>: High levels suggest active viral replication and high infectivity.</li> <li><b>Hepatitis B Virus DNA (HBV DNA)</b>: Quantifies the amount of virus in the blood, indicating the level of viral replication.</li> </ol> <p><b>Complete Blood Count (CBC)</b></p> |

1. **White Blood Cell Count (WBC)**: Monitors for potential infections and overall immune status.
2. **Platelet Count**: Low levels can indicate liver damage or an increased risk of bleeding.
3. **Hemoglobin and Hematocrit**: Monitors overall blood health and potential anemia.

#### **Thyroid Function Tests**

Interferon therapy can affect thyroid function.

1. **Thyroid-Stimulating Hormone (TSH)**
2. **Free Thyroxine (T4)**

#### **Kidney Function Tests**

1. **Blood Urea Nitrogen (BUN)**
2. **Creatinine**: Monitors kidney function, which can be affected by interferon therapy.

#### **Alpha-Fetoprotein (AFP)**

- Elevated levels can indicate liver cancer risk, particularly important in chronic HBV patients.

#### **Serum Ammonia**

- Monitors for hepatic encephalopathy, a potential complication of severe liver disease.

#### **Blood Sugar Levels**

- Regular monitoring is important as liver dysfunction can affect glucose metabolism.

#### **Bone Density Scan (DEXA)**

- Long-term interferon therapy can affect bone density; regular checks can help monitor bone health.

#### **Physical Examination and Ultrasound**



|                                                                                      |                                                                                                                                                                                                                                                                                                                                                                                                                                                                                                                                                                                                                                                                                                                                                                                                                                                                                                                                                                                                                                                                                                                    |
|--------------------------------------------------------------------------------------|--------------------------------------------------------------------------------------------------------------------------------------------------------------------------------------------------------------------------------------------------------------------------------------------------------------------------------------------------------------------------------------------------------------------------------------------------------------------------------------------------------------------------------------------------------------------------------------------------------------------------------------------------------------------------------------------------------------------------------------------------------------------------------------------------------------------------------------------------------------------------------------------------------------------------------------------------------------------------------------------------------------------------------------------------------------------------------------------------------------------|
|                                                                                      | <p>1. <b>Liver Ultrasound</b>: To monitor liver size, structure, and any signs of cirrhosis or liver tumors.</p> <p>2. <b>Physical Examination</b>: Regular check-ups to assess overall health and look for signs of liver disease complications.</p> <p><b>### Patient-Specific Considerations</b></p> <ul style="list-style-type: none"> <li>- <b>Personal History and Symptoms</b>: Keep track of any new symptoms or changes in existing conditions.</li> <li>- <b>Family History</b>: Family history of liver disease or cancer can guide more frequent monitoring.</li> </ul> <p><b>### Follow-Up and Frequency</b></p> <ul style="list-style-type: none"> <li>- The frequency of these tests varies based on the stage of your hepatitis B, treatment progress, and overall health. Your healthcare provider will determine the appropriate schedule, typically every 3-6 months.</li> </ul> <p>It's important to work closely with your healthcare provider to develop a personalized monitoring plan that suits your specific needs and ensures the effective management of your chronic hepatitis B.</p> |
| 37. When taking anti-hepatitis B medication, what dietary precautions should I take? | <p>When taking anti-hepatitis B medication, it's important to consider dietary precautions to maximize the effectiveness of the medication and support liver health. Here are some general guidelines to follow:</p> <p><b>### 1. Avoid Alcohol</b></p> <ul style="list-style-type: none"> <li>- <b>Why</b>: Alcohol can worsen liver damage and reduce the effectiveness of hepatitis B treatment.</li> <li>- <b>Action</b>: Completely avoid or significantly limit alcohol consumption.</li> </ul> <p><b>### 2. Limit Processed and High-Fat Foods</b></p> <ul style="list-style-type: none"> <li>- <b>Why</b>: These can strain the liver and contribute to fatty liver disease.</li> <li>- <b>Action</b>: Choose fresh, whole foods over processed ones and opt for healthy fats like those found in avocados, nuts, and olive oil.</li> </ul>                                                                                                                                                                                                                                                                |

### 3. **Monitor Iron Intake:**

- **Why:** Excessive iron can accumulate in the liver and cause further damage.
- **Action:** Avoid iron supplements unless prescribed and be cautious with iron-rich foods.

### 4. **Eat a Balanced Diet:**

- **Why:** A well-balanced diet supports overall health and liver function.
- **Action:** Include a variety of fruits, vegetables, lean proteins, and whole grains.

### 5. **Stay Hydrated:**

- **Why:** Adequate hydration supports liver function and helps flush out toxins.
- **Action:** Drink plenty of water throughout the day.

### 6. **Limit Salt Intake:**

- **Why:** High sodium can lead to water retention and liver damage.
- **Action:** Use less salt in cooking and avoid high-sodium processed foods.

### 7. **Avoid Unnecessary Supplements:**

- **Why:** Some supplements can be harmful to the liver.
- **Action:** Only take supplements that are recommended by your healthcare provider.

### 8. **Be Cautious with Herbal Products:**

- **Why:** Some herbal supplements can interact with hepatitis B medications or harm the liver.
- **Action:** Discuss any herbal products with your doctor before use.

### 9. **Maintain a Healthy Weight:**

- **Why:** Being overweight can exacerbate liver disease.

|                                                                                                        |                                                                                                                                                                                                                                                                                                                                                                                                                                                                                                                                                                                                                                                                                                                                                                                                                                                                                                                                                                                                                                                                                                                                                                                                                                                                                                                   |
|--------------------------------------------------------------------------------------------------------|-------------------------------------------------------------------------------------------------------------------------------------------------------------------------------------------------------------------------------------------------------------------------------------------------------------------------------------------------------------------------------------------------------------------------------------------------------------------------------------------------------------------------------------------------------------------------------------------------------------------------------------------------------------------------------------------------------------------------------------------------------------------------------------------------------------------------------------------------------------------------------------------------------------------------------------------------------------------------------------------------------------------------------------------------------------------------------------------------------------------------------------------------------------------------------------------------------------------------------------------------------------------------------------------------------------------|
|                                                                                                        | <ul style="list-style-type: none"> <li>- <b>Action:</b> Follow a balanced diet and engage in regular physical activity to maintain a healthy weight.</li> </ul> <p>### 10. <b>Avoid Raw or Undercooked Seafood:</b></p> <ul style="list-style-type: none"> <li>- <b>Why:</b> These can contain bacteria and viruses that may be harmful to the liver.</li> <li>- <b>Action:</b> Ensure all seafood is thoroughly cooked.</li> </ul> <p>### 11. <b>Monitor for Medication Interactions:</b></p> <ul style="list-style-type: none"> <li>- <b>Why:</b> Some foods and medications can interact with anti-hepatitis B drugs.</li> <li>- <b>Action:</b> Follow your doctor's advice on food-drug interactions and avoid grapefruit if advised, as it can affect drug metabolism.</li> </ul> <p>### 12. <b>Regular Follow-up with Healthcare Provider:</b></p> <ul style="list-style-type: none"> <li>- <b>Why:</b> Ongoing monitoring helps manage liver health and treatment efficacy.</li> <li>- <b>Action:</b> Attend all scheduled medical appointments and follow your healthcare provider's dietary recommendations.</li> </ul> <p>These dietary precautions can help in managing hepatitis B effectively and supporting liver health. Always consult with your healthcare provider for personalized advice.</p> |
| 38. I have just been diagnosed with hepatitis B; under what circumstances should I consider treatment? | <p>Hepatitis B is a viral infection that can affect the liver, potentially leading to both acute and chronic disease. Deciding whether to start treatment depends on various factors, including the stage of the infection and specific clinical findings. Here are the key circumstances under which you should consider treatment for hepatitis B:</p> <p>### 1. <b>Chronic Hepatitis B with Elevated Liver Enzymes and Viral Load</b></p> <ul style="list-style-type: none"> <li>- <b>Elevated ALT/AST Levels:</b> Persistent elevation in liver enzymes, specifically alanine aminotransferase (ALT) and aspartate aminotransferase (AST), indicates ongoing liver inflammation.</li> <li>- <b>High HBV DNA Levels:</b> A high level of hepatitis B virus DNA in the blood suggests active viral replication.</li> </ul>                                                                                                                                                                                                                                                                                                                                                                                                                                                                                      |

#### ### 2. \*\*Evidence of Liver Damage\*\*

- \*\*Liver Biopsy Results:\*\* If a liver biopsy shows significant fibrosis or cirrhosis, treatment is typically recommended to prevent further liver damage.
- \*\*Non-Invasive Tests:\*\* Imaging studies like transient elastography (FibroScan) can indicate the degree of liver fibrosis.

#### ### 3. \*\*Presence of Cirrhosis or Advanced Liver Disease\*\*

- \*\*Compensated Cirrhosis:\*\* Treatment is recommended to reduce viral replication and prevent further liver damage.
- \*\*Decompensated Cirrhosis:\*\* Immediate treatment is critical to manage complications and reduce the risk of liver failure.

#### ### 4. \*\*High Risk of Transmission\*\*

- \*\*Pregnancy:\*\* Pregnant women with high viral loads should receive treatment to reduce the risk of transmitting the virus to the baby.
- \*\*Immunosuppressed Patients:\*\* Those undergoing chemotherapy or taking immunosuppressive drugs are at increased risk of reactivation and should consider treatment.

#### ### 5. \*\*Co-Infection with Other Viruses\*\*

- \*\*HIV or HCV Co-Infection:\*\* Individuals co-infected with HIV or hepatitis C virus (HCV) should consider treatment due to the increased risk of liver complications.

#### ### 6. \*\*Family History of Liver Cancer\*\*

- \*\*Hepatocellular Carcinoma Risk:\*\* A family history of liver cancer increases your risk, and treatment may reduce this risk by lowering viral activity.

|                                             |                                                                                                                                                                                                                                                                                                                                                                                                                                                                                                                                                                                                                                                                                                                                                                                                                                                                                                                                                                                                                                                                                                                                                                                                                                                                                                                                                                                                                                                                                                                                                                                                                                                                                                                                                                                                  |
|---------------------------------------------|--------------------------------------------------------------------------------------------------------------------------------------------------------------------------------------------------------------------------------------------------------------------------------------------------------------------------------------------------------------------------------------------------------------------------------------------------------------------------------------------------------------------------------------------------------------------------------------------------------------------------------------------------------------------------------------------------------------------------------------------------------------------------------------------------------------------------------------------------------------------------------------------------------------------------------------------------------------------------------------------------------------------------------------------------------------------------------------------------------------------------------------------------------------------------------------------------------------------------------------------------------------------------------------------------------------------------------------------------------------------------------------------------------------------------------------------------------------------------------------------------------------------------------------------------------------------------------------------------------------------------------------------------------------------------------------------------------------------------------------------------------------------------------------------------|
|                                             | <p>### 7. <b>**Presence of Extrahepatic Manifestations**</b></p> <ul style="list-style-type: none"> <li>- <b>**Conditions Like Polyarteritis Nodosa:**</b> Hepatitis B can cause complications outside the liver, such as vasculitis, which may warrant treatment.</li> </ul> <p>### 8. <b>**Severe Acute Hepatitis B**</b></p> <ul style="list-style-type: none"> <li>- <b>**Acute Liver Failure:**</b> If the infection is causing severe acute symptoms or liver failure, antiviral treatment might be necessary to manage the condition.</li> </ul> <p>### 9. <b>**Elevated Alpha-Fetoprotein (AFP) Levels**</b></p> <ul style="list-style-type: none"> <li>- <b>**Liver Cancer Screening:**</b> Regular monitoring of AFP levels and liver imaging may indicate the need for treatment if cancer is a concern.</li> </ul> <p>### Decision Factors</p> <ul style="list-style-type: none"> <li>- <b>**Age:**</b> Younger individuals with chronic hepatitis B are often monitored closely before starting treatment.</li> <li>- <b>**HBeAg Status:**</b> The presence of hepatitis B e antigen (HBeAg) and the pattern of seroconversion can influence treatment decisions.</li> <li>- <b>**Patient Preferences:**</b> Considering the side effects, costs, and lifestyle impacts of long-term antiviral therapy.</li> </ul> <p>### Conclusion</p> <p>Treatment for hepatitis B is not always immediate or necessary for all patients. It is crucial to have a thorough discussion with your healthcare provider to evaluate your specific situation, monitor your liver health regularly, and decide the best course of action based on your clinical profile and risk factors.</p> <p>Feel free to ask if you need more information or have specific concerns regarding your diagnosis.</p> |
| 39. I am a patient with chronic hepatitis B | For a patient with chronic hepatitis B undergoing initial treatment, regular check-ups are crucial to monitor the                                                                                                                                                                                                                                                                                                                                                                                                                                                                                                                                                                                                                                                                                                                                                                                                                                                                                                                                                                                                                                                                                                                                                                                                                                                                                                                                                                                                                                                                                                                                                                                                                                                                                |

|                                                                                                      |                                                                                                                                                                                                                                                                                                                                                                                                                                                                                                                                                                                                                                                                                                                                                                                                                                                                                                                                                                                                                                                                                                                                                                                                                                                                                                                                                                                                                                                                                                                                                                                                                                                                                                                                                                                                               |
|------------------------------------------------------------------------------------------------------|---------------------------------------------------------------------------------------------------------------------------------------------------------------------------------------------------------------------------------------------------------------------------------------------------------------------------------------------------------------------------------------------------------------------------------------------------------------------------------------------------------------------------------------------------------------------------------------------------------------------------------------------------------------------------------------------------------------------------------------------------------------------------------------------------------------------------------------------------------------------------------------------------------------------------------------------------------------------------------------------------------------------------------------------------------------------------------------------------------------------------------------------------------------------------------------------------------------------------------------------------------------------------------------------------------------------------------------------------------------------------------------------------------------------------------------------------------------------------------------------------------------------------------------------------------------------------------------------------------------------------------------------------------------------------------------------------------------------------------------------------------------------------------------------------------------|
| <p>undergoing initial treatment; how often should I have check-ups during the treatment process?</p> | <p>effectiveness of the treatment and to manage any potential side effects. The frequency of these check-ups typically depends on the specific treatment regimen and the patient's overall health status, but here are some general guidelines:</p> <p>### <b>**Initial Phase (First 3-6 Months)**</b></p> <p>- <b>**Monthly or Every 1-2 Months**</b>: During the initial phase of treatment, you might need more frequent check-ups. These appointments will typically involve blood tests to monitor liver function, hepatitis B viral load, and to check for potential side effects of the medication.</p> <p>### <b>**Maintenance Phase (After Initial 6 Months)**</b></p> <p>- <b>**Every 3-6 Months**</b>: Once your treatment is stabilized and if you are responding well, the frequency of visits may decrease to every 3-6 months. At these visits, your doctor will continue to monitor liver function tests, viral load, and assess for any long-term side effects or complications.</p> <p>### <b>**Annual Assessment**</b></p> <p>- <b>**Comprehensive Annual Review**</b>: Every year, a more thorough assessment might be necessary. This could include liver imaging (like ultrasound) and possibly a liver biopsy or fibroscan if indicated, to assess for liver damage or complications like liver cancer.</p> <p>### <b>**Factors Influencing Check-up Frequency**</b></p> <ol style="list-style-type: none"> <li>1. <b>**Type of Medication**</b>: Different antiviral drugs require different monitoring schedules.</li> <li>2. <b>**Liver Health**</b>: Patients with cirrhosis or significant liver damage may need more frequent monitoring.</li> <li>3. <b>**Co-infections**</b>: Presence of other infections like HIV or hepatitis C can affect monitoring schedules.</li> </ol> |
|------------------------------------------------------------------------------------------------------|---------------------------------------------------------------------------------------------------------------------------------------------------------------------------------------------------------------------------------------------------------------------------------------------------------------------------------------------------------------------------------------------------------------------------------------------------------------------------------------------------------------------------------------------------------------------------------------------------------------------------------------------------------------------------------------------------------------------------------------------------------------------------------------------------------------------------------------------------------------------------------------------------------------------------------------------------------------------------------------------------------------------------------------------------------------------------------------------------------------------------------------------------------------------------------------------------------------------------------------------------------------------------------------------------------------------------------------------------------------------------------------------------------------------------------------------------------------------------------------------------------------------------------------------------------------------------------------------------------------------------------------------------------------------------------------------------------------------------------------------------------------------------------------------------------------|

|                                                                                                                                     |                                                                                                                                                                                                                                                                                                                                                                                                                                                                                                                                                                                                                                                                                                                                                                                                                                                                                                                                                                                                                                                                                                                                                                                                                                                                                                                          |
|-------------------------------------------------------------------------------------------------------------------------------------|--------------------------------------------------------------------------------------------------------------------------------------------------------------------------------------------------------------------------------------------------------------------------------------------------------------------------------------------------------------------------------------------------------------------------------------------------------------------------------------------------------------------------------------------------------------------------------------------------------------------------------------------------------------------------------------------------------------------------------------------------------------------------------------------------------------------------------------------------------------------------------------------------------------------------------------------------------------------------------------------------------------------------------------------------------------------------------------------------------------------------------------------------------------------------------------------------------------------------------------------------------------------------------------------------------------------------|
|                                                                                                                                     | <p>4. <b>Response to Treatment</b>: If there are signs of treatment resistance or breakthrough infection, more frequent monitoring is necessary.</p> <p>### <b>Specific Tests and Monitoring</b></p> <ul style="list-style-type: none"> <li>- <b>Liver Function Tests (LFTs)</b>: To assess how well your liver is working.</li> <li>- <b>HBV DNA</b>: To measure the amount of hepatitis B virus in your blood.</li> <li>- <b>HBeAg and anti-HBe</b>: To monitor the virus's activity and your response to treatment.</li> <li>- <b>Alpha-fetoprotein (AFP)</b>: To screen for liver cancer.</li> <li>- <b>Ultrasound or Fibroscan</b>: To evaluate liver stiffness and potential cirrhosis.</li> </ul> <p>### <b>Communication with Your Healthcare Provider</b></p> <ul style="list-style-type: none"> <li>- <b>Symptom Reporting</b>: Always report any new or worsening symptoms to your healthcare provider promptly.</li> <li>- <b>Medication Adherence</b>: Ensure you take your medications as prescribed and discuss any issues with adherence.</li> </ul> <p>Regular check-ups are essential for managing chronic hepatitis B effectively, so following your healthcare provider's recommendations is crucial.</p> <p>If you have specific concerns or need more personalized advice, please let me know!</p> |
| 40. I have chronic hepatitis B and am currently pregnant; what should I be aware of? How can I prevent transmission to the newborn? | <p>Congratulations on your pregnancy! As someone with chronic hepatitis B, it's important to take specific measures to manage your condition and reduce the risk of transmitting the virus to your newborn. Here are some key considerations and recommendations:</p> <p>### <b>Understanding the Risks</b></p> <ol style="list-style-type: none"> <li>1. <b>Mother-to-Child Transmission</b>: The primary concern with hepatitis B during pregnancy is the risk of</li> </ol>                                                                                                                                                                                                                                                                                                                                                                                                                                                                                                                                                                                                                                                                                                                                                                                                                                           |

mother-to-child transmission, which can occur during childbirth. Without intervention, the transmission rate can be as high as 90%.

### ### \*\*Prenatal Management\*\*

#### 1. \*\*Regular Monitoring:\*\*

- \*\*Liver Function Tests:\*\* Regular blood tests to monitor liver function and viral load (HBV DNA levels).
- \*\*HBeAg Status:\*\* Determine if you are HBeAg positive, as this increases the risk of transmission.

#### 2. \*\*Antiviral Therapy:\*\*

- \*\*Consider Antiviral Treatment:\*\* If your viral load is high, your healthcare provider may recommend antiviral medications such as tenofovir or lamivudine, particularly in the third trimester, to reduce the risk of transmission.

#### 3. \*\*Vaccination Status:\*\*

- Ensure you are up-to-date with any necessary vaccinations and discuss your status with your healthcare provider.

### ### \*\*Delivery Considerations\*\*

#### 1. \*\*Mode of Delivery:\*\*

- \*\*No Need for C-Section Solely for Hepatitis B:\*\* Vaginal delivery is typically safe unless there are other medical indications for a cesarean section.

#### 2. \*\*Intrapartum Management:\*\*

- \*\*Avoid Invasive Procedures:\*\* Minimize procedures that may increase the risk of transmitting the virus, such as fetal scalp electrodes.

### ### \*\*Postnatal Care for the Newborn\*\*

#### 1. \*\*Immediate Vaccination:\*\*



- **Hepatitis B Vaccine:** Your baby should receive the first dose of the hepatitis B vaccine within 12 hours of birth.
  - **Hepatitis B Immune Globulin (HBIG):** This should also be administered within 12 hours of birth if available, providing immediate passive immunity.
2. **Follow-up Vaccinations:**
- **Complete Vaccine Series:** The baby should receive subsequent doses of the hepatitis B vaccine at 1–2 months and 6 months of age.
3. **Testing for Hepatitis B:**
- **Post-vaccination Testing:** After completing the vaccination series, the baby should be tested for hepatitis B surface antigen (HBsAg) and anti-HBs antibodies between 9 to 18 months to ensure immunity and check for infection.
- ### **Breastfeeding**
- **Safe to Breastfeed:** Hepatitis B is not transmitted through breast milk. You can breastfeed safely as long as the baby receives the hepatitis B vaccine and HBIG at birth.
- ### **General Health and Precautions**
1. **Healthy Lifestyle:**
- Maintain a healthy diet, avoid alcohol, and take care of your overall well-being to support your liver health.
2. **Regular Check-ups:**
- Continue regular follow-ups with your healthcare provider to monitor your condition and address any concerns promptly.
- ### **Communication with Healthcare Providers**
- **Inform All Providers:** Ensure all your healthcare providers, including your obstetrician, pediatrician, and

|                                                   |                                                                                                                                                                                                                                                                                                                                                                                                                                                                                                                                                                                                                                                                                                                                                                                                                                                                                                                                                                                               |
|---------------------------------------------------|-----------------------------------------------------------------------------------------------------------------------------------------------------------------------------------------------------------------------------------------------------------------------------------------------------------------------------------------------------------------------------------------------------------------------------------------------------------------------------------------------------------------------------------------------------------------------------------------------------------------------------------------------------------------------------------------------------------------------------------------------------------------------------------------------------------------------------------------------------------------------------------------------------------------------------------------------------------------------------------------------|
|                                                   | <p>hepatologist, are aware of your hepatitis B status to coordinate care effectively.</p> <p>### <b>**Emotional and Psychological Support**</b></p> <ul style="list-style-type: none"> <li>- <b>**Seek Support:**</b> Managing a chronic condition during pregnancy can be challenging. Consider joining support groups or seeking counseling to help manage stress and anxiety.</li> </ul> <p>### <b>**Summary Checklist**</b></p> <ul style="list-style-type: none"> <li>- Regular monitoring of liver function and viral load.</li> <li>- Consider antiviral treatment if recommended.</li> <li>- Ensure timely hepatitis B vaccination and HBIG for the newborn.</li> <li>- Follow through with post-vaccination testing.</li> <li>- Breastfeeding is safe with proper precautions.</li> </ul> <p>Feel free to discuss any specific concerns or additional questions with your healthcare provider to ensure the best care for you and your baby.</p>                                     |
| 41. I have hepatitis C; how should it be treated? | <p>As a laboratory physician, I can provide a comprehensive overview of the treatment options for Hepatitis C. Treatment for Hepatitis C has advanced significantly in recent years, leading to highly effective and well-tolerated therapies. Here are the key aspects of Hepatitis C treatment:</p> <p>### 1. <b>**Assessment and Diagnosis**</b></p> <ul style="list-style-type: none"> <li>- <b>**HCV RNA Test:**</b> Confirm the presence of the Hepatitis C virus in the blood.</li> <li>- <b>**Genotype Testing:**</b> Determine the specific genotype of the virus, as this can influence treatment choices.</li> <li>- <b>**Liver Assessment:**</b> Evaluate the extent of liver damage, often using elastography or a liver biopsy.</li> </ul> <p>### 2. <b>**Direct-Acting Antivirals (DAAs)**</b></p> <ul style="list-style-type: none"> <li>- <b>**Highly Effective:**</b> DAAs are the cornerstone of Hepatitis C treatment. They target specific steps in the viral</li> </ul> |

replication process.

- **Treatment Duration:** Typically, treatment lasts 8 to 12 weeks, depending on the genotype and the presence of cirrhosis.

- **Common DAAs:**

- Sofosbuvir/Velpatasvir
- Glecaprevir/Pibrentasvir
- Sofosbuvir/Ledipasvir

### 3. **Monitoring During Treatment**

- **Viral Load Testing:** Monitor HCV RNA levels at the start, during, and after treatment to assess response.

- **Liver Function Tests:** Regularly check liver enzymes and overall liver function.

- **Adverse Effects:** Although DAAs are well-tolerated, monitor for side effects like fatigue, headache, and gastrointestinal symptoms.

### 4. **Post-Treatment Follow-Up**

- **Sustained Virologic Response (SVR):** Check HCV RNA 12 weeks after completing treatment to confirm the virus is no longer detectable.

- **Long-Term Monitoring:** For patients with significant liver damage, continue to monitor liver health even after achieving SVR.

### 5. **Additional Considerations**

- **Drug Interactions:** Review all medications for potential interactions with DAAs.

- **Liver Health:** Advise on lifestyle changes to support liver health, including avoiding alcohol and maintaining a healthy diet.

- **Vaccinations:** Ensure vaccination against hepatitis A and B if not already immune.

|                                                               |                                                                                                                                                                                                                                                                                                                                                                                                                                                                                                                                                                                                                                                                                                                                                                                                                                                                                                                                                                                                                                                                                                                                                                                                                                                                         |
|---------------------------------------------------------------|-------------------------------------------------------------------------------------------------------------------------------------------------------------------------------------------------------------------------------------------------------------------------------------------------------------------------------------------------------------------------------------------------------------------------------------------------------------------------------------------------------------------------------------------------------------------------------------------------------------------------------------------------------------------------------------------------------------------------------------------------------------------------------------------------------------------------------------------------------------------------------------------------------------------------------------------------------------------------------------------------------------------------------------------------------------------------------------------------------------------------------------------------------------------------------------------------------------------------------------------------------------------------|
|                                                               | <p>### 6. <b>**Special Populations**</b></p> <ul style="list-style-type: none"> <li>- <b>**Cirrhosis:**</b> Patients with advanced liver disease may require longer treatment or additional medications.</li> <li>- <b>**Renal Impairment:**</b> Adjust treatment based on kidney function.</li> <li>- <b>**Coinfections:**</b> Manage co-existing conditions like HIV or hepatitis B concurrently.</li> </ul> <p>### 7. <b>**Access to Care**</b></p> <ul style="list-style-type: none"> <li>- <b>**Consult a Specialist:**</b> It's crucial to work with a healthcare provider specializing in infectious diseases or hepatology for tailored treatment.</li> <li>- <b>**Insurance and Support:**</b> Explore options for financial assistance and patient support programs if necessary.</li> </ul> <p>Treatment advancements mean that Hepatitis C can now be cured in the majority of cases, significantly reducing the risk of liver complications and improving overall health outcomes.</p> <p>If you have specific questions about your treatment or need detailed advice, please consult your healthcare provider or a specialist in infectious diseases or hepatology.</p> <p>Is there anything else you would like to know about Hepatitis C treatment?</p> |
| 42. What are the common medications for treating hepatitis C? | <p>As a laboratory physician, I'm happy to provide information on the common medications used to treat hepatitis C. Treatment for hepatitis C has significantly advanced over the years, and there are several effective medications available. The primary goal of treatment is to achieve a sustained virologic response (SVR), which means the virus is not detectable in the blood 12 weeks or more after completing treatment, indicating the infection is cured.</p> <p>### Direct-Acting Antivirals (DAAs)</p> <p>The most common and effective medications for treating hepatitis C are Direct-Acting Antivirals (DAAs). These medications target specific steps in the hepatitis C virus (HCV) life cycle to stop the virus from multiplying. Some commonly used DAAs include:</p>                                                                                                                                                                                                                                                                                                                                                                                                                                                                             |

1. **\*\*Sofosbuvir (Sovaldi)\*\***:

- A nucleotide analog polymerase inhibitor.
- Often combined with other medications like ledipasvir, velpatasvir, or daclatasvir.

2. **\*\*Ledipasvir/Sofosbuvir (Harvoni)\*\***:

- Combination of an NS5A inhibitor (ledipasvir) and an NS5B polymerase inhibitor (sofosbuvir).
- Used for genotypes 1, 4, 5, and 6.

3. **\*\*Velpatasvir/Sofosbuvir (Epclusa)\*\***:

- Combination of an NS5A inhibitor (velpatasvir) and an NS5B polymerase inhibitor (sofosbuvir).
- Pan-genotypic (effective against all genotypes).

4. **\*\*Glecaprevir/Pibrentasvir (Mavyret)\*\***:

- Combination of an NS3/4A protease inhibitor (glecaprevir) and an NS5A inhibitor (pibrentasvir).
- Pan-genotypic and often used for shorter treatment durations.

5. **\*\*Elbasvir/Grazoprevir (Zepatier)\*\***:

- Combination of an NS5A inhibitor (elbasvir) and an NS3/4A protease inhibitor (grazoprevir).
- Primarily used for genotypes 1 and 4.

6. **\*\*Daclatasvir (Daklinza)\*\***:

- An NS5A inhibitor.
- Often combined with sofosbuvir.

### Ribavirin

|                                                                            |                                                                                                                                                                                                                                                                                                                                                                                                                                                                                                                                                                                                                                                                                                                                                                                                                                                                                                                                                                                                                                                                                                                                                                                                                                                                                                                                                                                                                         |
|----------------------------------------------------------------------------|-------------------------------------------------------------------------------------------------------------------------------------------------------------------------------------------------------------------------------------------------------------------------------------------------------------------------------------------------------------------------------------------------------------------------------------------------------------------------------------------------------------------------------------------------------------------------------------------------------------------------------------------------------------------------------------------------------------------------------------------------------------------------------------------------------------------------------------------------------------------------------------------------------------------------------------------------------------------------------------------------------------------------------------------------------------------------------------------------------------------------------------------------------------------------------------------------------------------------------------------------------------------------------------------------------------------------------------------------------------------------------------------------------------------------|
|                                                                            | <ul style="list-style-type: none"> <li>- Occasionally used in combination with DAAs, especially for patients with cirrhosis or those who have failed previous treatments.</li> <li>- Ribavirin is a nucleoside analog that inhibits viral RNA synthesis and viral mRNA capping.</li> </ul> <p>### Interferon-Based Treatments</p> <ul style="list-style-type: none"> <li>- These were the standard treatment before the advent of DAAs and include pegylated interferon and ribavirin.</li> <li>- These are rarely used now due to their lower efficacy and higher side effect profile compared to DAAs.</li> </ul> <p>### Treatment Considerations</p> <ul style="list-style-type: none"> <li>- The choice of medication regimen depends on several factors, including the genotype of the virus, the presence of liver cirrhosis, previous treatment history, and any co-existing conditions like HIV.</li> <li>- Treatment duration typically ranges from 8 to 24 weeks.</li> </ul> <p>### Monitoring and Follow-Up</p> <ul style="list-style-type: none"> <li>- Regular monitoring of liver function tests and HCV RNA levels is essential during treatment.</li> <li>- Post-treatment follow-up is crucial to ensure sustained virologic response (SVR).</li> </ul> <p>If you have any more specific questions or need detailed information on a particular aspect of hepatitis C treatment, feel free to ask.</p> |
| 43. What tests should I undergo before starting treatment for hepatitis C? | <p>Before starting treatment for hepatitis C, it's important to undergo a series of tests to ensure an accurate diagnosis and to determine the best treatment plan. Here is a list of key tests and assessments:</p> <p>### **1. Hepatitis C Virus (HCV) Antibody Test**</p> <ul style="list-style-type: none"> <li>- <b>Purpose:</b> To check if you have been exposed to the hepatitis C virus.</li> <li>- <b>Interpretation:</b> A positive result indicates past or present infection.</li> </ul>                                                                                                                                                                                                                                                                                                                                                                                                                                                                                                                                                                                                                                                                                                                                                                                                                                                                                                                   |

### ### \*\*2. HCV RNA Test (Quantitative PCR)\*\*

- \*\*Purpose:\*\* To confirm an active infection by detecting the presence of the virus's genetic material.
- \*\*Interpretation:\*\* Positive result confirms an active infection; it also quantifies the viral load.

### ### \*\*3. HCV Genotype Test

- \*\*Purpose:\*\* To determine the specific genotype of the hepatitis C virus.
- \*\*Interpretation:\*\* Helps tailor the treatment plan as different genotypes may respond differently to treatments.

### ### \*\*4. Liver Function Tests (LFTs)

- \*\*Purpose:\*\* To assess the health of your liver by measuring levels of liver enzymes and other substances in the blood.
- \*\*Key Components:\*\* ALT, AST, ALP, bilirubin.
- \*\*Interpretation:\*\* Elevated levels may indicate liver damage.

### ### \*\*5. Liver Fibrosis Assessment

- \*\*Purpose:\*\* To evaluate the extent of liver fibrosis or cirrhosis.
- \*\*Methods:\*\*
  - \*\*Non-invasive Tests:\*\* FibroScan, FibroTest.
  - \*\*Invasive Test:\*\* Liver biopsy.
- \*\*Interpretation:\*\* Helps in determining the stage of liver disease.

### ### \*\*6. Complete Blood Count (CBC)

- \*\*Purpose:\*\* To assess overall health and detect disorders like anemia or infection.
- \*\*Key Components:\*\* White blood cells, red blood cells, platelets.
- \*\*Interpretation:\*\* Provides a baseline and helps monitor treatment side effects.

#### ### \*\*7. Tests for Co-infections\*\*

- \*\*Purpose:\*\* To check for other infections that might complicate hepatitis C treatment.
- \*\*Key Tests:\*\*
  - \*\*HIV Test\*\*
  - \*\*Hepatitis B Surface Antigen (HBsAg) Test\*\*
- \*\*Interpretation:\*\* Co-infections may require a modified treatment approach.

#### ### \*\*8. Renal Function Tests\*\*

- \*\*Purpose:\*\* To assess kidney function, especially if planning to use medications that affect the kidneys.
- \*\*Key Components:\*\* Creatinine, Blood Urea Nitrogen (BUN).
- \*\*Interpretation:\*\* Ensures safe medication dosing.

#### ### \*\*9. Thyroid Function Tests\*\*

- \*\*Purpose:\*\* To check for thyroid abnormalities which can be affected by certain hepatitis C treatments.
- \*\*Key Components:\*\* TSH, T3, T4.
- \*\*Interpretation:\*\* Identifies any underlying thyroid issues.

#### ### \*\*10. Glucose Metabolism Tests\*\*

- \*\*Purpose:\*\* To assess the risk of diabetes, which is more common in people with hepatitis C.
- \*\*Key Components:\*\* Fasting glucose, HbA1c.
- \*\*Interpretation:\*\* Helps in managing and preventing complications.

#### ### \*\*11. Pregnancy Test (if applicable)\*\*

- \*\*Purpose:\*\* To ensure that a female patient is not pregnant before starting treatment, as some medications may harm the fetus.
- \*\*Interpretation:\*\* Determines the need for treatment modifications or delay.



|                                                                                                                                    |                                                                                                                                                                                                                                                                                                                                                                                                                                                                                                                                                                                                                                                                                                                                                                                                                                                                                                                                                                                            |
|------------------------------------------------------------------------------------------------------------------------------------|--------------------------------------------------------------------------------------------------------------------------------------------------------------------------------------------------------------------------------------------------------------------------------------------------------------------------------------------------------------------------------------------------------------------------------------------------------------------------------------------------------------------------------------------------------------------------------------------------------------------------------------------------------------------------------------------------------------------------------------------------------------------------------------------------------------------------------------------------------------------------------------------------------------------------------------------------------------------------------------------|
|                                                                                                                                    | <p>### **12. Electrocardiogram (ECG)**</p> <ul style="list-style-type: none"> <li>- **Purpose:** To check heart health, especially if you have a history of heart disease or if medications used in treatment can affect the heart.</li> <li>- **Interpretation:** Baseline heart health assessment.</li> </ul> <p>### **13. Genetic Testing for IL28B (optional)**</p> <ul style="list-style-type: none"> <li>- **Purpose:** To predict treatment response.</li> <li>- **Interpretation:** Specific genetic markers can indicate a better or worse response to certain treatments.</li> </ul> <p>These tests provide a comprehensive overview of your health and ensure that your treatment for hepatitis C is as effective and safe as possible. Always consult with your healthcare provider to determine which tests are necessary for your specific condition.</p> <p>If you have more specific questions or need detailed explanations for any of these tests, feel free to ask!</p> |
| 44. I have hepatitis C and high blood pressure; which blood pressure medications should not be taken with hepatitis C medications? | <p>Managing hepatitis C and high blood pressure requires careful consideration of drug interactions to avoid adverse effects. Some blood pressure medications can interact with hepatitis C treatments, particularly the newer direct-acting antiviral (DAA) medications. Here are key points to consider:</p> <p>### Common Hepatitis C Medications</p> <ol style="list-style-type: none"> <li>1. **Direct-acting antivirals (DAAs)** like sofosbuvir, ledipasvir, velpatasvir, and glecaprevir/pibrentasvir.</li> <li>2. **Ribavirin**, an older medication often used in combination with DAAs.</li> <li>3. **Pegylated interferon** (less commonly used now).</li> </ol> <p>### Blood Pressure Medications to Avoid or Use with Caution</p> <ol style="list-style-type: none"> <li>1. **Calcium Channel Blockers (CCBs)**</li> </ol>                                                                                                                                                   |

- Examples: Amlodipine, verapamil, diltiazem.
- Interaction: These can increase blood levels of certain DAAs, leading to higher risk of side effects.
- Recommendation: If necessary, use the lowest possible dose and monitor closely, or consider alternatives.

2. **Beta-Blockers**

- Examples: Metoprolol, atenolol, propranolol.
- Interaction: Generally safer, but drugs like carvedilol may require careful monitoring due to potential pharmacokinetic interactions.
- Recommendation: Prefer beta-blockers with lower interaction potential and monitor for blood pressure control.

3. **ACE Inhibitors and ARBs**

- Examples: Lisinopril (ACE inhibitor), losartan (ARB).
- Interaction: Generally considered safe with DAAs but monitor renal function and potassium levels, as some interactions may occur with certain regimens.
- Recommendation: Regular monitoring is key, but these are often preferred for patients with both conditions.

4. **Diuretics**

- Examples: Hydrochlorothiazide, furosemide.
- Interaction: Potential for electrolyte imbalance, which could be exacerbated by hepatitis C medications.
- Recommendation: Monitor electrolytes and kidney function regularly.

5. **Central Alpha-2 Agonists**

- Examples: Clonidine.
- Interaction: Generally minimal direct interaction, but central nervous system effects might be enhanced.
- Recommendation: Use cautiously and monitor for central side effects.

|                                                                                                                          |                                                                                                                                                                                                                                                                                                                                                                                                                                                                                                                                                                                                                                                                                                                                                                                                                                                                                                                                                                                                                                                                                                                                                                                                                                                                                                                                                                                                                                                                                                    |
|--------------------------------------------------------------------------------------------------------------------------|----------------------------------------------------------------------------------------------------------------------------------------------------------------------------------------------------------------------------------------------------------------------------------------------------------------------------------------------------------------------------------------------------------------------------------------------------------------------------------------------------------------------------------------------------------------------------------------------------------------------------------------------------------------------------------------------------------------------------------------------------------------------------------------------------------------------------------------------------------------------------------------------------------------------------------------------------------------------------------------------------------------------------------------------------------------------------------------------------------------------------------------------------------------------------------------------------------------------------------------------------------------------------------------------------------------------------------------------------------------------------------------------------------------------------------------------------------------------------------------------------|
|                                                                                                                          | <p>6. <b>**Direct Renin Inhibitors**</b></p> <ul style="list-style-type: none"> <li>- Example: Aliskiren.</li> <li>- Interaction: Limited data on interactions, but use caution due to potential unknown effects.</li> <li>- Recommendation: Consider alternative blood pressure medications if possible.</li> </ul> <p>### General Recommendations</p> <ul style="list-style-type: none"> <li>- <b>**Consultation**</b>: Always work closely with your healthcare provider to tailor your treatment plan, considering both your hepatitis C and hypertension management.</li> <li>- <b>**Monitoring**</b>: Regular monitoring of liver function, kidney function, and blood pressure is crucial.</li> <li>- <b>**Medication Review**</b>: Your doctor should regularly review your medications to ensure no adverse interactions and adjust doses if necessary.</li> </ul> <p>### Important Notes</p> <ul style="list-style-type: none"> <li>- <b>**Adjustments**</b>: Dosage adjustments or substitutions of blood pressure medications might be necessary based on the specific hepatitis C regimen.</li> <li>- <b>**Adherence**</b>: Ensure adherence to both blood pressure and hepatitis C treatments for optimal health outcomes.</li> </ul> <p>By carefully selecting and monitoring medications, you can effectively manage both conditions with minimal risk of adverse interactions.</p> <p>Would you like to know more about any specific medication or condition related to this?</p> |
| <p>45. I have hepatitis C and diabetes; which diabetic medications should not be taken with hepatitis C medications?</p> | <p>When managing both hepatitis C (HCV) and diabetes, it is essential to consider potential interactions between medications used for each condition. Here are some key considerations:</p>                                                                                                                                                                                                                                                                                                                                                                                                                                                                                                                                                                                                                                                                                                                                                                                                                                                                                                                                                                                                                                                                                                                                                                                                                                                                                                        |

### 1. **Metformin**

- **Caution**: While generally safe, metformin may need monitoring in patients with liver impairment, as it can increase the risk of lactic acidosis, especially in severe liver disease. If liver function is significantly compromised by HCV, alternative medications may be preferable.

### 2. **Sulfonylureas (e.g., Glipizide, Glyburide)**

- **Potential Interaction**: These medications can lead to hypoglycemia, and liver function plays a role in their metabolism. Severe liver impairment could increase the risk of hypoglycemia.
- **HCV Medications**: No direct interactions with most direct-acting antivirals (DAAs), but careful monitoring of liver function is necessary.

### 3. **Insulin**

- **General Safety**: Insulin is generally safe and effective, even in patients with liver disease, as it does not rely on liver metabolism.
- **No Major Interactions**: Most HCV medications do not interact significantly with insulin.

### 4. **Thiazolidinediones (e.g., Pioglitazone)**

- **Liver Concerns**: These drugs can cause liver toxicity; monitoring liver enzymes is recommended.
- **Interaction**: No significant interactions with HCV medications, but liver function monitoring is crucial due to the potential for hepatic toxicity.

### 5. **DPP-4 Inhibitors (e.g., Sitagliptin)**

- **Safety Profile**: Generally well-tolerated, including in patients with mild to moderate hepatic impairment.
- **Interaction**: No significant interactions with most HCV medications.

### 6. **GLP-1 Receptor Agonists (e.g., Liraglutide)**

|  |                                                                                                                                                                                                                                                                                                                                                                                                                                                                                                                                                                                                                                                                                                                                                                                                                                                                                                                                                                                                                                                                                                                                                                                                                                                                                                                                                                                                                                                                                                                                                                                                                                                                                                                                                                                                                                                                                                                                                                          |
|--|--------------------------------------------------------------------------------------------------------------------------------------------------------------------------------------------------------------------------------------------------------------------------------------------------------------------------------------------------------------------------------------------------------------------------------------------------------------------------------------------------------------------------------------------------------------------------------------------------------------------------------------------------------------------------------------------------------------------------------------------------------------------------------------------------------------------------------------------------------------------------------------------------------------------------------------------------------------------------------------------------------------------------------------------------------------------------------------------------------------------------------------------------------------------------------------------------------------------------------------------------------------------------------------------------------------------------------------------------------------------------------------------------------------------------------------------------------------------------------------------------------------------------------------------------------------------------------------------------------------------------------------------------------------------------------------------------------------------------------------------------------------------------------------------------------------------------------------------------------------------------------------------------------------------------------------------------------------------------|
|  | <ul style="list-style-type: none"><li>- <b>Hepatic Considerations</b>: Limited data on use in severe liver disease. Generally safe in mild to moderate hepatic impairment.</li><li>- <b>No Major Interactions</b>: Most HCV medications do not interact significantly with GLP-1 receptor agonists.</li></ul> <p>### 7. <b>SGLT-2 Inhibitors (e.g., Canagliflozin)</b></p> <ul style="list-style-type: none"><li>- <b>Liver Impact</b>: Not significantly affected by liver function.</li><li>- <b>Interaction</b>: Minimal interaction with HCV medications, but watch for dehydration or electrolyte imbalances, which could complicate liver disease.</li></ul> <p>### Specific HCV Medications:</p> <ul style="list-style-type: none"><li>- <b>DAA</b>s (e.g., Sofosbuvir, Ledipasvir, Velpatasvir): These are commonly used HCV treatments. They have limited interactions with most diabetes medications, but always check specific drug interaction data as combinations can vary.</li></ul> <p>### General Recommendations:</p> <ol style="list-style-type: none"><li>1. <b>Consultation with a Specialist</b>: Always consult with a hepatologist and endocrinologist when managing both conditions to tailor the treatment plan.</li><li>2. <b>Regular Monitoring</b>: Frequent liver function tests and monitoring blood glucose levels are crucial to manage potential interactions and side effects.</li><li>3. <b>Medication Review</b>: A comprehensive review of all medications by healthcare professionals to avoid interactions and ensure the safety and efficacy of the treatment regimen.</li></ol> <p>### Conclusion:</p> <p>While most diabetes medications can be safely used in patients with hepatitis C, the choice of medication should be individualized, taking into account the degree of liver impairment and potential drug-drug interactions. Regular consultation with healthcare providers is essential for optimal management.</p> |
|--|--------------------------------------------------------------------------------------------------------------------------------------------------------------------------------------------------------------------------------------------------------------------------------------------------------------------------------------------------------------------------------------------------------------------------------------------------------------------------------------------------------------------------------------------------------------------------------------------------------------------------------------------------------------------------------------------------------------------------------------------------------------------------------------------------------------------------------------------------------------------------------------------------------------------------------------------------------------------------------------------------------------------------------------------------------------------------------------------------------------------------------------------------------------------------------------------------------------------------------------------------------------------------------------------------------------------------------------------------------------------------------------------------------------------------------------------------------------------------------------------------------------------------------------------------------------------------------------------------------------------------------------------------------------------------------------------------------------------------------------------------------------------------------------------------------------------------------------------------------------------------------------------------------------------------------------------------------------------------|

|                                                                                                                                             |                                                                                                                                                                                                                                                                                                                                                                                                                                                                                                                                                                                                                                                                                                                                                                                                                                                                                                                                                                                                                                                                                                                                                                                                                                                                                                                                                                                                                                                                                                                                                                                                                                                                                                                                                                                                                                                                                                                                                                                                  |
|---------------------------------------------------------------------------------------------------------------------------------------------|--------------------------------------------------------------------------------------------------------------------------------------------------------------------------------------------------------------------------------------------------------------------------------------------------------------------------------------------------------------------------------------------------------------------------------------------------------------------------------------------------------------------------------------------------------------------------------------------------------------------------------------------------------------------------------------------------------------------------------------------------------------------------------------------------------------------------------------------------------------------------------------------------------------------------------------------------------------------------------------------------------------------------------------------------------------------------------------------------------------------------------------------------------------------------------------------------------------------------------------------------------------------------------------------------------------------------------------------------------------------------------------------------------------------------------------------------------------------------------------------------------------------------------------------------------------------------------------------------------------------------------------------------------------------------------------------------------------------------------------------------------------------------------------------------------------------------------------------------------------------------------------------------------------------------------------------------------------------------------------------------|
|                                                                                                                                             | If you have specific medications in mind or need further personalized advice, please let me know!                                                                                                                                                                                                                                                                                                                                                                                                                                                                                                                                                                                                                                                                                                                                                                                                                                                                                                                                                                                                                                                                                                                                                                                                                                                                                                                                                                                                                                                                                                                                                                                                                                                                                                                                                                                                                                                                                                |
| 46. I have hepatitis C and coronary heart disease; which cholesterol-lowering medications should not be taken with hepatitis C medications? | <p>For individuals with hepatitis C and coronary heart disease, it's crucial to be cautious about potential interactions between cholesterol-lowering medications (statins) and hepatitis C treatments. Here are some considerations for specific statins:</p> <p>### Statins with Potential Interactions</p> <ol style="list-style-type: none"> <li>1. <b>Simvastatin (Zocor)</b> and <b>Lovastatin (Mevacor)</b>: <ul style="list-style-type: none"> <li>- Both can interact with hepatitis C medications, especially those that are protease inhibitors (PIs). These interactions can lead to increased statin levels, causing muscle toxicity (myopathy or rhabdomyolysis).</li> <li>- Example: Simvastatin should be avoided with most protease inhibitors (like boceprevir, telaprevir).</li> </ul> </li> <li>2. <b>Atorvastatin (Lipitor)</b>: <ul style="list-style-type: none"> <li>- Atorvastatin levels can increase significantly when combined with hepatitis C medications, leading to a higher risk of muscle-related side effects.</li> <li>- Caution is advised when using atorvastatin with medications like ledipasvir/sofosbuvir (Harvoni) or glecaprevir/pibrentasvir (Mavyret). Dosage adjustments or alternative therapies might be necessary.</li> </ul> </li> <li>3. <b>Rosuvastatin (Crestor)</b>: <ul style="list-style-type: none"> <li>- Interactions can increase the risk of adverse effects. It should be used cautiously with hepatitis C drugs such as glecaprevir/pibrentasvir or sofosbuvir/velpatasvir/voxilaprevir (Vosevi). Lower doses are often recommended.</li> </ul> </li> </ol> <p>### Statins with Fewer Interactions</p> <ol style="list-style-type: none"> <li>1. <b>Pravastatin (Pravachol)</b>: <ul style="list-style-type: none"> <li>- Pravastatin has fewer drug interactions compared to other statins. It is generally considered safer to use with hepatitis C medications, though monitoring is still necessary.</li> </ul> </li> </ol> |

|                                                                                                                                                                     |                                                                                                                                                                                                                                                                                                                                                                                                                                                                                                                                                                                                                                                                                                                                                                                                                                                                                                                                                                                                                                                                                                                                                                                                             |
|---------------------------------------------------------------------------------------------------------------------------------------------------------------------|-------------------------------------------------------------------------------------------------------------------------------------------------------------------------------------------------------------------------------------------------------------------------------------------------------------------------------------------------------------------------------------------------------------------------------------------------------------------------------------------------------------------------------------------------------------------------------------------------------------------------------------------------------------------------------------------------------------------------------------------------------------------------------------------------------------------------------------------------------------------------------------------------------------------------------------------------------------------------------------------------------------------------------------------------------------------------------------------------------------------------------------------------------------------------------------------------------------|
|                                                                                                                                                                     | <p>2. <b>Pitavastatin (Livalo)</b>:</p> <ul style="list-style-type: none"> <li>- Similar to pravastatin, pitavastatin has a lower risk of interactions and can be a safer choice.</li> </ul> <p>### General Recommendations</p> <ul style="list-style-type: none"> <li>- <b>Regular Monitoring</b>: It's crucial to monitor liver function tests and statin levels periodically to avoid toxicity.</li> <li>- <b>Adjust Dosage</b>: If a statin must be used with a hepatitis C medication, starting with the lowest possible dose and adjusting based on response and side effects is advisable.</li> <li>- <b>Consult Healthcare Providers</b>: Always discuss with your healthcare provider to ensure the safety and efficacy of your treatment plan, considering potential drug-drug interactions.</li> </ul> <p>### Conclusion</p> <p>To minimize risks, opt for statins like pravastatin or pitavastatin, which have fewer interactions with hepatitis C medications. Always consult your healthcare provider for personalized advice tailored to your medical history and treatment needs.</p> <p>Feel free to ask more questions or provide additional details if you need further information!</p> |
| <p>47. After standardized treatment for hepatitis C, if the hepatitis C RNA test is negative but hepatitis C antibodies are still positive, is there a problem?</p> | <p>If you have undergone standardized treatment for hepatitis C and your hepatitis C RNA test is negative but hepatitis C antibodies are still positive, it generally indicates that the treatment was successful. Here's a detailed explanation:</p> <p>### Understanding Hepatitis C Testing</p> <ol style="list-style-type: none"> <li>1. <b>Hepatitis C Antibodies (Anti-HCV)</b>: <ul style="list-style-type: none"> <li>- These are proteins produced by your immune system in response to the hepatitis C virus (HCV). Once you are exposed to HCV, your body produces these antibodies, and they remain in your blood for life, even if the virus is no longer present.</li> </ul> </li> <li>2. <b>Hepatitis C RNA (HCV RNA) Test</b>:</li> </ol>                                                                                                                                                                                                                                                                                                                                                                                                                                                   |

- This test detects the presence of the actual hepatitis C virus in your blood. A negative result indicates that the virus is not detectable, meaning the treatment has likely cleared the virus from your body.

#### ### Interpretation of Results

##### - \*\*Positive Antibodies and Negative RNA:\*\*

- This is a common and expected outcome after successful treatment for hepatitis C. The presence of antibodies simply means you were exposed to the virus at some point, but the negative RNA result confirms that the virus is no longer in your blood.

#### ### Key Points

##### - \*\*No Active Infection:\*\*

- A negative RNA test means that you do not have an active hepatitis C infection, and the virus has been cleared from your bloodstream. You are considered cured in terms of the infection being resolved, although you will still have the antibodies.

##### - \*\*Not Contagious:\*\*

- Since there is no active virus in your bloodstream, you cannot spread hepatitis C to others.

##### - \*\*Antibodies Persist:\*\*

- The antibodies can remain in your blood indefinitely and are a marker of past infection, not current disease.

#### ### No Cause for Concern

##### - \*\*No Further Treatment Needed:\*\*

- If your HCV RNA test is negative, you typically do not require further treatment for hepatitis C. However, regular follow-up with your healthcare provider is important to monitor your overall liver health.



|                                                                                                                                                                                                 |                                                                                                                                                                                                                                                                                                                                                                                                                                                                                                                                                                                                                                                                                                                                                                                                                                                                                                                                                                                                                                                                           |
|-------------------------------------------------------------------------------------------------------------------------------------------------------------------------------------------------|---------------------------------------------------------------------------------------------------------------------------------------------------------------------------------------------------------------------------------------------------------------------------------------------------------------------------------------------------------------------------------------------------------------------------------------------------------------------------------------------------------------------------------------------------------------------------------------------------------------------------------------------------------------------------------------------------------------------------------------------------------------------------------------------------------------------------------------------------------------------------------------------------------------------------------------------------------------------------------------------------------------------------------------------------------------------------|
|                                                                                                                                                                                                 | <p>- <b>**Continued Health Monitoring:**</b></p> <ul style="list-style-type: none"> <li>- Even though the hepatitis C virus is no longer present, it's essential to continue managing any potential liver damage or other health issues related to past infection, particularly since you mentioned having diabetes, which can complicate liver health.</li> </ul> <p>### When to Seek Further Advice</p> <ul style="list-style-type: none"> <li>- If you experience new or unexplained symptoms, or if there are any changes in your health, it is important to consult with your healthcare provider for further evaluation and monitoring.</li> </ul> <p>If you have any specific concerns or further questions about your hepatitis C status or treatment, it would be best to discuss them with your healthcare provider, who can provide personalized advice based on your medical history and current health status.</p> <p>Would you like more information on how to monitor your liver health or manage other conditions related to hepatitis C or diabetes?</p> |
| <p>48. I have hepatitis C; after one month of antiviral treatment, the hepatitis C RNA test is negative; do I need to continue treatment for 3 to 6 months according to the treatment plan?</p> | <p>Congratulations on your negative hepatitis C RNA test after one month of antiviral treatment! This is a significant milestone, indicating that the virus is no longer detectable in your blood. However, it's crucial to continue your treatment as prescribed by your healthcare provider, typically for a total of 3 to 6 months. Here's why:</p> <ol style="list-style-type: none"> <li>1. <b>**Ensuring Complete Eradication**</b>: Continuing treatment helps ensure that any remaining virus is completely eradicated. Stopping treatment early, even if the virus is undetectable, can increase the risk of relapse or the virus becoming detectable again.</li> <li>2. <b>**Sustained Virological Response (SVR)**</b>: The goal of hepatitis C treatment is to achieve a sustained virological response (SVR), meaning the virus remains undetectable for a significant period after completing treatment, usually 12 to 24 weeks post-treatment. Achieving SVR is associated with a high likelihood of being cured of hepatitis C.</li> </ol>                |

|                                                                                                                        |                                                                                                                                                                                                                                                                                                                                                                                                                                                                                                                                                                                                                                                                                                                                                                                                                                                                                                                                                                                                                                                                                                                                                                                                                                                                                                                                                                                                                                                                      |
|------------------------------------------------------------------------------------------------------------------------|----------------------------------------------------------------------------------------------------------------------------------------------------------------------------------------------------------------------------------------------------------------------------------------------------------------------------------------------------------------------------------------------------------------------------------------------------------------------------------------------------------------------------------------------------------------------------------------------------------------------------------------------------------------------------------------------------------------------------------------------------------------------------------------------------------------------------------------------------------------------------------------------------------------------------------------------------------------------------------------------------------------------------------------------------------------------------------------------------------------------------------------------------------------------------------------------------------------------------------------------------------------------------------------------------------------------------------------------------------------------------------------------------------------------------------------------------------------------|
|                                                                                                                        | <p>3. <b>**Preventing Resistance**</b>: Completing the full course of treatment reduces the risk of the virus developing resistance to the medication, which could make future treatment more difficult.</p> <p>4. <b>**Guidelines and Protocols**</b>: Clinical guidelines recommend completing the prescribed course of antiviral treatment to maximize the chances of a successful cure. These recommendations are based on extensive research and clinical trials.</p> <p>5. <b>**Monitoring and Follow-up**</b>: Your healthcare provider will likely continue to monitor your hepatitis C RNA levels and liver function after treatment to ensure that the virus remains undetectable and that your liver health is improving.</p> <p>### What to Do Next:</p> <ul style="list-style-type: none"> <li>- <b>**Continue Your Medication**</b>: Stick to your prescribed treatment plan without interruption.</li> <li>- <b>**Regular Monitoring**</b>: Keep up with follow-up appointments and any required lab tests to monitor your progress.</li> <li>- <b>**Consult Your Doctor**</b>: Always discuss any concerns or side effects with your healthcare provider before making any changes to your treatment plan.</li> </ul> <p>If you have any specific concerns or need personalized advice, it's best to consult your healthcare provider directly.</p> <p>Would you like more information on what to expect during and after hepatitis C treatment?</p> |
| 49. If I have been treated for hepatitis C according to the treatment plan and recovered, can I get hepatitis C again? | <p>Yes, it is possible to get hepatitis C again after treatment and recovery. The treatment for hepatitis C, often involving direct-acting antivirals (DAAs), can cure the infection in many people. However, it does not provide immunity against future infections. Here's what you need to know:</p> <p>### Key Points:</p>                                                                                                                                                                                                                                                                                                                                                                                                                                                                                                                                                                                                                                                                                                                                                                                                                                                                                                                                                                                                                                                                                                                                       |

|                                                                                                                                         |                                                                                                                                                                                                                                                                                                                                                                                                                                                                                                                                                                                                                                                                                                                                                                                                                                                                                                                                                                                                                                                                                                                                                                                                                                                                                                                                                                                                                                                                                                                                                                                                                           |
|-----------------------------------------------------------------------------------------------------------------------------------------|---------------------------------------------------------------------------------------------------------------------------------------------------------------------------------------------------------------------------------------------------------------------------------------------------------------------------------------------------------------------------------------------------------------------------------------------------------------------------------------------------------------------------------------------------------------------------------------------------------------------------------------------------------------------------------------------------------------------------------------------------------------------------------------------------------------------------------------------------------------------------------------------------------------------------------------------------------------------------------------------------------------------------------------------------------------------------------------------------------------------------------------------------------------------------------------------------------------------------------------------------------------------------------------------------------------------------------------------------------------------------------------------------------------------------------------------------------------------------------------------------------------------------------------------------------------------------------------------------------------------------|
|                                                                                                                                         | <p>1. <b>**Reinfection Risk**</b>: You can become reinfected with hepatitis C if you are exposed to the virus again. Reinfection is possible because, unlike some other viruses, hepatitis C does not induce a protective immune response that prevents future infections.</p> <p>2. <b>**High-Risk Behaviors**</b>: Engaging in activities that increase your risk of exposure to hepatitis C, such as sharing needles or other drug paraphernalia, unprotected sex with a person who has hepatitis C, or receiving blood products in countries where hepatitis C screening is not routine, can lead to reinfection.</p> <p>3. <b>**Monitoring**</b>: Even after successful treatment, it's important to continue monitoring your liver health and being cautious about activities that could expose you to the virus again.</p> <p>4. <b>**Preventive Measures**</b>: To minimize the risk of reinfection, avoid sharing needles or personal items that might be contaminated with blood, and consider safer practices if you are at risk through sexual contact or other exposures.</p> <p>5. <b>**No Immunity**</b>: Unlike vaccines for diseases like hepatitis A and B, there is currently no vaccine for hepatitis C that can prevent infection or reinfection.</p> <p>6. <b>**Liver Health**</b>: After recovery, maintaining liver health through regular check-ups, avoiding alcohol, and managing conditions like diabetes that can affect the liver is crucial.</p> <p>If you have any more questions about hepatitis C or need advice on maintaining your liver health post-treatment, feel free to ask!</p> |
| 50. If I have been treated for hepatitis C according to the treatment plan and recovered, do I need further check-ups? How often should | <p>Congratulations on your recovery from hepatitis C! Even after successful treatment, follow-up check-ups are important to monitor for any potential recurrence, long-term liver health, and to manage any other complications that might arise. Here's a general guideline for post-treatment follow-ups:</p>                                                                                                                                                                                                                                                                                                                                                                                                                                                                                                                                                                                                                                                                                                                                                                                                                                                                                                                                                                                                                                                                                                                                                                                                                                                                                                           |

check-ups be done?

### ### Immediate Follow-Up After Treatment

1. \*\*SVR (Sustained Virologic Response) Check\*\*:

- \*\*Timing\*\*: Typically, 12 weeks after the completion of treatment.
- \*\*Purpose\*\*: To confirm that the virus is no longer detectable in your blood, indicating that the treatment was successful.

### ### Long-Term Follow-Up

2. \*\*Liver Function Tests\*\*:

- \*\*Frequency\*\*: Every 6 to 12 months.
- \*\*Purpose\*\*: To monitor liver health and ensure no ongoing liver damage or complications.

3. \*\*Ultrasound or FibroScan\*\*:

- \*\*Frequency\*\*: Annually.
- \*\*Purpose\*\*: Especially if there was advanced liver fibrosis or cirrhosis before treatment, these imaging tests help in early detection of liver complications such as liver cancer (hepatocellular carcinoma).

4. \*\*HCC (Hepatocellular Carcinoma) Screening\*\*:

- \*\*Frequency\*\*: Every 6 months if you had cirrhosis.
- \*\*Purpose\*\*: To screen for liver cancer, as the risk remains elevated even after successful treatment in those with cirrhosis.

5. \*\*General Health Check-Ups\*\*:

- \*\*Frequency\*\*: Annually or as recommended by your healthcare provider.

|                                                                      |                                                                                                                                                                                                                                                                                                                                                                                                                                                                                                                                                                                                                                                                                                                                                                                                                                                                                                                                                                                                                                                                                                                                                                                                                                                                                                                                                                                |
|----------------------------------------------------------------------|--------------------------------------------------------------------------------------------------------------------------------------------------------------------------------------------------------------------------------------------------------------------------------------------------------------------------------------------------------------------------------------------------------------------------------------------------------------------------------------------------------------------------------------------------------------------------------------------------------------------------------------------------------------------------------------------------------------------------------------------------------------------------------------------------------------------------------------------------------------------------------------------------------------------------------------------------------------------------------------------------------------------------------------------------------------------------------------------------------------------------------------------------------------------------------------------------------------------------------------------------------------------------------------------------------------------------------------------------------------------------------|
|                                                                      | <ul style="list-style-type: none"> <li>- <b>Purpose</b>: To monitor overall health, manage other conditions (like diabetes), and ensure no other complications related to liver health.</li> </ul> <p>6. <b>Specialist Visits</b>:</p> <ul style="list-style-type: none"> <li>- <b>Frequency</b>: As advised by your healthcare provider.</li> <li>- <b>Purpose</b>: Regular consultations with a hepatologist or liver specialist for tailored advice and ongoing management.</li> </ul> <p>### Additional Considerations</p> <ul style="list-style-type: none"> <li>- <b>Lifestyle Modifications</b>: Continue to follow a liver-healthy lifestyle, including avoiding alcohol, eating a balanced diet, and maintaining a healthy weight.</li> <li>- <b>Vaccinations</b>: Ensure you are vaccinated against hepatitis A and B to prevent additional liver infections.</li> <li>- <b>Managing Other Conditions</b>: Keep managing your diabetes and any other chronic conditions diligently, as they can affect liver health.</li> </ul> <p>Regular check-ups will help ensure that any potential issues are detected early and managed effectively. Always discuss with your healthcare provider to tailor the follow-up plan to your specific needs and circumstances.</p> <p>If you have specific questions or concerns about your follow-up care, please let me know!</p> |
| 51. If diagnosed with chronic hepatitis E, how should it be treated? | <p>Chronic hepatitis E, particularly in immunocompromised individuals, requires specific treatment strategies to manage the infection and reduce the risk of liver damage. The approach to treating chronic hepatitis E generally involves the following steps:</p>                                                                                                                                                                                                                                                                                                                                                                                                                                                                                                                                                                                                                                                                                                                                                                                                                                                                                                                                                                                                                                                                                                            |

### \*\*1. Assess the Patient's Immune Status:\*\*

- Chronic hepatitis E is more likely to occur in individuals with weakened immune systems, such as organ transplant recipients, individuals on immunosuppressive therapy, or those with HIV/AIDS. Understanding the patient's immune status is crucial for tailoring treatment.

### \*\*2. Reduce Immunosuppression (if applicable):\*\*

- If the patient is on immunosuppressive drugs, such as those used in organ transplantation, the first step is often to reduce the dosage of these medications, if possible. This can help the patient's immune system to better fight the hepatitis E virus (HEV).

### \*\*3. Antiviral Therapy:\*\*

- **Ribavirin:** The most commonly used antiviral treatment for chronic hepatitis E is ribavirin. It is an oral antiviral medication that has shown efficacy in reducing HEV RNA levels and leading to viral clearance in many cases. The typical duration of treatment ranges from 3 to 6 months.

- **Pegylated Interferon:** In some cases, especially when ribavirin is contraindicated or not effective, pegylated interferon may be considered. This is less commonly used due to potential side effects and limited efficacy in some patient populations.

### \*\*4. Monitor Viral Load and Liver Function:\*\*

- Regular monitoring of HEV RNA levels in the blood is important to assess the effectiveness of treatment. Liver function tests should also be performed to monitor the status of the liver and detect any signs of liver damage or improvement.

### \*\*5. Address Underlying Conditions:\*\*

- If the patient has other underlying conditions, such as chronic liver disease or co-infections (e.g., hepatitis B or C), these should be managed concurrently to optimize overall health and reduce the risk of complications.

|                                                                       |                                                                                                                                                                                                                                                                                                                                                                                                                                                                                                                                                                                                                                                                                                                                                                                                                                                                                                                                                                                                                                                                                                                                                                                                                                                                                                                                                                                                                                                                                                                                                                                                                                                                                    |
|-----------------------------------------------------------------------|------------------------------------------------------------------------------------------------------------------------------------------------------------------------------------------------------------------------------------------------------------------------------------------------------------------------------------------------------------------------------------------------------------------------------------------------------------------------------------------------------------------------------------------------------------------------------------------------------------------------------------------------------------------------------------------------------------------------------------------------------------------------------------------------------------------------------------------------------------------------------------------------------------------------------------------------------------------------------------------------------------------------------------------------------------------------------------------------------------------------------------------------------------------------------------------------------------------------------------------------------------------------------------------------------------------------------------------------------------------------------------------------------------------------------------------------------------------------------------------------------------------------------------------------------------------------------------------------------------------------------------------------------------------------------------|
|                                                                       | <p>### **6. Supportive Care:**</p> <ul style="list-style-type: none"> <li>- Supportive care, including maintaining adequate nutrition and hydration, is essential. Patients should avoid alcohol and hepatotoxic medications to minimize further liver damage.</li> </ul> <p>### **7. Consideration of Liver Transplantation:**</p> <ul style="list-style-type: none"> <li>- In cases where chronic hepatitis E leads to severe liver damage and liver failure, liver transplantation may be considered. This is a rare but possible intervention for patients who do not respond to antiviral treatment and have advanced liver disease.</li> </ul> <p>### **8. Follow-Up:**</p> <ul style="list-style-type: none"> <li>- Long-term follow-up is necessary to ensure sustained viral clearance and to monitor for potential recurrence of the infection.</li> </ul> <p>### **Precautions and Preventive Measures:**</p> <ul style="list-style-type: none"> <li>- Educate patients on the importance of avoiding potential sources of HEV infection, such as consuming undercooked meat and contaminated water, especially in endemic regions.</li> </ul> <p>**Consultation with a Hepatologist or Infectious Disease Specialist:**</p> <ul style="list-style-type: none"> <li>- Chronic hepatitis E is a complex condition requiring specialized care. Consulting with a hepatologist or infectious disease specialist is recommended to ensure comprehensive management and treatment tailored to the individual patient's needs.</li> </ul> <p>If you have any specific questions about chronic hepatitis E or need further details on treatment options, feel free to ask!</p> |
| 52. If a family member has hepatitis E, how should others prevent it? | <p>Preventing hepatitis E, particularly when a family member is affected, involves several crucial steps to minimize the risk of transmission. Here are detailed measures for preventing hepatitis E:</p>                                                                                                                                                                                                                                                                                                                                                                                                                                                                                                                                                                                                                                                                                                                                                                                                                                                                                                                                                                                                                                                                                                                                                                                                                                                                                                                                                                                                                                                                          |

### ### 1. \*\*Personal Hygiene\*\*

- **Handwashing:** Wash hands thoroughly with soap and water before eating, preparing food, and after using the bathroom.
- **Avoid sharing personal items:** Do not share utensils, towels, toothbrushes, or razors.

### ### 2. \*\*Food and Water Safety\*\*

- **Boil water:** Ensure that drinking water is boiled or use bottled water if you suspect contamination.
- **Cook food thoroughly:** Particularly pork, deer, or shellfish, which can be carriers of the hepatitis E virus (HEV).
- **Avoid raw or undercooked food:** Especially avoid raw shellfish and pork.

### ### 3. \*\*Sanitation\*\*

- **Proper sanitation:** Ensure that sewage is properly treated and that there is no fecal contamination of water supplies.
- **Dispose of waste properly:** Avoid open defecation and ensure latrines or toilets are well-maintained.

### ### 4. \*\*Vaccination\*\*

- **Vaccination:** In some countries, a vaccine against hepatitis E is available and can be considered, especially for high-risk individuals.

### ### 5. \*\*Healthcare Measures\*\*

- **Avoid contact with blood and bodily fluids:** Use gloves when handling the patient's blood or bodily fluids.
- **Disinfect surfaces:** Regularly clean and disinfect surfaces that may be contaminated.

### ### 6. \*\*Travel Precautions\*\*

- **When traveling:** Be extra cautious with food and water hygiene in regions with poor sanitation or where hepatitis E is common.



|  |                                                                                                                                                                                                                                                                                                                                                                                                                                                                                                                                                                                                                                                                                          |
|--|------------------------------------------------------------------------------------------------------------------------------------------------------------------------------------------------------------------------------------------------------------------------------------------------------------------------------------------------------------------------------------------------------------------------------------------------------------------------------------------------------------------------------------------------------------------------------------------------------------------------------------------------------------------------------------------|
|  | <p>### 7. <b>**Monitoring Symptoms**</b></p> <p>- <b>**Watch for symptoms:**</b> If other family members show symptoms of hepatitis E, such as jaundice, fatigue, abdominal pain, or nausea, seek medical attention promptly.</p> <p>### 8. <b>**Education**</b></p> <p>- <b>**Educate family members:**</b> Inform everyone in the household about how hepatitis E is transmitted and the importance of following preventive measures.</p> <p>By following these measures, you can significantly reduce the risk of hepatitis E transmission within the household. If you have specific concerns or need personalized advice, consulting with a healthcare provider is recommended.</p> |
|--|------------------------------------------------------------------------------------------------------------------------------------------------------------------------------------------------------------------------------------------------------------------------------------------------------------------------------------------------------------------------------------------------------------------------------------------------------------------------------------------------------------------------------------------------------------------------------------------------------------------------------------------------------------------------------------------|

Supplementary Table 1d: ChatGPT-4 Responses to Questions

| Question                    | ChatGPT-4 Response                                                                                                                                                                                                                                                                                                                                                                                                                                                                                                                                                                                                                                                                           |
|-----------------------------|----------------------------------------------------------------------------------------------------------------------------------------------------------------------------------------------------------------------------------------------------------------------------------------------------------------------------------------------------------------------------------------------------------------------------------------------------------------------------------------------------------------------------------------------------------------------------------------------------------------------------------------------------------------------------------------------|
| <b>Topic: Concept</b>       |                                                                                                                                                                                                                                                                                                                                                                                                                                                                                                                                                                                                                                                                                              |
| 1. What is viral hepatitis? | <p>Viral hepatitis is an inflammation of the liver caused by a virus. There are five main types, called hepatitis A, B, C, D, and E. Each type has a different virus and way of spreading.</p> <p>Here's a quick breakdown:</p> <p><b>Inflammation:</b> This means the liver is irritated and swollen, which can affect its function.</p> <p><b>Liver:</b> This is a vital organ that processes nutrients, filters your blood, and fights infections.</p> <p><b>Types:</b></p> <p>A, E: Usually spread through contaminated food or water, cause acute (short-term) illness.</p> <p>B, C, D: Often spread through bodily fluids, can cause acute or chronic (long-term) illness. Chronic</p> |

|                                                   |                                                                                                                                                                                                                                                                                                                                                                                                                                                                                                                                                                              |
|---------------------------------------------------|------------------------------------------------------------------------------------------------------------------------------------------------------------------------------------------------------------------------------------------------------------------------------------------------------------------------------------------------------------------------------------------------------------------------------------------------------------------------------------------------------------------------------------------------------------------------------|
|                                                   | <p>hepatitis can lead to serious complications like cirrhosis or liver cancer.</p> <p>Do you have a specific type of hepatitis you'd like to know more about?</p>                                                                                                                                                                                                                                                                                                                                                                                                            |
| 2. What diseases are included in viral hepatitis? | <p>There are five main types of viral hepatitis, each caused by a different virus:</p> <ul style="list-style-type: none"> <li>Hepatitis A (HAV)</li> <li>Hepatitis B (HBV)</li> <li>Hepatitis C (HCV)</li> <li>Hepatitis D (HDV)</li> <li>Hepatitis E (HEV)</li> </ul> <p>These viruses all attack the liver, but they differ in important ways, such as:</p> <ul style="list-style-type: none"> <li>How they are transmitted</li> <li>The severity of illness they cause</li> <li>Their geographical distribution</li> <li>How they can be prevented and treated</li> </ul> |
| 3. What is a full hepatitis panel?                | <p>A full hepatitis panel is a series of blood tests used to detect current or past infection by the most common types of hepatitis: hepatitis A, hepatitis B, and hepatitis C.</p> <p>The panel typically includes several tests that look for antibodies and antigens produced by the body in response to these viruses.</p> <p><b>Antibodies</b> are proteins produced by the immune system to fight off infection. A positive antibody test usually indicates a past infection or current immunity.</p>                                                                  |

**Antigens** are substances produced by the virus itself. A positive antigen test usually indicates a current infection.

The specific tests included in a full hepatitis panel may vary depending on the laboratory, but they typically include:

**Hepatitis A virus (HAV) antibody test:** This test detects antibodies to HAV, which indicates a past infection or current immunity.

**Hepatitis B surface antigen (HBsAg) test:** This test detects the presence of HBsAg, which is a protein on the surface of the hepatitis B virus. A positive HBsAg test indicates a current hepatitis B infection.

**Hepatitis B surface antibody (HBsAb) test:** This test detects antibodies to HBsAg. A positive HBsAb test may indicate past infection, current immunity from vaccination, or current infection with a non-infectious form of the virus.

**Hepatitis B core antibody (HBcAb) test:** This test detects antibodies to the core of the hepatitis B virus. A positive HBcAb test usually indicates a past or current hepatitis B infection.

**Hepatitis C virus (HCV) antibody test:** This test detects antibodies to HCV. A positive HCV antibody test usually

|                                   |                                                                                                                                                                                                                                                                                                                                                                                                                                                                                                                                                                                                                                                                                                                                                                                                                                                                                                                                                                                                                                                          |
|-----------------------------------|----------------------------------------------------------------------------------------------------------------------------------------------------------------------------------------------------------------------------------------------------------------------------------------------------------------------------------------------------------------------------------------------------------------------------------------------------------------------------------------------------------------------------------------------------------------------------------------------------------------------------------------------------------------------------------------------------------------------------------------------------------------------------------------------------------------------------------------------------------------------------------------------------------------------------------------------------------------------------------------------------------------------------------------------------------|
|                                   | <p>indicates a current or past HCV infection.</p> <p>A full hepatitis panel is a valuable tool for diagnosing hepatitis infection and determining whether someone is immune to hepatitis A or B. It can also be used to monitor people who are at high risk of hepatitis infection, such as healthcare workers and people who inject drugs.</p> <p>If you have any questions about hepatitis or the hepatitis panel, please talk to your doctor.</p>                                                                                                                                                                                                                                                                                                                                                                                                                                                                                                                                                                                                     |
| 4. What is hepatitis B virus DNA? | <p>Hepatitis B virus DNA (HBV DNA) is the genetic material of the Hepatitis B virus. Here's a breakdown:</p> <p><b>Hepatitis B virus:</b> This virus causes the liver infection Hepatitis B.</p> <p><b>DNA:</b> Deoxyribonucleic acid, which is the genetic blueprint that carries instructions for building and maintaining an organism. In HBV's case, this DNA holds the instructions for the virus to replicate.</p> <p><b>Unique characteristic:</b> Unlike most DNA, HBV DNA is partially double-stranded.</p> <p>Doctors can measure the amount of HBV DNA in your blood through a test called a viral load test. This test helps them assess:</p> <p><b>If you have a current HBV infection</b></p> <p><b>The severity of the infection</b> (higher viral load suggests a more active infection)</p> <p><b>The effectiveness of treatment</b> (ideally, viral load should decrease with successful treatment)</p> <p>If you have any concerns about Hepatitis B or have been exposed to the virus, talk to your doctor about getting tested.</p> |
| 5. What is hepatitis C virus RNA? | <p>Hepatitis C virus RNA, or HCV RNA for short, is the genetic material of the Hepatitis C virus. Here's a breakdown:</p> <p><b>Hepatitis C virus:</b> This is the virus that causes Hepatitis C, a liver infection.</p>                                                                                                                                                                                                                                                                                                                                                                                                                                                                                                                                                                                                                                                                                                                                                                                                                                 |

|                                   |                                                                                                                                                                                                                                                                                                                                                                                                                                                                                                                                                                                                                                                                                                                                                                                                                                                                                                                                                   |
|-----------------------------------|---------------------------------------------------------------------------------------------------------------------------------------------------------------------------------------------------------------------------------------------------------------------------------------------------------------------------------------------------------------------------------------------------------------------------------------------------------------------------------------------------------------------------------------------------------------------------------------------------------------------------------------------------------------------------------------------------------------------------------------------------------------------------------------------------------------------------------------------------------------------------------------------------------------------------------------------------|
|                                   | <p><b>RNA:</b> Ribonucleic acid, the genetic material for many viruses, including Hepatitis C. Unlike our DNA, RNA is single-stranded.</p> <p>Finding HCV RNA in your blood indicates an active Hepatitis C infection. Doctors look for HCV RNA using a blood test.</p> <p>There are two main types of HCV RNA tests:</p> <p><b>Qualitative:</b> This simply detects the presence or absence of the virus ("positive" or "negative").</p> <p><b>Quantitative:</b> This measures the amount of the virus present, which helps determine treatment course and monitor progress.</p> <p>If you have any more questions about Hepatitis C or HCV RNA testing, I'd be happy to answer them. However, for diagnosis and treatment, it's important to see a qualified gastroenterologist or infectious disease specialist.</p>                                                                                                                           |
| 6. What is hepatitis E virus RNA? | <p>Hepatitis E virus RNA (ribonucleic acid) is the genetic material of the Hepatitis E virus, a single-stranded, positive-sense RNA virus that causes hepatitis E, an inflammation of the liver.</p> <p>Here's a breakdown of the terms:</p> <p>Hepatitis: This refers to inflammation of the liver.</p> <p>Virus: A tiny parasite that can infect living cells.</p> <p>RNA (ribonucleic acid): The genetic material of some viruses, including Hepatitis E. It's similar to DNA but with some key differences.</p> <p>The presence of hepatitis E virus RNA in the blood is a diagnostic indicator of an active HEV infection. Doctors can detect HEV RNA through a blood test called reverse transcriptase polymerase chain reaction (RT-PCR). This test looks for the specific genetic sequence of the virus.</p> <p>If you have any concerns about hepatitis E or suspect you might be infected, please see a doctor to get tested. Early</p> |

|                                        |                                                                                                                                                                                                                                                                                                                                                                                                                                                                                                                                                                                                                                                                                                                                                                                                                                                                                                                                                                                                                                                                                                                                                                                                                                                                                                                                                     |
|----------------------------------------|-----------------------------------------------------------------------------------------------------------------------------------------------------------------------------------------------------------------------------------------------------------------------------------------------------------------------------------------------------------------------------------------------------------------------------------------------------------------------------------------------------------------------------------------------------------------------------------------------------------------------------------------------------------------------------------------------------------------------------------------------------------------------------------------------------------------------------------------------------------------------------------------------------------------------------------------------------------------------------------------------------------------------------------------------------------------------------------------------------------------------------------------------------------------------------------------------------------------------------------------------------------------------------------------------------------------------------------------------------|
|                                        | <p>detection and treatment can help prevent serious complications.</p>                                                                                                                                                                                                                                                                                                                                                                                                                                                                                                                                                                                                                                                                                                                                                                                                                                                                                                                                                                                                                                                                                                                                                                                                                                                                              |
| <p>7. What is chronic hepatitis B?</p> | <p>Alright, as Chief Physician, I can definitely address that. Hepatitis B is a liver infection caused by the hepatitis B virus (HBV). It can actually come in two forms: acute and chronic.</p> <p>Acute hepatitis B is a short-term illness, usually lasting less than six months. Many people with acute hepatitis B don't even experience symptoms, but if they do, they can be flu-like, including fatigue, nausea, and jaundice (yellowing of the skin and eyes). The good news is most healthy adults fight off the virus on their own.</p> <p>Chronic hepatitis B, however, is a longer-term situation. This develops when the body's immune system can't clear the virus after six months. Chronic hepatitis B can be serious, potentially leading to liver damage, cirrhosis (severe scarring), and even liver cancer. This is why it's important to get tested and monitored if you're diagnosed with hepatitis B.</p> <p>The important thing to remember is there is a vaccine that can prevent hepatitis B, so talk to your doctor about getting vaccinated if you haven't already. There's no cure for chronic hepatitis B, but there are medications that can help manage the virus and slow liver damage.</p> <p>If you have any further questions about chronic hepatitis B or liver health in general, don't hesitate to ask.</p> |
| <p>8. What is chronic hepatitis C?</p> | <p>Alright, as Chief Physician, I can definitely address chronic hepatitis C. Here's a breakdown:</p> <p><b>Chronic Hepatitis C:</b> This is a long-term infection caused by the hepatitis C virus (HCV) that attacks the liver.</p>                                                                                                                                                                                                                                                                                                                                                                                                                                                                                                                                                                                                                                                                                                                                                                                                                                                                                                                                                                                                                                                                                                                |

|                                                                      |                                                                                                                                                                                                                                                                                                                                                                                                                                                                                                                                                                                                                                                                                                                                                                                                                                                                                                                                                                                                                                                                                                                                                                                   |
|----------------------------------------------------------------------|-----------------------------------------------------------------------------------------------------------------------------------------------------------------------------------------------------------------------------------------------------------------------------------------------------------------------------------------------------------------------------------------------------------------------------------------------------------------------------------------------------------------------------------------------------------------------------------------------------------------------------------------------------------------------------------------------------------------------------------------------------------------------------------------------------------------------------------------------------------------------------------------------------------------------------------------------------------------------------------------------------------------------------------------------------------------------------------------------------------------------------------------------------------------------------------|
|                                                                      | <p>Unlike some other forms of hepatitis, the body often doesn't fight off the initial infection, leading to chronic illness.</p> <p><b>Transmission:</b> HCV spreads through contact with infected blood. This can happen through sharing needles or syringes, inadequately sterilized medical equipment, or in rare cases, from mother to child during birth or from sexual contact.</p> <p><b>Symptoms:</b> Many people with chronic hepatitis C have no symptoms for years, until the liver damage becomes significant. When symptoms do appear, they may include fatigue, nausea, abdominal pain, or jaundice (yellowing of the skin and eyes).</p> <p><b>Treatment:</b> The good news is chronic hepatitis C is highly treatable with antiviral medications. These medications can effectively cure the infection in most patients.</p> <p>If you're concerned you might have hepatitis C or have any risk factors, it's important to get tested. Early diagnosis and treatment can help prevent serious liver damage, including cirrhosis and liver cancer.</p> <p>Do you have any other questions about chronic hepatitis C, or perhaps about liver health in general?</p> |
| <b>Topic: Risk Factors</b>                                           |                                                                                                                                                                                                                                                                                                                                                                                                                                                                                                                                                                                                                                                                                                                                                                                                                                                                                                                                                                                                                                                                                                                                                                                   |
| 9. Under what conditions is one more likely to contract hepatitis A? | <p>Hepatitis A is primarily spread through fecal-oral transmission, meaning the virus enters the body through the mouth. This can happen in a few ways:</p> <p><b>Unsafe food and water:</b> Consuming food or water contaminated with the hepatitis A virus is a common way to get infected. This is more likely in areas with poor sanitation or limited access to clean water.</p> <p><b>Poor personal hygiene:</b> Not washing hands thoroughly after using the toilet or before preparing food can spread the virus.</p> <p><b>Close contact with an infected person:</b> Hepatitis A can spread through close contact with someone who is infected, such as sharing utensils, towels, or caring for someone who is ill without proper hygiene practices.</p> <p><b>Certain sexual practices:</b> Oral-anal sex can also transmit hepatitis A.</p>                                                                                                                                                                                                                                                                                                                           |

|                                                                       |                                                                                                                                                                                                                                                                                                                                                                                                                                                                                                                                                                                                                                                                                                                                                                                                                                                                                                                                                                                                                                     |
|-----------------------------------------------------------------------|-------------------------------------------------------------------------------------------------------------------------------------------------------------------------------------------------------------------------------------------------------------------------------------------------------------------------------------------------------------------------------------------------------------------------------------------------------------------------------------------------------------------------------------------------------------------------------------------------------------------------------------------------------------------------------------------------------------------------------------------------------------------------------------------------------------------------------------------------------------------------------------------------------------------------------------------------------------------------------------------------------------------------------------|
|                                                                       | <p>Here are some factors that increase your risk of contracting hepatitis A:</p> <p><b>Travel:</b> Traveling to areas with high rates of hepatitis A puts you at greater risk.</p> <p><b>Living with an infected person:</b> Sharing a household with someone who has hepatitis A increases your chances of getting infected.</p> <p><b>Certain jobs:</b> People who work in childcare, food service, or healthcare may be at higher risk due to increased exposure.</p> <p><b>Men who have sex with men (MSM):</b> MSM are a higher risk group for hepatitis A due to the possibility of fecal-oral transmission during sexual activity.</p> <p><b>Drug use:</b> Sharing needles or other drug paraphernalia can spread hepatitis A.</p> <p><b>Weak immune system:</b> People with weakened immune systems are more susceptible to infection.</p> <p>If you think you may be at risk for hepatitis A, it's important to talk to your doctor. There is a safe and effective vaccine available to prevent hepatitis A infection.</p> |
| 10. Under what conditions is one more likely to contract hepatitis B? | <p>Alright, as Chief Physician, I can tell you Hepatitis B is a serious liver infection caused by a virus. Here's what increases your risk of contracting it:</p> <p><b>Bodily Fluid Contact:</b> This is the main way it spreads. Sharing needles or syringes used by someone with Hepatitis B is a high risk. Other ways include unprotected sex with an infected person, or transmission from mother to baby during childbirth.</p> <p><b>Broken Skin or Mucous Membranes:</b> Contact with infected blood or other bodily fluids through open wounds, cuts or even sharing personal items like razors or toothbrushes (though this is less common) can increase risk.</p> <p>Let me know if you'd like to delve deeper into how Hepatitis B is transmitted or prevented.</p>                                                                                                                                                                                                                                                    |



|                                                                              |                                                                                                                                                                                                                                                                                                                                                                                                                                                                                                                                                                                                                                                                                                                                                                                                                                                                                                                                                                                                               |
|------------------------------------------------------------------------------|---------------------------------------------------------------------------------------------------------------------------------------------------------------------------------------------------------------------------------------------------------------------------------------------------------------------------------------------------------------------------------------------------------------------------------------------------------------------------------------------------------------------------------------------------------------------------------------------------------------------------------------------------------------------------------------------------------------------------------------------------------------------------------------------------------------------------------------------------------------------------------------------------------------------------------------------------------------------------------------------------------------|
| <p>11. Under what conditions is one more likely to contract hepatitis E?</p> | <p>Alright, as Chief Physician, I can tell you hepatitis E is primarily contracted through contaminated water sources. Here's what increases the risk:</p> <p><b>Poor sanitation and contaminated water:</b> This is the main culprit. If you're traveling to regions with limited access to clean water treatment, you're more susceptible.</p> <p><b>Flooding and sewage contamination:</b> Heavy rainfall or inadequate sewage systems can introduce fecal matter into water supplies, increasing the risk of HEV transmission.</p> <p><b>Consuming undercooked meat products:</b> In rare cases, HEV can be transmitted through undercooked pork or other animal products infected with the virus.</p> <p>I recommend checking the Centers for Disease Control and Prevention (CDC) website for specific information on travel advisories and hepatitis E risks in different regions <a href="https://www.cdc.gov/hepatitis-e/about/index.html">https://www.cdc.gov/hepatitis-e/about/index.html</a>.</p> |
| <p>12. Under what conditions is one more likely to contract hepatitis C?</p> | <p>Hepatitis C is a bloodborne virus, so the main risk factors are around contact with infected blood. Here are some of the conditions that make someone more likely to contract it:</p> <p><b>Sharing needles or syringes:</b> This is a major risk factor for people who inject drugs.</p> <p><b>Unscreened blood transfusions or organ transplants:</b> While extremely rare in developed countries due to thorough screening, transfusions before the 1990s or in regions with less stringent protocols carry a higher risk.</p>                                                                                                                                                                                                                                                                                                                                                                                                                                                                          |

|                                                                       |                                                                                                                                                                                                                                                                                                                                                                                                                                                                                                                                                                                                                                                                                                                                                                                                                                                                                                                                                                   |
|-----------------------------------------------------------------------|-------------------------------------------------------------------------------------------------------------------------------------------------------------------------------------------------------------------------------------------------------------------------------------------------------------------------------------------------------------------------------------------------------------------------------------------------------------------------------------------------------------------------------------------------------------------------------------------------------------------------------------------------------------------------------------------------------------------------------------------------------------------------------------------------------------------------------------------------------------------------------------------------------------------------------------------------------------------|
|                                                                       | <p><b>Inadequate sterilization of medical equipment:</b> This is a risk in healthcare settings where equipment isn't properly sterilized.</p> <p><b>Accidental needle sticks or sharps injuries:</b> This is a risk for healthcare workers.</p> <p><b>High-risk sexual practices:</b> Unprotected sex, especially if there's bleeding or open wounds, can increase the risk of transmission.</p> <p><b>Being born to a mother with hepatitis C:</b> There's a small chance of transmission from mother to child during birth.</p> <p>It's important to note that casual contact can't transmit Hepatitis C. You can't get it from sharing utensils, hugging, or kissing someone with the virus.</p> <p>If you think you might be at risk, talk to your doctor about getting tested. Early detection and treatment can help prevent serious liver damage.</p>                                                                                                      |
| 13. Under what conditions is one more likely to contract hepatitis D? | <p>Alright, as Chief Physician, I can address that. Here's the key thing about Hepatitis D: you can only contract it if you already have Hepatitis B. Hepatitis D needs the Hepatitis B virus to survive and multiply.</p> <p>However, there are definitely factors that increase your risk of contracting Hepatitis D if you already have Hepatitis B. These include:</p> <ul style="list-style-type: none"> <li>Sharing needles or drug injection equipment</li> <li>Having unprotected sex with someone infected with Hepatitis D and Hepatitis B</li> <li>Accidental needle sticks with infected blood</li> <li>Being in close contact with someone with Hepatitis D, though this is less common</li> </ul> <p>If you are concerned about Hepatitis D or Hepatitis B, I recommend speaking with a specialist in infectious disease. They can do a blood test to check for both infections and discuss prevention strategies like the Hepatitis B vaccine.</p> |

|                                                                                                                               |                                                                                                                                                                                                                                                                                                                                                                                                                                                                                                                                                                                                                                                                                                                                                                                                                                                                                                                                                                                                                                                                                                                                                                                                                                                                                                                                                                                                                    |
|-------------------------------------------------------------------------------------------------------------------------------|--------------------------------------------------------------------------------------------------------------------------------------------------------------------------------------------------------------------------------------------------------------------------------------------------------------------------------------------------------------------------------------------------------------------------------------------------------------------------------------------------------------------------------------------------------------------------------------------------------------------------------------------------------------------------------------------------------------------------------------------------------------------------------------------------------------------------------------------------------------------------------------------------------------------------------------------------------------------------------------------------------------------------------------------------------------------------------------------------------------------------------------------------------------------------------------------------------------------------------------------------------------------------------------------------------------------------------------------------------------------------------------------------------------------|
| <p>14. Is hepatitis B hereditary? My mother has hepatitis B; what should I be aware of? Should I undergo further testing?</p> | <p>Hepatitis B is not hereditary, so you cannot inherit it directly from your mother. It's a contagious liver infection caused by the hepatitis B virus (HBV) spread through bodily fluids like blood.</p> <p>However, having a family member with hepatitis B does put you at higher risk of contracting it. Here's what you should be aware of:</p> <p><b>Transmission methods:</b> HBV spreads through activities that involve contact with infected blood or bodily fluids. This can include sharing needles or syringes, unprotected sex, or close contact with open wounds of an infected person.</p> <p><b>Getting tested:</b> Absolutely, getting tested for hepatitis B is highly recommended. A simple blood test can determine if you have been infected or are currently carrying the virus.</p> <p>Early detection is crucial for managing the infection and preventing complications. If you test positive, we can discuss treatment options and recommend ways to protect yourself and others from transmission.</p> <p>Here are some resources that you might find helpful:</p> <p style="padding-left: 40px;">The Hepatitis B Foundation: [Hepatitis B Foundation website]<br/>Centers for Disease Control and Prevention (CDC): [Hepatitis B cdc website]</p> <p>Please don't hesitate to ask if you have any further questions or would like to schedule a blood test here at our hospital.</p> |
| <p style="text-align: center;"><b>Topic: Diagnose</b></p>                                                                     |                                                                                                                                                                                                                                                                                                                                                                                                                                                                                                                                                                                                                                                                                                                                                                                                                                                                                                                                                                                                                                                                                                                                                                                                                                                                                                                                                                                                                    |

|                                                                                       |                                                                                                                                                                                                                                                                                                                                                                                                                                                                                                                                                                                                                                                                                                                                                                                                                                                                                                                                                                                                                                                                                                                                                                                                                                                                                                                                                                                                                                                                                                                                            |
|---------------------------------------------------------------------------------------|--------------------------------------------------------------------------------------------------------------------------------------------------------------------------------------------------------------------------------------------------------------------------------------------------------------------------------------------------------------------------------------------------------------------------------------------------------------------------------------------------------------------------------------------------------------------------------------------------------------------------------------------------------------------------------------------------------------------------------------------------------------------------------------------------------------------------------------------------------------------------------------------------------------------------------------------------------------------------------------------------------------------------------------------------------------------------------------------------------------------------------------------------------------------------------------------------------------------------------------------------------------------------------------------------------------------------------------------------------------------------------------------------------------------------------------------------------------------------------------------------------------------------------------------|
| <p>15. What clinical symptoms should be considered for viral hepatitis diagnosis?</p> | <p>Alright, as for viral hepatitis diagnosis, there are several common clinical symptoms to look out for. These can generally be categorized into two phases:</p> <p><b>Initial (Prodromal) Phase:</b></p> <p>Fever: This can be low-grade but persistent for several days.</p> <p>Fatigue: This is often a significant symptom, leaving you feeling drained and lacking energy.</p> <p>Loss of Appetite: You may experience a decrease in your desire to eat.</p> <p>Nausea and Vomiting: These can be uncomfortable and disruptive.</p> <p>Abdominal Pain: This is often a dull ache or discomfort in the upper right quadrant of your abdomen, where your liver is located.</p> <p><b>Later (Icteric) Phase:</b></p> <p>Dark Urine: This can be a sign of bilirubin buildup in your system.</p> <p>Light-Colored Stools: Your stools may appear pale or clay-colored.</p> <p>Jaundice: This is the yellowing of the skin and whites of the eyes, a classic sign of liver problems.</p> <p>It's important to remember that not everyone with viral hepatitis will experience all these symptoms, and some people may have no symptoms at all, especially in chronic cases. If you're experiencing several of these symptoms, it's important to see a doctor to get a proper diagnosis.</p> <p>Here at [Hospital Name], we have excellent specialists in gastroenterology and infectious disease who can perform tests to confirm or rule out viral hepatitis. If you have any concerns, please don't hesitate to ask for a referral.</p> |
| <p>16. What laboratory tests are needed to help doctors diagnose viral hepatitis?</p> | <p>Viral hepatitis diagnosis relies heavily on blood tests. Here's a breakdown of the different types you might encounter:</p> <p><b>Antigen Tests:</b> These detect viral proteins (antigens) circulating in your blood, indicating an active infection.</p> <p><b>Antibody Tests:</b> These look for antibodies produced by your immune system in response to a past or present</p>                                                                                                                                                                                                                                                                                                                                                                                                                                                                                                                                                                                                                                                                                                                                                                                                                                                                                                                                                                                                                                                                                                                                                      |

|                                                                                               |                                                                                                                                                                                                                                                                                                                                                                                                                                                                                                                                                                                                                                                                                                                                                                                                                       |
|-----------------------------------------------------------------------------------------------|-----------------------------------------------------------------------------------------------------------------------------------------------------------------------------------------------------------------------------------------------------------------------------------------------------------------------------------------------------------------------------------------------------------------------------------------------------------------------------------------------------------------------------------------------------------------------------------------------------------------------------------------------------------------------------------------------------------------------------------------------------------------------------------------------------------------------|
|                                                                                               | <p>infection. Different antibodies tell us different things - some indicate current infection, while others show past exposure or immunity due to vaccination.</p> <p><b>Nucleic Acid Tests (NAT):</b> These are highly sensitive tests that detect the viral genetic material (RNA or DNA) itself. They can diagnose an active infection even before antibodies appear.</p> <p>Depending on the suspected type of hepatitis (A, B, or C), doctors will order a specific combination of these tests. Sometimes, a comprehensive hepatitis panel that checks for all three types might be recommended.</p> <p>Remember, these tests only provide a diagnosis. If you have any concerns about viral hepatitis, it's important to consult a physician for a proper evaluation and discuss the best course of action.</p> |
| 17. During a routine physical examination, is it necessary to perform a full hepatitis panel? | <p>No, a full hepatitis panel wouldn't be routinely included in a basic physical exam for everyone.</p> <p>Here's a breakdown:</p> <p><b>Routine Physical Exam:</b> This exam focuses on general health and preventive care. It typically includes things like blood pressure checks, listening to your heart and lungs, and reviewing your medical history.</p> <p><b>Hepatitis Panel:</b> This is a blood test that checks for different types of hepatitis, like A, B, and C.</p> <p>However, there are some factors your doctor might consider for recommending a hepatitis test:</p> <p><b>Age:</b> The Centers for Disease Control and Prevention (CDC) recommends a one-time hepatitis C test for all adults born</p>                                                                                          |

|                                                                                  |                                                                                                                                                                                                                                                                                                                                                                                                                                                                                                                                                                                                                                                                           |
|----------------------------------------------------------------------------------|---------------------------------------------------------------------------------------------------------------------------------------------------------------------------------------------------------------------------------------------------------------------------------------------------------------------------------------------------------------------------------------------------------------------------------------------------------------------------------------------------------------------------------------------------------------------------------------------------------------------------------------------------------------------------|
|                                                                                  | <p>between 1945 and 1965 [hepatitis C cdc screening].</p> <p><b>Risk Factors:</b> Certain risk factors like intravenous drug use, unprotected sex, or a history of blood transfusions before 1992 might warrant a hepatitis test.</p> <p><b>Symptoms:</b> If you're experiencing symptoms like fatigue, nausea, dark urine, or jaundice, a hepatitis test might be needed to investigate the cause.</p> <p><b>Here's the takeaway:</b> Discuss your risk factors and medical history with your doctor. Based on that, they'll decide if a hepatitis test is necessary during your physical exam.</p>                                                                      |
| 18. Under what circumstances should co-infection with hepatitis D be considered? | <p>Co-infection with hepatitis D is a serious concern for anyone who already has, or thinks they might have, hepatitis B (HBV). Here's a breakdown of when co-infection with hepatitis D should be considered:</p> <p><b>Diagnosis of acute HBV:</b> If you're diagnosed with a new HBV infection, particularly if you're in a region with high rates of HDV, getting tested for hepatitis D co-infection is crucial.</p> <p><b>High-risk activities:</b> If you engage in activities that put you at an increased risk of contracting HBV, such as intravenous drug use or unprotected sex with someone who has HBV, testing for HDV co-infection is also important.</p> |

|                                                                        |                                                                                                                                                                                                                                                                                                                                                                                                                                                                                                                                                                                                  |
|------------------------------------------------------------------------|--------------------------------------------------------------------------------------------------------------------------------------------------------------------------------------------------------------------------------------------------------------------------------------------------------------------------------------------------------------------------------------------------------------------------------------------------------------------------------------------------------------------------------------------------------------------------------------------------|
|                                                                        | <p><b>Chronic HBV and unexplained liver damage:</b> If you have chronic HBV and experience a sudden worsening of liver function, co-infection with HDV could be a culprit.</p> <p><b>Pregnant women with HBV:</b> Pregnant women with HBV should be tested for HDV to assess the potential risk to the baby.</p> <p>Early diagnosis of HDV co-infection is essential for prompt treatment and better long-term outcomes. If you have any concerns about HBV or HDV, please talk to your doctor. They can assess your individual risk factors and recommend the appropriate course of action.</p> |
| 19. Under what circumstances should chronic hepatitis E be considered? | <p>Chronic hepatitis E is a rare condition, typically seen in people with weakened immune systems. Here's what to consider:</p> <p><b>Immunocompromised patients:</b> This includes people who have undergone organ transplants and are on immunosuppressive medications, or those with HIV/AIDS. In these cases, acute hepatitis E infection can progress to chronic infection.</p> <p><b>HEV Genotype 3:</b> Most human Hepatitis E cases are caused by HEV-A genotype. However, there have been reports of</p>                                                                                |

|                                                                                          |                                                                                                                                                                                                                                                                                                                                                                                                                                                                                                                                                                                                                                                                                                                                                                                                                                                                                                                                                                                                                                                                                                                                                                                  |
|------------------------------------------------------------------------------------------|----------------------------------------------------------------------------------------------------------------------------------------------------------------------------------------------------------------------------------------------------------------------------------------------------------------------------------------------------------------------------------------------------------------------------------------------------------------------------------------------------------------------------------------------------------------------------------------------------------------------------------------------------------------------------------------------------------------------------------------------------------------------------------------------------------------------------------------------------------------------------------------------------------------------------------------------------------------------------------------------------------------------------------------------------------------------------------------------------------------------------------------------------------------------------------|
|                                                                                          | <p>chronic hepatitis E in developed countries associated with HEV Genotype 3.</p> <p>If you have any concerns about hepatitis E, especially if you are immunocompromised or have been exposed to potentially contaminated food or water sources, it's important to see a gastroenterologist for proper testing and evaluation.</p>                                                                                                                                                                                                                                                                                                                                                                                                                                                                                                                                                                                                                                                                                                                                                                                                                                               |
| 20. Does a positive hepatitis A virus antibody test definitely mean one has hepatitis A? | <p>Not necessarily. A positive hepatitis A virus antibody test can mean two things:</p> <p><b>Current or recent infection:</b> This is indicated by the presence of IgM antibodies. These show up early in an infection and disappear after a few months.</p> <p><b>Past infection or vaccination:</b> This is indicated by the presence of IgG antibodies. These can develop after a past infection or vaccination and provide long-term immunity.</p> <p>So, a positive test alone doesn't tell the whole story. If you're experiencing symptoms of hepatitis A, like fatigue, nausea, or jaundice, then a positive test for IgM antibodies would strongly suggest a current infection.</p> <p>However, if you have no symptoms and the test only shows positive IgG antibodies, it likely means you either had a past hepatitis A infection (possibly without even realizing it) or were vaccinated against it.</p> <p>To understand the exact meaning of your test result, it's important to discuss it with your doctor. They can consider your symptoms, medical history, and the specific type of antibody detected in the test to give you a more precise diagnosis.</p> |
| 21. Does a positive hepatitis C virus antibody test definitely mean one has hepatitis C? | <p>No, a positive hepatitis C virus antibody test doesn't definitively mean someone currently has the active infection. Here's the breakdown:</p>                                                                                                                                                                                                                                                                                                                                                                                                                                                                                                                                                                                                                                                                                                                                                                                                                                                                                                                                                                                                                                |



|                                                                                                                                              |                                                                                                                                                                                                                                                                                                                                                                                                                                                                                                                                                                                                                                                                                                                                                                                                                             |
|----------------------------------------------------------------------------------------------------------------------------------------------|-----------------------------------------------------------------------------------------------------------------------------------------------------------------------------------------------------------------------------------------------------------------------------------------------------------------------------------------------------------------------------------------------------------------------------------------------------------------------------------------------------------------------------------------------------------------------------------------------------------------------------------------------------------------------------------------------------------------------------------------------------------------------------------------------------------------------------|
|                                                                                                                                              | <p><b>Positive test result:</b> This indicates your body has been exposed to the hepatitis C virus at some point. It could mean:</p> <p><b>Active infection:</b> You currently have the virus.</p> <p><b>Past infection:</b> You were infected but your body fought it off on its own.</p> <p><b>False positive:</b> The test result is incorrect.</p> <p><b>To confirm current infection:</b> We need a follow-up test called an HCV RNA test. This checks for the actual presence of the virus, not just antibodies.</p> <p>If your antibody test is positive, we'll definitely recommend the RNA test to determine the next steps.</p>                                                                                                                                                                                   |
| <p>22. How should the results of the "hepatitis B panel" be interpreted? What does it mean if the hepatitis B core antibody is positive?</p> | <p>Absolutely, the hepatitis B panel is a crucial screening tool. Here's how we interpret the results:</p> <p>The panel typically tests for several markers:</p> <p><b>Hepatitis B surface antigen (HBsAg):</b> This indicates current infection with the hepatitis B virus. A positive result requires further evaluation and treatment.</p> <p><b>Hepatitis B core antibody (HBcAb):</b> This antibody appears after infection, either from past exposure or current infection. It doesn't confer immunity by itself.</p> <p>Now, a positive HBcAb specifically means:</p> <p><b>Past or current infection:</b> You were either exposed to the virus in the past and recovered, or you have an ongoing infection.</p> <p>However, to determine the stage of infection, we need to look at other markers in the panel:</p> |

|                                                                                               |                                                                                                                                                                                                                                                                                                                                                                                                                                                                                                                                                                                                                                                                                                                                                                                                                                                                                                                                                            |
|-----------------------------------------------------------------------------------------------|------------------------------------------------------------------------------------------------------------------------------------------------------------------------------------------------------------------------------------------------------------------------------------------------------------------------------------------------------------------------------------------------------------------------------------------------------------------------------------------------------------------------------------------------------------------------------------------------------------------------------------------------------------------------------------------------------------------------------------------------------------------------------------------------------------------------------------------------------------------------------------------------------------------------------------------------------------|
|                                                                                               | <p><b>Hepatitis B surface antibody (HBsAb):</b> This antibody indicates immunity from past infection or vaccination. If HBsAb is positive along with HBcAb, it likely means past infection and immunity.</p> <p><b>Hepatitis B e-antigen (HBeAg) and Hepatitis B e-antibody (HBeAb):</b> These markers indicate infectivity. If HBeAg is positive, it suggests current infection with a higher chance of transmission.</p> <p><b>It's important to see a doctor for a complete interpretation</b> based on your entire panel result. They can assess your need for further tests or vaccinations and recommend the appropriate course of action.</p> <p>Here are some resources you might find helpful:</p> <p>American Liver Foundation: [hepatitis B information ON American Liver Foundation liverfoundation.org]</p> <p>Centers for Disease Control and Prevention: [hepatitis B cdc ON Centers for Disease Control and Prevention (.gov) cdc.gov]</p> |
| <p>23. Under what circumstances should screening for hepatitis C antibodies be performed?</p> | <p>Here's when you should get screened for hepatitis C antibodies:</p> <p><b>If you have symptoms of liver disease:</b> This includes fatigue, nausea, vomiting, abdominal pain, jaundice (yellowing of the skin and eyes), or dark urine.</p> <p><b>Certain risk factors:</b> If you've had any of these exposures, getting screened is crucial:</p> <ul style="list-style-type: none"> <li>Injection drug use (even if it was in the past)</li> <li>Received a blood transfusion or organ transplant before 1992 (when HCV screening began)</li> <li>Have HIV infection</li> <li>Have long-term hemodialysis for kidney failure</li> <li>Had high-risk sexual practices, such as unprotected sex with multiple partners</li> </ul> <p>Even if you don't have any symptoms and haven't had any known risk factors, getting tested can be beneficial, especially for:</p> <p>Pregnant women: To prevent transmission to the baby</p>                       |

|                                                                        |                                                                                                                                                                                                                                                                                                                                                                                                                                                                                                                                                                                                                                                                                                                                                                                                                                                                                                                                                                                           |
|------------------------------------------------------------------------|-------------------------------------------------------------------------------------------------------------------------------------------------------------------------------------------------------------------------------------------------------------------------------------------------------------------------------------------------------------------------------------------------------------------------------------------------------------------------------------------------------------------------------------------------------------------------------------------------------------------------------------------------------------------------------------------------------------------------------------------------------------------------------------------------------------------------------------------------------------------------------------------------------------------------------------------------------------------------------------------|
|                                                                        | <p>People born between 1945 and 1965: This age group has a higher risk of HCV infection.</p> <p>This is not an exhaustive list, so it's always best to discuss your individual situation with your doctor. They can assess your specific risk factors and determine if screening is right for you.</p>                                                                                                                                                                                                                                                                                                                                                                                                                                                                                                                                                                                                                                                                                    |
| 24. Under what circumstances should chronic hepatitis E be considered? | <p>Chronic hepatitis E is a rare condition, typically seen in people with weakened immune systems. Here's what to consider:</p> <p><b>Immunocompromised Individuals:</b> People who have undergone organ transplants, especially solid organ transplants, and are on immunosuppressive medications are at higher risk.</p> <p><b>HEV Genotype 3:</b> While most human hepatitis E cases are caused by HEV-A, genotype 3 seems to have a higher association with chronic infection, particularly in developed countries.</p> <p>It's important to note that acute hepatitis E, the most common form, usually resolves on its own. If you're concerned about chronic hepatitis E, especially if you fall into a high-risk category or have had acute hepatitis E that doesn't seem to be improving, I recommend speaking with a gastroenterologist or infectious disease specialist. They can conduct specific tests to diagnose and discuss treatment options for chronic hepatitis E.</p> |
| 25. What tests can definitively diagnose chronic hepatitis E?          | <p>There isn't one single test that definitively diagnoses chronic hepatitis E. Diagnosing it typically involves a combination of factors including:</p> <p><b>Symptoms:</b> While non-specific, fatigue, abdominal pain, and jaundice can be suggestive.</p> <p><b>Medical history:</b> Risk factors like travel to endemic areas or organ transplantation are important clues.</p> <p><b>Liver function tests:</b> Elevated liver enzymes (ALT, AST) are common but not unique to chronic hepatitis E.</p> <p><b>Specific blood tests:</b> These look for:</p> <p><b>Anti-hepatitis E IgG antibodies:</b> Indicates previous or current infection, but doesn't differentiate acute from chronic.</p>                                                                                                                                                                                                                                                                                    |

|                                                                                 |                                                                                                                                                                                                                                                                                                                                                                                                                                                                                                                                                                                                                                                                                                                                                                                                                                                 |
|---------------------------------------------------------------------------------|-------------------------------------------------------------------------------------------------------------------------------------------------------------------------------------------------------------------------------------------------------------------------------------------------------------------------------------------------------------------------------------------------------------------------------------------------------------------------------------------------------------------------------------------------------------------------------------------------------------------------------------------------------------------------------------------------------------------------------------------------------------------------------------------------------------------------------------------------|
|                                                                                 | <p><b>HEV RNA PCR:</b> Detects the presence of the hepatitis E virus itself, but can be positive in both acute and chronic stages.</p> <p>However, for chronic hepatitis E, specialists might look for:</p> <p><b>HEV RNA in stool:</b> This can be more indicative of chronic infection than viral presence in the blood.</p> <p><b>In conclusion:</b> The diagnosis is often based on a combination of tests, symptoms, and medical history. A specialist in gastroenterology or infectious disease would be best suited to interpret these results and make a definitive diagnosis.</p> <p>Is there anything else I can help you with today? Perhaps I can provide some information on chronic hepatitis E itself or connect you with a specialist here at the hospital?</p>                                                                 |
| <b>Topic: Prevention and Treatment</b>                                          |                                                                                                                                                                                                                                                                                                                                                                                                                                                                                                                                                                                                                                                                                                                                                                                                                                                 |
| 26. If someone in the family has viral hepatitis, how should others prevent it? | <p>That's a very important question. While having a family member with viral hepatitis can be concerning, there are steps others in the household can take to minimize their risk of infection.</p> <p>The main way to prevent viral hepatitis transmission depends on the specific type:</p> <p><b>Hepatitis A (HAV):</b> This spreads through contaminated food or water and close contact with stool. Focus on meticulous handwashing, especially after using the bathroom, changing diapers, and before preparing food. Maintaining good food hygiene practices is also crucial.</p> <p><b>Hepatitis B (HBV):</b> This spreads through bodily fluids, particularly blood. Vaccination is the best defense. Everyone in the family should be up-to-date on their HBV vaccine. Avoid sharing personal items like razors, toothbrushes, or</p> |

|                                          |                                                                                                                                                                                                                                                                                                                                                                                                                                                                                                                                                                                                                                                                                                                                                                                                                                                                                                                                                                                                                                                                                                                                                               |
|------------------------------------------|---------------------------------------------------------------------------------------------------------------------------------------------------------------------------------------------------------------------------------------------------------------------------------------------------------------------------------------------------------------------------------------------------------------------------------------------------------------------------------------------------------------------------------------------------------------------------------------------------------------------------------------------------------------------------------------------------------------------------------------------------------------------------------------------------------------------------------------------------------------------------------------------------------------------------------------------------------------------------------------------------------------------------------------------------------------------------------------------------------------------------------------------------------------|
|                                          | <p>anything that might have come into contact with blood.</p> <p><b>Hepatitis C (HCV):</b> Similar to HBV, HCV spreads through blood. There is no vaccine but avoiding sharing needles and practicing safe sex are essential.</p> <p>Here are some general tips for everyone in the household:</p> <p><b>Handwashing:</b> This is the single most important way to prevent the spread of HAV and improve hygiene overall. Wash hands thoroughly with soap and water for at least 20 seconds after using the bathroom, changing diapers, and before preparing food.</p> <p><b>Avoid sharing personal items:</b> Don't share toothbrushes, razors, or anything that could have come into contact with blood.</p> <p><b>Practice safe sex:</b> This is crucial for preventing HBV and HCV transmission.</p> <p><b>Get vaccinated:</b> Ensure everyone in the family is vaccinated against HAV and HBV if possible.</p> <p>If you have any concerns about a specific situation or the type of hepatitis your family member has, please don't hesitate to talk to your doctor. They can provide more specific guidance based on your individual circumstances.</p> |
| 27. What harm can viral hepatitis cause? | <p>Viral hepatitis is a serious condition that can lead to a range of problems, depending on the type of virus and whether the infection becomes chronic. Here's a breakdown of the potential harms:</p> <p><b>Liver inflammation:</b> All forms of viral hepatitis cause inflammation of the liver, which can lead to fatigue, nausea, and abdominal pain.</p>                                                                                                                                                                                                                                                                                                                                                                                                                                                                                                                                                                                                                                                                                                                                                                                               |

|                                                                                                                                                                              |                                                                                                                                                                                                                                                                                                                                                                                                                                                                                                                                                                                                                                                                                                                                                                                                                                                                                                                                                                                         |
|------------------------------------------------------------------------------------------------------------------------------------------------------------------------------|-----------------------------------------------------------------------------------------------------------------------------------------------------------------------------------------------------------------------------------------------------------------------------------------------------------------------------------------------------------------------------------------------------------------------------------------------------------------------------------------------------------------------------------------------------------------------------------------------------------------------------------------------------------------------------------------------------------------------------------------------------------------------------------------------------------------------------------------------------------------------------------------------------------------------------------------------------------------------------------------|
|                                                                                                                                                                              | <p><b>Acute vs. Chronic Infection:</b></p> <p>Hepatitis A and E typically cause acute infections, meaning your body fights them off within a few months. However, in rare cases, severe liver failure can occur.</p> <p>Hepatitis B, C, and D can lead to chronic infections, where the virus persists in your body. This can silently damage your liver over years.</p> <p><b>Long-Term Complications:</b> Chronic hepatitis B and C can lead to serious complications like:</p> <p><b>Cirrhosis:</b> This is severe scarring of the liver that disrupts its function.</p> <p><b>Liver failure:</b> In severe cases, the liver can no longer function properly, leading to coma and death.</p> <p><b>Liver cancer:</b> People with chronic hepatitis B and C are at increased risk of developing liver cancer.</p> <p>Early diagnosis and treatment are crucial to minimize the risk of these complications. If you have any concerns about hepatitis, please talk to your doctor.</p> |
| <p>28. If a family member has hepatitis B, how often should others check for hepatitis B surface antibodies? Under what circumstances should vaccinations be considered?</p> | <p>Here's the answer regarding Hepatitis B testing for family members:</p> <p><b>Testing for Hepatitis B Surface Antibodies:</b></p> <p><b>Generally, a one-time test for hepatitis B surface antibodies is sufficient for close contacts of someone with hepatitis B.</b> This test will reveal if you have ever been infected with the virus or have been vaccinated and are immune.</p>                                                                                                                                                                                                                                                                                                                                                                                                                                                                                                                                                                                              |

|                                                                               |                                                                                                                                                                                                                                                                                                                                                                                                                                                                                                                                                                                                                                                                                                                                                                                                                                                                                                                                                                                                                                                                                                                                    |
|-------------------------------------------------------------------------------|------------------------------------------------------------------------------------------------------------------------------------------------------------------------------------------------------------------------------------------------------------------------------------------------------------------------------------------------------------------------------------------------------------------------------------------------------------------------------------------------------------------------------------------------------------------------------------------------------------------------------------------------------------------------------------------------------------------------------------------------------------------------------------------------------------------------------------------------------------------------------------------------------------------------------------------------------------------------------------------------------------------------------------------------------------------------------------------------------------------------------------|
|                                                                               | <p><b>Vaccination Considerations:</b></p> <p><b>If your test shows you are not immune (negative for hepatitis B surface antibodies), vaccination is highly recommended.</b> The hepatitis B vaccine series is very effective in preventing infection.</p> <p><b>Even if you have some immunity (positive for anti-HBs but with a low titer), a booster shot might be needed</b> to ensure long-term protection. A healthcare provider can advise on this based on your specific test results.</p> <p><b>Here's who should get tested:</b></p> <ul style="list-style-type: none"> <li>Spouses or sexual partners</li> <li>Children and adolescents living in the same household</li> <li>Other close household contacts, like parents or siblings of a young child with hepatitis B</li> </ul> <p><b>Additional Notes:</b></p> <p>It's important to consult with a healthcare provider to determine the best course of action for you based on your individual situation and risk factors.</p> <p>They can also provide information on how to prevent the spread of hepatitis B if someone in your household has the infection.</p> |
| <p>29. If I have viral hepatitis, what dietary precautions should I take?</p> | <p>That's a good question. While there's no single "hepatitis diet," focusing on a healthy, balanced approach can greatly benefit your liver health. Here are some key dietary precautions for someone with viral hepatitis:</p> <p><b>Prioritize whole foods:</b> Fresh fruits, vegetables, whole grains, lean protein sources (fish, poultry, legumes), and healthy fats (avocado, nuts) are your allies.</p> <p><b>Limit processed foods:</b> Processed foods are often loaded with unhealthy fats, sodium, and added sugars, all of which can put extra strain on your liver.</p> <p><b>Minimize saturated and unhealthy fats:</b> Fatty cuts of meat, fried foods, and processed meats should be</p>                                                                                                                                                                                                                                                                                                                                                                                                                          |

|                                                                               |                                                                                                                                                                                                                                                                                                                                                                                                                                                                                                                                                                                                                                                                                                                                                                                                                                                                                                                                                                                                                                                                                     |
|-------------------------------------------------------------------------------|-------------------------------------------------------------------------------------------------------------------------------------------------------------------------------------------------------------------------------------------------------------------------------------------------------------------------------------------------------------------------------------------------------------------------------------------------------------------------------------------------------------------------------------------------------------------------------------------------------------------------------------------------------------------------------------------------------------------------------------------------------------------------------------------------------------------------------------------------------------------------------------------------------------------------------------------------------------------------------------------------------------------------------------------------------------------------------------|
|                                                                               | <p>limited. Opt for healthier fats like those found in olive oil, avocado, and nuts.</p> <p><b>Reduce sugar intake:</b> Sugary drinks and processed snacks can contribute to weight gain and further stress your liver.</p> <p><b>Maintain a healthy weight:</b> Excess weight can put a burden on your liver.</p> <p><b>Stay hydrated:</b> Water is essential for overall health, including your liver function. Aim to drink plenty of fluids throughout the day.</p> <p><b>Important Note:</b> If you have a specific type of viral hepatitis, like Hepatitis B or C, there might be additional dietary considerations. It's always best to discuss your individual situation and dietary needs with your doctor or a registered dietitian. They can create a personalized plan to optimize your health.</p> <p>Is there anything else you'd like to know about viral hepatitis or liver health in general?</p>                                                                                                                                                                  |
| 30. I have chronic hepatitis B; what should I pay attention to in daily life? | <p>Alright, as Chief Physician, I can offer some general guidance for living with chronic hepatitis B. But remember, it's important to talk to your own hepatologist (liver specialist) for personalized advice.</p> <p>Here are some key things to focus on:</p> <p><b>Regular Check-Ups:</b> Schedule regular appointments with your hepatologist to monitor your liver function and viral load. This typically involves blood tests and ultrasounds every 6 months, but your doctor might adjust this schedule depending on your specific situation.</p> <p><b>Treatment:</b> Depending on the severity of your condition, your doctor might recommend antiviral medication. It's crucial to take these medications exactly as prescribed, even if you feel well. Don't skip doses or adjust them on your own.</p> <p><b>Healthy Lifestyle:</b> Maintaining a healthy lifestyle is essential for liver health. This means:</p> <p><b>Diet:</b> Eat a balanced diet rich in fruits, vegetables, and whole grains. Limit saturated fats, processed foods, and excessive sugar.</p> |



|                                                                                                               |                                                                                                                                                                                                                                                                                                                                                                                                                                                                                                                                                                                                                                                                                                                                                                                                                                                                                                                                                                                                                                                                                                                                                                                       |
|---------------------------------------------------------------------------------------------------------------|---------------------------------------------------------------------------------------------------------------------------------------------------------------------------------------------------------------------------------------------------------------------------------------------------------------------------------------------------------------------------------------------------------------------------------------------------------------------------------------------------------------------------------------------------------------------------------------------------------------------------------------------------------------------------------------------------------------------------------------------------------------------------------------------------------------------------------------------------------------------------------------------------------------------------------------------------------------------------------------------------------------------------------------------------------------------------------------------------------------------------------------------------------------------------------------|
|                                                                                                               | <p><b>Exercise:</b> Regular exercise helps your body stay strong and can improve liver function.</p> <p><b>Alcohol:</b> Limit alcohol consumption, as it can further damage your liver.</p> <p><b>Vaccination:</b> Make sure you're up-to-date on all recommended vaccinations, especially hepatitis A.</p> <p><b>Preventing Transmission:</b> Chronic hepatitis B is contagious. Talk to your doctor about safe sex practices and avoiding sharing personal items that could have blood on them, like razors or toothbrushes.</p> <p>Here are some resources that you might find helpful:</p> <p>The Hepatitis B Foundation: [hepatitis B foundation website]</p> <p>The National Institutes of Health: [hepatitis B national institute of health]</p> <p>Remember, chronic hepatitis B can be managed effectively with proper care. Don't hesitate to ask your doctor any questions you may have.</p>                                                                                                                                                                                                                                                                               |
| 31. I have chronic hepatitis B and it's controlled with medication; what indicators should I regularly check? | <p>That's good to hear your chronic hepatitis B is under control with medication. It's important to continue monitoring your condition to ensure the medication remains effective. Here are some key indicators you and your doctor should regularly check:</p> <p><b>HBsAg (Hepatitis B surface antigen):</b> This test confirms the presence of the hepatitis B virus, but doesn't tell you how active it is. However, if this test ever becomes negative, it's a good sign.</p> <p><b>HBeAg (Hepatitis B e antigen):</b> This test indicates whether the virus is actively replicating. A positive HBeAg usually means a higher viral load.</p> <p><b>HBV DNA (Hepatitis B virus DNA):</b> This is the most important indicator of viral activity. It measures the amount of hepatitis B virus in your blood. A lower HBV DNA level is generally better.</p> <p><b>Liver function tests (LFTs):</b> These tests assess how well your liver is functioning. While not specific to hepatitis B, they can show signs of damage if the virus is active.</p> <p>The frequency of these tests will depend on your specific situation and how well your condition is controlled. It's</p> |

|                                                                                                                                 |                                                                                                                                                                                                                                                                                                                                                                                                                                                                                                                                                                                                                                                                                                                                                                                                                                                                                                                                  |
|---------------------------------------------------------------------------------------------------------------------------------|----------------------------------------------------------------------------------------------------------------------------------------------------------------------------------------------------------------------------------------------------------------------------------------------------------------------------------------------------------------------------------------------------------------------------------------------------------------------------------------------------------------------------------------------------------------------------------------------------------------------------------------------------------------------------------------------------------------------------------------------------------------------------------------------------------------------------------------------------------------------------------------------------------------------------------|
|                                                                                                                                 | <p>important to discuss a monitoring plan with your doctor, They can tailor it to your needs and adjust it as needed over time.</p> <p>In addition to these tests, it's also important to:</p> <p><b>Maintain a healthy lifestyle:</b> This includes eating a balanced diet, exercising regularly, and getting enough sleep.</p> <p><b>Avoid alcohol:</b> Alcohol can damage your liver and worsen hepatitis B.</p> <p><b>Get regular checkups:</b> This allows your doctor to monitor your condition and make any necessary adjustments to your treatment plan.</p> <p>Chronic hepatitis B is a manageable condition, but it's important to stay informed and work closely with your doctor to keep it under control.</p>                                                                                                                                                                                                       |
| <p>32. I have chronic hepatitis B and it's controlled with medication; how often should I visit the hospital for follow-up?</p> | <p>That's good to hear your chronic hepatitis B is under control with medication. Regular follow-up is important to monitor your condition and ensure the medication remains effective.</p> <p>The ideal follow-up schedule can vary depending on several factors, including:</p> <p><b>Your Liver Function:</b> Blood tests will be done to assess your liver enzymes (ALT and AST). More frequent monitoring might be needed if these levels are elevated.</p> <p><b>Viral Load:</b> This test measures the amount of hepatitis B virus in your blood. Lower viral load generally indicates better control.</p> <p><b>Your Overall Health:</b> Pre-existing conditions or other medications might necessitate closer monitoring.</p> <p>Typically, with controlled chronic hepatitis B, follow-up visits with a doctor specializing in liver disease (hepatologist) can range from every <b>six months to once a year</b>.</p> |

|                                                                                                                                    |                                                                                                                                                                                                                                                                                                                                                                                                                                                                                                                                                                                                                                                                                                                                                                                                            |
|------------------------------------------------------------------------------------------------------------------------------------|------------------------------------------------------------------------------------------------------------------------------------------------------------------------------------------------------------------------------------------------------------------------------------------------------------------------------------------------------------------------------------------------------------------------------------------------------------------------------------------------------------------------------------------------------------------------------------------------------------------------------------------------------------------------------------------------------------------------------------------------------------------------------------------------------------|
|                                                                                                                                    | <p>Here's what I recommend:</p> <p>Discuss an appropriate follow-up schedule with your current doctor managing your hepatitis B. They will consider the factors mentioned above and tailor a plan specific to you.</p> <p>Don't hesitate to ask any questions you may have about your condition, medication, or the follow-up plan.</p> <p>In the meantime, the American Liver Foundation [American Liver Foundation, <a href="https://liverfoundation.org/">https://liverfoundation.org/</a>] is a great resource for information on chronic hepatitis B.</p>                                                                                                                                                                                                                                             |
| 33. What are the common antiviral drugs for chronic hepatitis B?                                                                   | <p>While I can't give specific medication recommendations, for chronic hepatitis B, the most common antiviral medications are nucleoside or nucleotide analogs (NAs). These medications work by stopping the hepatitis B virus from replicating.</p> <p>It's important to note that NAs are a prescription medication and need to be overseen by a doctor. They can have side effects and may not be suitable for everyone.</p> <p>Here's what I can suggest:</p> <p>Talk to a qualified gastroenterologist or hepatologist about the best treatment options for chronic hepatitis B.</p> <p>You can find more information about antiviral medications for hepatitis B from reputable organizations like the Hepatitis B Foundation <a href="https://www.hepsanet.org/">https://www.hepsanet.org/</a>.</p> |
| 34. I have chronic hepatitis B and am using long-acting interferon treatment; what are the side effects of long-acting interferon? | <p>Thanks for reaching out about this, chronic hepatitis B is a serious condition, and long-acting interferon can be a very effective treatment, but it's important to be aware of the potential side effects. Here's a breakdown of some common ones:</p> <p><b>Flu-like symptoms:</b> This is very frequent, including fatigue, headache, muscle aches, and fever. These usually improve over time.</p> <p><b>Blood cell changes:</b> Interferon can lower your white blood cell count, increasing your risk of infections. It can</p>                                                                                                                                                                                                                                                                   |

|                                                                                                                                                                                                           |                                                                                                                                                                                                                                                                                                                                                                                                                                                                                                                                                                                                                                                                                                                                                                                                                                                                                                                                                                                                                                                                                                                                                                                                                                                                                                                                                                                                                                               |
|-----------------------------------------------------------------------------------------------------------------------------------------------------------------------------------------------------------|-----------------------------------------------------------------------------------------------------------------------------------------------------------------------------------------------------------------------------------------------------------------------------------------------------------------------------------------------------------------------------------------------------------------------------------------------------------------------------------------------------------------------------------------------------------------------------------------------------------------------------------------------------------------------------------------------------------------------------------------------------------------------------------------------------------------------------------------------------------------------------------------------------------------------------------------------------------------------------------------------------------------------------------------------------------------------------------------------------------------------------------------------------------------------------------------------------------------------------------------------------------------------------------------------------------------------------------------------------------------------------------------------------------------------------------------------|
|                                                                                                                                                                                                           | <p>also affect red blood cells and platelets. Your doctor will monitor these closely with blood tests.</p> <p><b>Mental health:</b> Interferon can worsen depression or anxiety, or even cause them in some cases. Be open with your doctor about any mood changes you experience.</p> <p><b>Injection site reactions:</b> Pain, redness, or swelling at the injection site are common.</p> <p><b>Other:</b> Hair loss, dry mouth, vision problems, and muscle weakness are also possible side effects.</p> <p><b>Long-term side effects</b> to be aware of include:</p> <p><b>Autoimmune problems:</b> Interferon can trigger autoimmune conditions like rheumatoid arthritis or psoriasis.</p> <p><b>Vision problems:</b> In rare cases, long-term use can lead to retinopathy, affecting your eyesight.</p> <p><b>Here's the most important thing:</b> If you experience any side effects, especially severe ones like suicidal thoughts, mental confusion, or severe pain, talk to your doctor right away. They can help manage your side effects and determine if interferon treatment is still right for you.</p> <p>It's also a good idea to discuss your concerns and expectations for treatment with your doctor. They can give you a more personalized perspective based on your specific condition and medical history.</p> <p>Do you have any other questions about long-acting interferon or chronic hepatitis B in general?</p> |
| <p>35. I have chronic hepatitis B and am using long-acting interferon treatment; what discomfort should I be aware of in my body? Under what circumstances should I seek immediate medical attention?</p> | <p><b>Discomfort with Long-Acting Interferon for Hepatitis B:</b></p> <p>It's understandable to have concerns about discomfort during long-acting interferon treatment for chronic hepatitis B. Here's what you might experience:</p> <p><b>Common Side Effects:</b></p> <p><b>Flu-like symptoms:</b> This includes fatigue, headache, fever, chills, and muscle aches.</p> <p><b>Mood changes:</b> Insomnia, irritability, and even depression can occur.</p>                                                                                                                                                                                                                                                                                                                                                                                                                                                                                                                                                                                                                                                                                                                                                                                                                                                                                                                                                                                |

|                                             |                                                                                                                                                                                                                                                                                                                                                                                                                                                                                                                                                                                                                                                                                                                                                                                                                                                                                                                                                                                                                                                                                                                                                                                                                                                                                                                                                                                                                                                                                                                                                                                                                                                                                                                                           |
|---------------------------------------------|-------------------------------------------------------------------------------------------------------------------------------------------------------------------------------------------------------------------------------------------------------------------------------------------------------------------------------------------------------------------------------------------------------------------------------------------------------------------------------------------------------------------------------------------------------------------------------------------------------------------------------------------------------------------------------------------------------------------------------------------------------------------------------------------------------------------------------------------------------------------------------------------------------------------------------------------------------------------------------------------------------------------------------------------------------------------------------------------------------------------------------------------------------------------------------------------------------------------------------------------------------------------------------------------------------------------------------------------------------------------------------------------------------------------------------------------------------------------------------------------------------------------------------------------------------------------------------------------------------------------------------------------------------------------------------------------------------------------------------------------|
|                                             | <p><b>Gastrointestinal issues:</b> Nausea and loss of appetite are possible.</p> <p><b>Blood count changes:</b> Low red blood cell count can lead to fatigue and shortness of breath.</p> <p><b>Skin problems:</b> Some experience itching and dry skin.</p> <p><b>Important Note:</b> This is not an exhaustive list. Be sure to discuss all potential side effects with your doctor who prescribed the interferon.</p> <p><b>When to Seek Immediate Medical Attention:</b></p> <p>While the side effects mentioned above are common, some require prompt medical attention:</p> <p><b>Severe or worsening flu-like symptoms:</b> High fever (over 102°F), persistent chills, or difficulty breathing.</p> <p><b>Signs of depression:</b> Feelings of hopelessness, suicidal thoughts, or significant changes in sleep or appetite.</p> <p><b>Severe bleeding or bruising:</b> This can indicate low blood cell counts.</p> <p><b>Yellowing of the skin or eyes (jaundice):</b> This could be a sign of liver problems.</p> <p><b>Mental confusion or difficulty thinking.</b></p> <p><b>Remember:</b> It's always best to err on the side of caution. If you experience any discomfort that worries you, contact your doctor or seek medical attention immediately.</p> <p><b>Additional Tips:</b></p> <p>Maintain open communication with your doctor about any side effects you experience.</p> <p>There might be ways to manage side effects, like over-the-counter medications for fever or nausea.</p> <p>Support groups for chronic hepatitis B patients can be a great resource for information and emotional support.</p> <p>I hope this information helps! Please don't hesitate to ask if you have any further questions.</p> |
| 36. I have chronic hepatitis B and am using | That's a great question. Since you have chronic hepatitis B and are on long-acting interferon treatment, here are some                                                                                                                                                                                                                                                                                                                                                                                                                                                                                                                                                                                                                                                                                                                                                                                                                                                                                                                                                                                                                                                                                                                                                                                                                                                                                                                                                                                                                                                                                                                                                                                                                    |

|                                                                                             |                                                                                                                                                                                                                                                                                                                                                                                                                                                                                                                                                                                                                                                                                                                                                                                                                                                                                                                                                                                                                                                                                                                                                                                                                                                                                                                                                                                                                                                                                                                                                                                                         |
|---------------------------------------------------------------------------------------------|---------------------------------------------------------------------------------------------------------------------------------------------------------------------------------------------------------------------------------------------------------------------------------------------------------------------------------------------------------------------------------------------------------------------------------------------------------------------------------------------------------------------------------------------------------------------------------------------------------------------------------------------------------------------------------------------------------------------------------------------------------------------------------------------------------------------------------------------------------------------------------------------------------------------------------------------------------------------------------------------------------------------------------------------------------------------------------------------------------------------------------------------------------------------------------------------------------------------------------------------------------------------------------------------------------------------------------------------------------------------------------------------------------------------------------------------------------------------------------------------------------------------------------------------------------------------------------------------------------|
| <p>long-acting interferon treatment; what indicators should I regularly check?</p>          | <p>key indicators you'll likely monitor regularly:</p> <p><b>Viral Load (HBV DNA):</b> This measures the amount of hepatitis B virus in your blood. It's a crucial indicator of treatment effectiveness.</p> <p><b>Liver Function Tests (LFTs):</b> These tests, like ALT (alanine aminotransferase) and AST (aspartate aminotransferase), assess your liver health and can show signs of inflammation or damage.</p> <p><b>Hepatitis B e antigen (HBeAg) and Hepatitis B surface antigen (HBsAg):</b> These markers indicate the stage of your infection and response to treatment. HBeAg loss and potentially HBsAg decline are positive signs.</p> <p><b>Complete Blood Count (CBC):</b> This might be monitored to check for side effects of interferon treatment, such as potential decreases in white blood cells.</p> <p><b>Here's some additional information to consider:</b></p> <p><b>Frequency of Monitoring:</b> Your doctor will determine how often you need these tests based on your specific condition and response to treatment. It might be every few weeks initially, then gradually less frequent as treatment progresses.</p> <p><b>Importance of Following Doctor's Orders:</b> Sticking to your doctor's recommended testing schedule is crucial to track treatment progress and identify any potential issues early on.</p> <p><b>Remember, I can't give specific medical advice.</b> However, I highly recommend discussing these points with your doctor to understand your personalized monitoring plan for chronic hepatitis B with long-acting interferon treatment.</p> |
| <p>37. When taking anti-hepatitis B medication, what dietary precautions should I take?</p> | <p>There aren't necessarily specific foods you need to avoid entirely while taking anti-hepatitis B medication. However, focusing on a generally healthy diet will support your overall well-being and your liver health in particular. Here are some key points to consider:</p> <p><b>Minimize alcohol:</b> Alcohol puts extra stress on your liver, so it's best to avoid it altogether or consume it in strict moderation.</p>                                                                                                                                                                                                                                                                                                                                                                                                                                                                                                                                                                                                                                                                                                                                                                                                                                                                                                                                                                                                                                                                                                                                                                      |

|                                                                                                        |                                                                                                                                                                                                                                                                                                                                                                                                                                                                                                                                                                                                                                                                                                                                      |
|--------------------------------------------------------------------------------------------------------|--------------------------------------------------------------------------------------------------------------------------------------------------------------------------------------------------------------------------------------------------------------------------------------------------------------------------------------------------------------------------------------------------------------------------------------------------------------------------------------------------------------------------------------------------------------------------------------------------------------------------------------------------------------------------------------------------------------------------------------|
|                                                                                                        | <p><b>Limit sugary drinks and processed foods:</b> These can contribute to weight gain and fatty liver disease, which you want to avoid. Opt for whole foods like fruits, vegetables, and whole grains.</p> <p><b>Choose lean protein sources:</b> Fish, poultry, and legumes are all good options. Limit red meat and processed meats like hot dogs and deli meats.</p> <p><b>Healthy fats are good:</b> Include healthy fats from sources like olive oil, nuts, and avocados in your diet.</p> <p>Remember, it's always a good idea to discuss any questions or concerns about your diet and medications with your doctor or a registered dietitian. They can tailor recommendations to your specific situation.</p>               |
| 38. I have just been diagnosed with hepatitis B; under what circumstances should I consider treatment? | <p>I understand this diagnosis can be concerning. Hepatitis B treatment decisions depend on a few factors, so let's break it down:</p> <p><b>Type of Infection:</b></p> <p><b>Acute Hepatitis B:</b> This is a short-term infection where your body fights off the virus. In most cases, acute hepatitis B doesn't require medication, but focus on rest, fluids, and a healthy diet to support your immune system.</p> <p><b>Chronic Hepatitis B:</b> This is a long-term infection where the virus persists. Here, treatment is more likely needed.</p> <p><b>Severity of Chronic Hepatitis B:</b></p> <p>Doctors will assess your liver function through blood tests. The level of liver damage determines treatment urgency.</p> |

|                                                                                                                                           |                                                                                                                                                                                                                                                                                                                                                                                                                                                                                                                                                                                                                                                                                                                                                                                                                                                                                                                                                                         |
|-------------------------------------------------------------------------------------------------------------------------------------------|-------------------------------------------------------------------------------------------------------------------------------------------------------------------------------------------------------------------------------------------------------------------------------------------------------------------------------------------------------------------------------------------------------------------------------------------------------------------------------------------------------------------------------------------------------------------------------------------------------------------------------------------------------------------------------------------------------------------------------------------------------------------------------------------------------------------------------------------------------------------------------------------------------------------------------------------------------------------------|
|                                                                                                                                           | <p><b>Other factors:</b></p> <p>Age and overall health<br/>Presence of other liver conditions</p> <p>Based on this, here's a general guideline:</p> <p><b>Treatment is usually recommended for chronic hepatitis B, especially if there's liver damage.<br/>Even without current damage, treatment might be advised if there's a high risk of future complications.</b></p> <p><b>The best course of action is to discuss your specific situation with your doctor.</b> They can review your test results, assess your individual risk factors, and create a personalized treatment plan if needed. There are various antiviral medications available that can effectively manage chronic hepatitis B.</p> <p>Here are some resources that you might find helpful:</p> <p>The Hepatitis B Foundation: [hepatitis b foundation ON Hepatitis B Foundation hepb.org]<br/>World Health Organization: Hepatitis B [hepatitis b who ON World Health Organization who.int]</p> |
| 39. I am a patient with chronic hepatitis B undergoing initial treatment; how often should I have check-ups during the treatment process? | <p>That's a great question. Generally, for chronic hepatitis B patients undergoing initial treatment, check-ups are recommended every 3-6 months. However, this can vary depending on your specific circumstances. Here's a breakdown:</p> <p><b>Standard Recommendation:</b> Every 6 months is the most common schedule for initial treatment check-ups. This allows your doctor to closely monitor your response to the medication and identify any potential side effects early on.</p> <p><b>More Frequent Check-Ups:</b> In some cases, your doctor might recommend more frequent check-ups, especially if you have additional health conditions or your initial blood tests show high viral loads.</p> <p><b>Less Frequent Check-Ups:</b> If you respond well to treatment and your viral load becomes undetectable, your</p>                                                                                                                                     |



|                                                                                                                                     |                                                                                                                                                                                                                                                                                                                                                                                                                                                                                                                                                                                                                                                                                                                                                                                                                                                                                                                                                                                                                                          |
|-------------------------------------------------------------------------------------------------------------------------------------|------------------------------------------------------------------------------------------------------------------------------------------------------------------------------------------------------------------------------------------------------------------------------------------------------------------------------------------------------------------------------------------------------------------------------------------------------------------------------------------------------------------------------------------------------------------------------------------------------------------------------------------------------------------------------------------------------------------------------------------------------------------------------------------------------------------------------------------------------------------------------------------------------------------------------------------------------------------------------------------------------------------------------------------|
|                                                                                                                                     | <p>doctor might space out your check-ups to every 12 months.</p> <p><b>Here's the key:</b> It's important to discuss the optimal check-up frequency with your doctor based on your individual situation and treatment plan. They can tailor the schedule to ensure you receive the best possible care.</p> <p>Do you have any other questions about chronic hepatitis B treatment or the check-up process?</p>                                                                                                                                                                                                                                                                                                                                                                                                                                                                                                                                                                                                                           |
| 40. I have chronic hepatitis B and am currently pregnant; what should I be aware of? How can I prevent transmission to the newborn? | <p>Absolutely, that's an important question. Here's what you should know about chronic hepatitis B and pregnancy:</p> <p><b>Transmission Risk:</b></p> <p>Unfortunately, Hepatitis B can be passed from mother to child during childbirth. Up to 90% of babies born to mothers with chronic hepatitis B can develop the chronic infection themselves if not properly protected.</p> <p><b>Reducing the Risk:</b></p> <p>The good news is there are very effective steps we can take to significantly reduce the risk of transmission:</p> <p><b>Early Detection:</b> All pregnant women are routinely screened for Hepatitis B during prenatal care. Knowing your status early allows for the best course of action.</p> <p><b>Viral Load Monitoring:</b> If you test positive, we'll monitor the amount of virus in your blood (viral load). High viral loads increase the transmission risk.</p> <p><b>Antiviral Medication:</b> In some cases, particularly with high viral loads, antiviral medication during the late pregnancy</p> |

|                                                   |                                                                                                                                                                                                                                                                                                                                                                                                                                                                                                                                                                                                                                                                                                                                                                                                                                                                                                                                                                                                                                                                                                                         |
|---------------------------------------------------|-------------------------------------------------------------------------------------------------------------------------------------------------------------------------------------------------------------------------------------------------------------------------------------------------------------------------------------------------------------------------------------------------------------------------------------------------------------------------------------------------------------------------------------------------------------------------------------------------------------------------------------------------------------------------------------------------------------------------------------------------------------------------------------------------------------------------------------------------------------------------------------------------------------------------------------------------------------------------------------------------------------------------------------------------------------------------------------------------------------------------|
|                                                   | <p>can significantly reduce the amount of virus in your blood, further lowering the transmission risk.</p> <p><b>Vaccination of Newborn:</b> Most importantly, your newborn will receive a series of vaccinations immediately after birth. This includes the Hepatitis B vaccine and Hepatitis B immune globulin (HBIG), which provide strong protection against chronic infection.</p> <p><b>Next Steps:</b></p> <p>Discuss this openly with your obstetrician. They can review your specific case, including your viral load, and create a personalized plan to minimize the risk of transmission to your baby.</p> <p>Here are some helpful resources you can look at as well:</p> <p>Centers for Disease Control and Prevention: <a href="#">Protect Your Baby for Life When a Pregnant Woman has Hepatitis B</a></p> <p>Hepatitis B Foundation: <a href="#">Hepatitis B and Pregnancy</a></p> <p>Remember, with proper precautions, you can have a healthy pregnancy and significantly reduce the risk of transmitting Hepatitis B to your baby. Don't hesitate to ask your doctor any questions you may have.</p> |
| 41. I have hepatitis C; how should it be treated? | <p>Hepatitis C is treatable, and the good news is that current medications have very high success rates! Here's the general approach:</p> <p><b>Direct-acting antiviral (DAA) medications:</b> These are the mainstay of treatment now. They come in pill form and typically have shorter treatment durations (8-12 weeks) with fewer side effects than older medications.</p> <p><b>Treatment tailoring:</b> The specific DAA regimen will depend on factors like your specific strain of Hepatitis C,</p>                                                                                                                                                                                                                                                                                                                                                                                                                                                                                                                                                                                                             |

|                                                               |                                                                                                                                                                                                                                                                                                                                                                                                                                                                                                                                                                                                                                                                                                                                                                                                                                                                                                                                                                                                                                                                                                                                                                                                                                                                                                                                                   |
|---------------------------------------------------------------|---------------------------------------------------------------------------------------------------------------------------------------------------------------------------------------------------------------------------------------------------------------------------------------------------------------------------------------------------------------------------------------------------------------------------------------------------------------------------------------------------------------------------------------------------------------------------------------------------------------------------------------------------------------------------------------------------------------------------------------------------------------------------------------------------------------------------------------------------------------------------------------------------------------------------------------------------------------------------------------------------------------------------------------------------------------------------------------------------------------------------------------------------------------------------------------------------------------------------------------------------------------------------------------------------------------------------------------------------|
|                                                               | <p>your liver function, and any other medical conditions you may have.</p> <p><b>Here's what I can't do as a Chief Physician in this roleplay setting:</b></p> <p>I can't prescribe medication or recommend a specific treatment plan.</p> <p>I can't diagnose your condition without a proper medical evaluation.</p> <p><b>What I strongly recommend:</b></p> <p>See a gastroenterologist or hepatologist (liver specialist) for a complete evaluation. They will assess your specific situation and determine the best course of treatment.</p> <p>There are resources available to help you with the cost of treatment. Your doctor's office can point you in the right direction.</p> <p>In the meantime, here are some reputable resources you can look at for more information:</p> <p>The National Institute of Diabetes and Digestive and Kidney Diseases: [National Institute of Diabetes and Digestive and Kidney Diseases hepatitis C ON National Institutes of Health (.gov) <a href="https://niddk.nih.gov">niddk.nih.gov</a>]</p> <p>The American Liver Foundation: [American Liver Foundation hepatitis C ON <a href="https://liverfoundation.org">liverfoundation.org</a>]</p> <p>Remember, with proper treatment, Hepatitis C is a very manageable condition. Please don't hesitate to ask if you have any other questions!</p> |
| 42. What are the common medications for treating hepatitis C? | <p>Hepatitis C is primarily treated with a class of medication called direct-acting antivirals, or DAAs. These medications have revolutionized treatment for Hep C, with very high cure rates and minimal side effects compared to older options. Here are some of the most common DAAs used in combinations for treatment:</p> <p><b>Sofosbuvir (Sovaldi)</b></p> <p><b>Velpatasvir (Epclusa)</b></p>                                                                                                                                                                                                                                                                                                                                                                                                                                                                                                                                                                                                                                                                                                                                                                                                                                                                                                                                            |

|                                                                            |                                                                                                                                                                                                                                                                                                                                                                                                                                                                                                                                                                                                                                                                                                                                                                                                                                                                                                                                                                                                                                |
|----------------------------------------------------------------------------|--------------------------------------------------------------------------------------------------------------------------------------------------------------------------------------------------------------------------------------------------------------------------------------------------------------------------------------------------------------------------------------------------------------------------------------------------------------------------------------------------------------------------------------------------------------------------------------------------------------------------------------------------------------------------------------------------------------------------------------------------------------------------------------------------------------------------------------------------------------------------------------------------------------------------------------------------------------------------------------------------------------------------------|
|                                                                            | <p> <b>Ledipasvir (Harvoni)</b><br/> <b>Elbasvir (Zepatier)</b><br/> <b>Grazoprevir (Zepatier)</b><br/> <b>Glecaprevir (Mavyret)</b><br/> <b>Pibrentasvir (Mavyret)</b> </p> <p>It's important to note that specific DAAs and treatment plans will vary depending on the type of Hepatitis C you have, your medical history, and other factors. I can't prescribe medication or recommend a specific treatment plan here, but I would strongly advise speaking with a doctor about your situation. They can determine the best course of action for you.</p> <p>Here are some resources that you might find helpful:</p> <p>           American Liver Foundation <a href="https://liverfoundation.org/">https://liverfoundation.org/</a><br/>           National Institute of Diabetes and Digestive and Kidney Diseases<br/> <a href="https://www.niddk.nih.gov/health-information/liver-disease/viral-hepatitis/hepatitis-c">https://www.niddk.nih.gov/health-information/liver-disease/viral-hepatitis/hepatitis-c</a> </p> |
| 43. What tests should I undergo before starting treatment for hepatitis C? | <p>There are a couple of key tests typically done before starting Hepatitis C treatment:</p> <p><b>Viral Load Test (HCV RNA Test):</b> This is a blood test that measures the amount of hepatitis C virus present in your bloodstream. It helps determine the severity of the infection and establish a baseline for monitoring treatment effectiveness.</p> <p><b>Liver Function Tests:</b> This is a group of blood tests that assess how well your liver is functioning. It can show any existing damage caused by Hepatitis C and helps doctors tailor treatment accordingly.</p>                                                                                                                                                                                                                                                                                                                                                                                                                                          |

|                                                                                                                                           |                                                                                                                                                                                                                                                                                                                                                                                                                                                                                                                                                                                                                                                                                                                                                                                                                                                                                                                                                                                                                                                                                                                        |
|-------------------------------------------------------------------------------------------------------------------------------------------|------------------------------------------------------------------------------------------------------------------------------------------------------------------------------------------------------------------------------------------------------------------------------------------------------------------------------------------------------------------------------------------------------------------------------------------------------------------------------------------------------------------------------------------------------------------------------------------------------------------------------------------------------------------------------------------------------------------------------------------------------------------------------------------------------------------------------------------------------------------------------------------------------------------------------------------------------------------------------------------------------------------------------------------------------------------------------------------------------------------------|
|                                                                                                                                           | <p>Additionally, your doctor might recommend other tests depending on your specific situation. These could include:</p> <p><b>Fibrosis Assessment:</b> This helps gauge the extent of liver scarring (fibrosis) caused by Hepatitis C. Different methods like FibroScan® are used for this assessment.</p> <p><b>Blood Count:</b> A complete blood count (CBC) might be done to get a general picture of your blood cell health.</p> <p><b>Pregnancy Test:</b> This is standard for women of childbearing age before starting some medications.</p> <p><b>Screening for Co-infections:</b> This might involve tests for other liver diseases like Hepatitis B or HIV, as co-infections can influence treatment decisions.</p> <p>Remember, this is not an exhaustive list, and the specific tests you undergo will be determined by your doctor after a thorough consultation. They will consider your medical history, current health status, and the type of Hepatitis C you have.</p> <p>If you have any further questions about these tests or Hepatitis C treatment in general, please don't hesitate to ask!</p> |
| <p>44. I have hepatitis C and high blood pressure; which blood pressure medications should not be taken with hepatitis C medications?</p> | <p>That's a great question, and it's important to address any potential interactions between medications. While there isn't a blanket rule that all blood pressure medications cause issues with Hepatitis C meds, some specific combinations can affect how well each other works.</p> <p>Here's the best course of action:</p> <p><b>Make a list of your current medications:</b> This includes not only prescriptions but also over-the-counter drugs and any supplements you take.</p> <p><b>Schedule an appointment with your doctor:</b> They can review your entire medication list and identify any potential interactions between your blood pressure medications and your Hepatitis C treatment plan.</p> <p><b>Work with your doctor on the best approach:</b> They may recommend alternative blood pressure medications or adjust the timing of when you take each medication to minimize interactions.</p>                                                                                                                                                                                                |

|                                                                                                                                             |                                                                                                                                                                                                                                                                                                                                                                                                                                                                                                                                                                                                                                                                                                                                                                                                                                                                                                                                                                                                                                                                                                           |
|---------------------------------------------------------------------------------------------------------------------------------------------|-----------------------------------------------------------------------------------------------------------------------------------------------------------------------------------------------------------------------------------------------------------------------------------------------------------------------------------------------------------------------------------------------------------------------------------------------------------------------------------------------------------------------------------------------------------------------------------------------------------------------------------------------------------------------------------------------------------------------------------------------------------------------------------------------------------------------------------------------------------------------------------------------------------------------------------------------------------------------------------------------------------------------------------------------------------------------------------------------------------|
|                                                                                                                                             | <p>In the meantime, here are some resources that you might find helpful:</p> <p>The American Liver Foundation: <a href="https://liverfoundation.org/">https://liverfoundation.org/</a> has information on Hepatitis C and medications to avoid.</p> <p>The National Institutes of Health: <a href="https://www.nih.gov/">https://www.nih.gov/</a> has a great resource on drug interactions.</p> <p>Remember, I can't give specific medical advice, but I hope this information empowers you to have a productive conversation with your doctor!</p>                                                                                                                                                                                                                                                                                                                                                                                                                                                                                                                                                      |
| 45. I have hepatitis C and diabetes; which diabetic medications should not be taken with hepatitis C medications?                           | <p>That's a great question, and it's important to be mindful of potential interactions between medications, especially when dealing with two conditions like hepatitis C and diabetes.</p> <p>The good news is, most common diabetic medications, like metformin, don't directly interfere with hepatitis C treatments, particularly the newer direct-acting antivirals (DAAs). In fact, some studies suggest metformin might even improve the effectiveness of the treatment for certain patients.</p> <p>However, some medications can affect your blood sugar control, so it's crucial to monitor your glucose levels closely, especially during the initial months of hepatitis C treatment. This might necessitate adjustments to your diabetic medication regimen.</p> <p>The best course of action is to discuss this with your doctor. They can review your specific medications and potential interactions, ensuring everything works together safely and effectively. They'll also be able to advise on blood sugar monitoring and any adjustments needed to your diabetic medication plan.</p> |
| 46. I have hepatitis C and coronary heart disease; which cholesterol-lowering medications should not be taken with hepatitis C medications? | <p>That's a great question, and it's important to consider both your heart health and hepatitis C treatment. Here's the key point:</p>                                                                                                                                                                                                                                                                                                                                                                                                                                                                                                                                                                                                                                                                                                                                                                                                                                                                                                                                                                    |

|                                                                                                                                                                     |                                                                                                                                                                                                                                                                                                                                                                                                                                                                                                                                                                                                                                                                                                                                                                                                                                                                                                                                                                                                                                                                                                                                                                                                              |
|---------------------------------------------------------------------------------------------------------------------------------------------------------------------|--------------------------------------------------------------------------------------------------------------------------------------------------------------------------------------------------------------------------------------------------------------------------------------------------------------------------------------------------------------------------------------------------------------------------------------------------------------------------------------------------------------------------------------------------------------------------------------------------------------------------------------------------------------------------------------------------------------------------------------------------------------------------------------------------------------------------------------------------------------------------------------------------------------------------------------------------------------------------------------------------------------------------------------------------------------------------------------------------------------------------------------------------------------------------------------------------------------|
|                                                                                                                                                                     | <p>There isn't a blanket rule that all cholesterol-lowering medications are off-limits with Hepatitis C medications.</p> <p>However, there can be interactions between certain types, particularly statins, and some hepatitis C drugs. These interactions can increase the statin levels in your body, potentially leading to muscle problems and even kidney issues.</p> <p>Here's what I recommend:</p> <p><b>Talk to your doctor about all the medications you're taking</b>, including cholesterol meds and any hepatitis C treatment you're on or considering.</p> <p>They can assess the specific medications involved and determine the safest course of action for managing both conditions.</p> <p>This might involve:</p> <ul style="list-style-type: none"> <li>Switching to a different statin medication that doesn't interact with your hepatitis C treatment.</li> <li>Adjusting the dosage of your current statin.</li> <li>Exploring alternative cholesterol-lowering medications.</li> </ul> <p>It's important to find the right balance between managing your heart disease and treating your hepatitis C effectively. Don't hesitate to discuss all your concerns with your doctor.</p> |
| <p>47. After standardized treatment for hepatitis C, if the hepatitis C RNA test is negative but hepatitis C antibodies are still positive, is there a problem?</p> | <p>No, a positive antibody test for Hepatitis C after successful treatment typically isn't a cause for concern. Here's why:</p> <p><b>Antibodies vs. RNA:</b> The antibody test detects your body's immune response to the Hepatitis C virus, while the RNA test shows the presence of the actual virus itself.</p> <p><b>Post-treatment immunity:</b> A positive antibody test after treatment simply means your body remembers encountering the virus and has built immunity. This is a good thing!</p> <p>Here are some additional points to consider:</p> <p><b>Standard follow-up:</b> It's normal to have repeat testing after Hepatitis C treatment to confirm the virus is gone.</p>                                                                                                                                                                                                                                                                                                                                                                                                                                                                                                                 |

|                                                                                                                                                                                                 |                                                                                                                                                                                                                                                                                                                                                                                                                                                                                                                                                                                                                                                                                                                                                                                                                                                                                                                                                                                                                                                                                                                                                                                                                                                                                                                                                                                                                                                                                    |
|-------------------------------------------------------------------------------------------------------------------------------------------------------------------------------------------------|------------------------------------------------------------------------------------------------------------------------------------------------------------------------------------------------------------------------------------------------------------------------------------------------------------------------------------------------------------------------------------------------------------------------------------------------------------------------------------------------------------------------------------------------------------------------------------------------------------------------------------------------------------------------------------------------------------------------------------------------------------------------------------------------------------------------------------------------------------------------------------------------------------------------------------------------------------------------------------------------------------------------------------------------------------------------------------------------------------------------------------------------------------------------------------------------------------------------------------------------------------------------------------------------------------------------------------------------------------------------------------------------------------------------------------------------------------------------------------|
|                                                                                                                                                                                                 | <p>This might include monitoring your antibody levels over time, though a negative RNA test is the main indicator of successful treatment.</p> <p><b>Rare exceptions:</b> In very rare cases, a positive antibody test with a negative RNA test could indicate a very low viral load. However, this is uncommon and your doctor would discuss this possibility with you.</p> <p><b>Overall, a negative RNA test after treatment is the most important indicator of a successful outcome.</b> If you have any concerns about your test results, it's always best to discuss them with the doctor who treated you for Hepatitis C.</p>                                                                                                                                                                                                                                                                                                                                                                                                                                                                                                                                                                                                                                                                                                                                                                                                                                               |
| <p>48. I have hepatitis C; after one month of antiviral treatment, the hepatitis C RNA test is negative; do I need to continue treatment for 3 to 6 months according to the treatment plan?</p> | <p>That's great news about your initial HCV RNA test coming back negative! While it's certainly encouraging, a single negative test after only one month of treatment isn't enough to confirm a cure for Hepatitis C.</p> <p>Here's the thing: Antiviral treatments typically take 3 to 6 months, depending on the specific medication and your individual case. A sustained virologic response (SVR), which essentially means the virus is undetectable and considered cured, is usually measured 12 weeks <b>after</b> completing the entire treatment plan.</p> <p>Therefore, it's absolutely crucial that you continue your antiviral treatment as prescribed by your doctor for the full duration. This ensures the medication has sufficient time to effectively eliminate the virus.</p> <p>Here's what I recommend:</p> <p>Follow your doctor's treatment plan religiously. Don't skip or alter doses without consulting them first.</p> <p>Schedule any follow-up appointments your doctor recommends. These will likely involve additional blood tests to monitor your progress, including another HCV RNA test at the appropriate time point after completing treatment.</p> <p>In the meantime, if you have any questions or concerns about your treatment plan, side effects, or anything else related to your Hepatitis C, don't hesitate to reach out to your doctor. They can provide the most specific and up-to-date guidance based on your individual case.</p> |



|                                                                                                                                                                   |                                                                                                                                                                                                                                                                                                                                                                                                                                                                                                                                                                                                                                                                                                                                                                                                                                                                                                                                                                           |
|-------------------------------------------------------------------------------------------------------------------------------------------------------------------|---------------------------------------------------------------------------------------------------------------------------------------------------------------------------------------------------------------------------------------------------------------------------------------------------------------------------------------------------------------------------------------------------------------------------------------------------------------------------------------------------------------------------------------------------------------------------------------------------------------------------------------------------------------------------------------------------------------------------------------------------------------------------------------------------------------------------------------------------------------------------------------------------------------------------------------------------------------------------|
| <p>49. If I have been treated for hepatitis C according to the treatment plan and recovered, can I get hepatitis C again?</p>                                     | <p>That's a good question. Here's the deal with Hepatitis C after successful treatment:</p> <p><b>Cured is Cured:</b> The good news is, if your treatment followed the plan and you've achieved a sustained virologic response (SVR), which means the virus is undetectable for a specific period, you are considered cured.</p> <p><b>Reinfection is Possible:</b> However, even though cured, it is possible to be reinfected with Hepatitis C again. This is because the treatment eradicates the existing virus but doesn't provide immunity to future exposure.</p> <p><b>Risk Factors for Reinfection:</b> Certain behaviors can increase your risk of reinfection. Sharing needles or drug equipment is a major one.</p> <p>If you're concerned about reinfection, I recommend talking to your doctor about your specific risk factors and how to minimize them. They can also advise on monitoring for signs of recurrence, though that's uncommon after SVR.</p> |
| <p>50. If I have been treated for hepatitis C according to the treatment plan and recovered, do I need further check-ups? How often should check-ups be done?</p> | <p>Excellent question! Following successful Hepatitis C treatment, check-ups are still important, but not as frequent as during treatment. Here's the breakdown:</p> <p><b>Confirmation of Cure:</b> The most crucial follow-up happens 12 weeks after completing treatment. A blood test, typically a PCR test, confirms if the virus is undetectable, signifying a cure (Sustained Virologic Response or SVR).</p> <p><b>Frequency of Check-Ups:</b> If cured (SVR) and with minimal liver damage, annual HCV RNA testing is usually recommended to monitor for reinfection, especially if you have ongoing risk factors. However, anti-HCV antibodies will always be positive, so no need to repeat that test.</p> <p><b>Liver Function Monitoring:</b> Depending on the extent of liver damage before treatment, your doctor might recommend</p>                                                                                                                      |

|                                                                      |                                                                                                                                                                                                                                                                                                                                                                                                                                                                                                                                                                                                                                                                                                                                                                                                                                                                                                                                                                                                                                                                                                               |
|----------------------------------------------------------------------|---------------------------------------------------------------------------------------------------------------------------------------------------------------------------------------------------------------------------------------------------------------------------------------------------------------------------------------------------------------------------------------------------------------------------------------------------------------------------------------------------------------------------------------------------------------------------------------------------------------------------------------------------------------------------------------------------------------------------------------------------------------------------------------------------------------------------------------------------------------------------------------------------------------------------------------------------------------------------------------------------------------------------------------------------------------------------------------------------------------|
|                                                                      | <p>monitoring liver function with blood tests like liver function panels (LFTs) at their discretion.</p> <p>Remember, this is a general guideline. The specific follow-up plan will be tailored to your individual situation. Always discuss your check-up frequency with the doctor who treated you.</p>                                                                                                                                                                                                                                                                                                                                                                                                                                                                                                                                                                                                                                                                                                                                                                                                     |
| 51. If diagnosed with chronic hepatitis E, how should it be treated? | <p>Chronic hepatitis E is a unique situation compared to acute hepatitis E. Here's the breakdown of treatment:</p> <p><b>Reducing Immunosuppressants:</b> If you have a weakened immune system due to an organ transplant or other reasons, your doctor might prioritize adjusting your immunosuppressant medications. This allows your body's natural defenses to fight off the hepatitis E virus.</p> <p><b>Antiviral Medication:</b> In some cases, an antiviral drug called Ribavirin might be prescribed. This medication helps eliminate the virus from your system. Typically, a course of Ribavirin lasts around 3 months.</p> <p><b>Important things to remember:</b></p> <p style="padding-left: 40px;">This information provides a general overview, and the specific treatment plan will be determined by your doctor based on your individual case.</p> <p style="padding-left: 40px;">It's crucial to consult a qualified physician for proper diagnosis and treatment of chronic hepatitis E.</p> <p>Do you have any other questions about chronic hepatitis E or liver health in general?</p> |

|                                                                              |                                                                                                                                                                                                                                                                                                                                                                                                                                                                                                                                                                                                                                                                                                                                                                                                                                                                                                                                                                                                                                                                                                                                                                                                                                                                                                                                                       |
|------------------------------------------------------------------------------|-------------------------------------------------------------------------------------------------------------------------------------------------------------------------------------------------------------------------------------------------------------------------------------------------------------------------------------------------------------------------------------------------------------------------------------------------------------------------------------------------------------------------------------------------------------------------------------------------------------------------------------------------------------------------------------------------------------------------------------------------------------------------------------------------------------------------------------------------------------------------------------------------------------------------------------------------------------------------------------------------------------------------------------------------------------------------------------------------------------------------------------------------------------------------------------------------------------------------------------------------------------------------------------------------------------------------------------------------------|
| <p>52. If a family member has hepatitis E, how should others prevent it?</p> | <p>Hepatitis E is spread through the fecal-oral route, so good hygiene is key to preventing it from spreading within a household. Here are some steps you can take:</p> <p><b>Frequent handwashing:</b> Wash your hands thoroughly with soap and water after using the toilet, changing diapers, and before preparing food. Alcohol-based hand sanitizers can be an added layer of protection, but they shouldn't replace soap and water handwashing.</p> <p><b>Food safety:</b> Practice safe food handling practices. This includes thoroughly cooking meat and seafood, washing all fruits and vegetables, and avoiding contaminated water sources like untreated tap water or well water.</p> <p><b>Proper sanitation:</b> Dispose of soiled diapers and other waste materials properly. Disinfect surfaces that may come into contact with stool, like toilets and bathroom surfaces.</p> <p>It's important to note that while there's no vaccine readily available for Hepatitis E in most regions, these hygiene measures can significantly reduce the risk of transmission.</p> <p>If you have any further questions or concerns, especially if you have young children or immunocompromised individuals in the household, I recommend speaking to your family doctor or an infectious disease specialist for more personalized guidance.</p> |
|------------------------------------------------------------------------------|-------------------------------------------------------------------------------------------------------------------------------------------------------------------------------------------------------------------------------------------------------------------------------------------------------------------------------------------------------------------------------------------------------------------------------------------------------------------------------------------------------------------------------------------------------------------------------------------------------------------------------------------------------------------------------------------------------------------------------------------------------------------------------------------------------------------------------------------------------------------------------------------------------------------------------------------------------------------------------------------------------------------------------------------------------------------------------------------------------------------------------------------------------------------------------------------------------------------------------------------------------------------------------------------------------------------------------------------------------|
